# Supplementary material for: Insights into pathological mechanisms and interventions revealed by analyzing a mathematical model for cone metabolism
Source: PubMed Central journal article supplement (PMC8905305; doi:10.1042/bsr20212457), 2022-03-08
Supplement: BSR-2021-2457_supp.pdf [file BSR-2021-2457_supp.pdf]

## Supplementary material

Supplementary time-dependent global sensitivity analysis (GSA) results from the “Model output sensitivity for low initial glucose level” section in the main article are presented in Figure S1 and explained in “GSA results for low initial glucose level,  $[G](0)=0.02$  mM”. Supplementary time-dependent global GSA results from the “Model output sensitivity for higher initial glucose level” section in the main article are presented in Figure S2 and explained in “GSA results for higher initial glucose level,  $[G](0)=2$  mM”. PRCC sensitivity analysis time series data generated during this study are presented in Tables S1 through S8. eFAST sensitivity analysis time series data generated during this study are presented in Tables S9 through S16.

### GSA results for low initial glucose level, $[G](0)=0.02$ mM

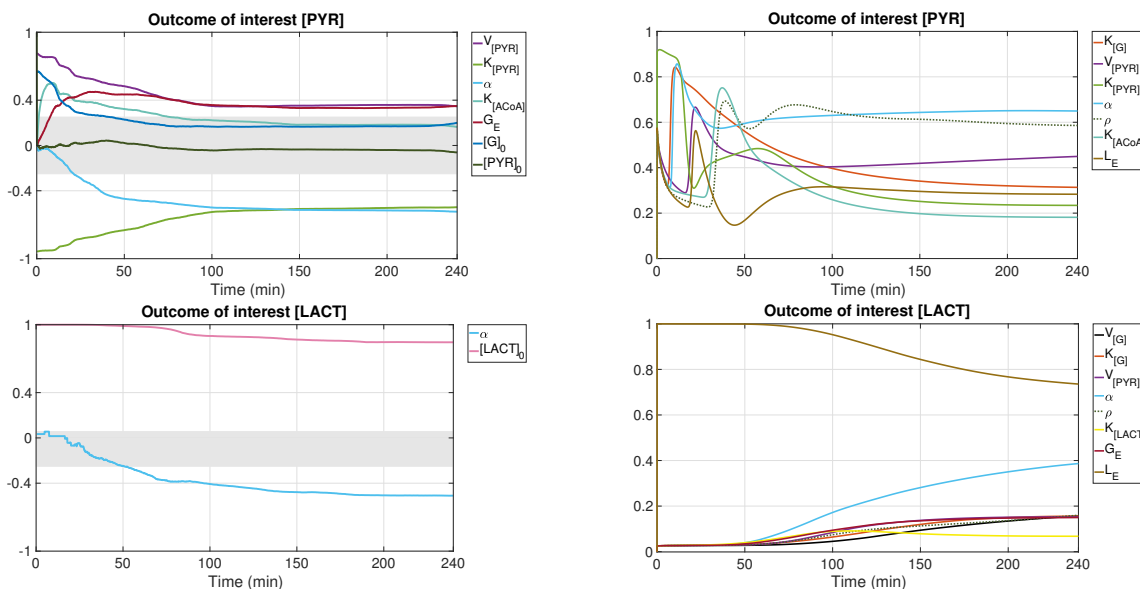

Figure S1: **Time-dependent global sensitivity analysis results for low initial glucose level.** Left panels present time-dependent results of PRCC and right panels present time-dependent results of eFAST, both for initial glucose concentration of  $[G](0) = 0.02$  mM. Outcome of interest: row 1 - pyruvate ([PYR]); row 2 - lactate ([LACT]). The gray bands on the left panels indicate PRCC values which are not statistically significant ( $p$ -value  $\geq 0.001$ ).

PRCC, [PYR]. The PRCC analysis shows that the input factors which significantly affect the pyruvate level initially are  $V_{[PYR]}$ ,  $K_{[PYR]}$ ,  $K_{[ACoA]}$ ,  $[G]_0$ , and  $[PYR]_0$  (the initial pyruvate concentration) (Figure 1, top left panel). By approximately 40 minutes the last three are no longer important, and  $[PYR]$  becomes sensitive to  $G_E$  and  $\alpha$ . After about 75 minutes,  $K_{[PYR]}$  and  $\alpha$  are the only influential factors. These results indicate that as the temporal dynamics of the metabolic system evolve, the ACoA biochemical reaction, external glucose, the maximal rate of pyruvate production and the initial glucose and pyruvate concentration lose their impact, but the half-limiting value of pyruvate synthesis from glucose as well as G3P utilization and oxidation of fatty acids remain essential for the pyruvate level.

eFAST, [PYR]. Similar to PRCC, eFAST highlights  $V_{[PYR]}$ ,  $K_{[PYR]}$ ,  $K_{[ACoA]}$  and  $\alpha$  as important (Figure 1, top right panel). Additional factors to which  $[PYR]$  is sensitive include  $K_{[G]}$ ,  $\rho$ , and  $L_E$ . In the first 100 minutes of the simulation, the sensitivity indices of all parameters exhibit transient dynamics, reaching a peak before 50 minutes. As the indices settle to stable levels, toward the end of the simulation  $\alpha$ ,  $\rho$  and  $V_{[PYR]}$  stand out as the three most important parameters. These findings suggest that RdCVF-stimulated glucose uptake, the half-limiting values of the pyruvate and ACoA biochemical reactions, external lactate, G3P utilization and oxidation of fatty acids, diversion of pyruvate to OXPHOS, and the maximal rate of pyruvate production are all influential in the beginning. However, later on the last three processes contribute

most to variability in the pyruvate concentration.

PRCC, [LACT]. PRCC shows that [LACT] is sensitive to just two factors: [LACT]<sub>0</sub>, which is influential throughout the whole time window, and  $\alpha$ , which becomes influential at about 75 minutes (Figure 1, bottom left). This means that with low initial glucose, only changes in the initial lactate concentration and changes in G3P utilization and oxidation of fatty acids affect the level of internal lactate.

eFAST, [LACT]. For the variability of internal lactate, eFAST identifies as most important  $L_E$ , which controls the lactate gradient-based gating mechanisms for flow into and out of the cell (Figure 1, bottom right). After 50 minutes, [LACT] also becomes sensitive to uncertainties other parameters:  $\alpha$ ,  $V_{[G]}$ ,  $K_{[G]}$ ,  $V_{[PYR]}$ ,  $\rho$ ,  $G_E$ , and  $K_{[LACT]}$  (half-limiting value of lactate production from pyruvate). Among those,  $\alpha$  has the most pronounced effect. These findings indicate that as the metabolic system dynamics evolve, in addition to the lactate gating mechanisms, other processes, most notably G3P utilization and oxidation of fatty acids, become important in relation to the variability of the internal lactate concentration.

## GSA results for higher initial glucose level, [G](0)=2 mM

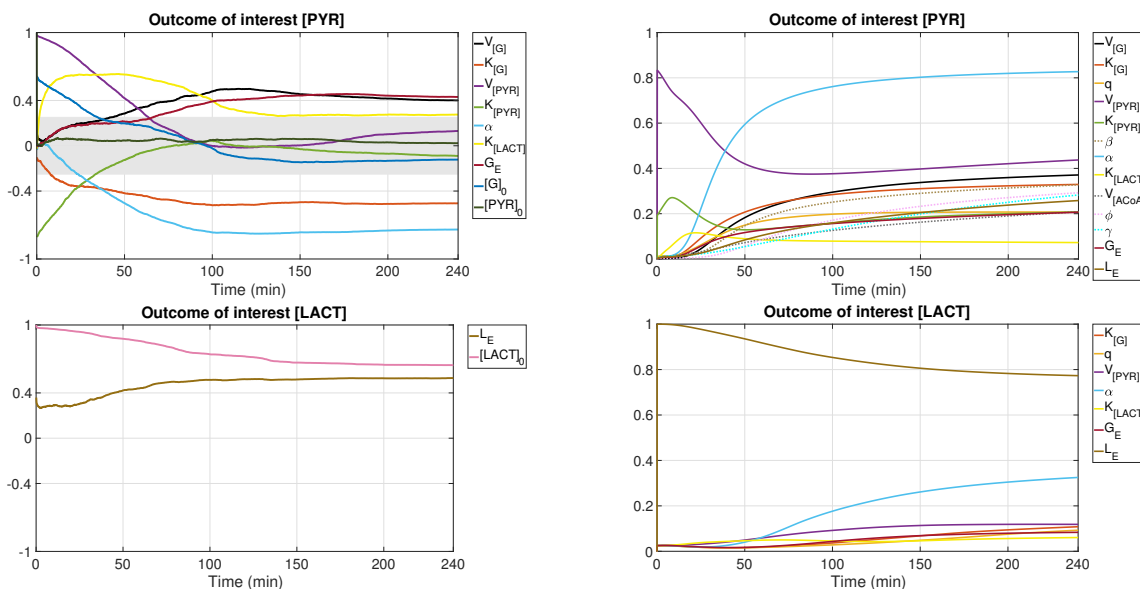

Figure S2: **Time-dependent global sensitivity analysis results for higher initial glucose level.** Left panels present time-dependent results of PRCC and right panels present time-dependent results of eFAST, both for initial glucose concentration of  $[G](0) = 2$  mM. Outcome of interest: row 1 - pyruvate ([PYR]); row 2 - lactate ([LACT]). The gray bands on the left panels indicate PRCC values which are not statistically significant ( $p\text{-value} \geq 0.001$ ); no gray band means that the PRCC values are statistically significant throughout the whole time frame (left-bottom panel).

PRCC, [PYR]. PRCC reveals that initially the pyruvate level is sensitive to  $V_{[PYR]}$ ,  $K_{[PYR]}$ ,  $[G]_0$  and  $[PYR]_0$ , but these factors are no longer important after 50 minutes (Figure 2, top left). On the other hand,  $K_{[LACT]}$  has an impact between 5 and 100 minutes. Also, [PYR] is initially insensitive to changes in  $\alpha$ ,  $K_{[G]}$ ,  $V_{[G]}$ , and  $G_E$ , but becomes sensitive at about 40, 50, 75, and 10 minutes, respectively. These results suggest that while in the beginning the pyruvate biochemical dynamics and the initial glucose and pyruvate concentrations influence the pyruvate level the most, as time progresses other factors become dominant, such as lactate synthesis, RdCVF-stimulated glucose uptake, external glucose, and G3P utilization and oxidation of fatty acids.

eFAST, [PYR]. In addition to  $V_{[G]}$ ,  $K_{[G]}$ ,  $V_{[PYR]}$ ,  $K_{[PYR]}$ ,  $\alpha$ ,  $K_{[LACT]}$ , and  $G_E$ , which were highlighted as important with PRCC, eFAST identifies several new parameters as contributing to the variability of pyruvate:  $q$ ,  $\beta$  (the rate of CIT inhibition of glycolysis),  $V_{[ACoA]}$ ,  $\phi$ ,  $\gamma$  (the maximum velocity of lactate transport contributing to ACoA production), and  $L_E$  (Figure 2, top right). Among all of those, the parameters with

the greatest sensitivity indices are  $V_{[\text{PYR}]}$ , dominating until 40 minutes, and  $\alpha$ , dominating from 40 minutes until the end of the simulation. These findings indicate that apart from uncertainty in the production of PYR, uncertainty in other processes, such as external glucose, RdCVF-stimulated glucose uptake, glycolysis inhibition, external lactate, G3P synthesis, LACT and ACoA production, CIT conversion to ATP and G3P utilization and oxidation of fatty acids, also play an important role in the variability of pyruvate.

**PRCC, [LACT].** PRCC shows that the internal lactate level is sensitive to only  $[\text{LACT}]_0$  and  $L_E$  (Figure 2, bottom left).  $[\text{LACT}]_0$  is influential throughout the entire simulation window, and  $L_E$  becomes influential after 50. This means that with higher initial glucose, only changes in the initial lactate concentration and external lactate affect the level of internal lactate.

**eFAST, [LACT].** eFAST shows that  $L_E$  has the greatest impact on the variability of internal lactate (Figure 2, bottom right). After 50 minutes, several other parameters, including  $\alpha$ ,  $K_{[\text{G}]}$ ,  $q$ ,  $V_{[\text{PYR}]}$ ,  $K_{[\text{LACT}]}$ , and  $G_E$ , emerge as important, but to a lower extent compared to  $L_E$ . Among those,  $\alpha$  has the most pronounced effect. These findings suggest that over time, apart from uncertainty in external lactate, uncertainties in additional processes, most notably G3P utilization and oxidation of fatty acids, make a sizable contribution to the variability of internal lactate.

Comparing the GSA results with the two different initial glucose levels, we make the following observations. PRCC reveals that when  $[\text{G}](0)$  is low,  $G_E$  plays a role in the level of pyruvate earlier compared to the case of higher  $[\text{G}](0)$ . With PRCC we also see that  $[\text{PYR}]$  is sensitive to  $V_{[\text{PYR}]}$  for both levels of initial glucose, but becomes insensitive faster for higher levels of initial glucose. Additionally, while  $K_{[\text{PYR}]}$  is important throughout the whole time frame with low initial glucose, it is only important in the first 25 minutes with higher initial glucose. This indicates that when there is more glucose present initially, the pyruvate level is not strongly affected by the maximal velocity and half-saturation value of the glucose conversion to pyruvate. Finally, with low initial glucose,  $[\text{PYR}]$  is sensitive to  $K_{[\text{ACoA}]}$ , but for higher initial glucose,  $K_{[\text{LACT}]}$  appears as influential. This suggests that the pyruvate-to-ACoA pathway plays a role for low initial glucose, while the pyruvate-to-lactate pathway gains importance for higher initial glucose.

When intracellular lactate is the outcome of interest, PRCC identifies  $[\text{LACT}]_0$  as a factor influencing the lactate level whether  $[\text{G}](0)$  is low or higher. For low  $[\text{G}](0)$ ,  $[\text{LACT}]$  is sensitive to  $\alpha$ , whereas for higher  $[\text{G}](0)$ ,  $[\text{LACT}]$  is sensitive to  $L_E$ . With the low  $[\text{G}](0)$ , the cell may not have enough material to produce ample lactate, so the internal lactate concentration will possibly never exceed or only slightly exceed the external lactate level. Since the gating mechanisms for lactate leaving the cell is governed by the gradient between internal and external lactate, the gate would remain closed or be open with very minimal flux, which explains why the internal lactate level is not sensitive to  $L_E$  for low  $[\text{G}](0)$ . With higher  $[\text{G}](0)$ , PRCC shows that an increase in  $L_E$  will result in higher level of lactate inside the cell. This is because with more initial glucose, the cell can produce sufficient amount of lactate allowing the gate for lactate exit to be open with strong flux. Thus, increasing  $L_E$  beyond the intracellular lactate level will cause the gate to close, promoting an increase of lactate inside the cell.

## PRCC and eFAST sensitivity analysis data

The rest of this document contains the time series data generated during this study by conducting PRCC and eFAST sensitivity analysis in the temporal window 0–240 minutes with  $[\text{G}](0)=0.02$  mM and  $[\text{G}](0)=2$  mM. The tables show the time discretization and include only the parameters to which the level and variability of the model outputs are sensitive to. In Tables S1 through S8, the sensitivity analysis data from PRCC for  $[\text{G}]$ ,  $[\text{G3P}]$ ,  $[\text{PYR}]$  and  $[\text{LACT}]$  is presented (PRCC sensitivity indices followed by their corresponding p-values). In Tables S9 through S16, the sensitivity analysis data from eFAST for  $[\text{G}]$ ,  $[\text{G3P}]$ ,  $[\text{PYR}]$  and  $[\text{LACT}]$  is shown.

Table S1: PRCR analysis data for [G] with [G]([G])=0.02 mM; PRCR sensitivity indices and their corresponding p-values

| Time discretization |            |           |           |            |           | Sensitivity analysis data for PRCR [G] with [G]([G])=0.02 mM (only the parameters to which [G]'s level is sensitive to appear) |            |            |           |           |            | Time discretization |            |         |            |           |           |
|---------------------|------------|-----------|-----------|------------|-----------|--------------------------------------------------------------------------------------------------------------------------------|------------|------------|-----------|-----------|------------|---------------------|------------|---------|------------|-----------|-----------|
| q                   | K [G]([G]) | K [PVR]   | alpha     | G          | [G]_0     | q                                                                                                                              | K [G]([G]) | K [PVR]    | alpha     | G         | [G]_0      | q                   | K [G]([G]) | K [PVR] | alpha      | G         | [G]_0     |
| 0                   | 0          | 0         | 0         | 0          | 0         | 1                                                                                                                              | 0          | 0          | 0         | 0         | 0          | 1                   | 0          | 0       | 0          | 0         | 0         |
| 0.1                 | -1.990002  | 0.055236  | 0.214228  | -0.059367  | 0.1163868 | 0.9897675                                                                                                                      | 0.1        | -1.990002  | 0.055236  | 0.214228  | -0.059367  | 0.1163868           | 0.9897675  | 0.1     | -1.990002  | 0.055236  | 0.214228  |
| 0.2                 | -1.1641038 | 0.086453  | 0.1624009 | -0.093359  | 0.1907401 | 0.9959437                                                                                                                      | 0.2        | -1.1641038 | 0.086453  | 0.1624009 | -0.093359  | 0.1907401           | 0.9959437  | 0.2     | -1.1641038 | 0.086453  | 0.1624009 |
| 0.3                 | -1.830956  | 0.0884514 | 0.1374008 | -0.067361  | 0.2024588 | 0.9910286                                                                                                                      | 0.3        | -1.830956  | 0.0884514 | 0.1374008 | -0.067361  | 0.2024588           | 0.9910286  | 0.3     | -1.830956  | 0.0884514 | 0.1374008 |
| 0.4                 | -1.891284  | 0.0882099 | 0.1370688 | -0.081605  | 0.2104714 | 0.9853867                                                                                                                      | 0.4        | -1.891284  | 0.0882099 | 0.1370688 | -0.081605  | 0.2104714           | 0.9853867  | 0.4     | -1.891284  | 0.0882099 | 0.1370688 |
| 0.5                 | -1.818504  | 0.0872913 | 0.1816044 | -0.081253  | 0.2281094 | 0.9785878                                                                                                                      | 0.5        | -1.818504  | 0.0872913 | 0.1816044 | -0.081253  | 0.2281094           | 0.9785878  | 0.5     | -1.818504  | 0.0872913 | 0.1816044 |
| 0.6                 | -1.896545  | 0.0979813 | 0.1951706 | -0.0871358 | 0.2513657 | 0.9740802                                                                                                                      | 0.6        | -1.896545  | 0.0979813 | 0.1951706 | -0.0871358 | 0.2513657           | 0.9740802  | 0.6     | -1.896545  | 0.0979813 | 0.1951706 |
| 0.7                 | -1.879903  | 0.1047205 | 0.406764  | -0.088261  | 0.2772821 | 0.9692001                                                                                                                      | 0.7        | -1.879903  | 0.1047205 | 0.406764  | -0.088261  | 0.2772821           | 0.9692001  | 0.7     | -1.879903  | 0.1047205 | 0.406764  |
| 0.8                 | -1.981138  | 0.1108249 | 0.4193194 | -0.093124  | 0.2951310 | 0.9644049                                                                                                                      | 0.8        | -1.981138  | 0.1108249 | 0.4193194 | -0.093124  | 0.2951310           | 0.9644049  | 0.8     | -1.981138  | 0.1108249 | 0.4193194 |
| 0.9                 | -2.127556  | 0.1012974 | 0.4218233 | -0.094440  | 0.3114995 | 0.9592279                                                                                                                      | 0.9        | -2.127556  | 0.1012974 | 0.4218233 | -0.094440  | 0.3114995           | 0.9592279  | 0.9     | -2.127556  | 0.1012974 | 0.4218233 |
| 1                   | -2.126911  | 0.1162755 | 0.4319038 | -0.100263  | 0.3333338 | 0.9546625                                                                                                                      | 1          | -2.126911  | 0.1162755 | 0.4319038 | -0.100263  | 0.3333338           | 0.9546625  | 1       | -2.126911  | 0.1162755 | 0.4319038 |
| 1.1                 | -2.293361  | 0.1354906 | 0.4984848 | -0.096750  | 0.3537475 | 0.9491317                                                                                                                      | 1.1        | -2.293361  | 0.1354906 | 0.4984848 | -0.096750  | 0.3537475           | 0.9491317  | 1.1     | -2.293361  | 0.1354906 | 0.4984848 |
| 1.2                 | -2.239766  | 0.1480549 | 0.6434071 | -0.093521  | 0.3661188 | 0.9440237                                                                                                                      | 1.2        | -2.239766  | 0.1480549 | 0.6434071 | -0.093521  | 0.3661188           | 0.9440237  | 1.2     | -2.239766  | 0.1480549 | 0.6434071 |
| 1.3                 | -2.396968  | 0.1570245 | 0.4495209 | -0.097401  | 0.3780304 | 0.9403517                                                                                                                      | 1.3        | -2.396968  | 0.1570245 | 0.4495209 | -0.097401  | 0.3780304           | 0.9403517  | 1.3     | -2.396968  | 0.1570245 | 0.4495209 |
| 1.4                 | -2.499119  | 0.1703554 | 0.6112111 | -0.098781  | 0.3885107 | 0.9365516                                                                                                                      | 1.4        | -2.499119  | 0.1703554 | 0.6112111 | -0.098781  | 0.3885107           | 0.9365516  | 1.4     | -2.499119  | 0.1703554 | 0.6112111 |
| 1.5                 | -2.573201  | 0.1957024 | 0.7195702 | -0.100263  | 0.3985107 | 0.9328595                                                                                                                      | 1.5        | -2.573201  | 0.1957024 | 0.7195702 | -0.100263  | 0.3985107           | 0.9328595  | 1.5     | -2.573201  | 0.1957024 | 0.7195702 |
| 1.6                 | -2.665544  | 0.1873534 | 0.4745423 | -0.095513  | 0.4140429 | 0.9292705                                                                                                                      | 1.6        | -2.665544  | 0.1873534 | 0.4745423 | -0.095513  | 0.4140429           | 0.9292705  | 1.6     | -2.665544  | 0.1873534 | 0.4745423 |
| 1.7                 | -2.767014  | 0.1868631 | 0.4832565 | -0.0898458 | 0.4274631 | 0.9263291                                                                                                                      | 1.7        | -2.767014  | 0.1868631 | 0.4832565 | -0.0898458 | 0.4274631           | 0.9263291  | 1.7     | -2.767014  | 0.1868631 | 0.4832565 |
| 1.8                 | -2.813968  | 0.205891  | 0.4939305 | -0.086053  | 0.4370242 | 0.9230096                                                                                                                      | 1.8        | -2.813968  | 0.205891  | 0.4939305 | -0.086053  | 0.4370242           | 0.9230096  | 1.8     | -2.813968  | 0.205891  | 0.4939305 |
| 1.9                 | -2.898939  | 0.1931442 | 0.5170103 | -0.088979  | 0.4545402 | 0.9198767                                                                                                                      | 1.9        | -2.898939  | 0.1931442 | 0.5170103 | -0.088979  | 0.4545402           | 0.9198767  | 1.9     | -2.898939  | 0.1931442 | 0.5170103 |
| 2                   | -2.96345   | 0.2315856 | 0.5097716 | -0.092058  | 0.4684444 | 0.9177234                                                                                                                      | 2          | -2.96345   | 0.2315856 | 0.5097716 | -0.092058  | 0.4684444           | 0.9177234  | 2       | -2.96345   | 0.2315856 | 0.5097716 |
| 2.1                 | -3.011628  | 0.2372874 | 0.5112024 | -0.099614  | 0.4854289 | 0.9145866                                                                                                                      | 2.1        | -3.011628  | 0.2372874 | 0.5112024 | -0.099614  | 0.4854289           | 0.9145866  | 2.1     | -3.011628  | 0.2372874 | 0.5112024 |
| 2.2                 | -3.038976  | 0.2467761 | 0.5453234 | -0.100263  | 0.4742284 | 0.9128975                                                                                                                      | 2.2        | -3.038976  | 0.2467761 | 0.5453234 | -0.100263  | 0.4742284           | 0.9128975  | 2.2     | -3.038976  | 0.2467761 | 0.5453234 |
| 2.3                 | -3.142675  | 0.2638061 | 0.5215242 | -0.098261  | 0.4843309 | 0.9084777                                                                                                                      | 2.3        | -3.142675  | 0.2638061 | 0.5215242 | -0.098261  | 0.4843309           | 0.9084777  | 2.3     | -3.142675  | 0.2638061 | 0.5215242 |
| 2.4                 | -3.232685  | 0.2638061 | 0.5258974 | -0.105187  | 0.4961724 | 0.9042766                                                                                                                      | 2.4        | -3.232685  | 0.2638061 | 0.5258974 | -0.105187  | 0.4961724           | 0.9042766  | 2.4     | -3.232685  | 0.2638061 | 0.5258974 |
| 2.5                 | -3.346019  | 0.2732404 | 0.2929476 | -0.108727  | 0.5006160 | 0.9012127                                                                                                                      | 2.5        | -3.346019  | 0.2732404 | 0.2929476 | -0.108727  | 0.5006160           | 0.9012127  | 2.5     | -3.346019  | 0.2732404 | 0.2929476 |
| 2.6                 | -3.395747  | 0.2828859 | 0.3158823 | -0.109688  | 0.5127727 | 0.8980963                                                                                                                      | 2.6        | -3.395747  | 0.2828859 | 0.3158823 | -0.109688  | 0.5127727           | 0.8980963  | 2.6     | -3.395747  | 0.2828859 | 0.3158823 |
| 2.7                 | -3.418405  | 0.2888359 | 0.5407187 | -0.110753  | 0.5194863 | 0.8971121                                                                                                                      | 2.7        | -3.418405  | 0.2888359 | 0.5407187 | -0.110753  | 0.5194863           | 0.8971121  | 2.7     | -3.418405  | 0.2888359 | 0.5407187 |
| 2.8                 | -3.520241  | 0.2992249 | 0.5437036 | -0.119353  | 0.5245165 | 0.8944949                                                                                                                      | 2.8        | -3.520241  | 0.2992249 | 0.5437036 | -0.119353  | 0.5245165           | 0.8944949  | 2.8     | -3.520241  | 0.2992249 | 0.5437036 |
| 2.9                 | -3.588484  | 0.3088858 | 0.5185823 | -0.120653  | 0.5306252 | 0.8918766                                                                                                                      | 2.9        | -3.588484  | 0.3088858 | 0.5185823 | -0.120653  | 0.5306252           | 0.8918766  | 2.9     | -3.588484  | 0.3088858 | 0.5185823 |
| 3                   | -3.629639  | 0.3124349 | 0.5382216 | -0.114026  | 0.5382816 | 0.8880648                                                                                                                      | 3          | -3.629639  | 0.3124349 | 0.5382216 | -0.114026  | 0.5382816           | 0.8880648  | 3       | -3.629639  | 0.3124349 | 0.5382216 |
| 3.1                 | -3.675855  | 0.3193719 | 0.5542520 | -0.116783  | 0.5425165 | 0.8838765                                                                                                                      | 3.1        | -3.675855  | 0.3193719 | 0.5542520 | -0.116783  | 0.5425165           | 0.8838765  | 3.1     | -3.675855  | 0.3193719 | 0.5542520 |
| 3.2                 | -3.734111  | 0.3278124 | 0.5718561 | -0.119353  | 0.5470123 | 0.8793123                                                                                                                      | 3.2        | -3.734111  | 0.3278124 | 0.5718561 | -0.119353  | 0.5470123           | 0.8793123  | 3.2     | -3.734111  | 0.3278124 | 0.5718561 |
| 3.3                 | -3.775978  | 0.3369348 | 0.5028731 | -0.121475  | 0.5550332 | 0.8778288                                                                                                                      | 3.3        | -3.775978  | 0.3369348 | 0.5028731 | -0.121475  | 0.5550332           | 0.8778288  | 3.3     | -3.775978  | 0.3369348 | 0.5028731 |
| 3.4                 | -3.825285  | 0.3460784 | 0.5825265 | -0.123619  | 0.5634501 | 0.8753927                                                                                                                      | 3.4        | -3.825285  | 0.3460784 | 0.5825265 | -0.123619  | 0.5634501           | 0.8753927  | 3.4     | -3.825285  | 0.3460784 | 0.5825265 |
| 3.5                 | -3.884234  | 0.3530031 | 0.5718561 | -0.127377  | 0.5681260 | 0.8702215                                                                                                                      | 3.5        | -3.884234  | 0.3530031 | 0.5718561 | -0.127377  | 0.5681260           | 0.8702215  | 3.5     | -3.884234  | 0.3530031 | 0.5718561 |
| 3.6                 | -3.951781  | 0.3610129 | 0.5758823 | -0.130923  | 0.5737603 | 0.8647344                                                                                                                      | 3.6        | -3.951781  | 0.3610129 | 0.5758823 | -0.130923  | 0.5737603           | 0.8647344  | 3.6     | -3.951781  | 0.3610129 | 0.5758823 |
| 3.7                 | -3.993658  | 0.3662177 | 0.5201851 | -0.134007  | 0.5759983 | 0.8632083                                                                                                                      | 3.7        | -3.993658  | 0.3662177 | 0.5201851 | -0.134007  | 0.5759983           | 0.8632083  | 3.7     | -3.993658  | 0.3662177 | 0.5201851 |
| 3.8                 | -4.027765  | 0.3702269 | 0.5861202 | -0.138233  | 0.5812586 | 0.8600847                                                                                                                      | 3.8        | -4.027765  | 0.3702269 | 0.5861202 | -0.138233  | 0.5812586           | 0.8600847  | 3.8     | -4.027765  | 0.3702269 | 0.5861202 |
| 3.9                 | -4.070128  | 0.3747741 | 0.5758823 | -0.141002  | 0.5829744 | 0.8573923                                                                                                                      | 3.9        | -4.070128  | 0.3747741 | 0.5758823 | -0.141002  | 0.5829744           | 0.8573923  | 3.9     | -4.070128  | 0.3747741 | 0.5758823 |
| 4                   | -4.124555  | 0.3790793 | 0.5907716 | -0.157188  | 0.5945914 | 0.8558003                                                                                                                      | 4          | -4.124555  | 0.3790793 | 0.5907716 | -0.157188  | 0.5945914           | 0.8558003  | 4       | -4.124555  | 0.3790793 | 0.5907716 |
| 4.1                 | -4.143489  | 0.3820303 | 0.5861202 | -0.151569  | 0.6001433 | 0.8469196                                                                                                                      | 4.1        | -4.143489  | 0.3820303 | 0.5861202 | -0.151569  | 0.6001433           | 0.8469196  | 4.1     | -4.143489  | 0.3820303 | 0.5861202 |
| 4.2                 | -4.18373   | 0.3896152 | 0.6018561 | -0.156568  | 0.6060782 | 0.8464874                                                                                                                      | 4.2        | -4.18373   | 0.3896152 | 0.6018561 | -0.156568  | 0.6060782           | 0.8464874  | 4.2     | -4.18373   | 0.3896152 | 0.6018561 |
| 4.3                 | -4.227155  | 0.3973978 | 0.5758823 | -0.162049  | 0.6127727 | 0.8429633                                                                                                                      | 4.3        | -4.227155  | 0.3973978 | 0.5758823 | -0.162049  | 0.6127727           | 0.8429633  | 4.3     | -4.227155  | 0.3973978 | 0.5758823 |
| 4.4                 | -4.218807  | 0.3954826 | 0.6097419 | -0.157716  | 0.6125253 | 0.8381246                                                                                                                      | 4.4        | -4.218807  | 0.3954826 | 0.6097419 | -0.157716  | 0.6125253           | 0.8381246  | 4.4     | -4.218807  | 0.3954826 | 0.6097419 |
| 4.5                 | -4.277397  | 0.4137784 | 0.6029489 | -0.169189  | 0.6278877 | 0.8342501                                                                                                                      | 4.5        | -4.277397  | 0.4137784 | 0.6029489 | -0.169189  | 0.6278877           | 0.8342501  | 4.5     | -4.277397  | 0.4137784 | 0.6029489 |
| 4.6                 | -4.347155  | 0.4228859 | 0.6049656 | -0.176588  | 0.6350252 | 0.8298963                                                                                                                      | 4.6        | -4.347155  | 0.4228859 | 0.6049656 | -0.176588  | 0.6350252           | 0.8298963  | 4.6     | -4.347155  | 0.4228859 | 0.6049656 |
| 4.7                 | -4.427861  | 0.4307699 | 0.6095106 | -0.186289  | 0.6381518 | 0.8253147                                                                                                                      | 4.7        | -4.427861  | 0.4307699 | 0.6095106 | -0.186289  | 0.6381518           | 0.8253147  | 4.7     | -4.427861  | 0.4307699 | 0.6095106 |
| 4.8                 | -4.482502  | 0.4409509 | 0.6039259 | -0.195697  | 0.6416078 | 0.8188111                                                                                                                      | 4.8        | -4.482502  | 0.4409509 | 0.6039259 | -0.195697  | 0.6416078           | 0.8188111  | 4.8     | -4.482502  | 0.4409509 | 0.6039259 |
| 4.9                 | -4.547904  | 0.4483214 | 0.6156641 | -0.205184  | 0.6452816 | 0.8142184                                                                                                                      | 4.9        | -4.547904  | 0.4483214 | 0.6156641 | -0.205184  | 0.6452816           | 0.8142184  | 4.9     | -4.547904  | 0.4483214 | 0.6156641 |
| 5                   | -4.634163  | 0.4519346 | 0.6194916 | -0.216391  | 0.6441566 | 0.8087238                                                                                                                      | 5          | -4.634163  | 0.4519346 | 0.6194916 | -0.216391  | 0.6441566           | 0.8087238  | 5       | -4.634163  | 0.4519346 | 0.6194916 |
| 5.1                 | -4.736401  | 0.4217552 | 0.6188423 | -0.165781  | 0.6476975 | 0.8032728                                                                                                                      | 5.1        | -4.736401  | 0.4217552 | 0.6188423 | -0.165781  | 0.6476975           | 0.8032728  | 5.1     | -4.736401  | 0.4217552 | 0.6188423 |
| 5.2                 | -4.848851  |           |           |            |           |                                                                                                                                |            |            |           |           |            |                     |            |         |            |           |           |



|      |           |          |          |          |          |           |      |           |           |           |           |           |            |      |            |           |           |           |           |           |      |           |           |           |           |           |           |    |            |           |           |           |           |           |      |            |           |           |           |           |           |      |            |           |           |           |           |           |      |            |           |           |           |           |           |      |            |           |           |           |           |           |      |            |           |           |           |           |           |      |            |           |           |           |           |           |      |            |           |           |           |           |           |      |            |           |           |           |           |           |      |            |           |           |           |           |           |      |            |           |           |           |           |           |      |            |           |           |           |           |           |      |            |           |           |           |           |           |      |            |           |           |           |           |           |      |            |           |           |           |           |           |      |            |           |           |           |           |           |      |            |           |           |           |           |           |      |            |           |           |           |           |           |      |            |           |           |           |           |           |      |            |           |           |           |           |           |      |            |           |           |           |           |           |      |            |           |           |           |           |           |      |            |           |           |           |           |           |      |            |           |           |           |           |           |      |            |           |           |           |           |           |      |            |           |           |           |           |           |      |            |           |           |           |           |           |      |            |           |           |           |           |           |      |            |           |           |           |           |           |      |            |           |           |           |           |           |      |            |           |           |           |           |           |
|------|-----------|----------|----------|----------|----------|-----------|------|-----------|-----------|-----------|-----------|-----------|------------|------|------------|-----------|-----------|-----------|-----------|-----------|------|-----------|-----------|-----------|-----------|-----------|-----------|----|------------|-----------|-----------|-----------|-----------|-----------|------|------------|-----------|-----------|-----------|-----------|-----------|------|------------|-----------|-----------|-----------|-----------|-----------|------|------------|-----------|-----------|-----------|-----------|-----------|------|------------|-----------|-----------|-----------|-----------|-----------|------|------------|-----------|-----------|-----------|-----------|-----------|------|------------|-----------|-----------|-----------|-----------|-----------|------|------------|-----------|-----------|-----------|-----------|-----------|------|------------|-----------|-----------|-----------|-----------|-----------|------|------------|-----------|-----------|-----------|-----------|-----------|------|------------|-----------|-----------|-----------|-----------|-----------|------|------------|-----------|-----------|-----------|-----------|-----------|------|------------|-----------|-----------|-----------|-----------|-----------|------|------------|-----------|-----------|-----------|-----------|-----------|------|------------|-----------|-----------|-----------|-----------|-----------|------|------------|-----------|-----------|-----------|-----------|-----------|------|------------|-----------|-----------|-----------|-----------|-----------|------|------------|-----------|-----------|-----------|-----------|-----------|------|------------|-----------|-----------|-----------|-----------|-----------|------|------------|-----------|-----------|-----------|-----------|-----------|------|------------|-----------|-----------|-----------|-----------|-----------|------|------------|-----------|-----------|-----------|-----------|-----------|------|------------|-----------|-----------|-----------|-----------|-----------|------|------------|-----------|-----------|-----------|-----------|-----------|------|------------|-----------|-----------|-----------|-----------|-----------|------|------------|-----------|-----------|-----------|-----------|-----------|------|------------|-----------|-----------|-----------|-----------|-----------|------|------------|-----------|-----------|-----------|-----------|-----------|------|------------|-----------|-----------|-----------|-----------|-----------|------|------------|-----------|-----------|-----------|-----------|-----------|------|------------|-----------|-----------|-----------|-----------|-----------|
| 11.1 | -0.485003 | 0.462776 | 0.623236 | -0.31076 | 0.715843 | 0.4448372 | 25.1 | -0.479724 | 0.4480351 | 0.6101546 | -0.447979 | 0.6893304 | 0.13502123 | 51.9 | -0.4651271 | 0.3464911 | 0.6011872 | -0.496339 | 0.6489732 | 0.6069479 | 56.9 | -0.480299 | 0.4262579 | 0.5968284 | -0.267255 | 0.6257665 | 0.4028887 | 57 | -0.4811676 | 0.4262386 | 0.5971043 | -0.267991 | 0.6255331 | 0.4022286 | 57.1 | -0.4828209 | 0.4262054 | 0.5973123 | -0.272014 | 0.6254224 | 0.4025184 | 57.2 | -0.4828209 | 0.4262054 | 0.5973123 | -0.272014 | 0.6254224 | 0.4025184 | 57.3 | -0.4828209 | 0.4262054 | 0.5973123 | -0.272014 | 0.6254224 | 0.4025184 | 57.4 | -0.4828209 | 0.4262054 | 0.5973123 | -0.272014 | 0.6254224 | 0.4025184 | 57.5 | -0.4828209 | 0.4262054 | 0.5973123 | -0.272014 | 0.6254224 | 0.4025184 | 57.6 | -0.4828209 | 0.4262054 | 0.5973123 | -0.272014 | 0.6254224 | 0.4025184 | 57.7 | -0.4828209 | 0.4262054 | 0.5973123 | -0.272014 | 0.6254224 | 0.4025184 | 57.8 | -0.4828209 | 0.4262054 | 0.5973123 | -0.272014 | 0.6254224 | 0.4025184 | 57.9 | -0.4828209 | 0.4262054 | 0.5973123 | -0.272014 | 0.6254224 | 0.4025184 | 58.0 | -0.4828209 | 0.4262054 | 0.5973123 | -0.272014 | 0.6254224 | 0.4025184 | 58.1 | -0.4828209 | 0.4262054 | 0.5973123 | -0.272014 | 0.6254224 | 0.4025184 | 58.2 | -0.4828209 | 0.4262054 | 0.5973123 | -0.272014 | 0.6254224 | 0.4025184 | 58.3 | -0.4828209 | 0.4262054 | 0.5973123 | -0.272014 | 0.6254224 | 0.4025184 | 58.4 | -0.4828209 | 0.4262054 | 0.5973123 | -0.272014 | 0.6254224 | 0.4025184 | 58.5 | -0.4828209 | 0.4262054 | 0.5973123 | -0.272014 | 0.6254224 | 0.4025184 | 58.6 | -0.4828209 | 0.4262054 | 0.5973123 | -0.272014 | 0.6254224 | 0.4025184 | 58.7 | -0.4828209 | 0.4262054 | 0.5973123 | -0.272014 | 0.6254224 | 0.4025184 | 58.8 | -0.4828209 | 0.4262054 | 0.5973123 | -0.272014 | 0.6254224 | 0.4025184 | 58.9 | -0.4828209 | 0.4262054 | 0.5973123 | -0.272014 | 0.6254224 | 0.4025184 | 59.0 | -0.4828209 | 0.4262054 | 0.5973123 | -0.272014 | 0.6254224 | 0.4025184 | 59.1 | -0.4828209 | 0.4262054 | 0.5973123 | -0.272014 | 0.6254224 | 0.4025184 | 59.2 | -0.4828209 | 0.4262054 | 0.5973123 | -0.272014 | 0.6254224 | 0.4025184 | 59.3 | -0.4828209 | 0.4262054 | 0.5973123 | -0.272014 | 0.6254224 | 0.4025184 | 59.4 | -0.4828209 | 0.4262054 | 0.5973123 | -0.272014 | 0.6254224 | 0.4025184 | 59.5 | -0.4828209 | 0.4262054 | 0.5973123 | -0.272014 | 0.6254224 | 0.4025184 | 59.6 | -0.4828209 | 0.4262054 | 0.5973123 | -0.272014 | 0.6254224 | 0.4025184 | 59.7 | -0.4828209 | 0.4262054 | 0.5973123 | -0.272014 | 0.6254224 | 0.4025184 | 59.8 | -0.4828209 | 0.4262054 | 0.5973123 | -0.272014 | 0.6254224 | 0.4025184 | 59.9 | -0.4828209 | 0.4262054 | 0.5973123 | -0.272014 | 0.6254224 | 0.4025184 | 60.0 | -0.4828209 | 0.4262054 | 0.5973123 | -0.272014 | 0.6254224 | 0.4025184 |
|------|-----------|----------|----------|----------|----------|-----------|------|-----------|-----------|-----------|-----------|-----------|------------|------|------------|-----------|-----------|-----------|-----------|-----------|------|-----------|-----------|-----------|-----------|-----------|-----------|----|------------|-----------|-----------|-----------|-----------|-----------|------|------------|-----------|-----------|-----------|-----------|-----------|------|------------|-----------|-----------|-----------|-----------|-----------|------|------------|-----------|-----------|-----------|-----------|-----------|------|------------|-----------|-----------|-----------|-----------|-----------|------|------------|-----------|-----------|-----------|-----------|-----------|------|------------|-----------|-----------|-----------|-----------|-----------|------|------------|-----------|-----------|-----------|-----------|-----------|------|------------|-----------|-----------|-----------|-----------|-----------|------|------------|-----------|-----------|-----------|-----------|-----------|------|------------|-----------|-----------|-----------|-----------|-----------|------|------------|-----------|-----------|-----------|-----------|-----------|------|------------|-----------|-----------|-----------|-----------|-----------|------|------------|-----------|-----------|-----------|-----------|-----------|------|------------|-----------|-----------|-----------|-----------|-----------|------|------------|-----------|-----------|-----------|-----------|-----------|------|------------|-----------|-----------|-----------|-----------|-----------|------|------------|-----------|-----------|-----------|-----------|-----------|------|------------|-----------|-----------|-----------|-----------|-----------|------|------------|-----------|-----------|-----------|-----------|-----------|------|------------|-----------|-----------|-----------|-----------|-----------|------|------------|-----------|-----------|-----------|-----------|-----------|------|------------|-----------|-----------|-----------|-----------|-----------|------|------------|-----------|-----------|-----------|-----------|-----------|------|------------|-----------|-----------|-----------|-----------|-----------|------|------------|-----------|-----------|-----------|-----------|-----------|------|------------|-----------|-----------|-----------|-----------|-----------|------|------------|-----------|-----------|-----------|-----------|-----------|------|------------|-----------|-----------|-----------|-----------|-----------|------|------------|-----------|-----------|-----------|-----------|-----------|------|------------|-----------|-----------|-----------|-----------|-----------|

|      |            |            |            |            |            |            |      |            |            |            |            |            |            |       |            |            |            |           |            |            |       |            |            |           |            |            |           |
|------|------------|------------|------------|------------|------------|------------|------|------------|------------|------------|------------|------------|------------|-------|------------|------------|------------|-----------|------------|------------|-------|------------|------------|-----------|------------|------------|-----------|
| 69   | -0.442497  | 0.40655075 | 0.5851967  | 0.561719   | 0.60165603 | 0.4052196  | 84.1 | -0.42972   | 0.39489602 | 0.58012526 | -0.5471328 | 0.58421146 | 0.0365237  | 99.1  | -0.4296974 | 0.39968932 | 0.57841121 | 0.5529178 | 0.58007764 | 0.02807669 | 114.1 | -0.4111393 | 0.40210769 | 0.5766735 | -0.5571269 | 0.57381733 | 0.0269360 |
| 69.1 | -0.4423057 | 0.40633756 | 0.58498983 | 0.563312   | 0.60144276 | 0.4073781  | 84.2 | -0.42972   | 0.39489602 | 0.58012526 | -0.5471328 | 0.58421146 | 0.0365237  | 99.2  | -0.4296974 | 0.39968932 | 0.57841121 | 0.5529178 | 0.58007764 | 0.02807669 | 114.2 | -0.4111393 | 0.40210769 | 0.5766735 | -0.5571269 | 0.57381733 | 0.0269360 |
| 69.2 | -0.4416607 | 0.40606595 | 0.5849163  | 0.5638602  | 0.60097401 | 0.4052196  | 84.3 | -0.42972   | 0.39489602 | 0.58012526 | -0.5471328 | 0.58421146 | 0.0365237  | 99.3  | -0.4296974 | 0.39968932 | 0.57841121 | 0.5529178 | 0.58007764 | 0.02807669 | 114.3 | -0.4109446 | 0.40216864 | 0.5763825 | -0.5569972 | 0.57366399 | 0.0265774 |
| 69.3 | -0.4412438 | 0.40547548 | 0.5848089  | 0.5635568  | 0.60065742 | 0.4048262  | 84.4 | -0.4296923 | 0.3948766  | 0.57975489 | -0.5470487 | 0.58450157 | 0.0323626  | 99.4  | -0.4296974 | 0.39968932 | 0.57841121 | 0.5529178 | 0.58007764 | 0.02807669 | 114.4 | -0.4109446 | 0.40216864 | 0.5763825 | -0.5569972 | 0.57366399 | 0.0265774 |
| 69.4 | -0.4411207 | 0.40544783 | 0.5848456  | 0.5635724  | 0.60038075 | 0.4045892  | 84.5 | -0.4296923 | 0.3948766  | 0.57975489 | -0.5471252 | 0.5842625  | 0.0321728  | 99.5  | -0.4296974 | 0.39968932 | 0.57841121 | 0.5529178 | 0.58007764 | 0.02807669 | 114.5 | -0.4109446 | 0.40216864 | 0.5763825 | -0.5569972 | 0.57366399 | 0.0265774 |
| 69.5 | -0.4411217 | 0.40544783 | 0.5848456  | 0.5635724  | 0.60038075 | 0.4045892  | 84.6 | -0.4301555 | 0.39601346 | 0.57972195 | -0.5473285 | 0.58460342 | 0.0321029  | 99.6  | -0.4296974 | 0.39968932 | 0.57841121 | 0.5529178 | 0.58007764 | 0.02807669 | 114.6 | -0.4109446 | 0.40216864 | 0.5763825 | -0.5569972 | 0.57366399 | 0.0265774 |
| 69.6 | -0.4412176 | 0.40544502 | 0.5847291  | 0.5637094  | 0.60036319 | 0.4046029  | 84.7 | -0.4301555 | 0.39601346 | 0.57972195 | -0.5473285 | 0.58460342 | 0.0321029  | 99.7  | -0.4297378 | 0.39969034 | 0.57841121 | 0.5528999 | 0.57975791 | 0.02807849 | 114.7 | -0.4109208 | 0.40227964 | 0.5761851 | -0.5572721 | 0.5733866  | 0.0262969 |
| 69.7 | -0.4412176 | 0.40544502 | 0.5847291  | 0.5637094  | 0.60036319 | 0.4046029  | 84.8 | -0.4301318 | 0.39576816 | 0.57955377 | -0.5475418 | 0.58458409 | 0.0321089  | 99.8  | -0.4297378 | 0.39969034 | 0.57841121 | 0.5528999 | 0.57975791 | 0.02807849 | 114.8 | -0.4109208 | 0.40227964 | 0.5761851 | -0.5572721 | 0.5733866  | 0.0262969 |
| 69.8 | -0.4412176 | 0.40544502 | 0.5847291  | 0.5637094  | 0.60036319 | 0.4046029  | 84.9 | -0.4301318 | 0.39576816 | 0.57955377 | -0.5475418 | 0.58458409 | 0.0321089  | 99.9  | -0.4297378 | 0.39969034 | 0.57841121 | 0.5528999 | 0.57975791 | 0.02807849 | 114.9 | -0.4109208 | 0.40227964 | 0.5761851 | -0.5572721 | 0.5733866  | 0.0262969 |
| 69.9 | -0.4405888 | 0.40437575 | 0.5847575  | 0.5637474  | 0.59924711 | 0.4040129  | 85.0 | -0.4301318 | 0.39576816 | 0.57955377 | -0.5475418 | 0.58458409 | 0.0321089  | 100   | -0.4301619 | 0.39971401 | 0.578323   | 0.5529525 | 0.57984088 | 0.02804267 | 115.0 | -0.4109446 | 0.40216864 | 0.5763825 | -0.5569972 | 0.57366399 | 0.0265774 |
| 70.1 | -0.440239  | 0.40407983 | 0.5842925  | 0.5637712  | 0.59942288 | 0.03968831 | 85.1 | -0.4301318 | 0.39576816 | 0.57955377 | -0.5475418 | 0.58458409 | 0.0321089  | 100.1 | -0.4301619 | 0.39971401 | 0.578323   | 0.5529525 | 0.57984088 | 0.02804267 | 115.1 | -0.4109446 | 0.40216864 | 0.5763825 | -0.5569972 | 0.57366399 | 0.0265774 |
| 70.2 | -0.440239  | 0.40407983 | 0.5842925  | 0.5637712  | 0.59942288 | 0.03968831 | 85.2 | -0.4299408 | 0.39602242 | 0.57934229 | -0.5475423 | 0.58458485 | 0.0320566  | 100.2 | -0.4301619 | 0.39971401 | 0.578323   | 0.5529525 | 0.57984088 | 0.02804267 | 115.2 | -0.4109446 | 0.40216864 | 0.5763825 | -0.5569972 | 0.57366399 | 0.0265774 |
| 70.3 | -0.4397502 | 0.40412651 | 0.5845834  | 0.5637712  | 0.59894954 | 0.03918203 | 85.3 | -0.4299408 | 0.39602242 | 0.57934229 | -0.5475423 | 0.58458485 | 0.0320566  | 100.3 | -0.4301619 | 0.39971401 | 0.578323   | 0.5529525 | 0.57984088 | 0.02804267 | 115.3 | -0.4109446 | 0.40216864 | 0.5763825 | -0.5569972 | 0.57366399 | 0.0265774 |
| 70.4 | -0.4400658 | 0.40414704 | 0.5842420  | 0.56398304 | 0.59847662 | 0.0389956  | 85.4 | -0.4299408 | 0.39602242 | 0.57934229 | -0.5475423 | 0.58458485 | 0.0320566  | 100.4 | -0.4301619 | 0.39971401 | 0.578323   | 0.5529525 | 0.57984088 | 0.02804267 | 115.4 | -0.4109446 | 0.40216864 | 0.5763825 | -0.5569972 | 0.57366399 | 0.0265774 |
| 70.5 | -0.4398316 | 0.40381001 | 0.5842470  | 0.56390681 | 0.59813845 | 0.0391871  | 85.5 | -0.4299408 | 0.39602242 | 0.57934229 | -0.5475423 | 0.58458485 | 0.0320566  | 100.5 | -0.4301619 | 0.39971401 | 0.578323   | 0.5529525 | 0.57984088 | 0.02804267 | 115.5 | -0.4109446 | 0.40216864 | 0.5763825 | -0.5569972 | 0.57366399 | 0.0265774 |
| 70.6 | -0.4398316 | 0.40381001 | 0.5842470  | 0.56390681 | 0.59813845 | 0.0391871  | 85.6 | -0.4299408 | 0.39602242 | 0.57934229 | -0.5475423 | 0.58458485 | 0.0320566  | 100.6 | -0.4301619 | 0.39971401 | 0.578323   | 0.5529525 | 0.57984088 | 0.02804267 | 115.6 | -0.4109446 | 0.40216864 | 0.5763825 | -0.5569972 | 0.57366399 | 0.0265774 |
| 70.7 | -0.4398316 | 0.40381001 | 0.5842470  | 0.56390681 | 0.59813845 | 0.0391871  | 85.7 | -0.4302233 | 0.39600907 | 0.57950664 | -0.5478126 | 0.58461818 | 0.0317908  | 100.7 | -0.4301619 | 0.39971401 | 0.578323   | 0.5529525 | 0.57984088 | 0.02804267 | 115.7 | -0.4109446 | 0.40216864 | 0.5763825 | -0.5569972 | 0.57366399 | 0.0265774 |
| 70.8 | -0.4397202 | 0.40373203 | 0.5840936  | 0.56398986 | 0.59771833 | 0.0391927  | 85.8 | -0.4302233 | 0.39600907 | 0.57950664 | -0.5478126 | 0.58461818 | 0.0317908  | 100.8 | -0.4301619 | 0.39971401 | 0.578323   | 0.5529525 | 0.57984088 | 0.02804267 | 115.8 | -0.4109446 | 0.40216864 | 0.5763825 | -0.5569972 | 0.57366399 | 0.0265774 |
| 70.9 | -0.4396345 | 0.40316955 | 0.5839496  | 0.5639248  | 0.59731665 | 0.03898234 | 85.9 | -0.4302233 | 0.39600907 | 0.57950664 | -0.5478126 | 0.58461818 | 0.0317908  | 100.9 | -0.4301619 | 0.39971401 | 0.578323   | 0.5529525 | 0.57984088 | 0.02804267 | 115.9 | -0.4109446 | 0.40216864 | 0.5763825 | -0.5569972 | 0.57366399 | 0.0265774 |
| 71.1 | -0.4391394 | 0.40283283 | 0.5839364  | 0.5639462  | 0.59746528 | 0.03875661 | 86.0 | -0.4301071 | 0.39629137 | 0.57941056 | -0.5481243 | 0.58374613 | 0.03134041 | 101.0 | -0.4301619 | 0.39971401 | 0.578323   | 0.5529525 | 0.57984088 | 0.02804267 | 116.0 | -0.4109446 | 0.40216864 | 0.5763825 | -0.5569972 | 0.57366399 | 0.0265774 |
| 71.2 | -0.4389551 | 0.4022786  | 0.5840715  | 0.5639591  | 0.59780689 | 0.0388081  | 86.1 | -0.4301071 | 0.39629137 | 0.57941056 | -0.5481243 | 0.58374613 | 0.03134041 | 101.1 | -0.4301619 | 0.39971401 | 0.578323   | 0.5529525 | 0.57984088 | 0.02804267 | 116.1 | -0.4109446 | 0.40216864 | 0.5763825 | -0.5569972 | 0.57366399 | 0.0265774 |
| 71.3 | -0.4389551 | 0.4022786  | 0.5840715  | 0.5639591  | 0.59780689 | 0.0388081  | 86.2 | -0.4301515 | 0.39634496 | 0.5794542  | -0.5481496 | 0.5837373  | 0.03147072 | 101.2 | -0.4301619 | 0.39971401 | 0.578323   | 0.5529525 | 0.57984088 | 0.02804267 | 116.2 | -0.4109446 | 0.40216864 | 0.5763825 | -0.5569972 | 0.57366399 | 0.0265774 |
| 71.4 | -0.4389551 | 0.4022786  | 0.5840715  | 0.5639591  | 0.59780689 | 0.0388081  | 86.3 | -0.4301515 | 0.39634496 | 0.5794542  | -0.5481496 | 0.5837373  | 0.03147072 | 101.3 | -0.4301619 | 0.39971401 | 0.578323   | 0.5529525 | 0.57984088 | 0.02804267 | 116.3 | -0.4109446 | 0.40216864 | 0.5763825 | -0.5569972 | 0.57366399 | 0.0265774 |
| 71.5 | -0.4389551 | 0.4022786  | 0.5840715  | 0.5639591  | 0.59780689 | 0.0388081  | 86.4 | -0.4301515 | 0.39634496 | 0.5794542  | -0.5481496 | 0.5837373  | 0.03147072 | 101.4 | -0.4301619 | 0.39971401 | 0.578323   | 0.5529525 | 0.57984088 | 0.02804267 | 116.4 | -0.4109446 | 0.40216864 | 0.5763825 | -0.5569972 | 0.57366399 | 0.0265774 |
| 71.6 | -0.4389551 | 0.4022786  | 0.5840715  | 0.5639591  | 0.59780689 | 0.0388081  | 86.5 | -0.4301515 | 0.39634496 | 0.5794542  | -0.5481496 | 0.5837373  | 0.03147072 | 101.5 | -0.4301619 | 0.39971401 | 0.578323   | 0.5529525 | 0.57984088 | 0.02804267 | 116.5 | -0.4109446 | 0.40216864 | 0.5763825 | -0.5569972 | 0.57366399 | 0.0265774 |
| 71.7 | -0.4389551 | 0.4022786  | 0.5840715  | 0.5639591  | 0.59780689 | 0.0388081  | 86.6 | -0.4301515 | 0.39634496 | 0.5794542  | -0.5481496 | 0.5837373  | 0.03147072 | 101.6 | -0.4301619 | 0.39971401 | 0.578323   | 0.5529525 | 0.57984088 | 0.02804267 | 116.6 | -0.4109446 | 0.40216864 | 0.5763825 | -0.5569972 | 0.57366399 | 0.0265774 |
| 71.8 | -0.4389551 | 0.4022786  | 0.5840715  | 0.5639591  | 0.59780689 | 0.0388081  | 86.7 | -0.4301515 | 0.39634496 | 0.5794542  | -0.5481496 | 0.5837373  | 0.03147072 | 101.7 | -0.4301619 | 0.39971401 | 0.578323   | 0.5529525 | 0.57984088 | 0.02804267 | 116.7 | -0.4109446 | 0.40216864 | 0.5763825 | -0.5569972 | 0.57366399 | 0.0265774 |
| 71.9 | -0.4389551 | 0.4022786  | 0.5840715  | 0.5639591  | 0.59780689 | 0.0388081  | 86.8 | -0.4301515 | 0.39634496 | 0.5794542  | -0.5481496 | 0.5837373  | 0.03147072 | 101.8 | -0.4301619 | 0.39971401 | 0.578323   | 0.5529525 | 0.57984088 | 0.02804267 | 116.8 | -0.4109446 | 0.40216864 | 0.5763825 | -0.5569972 | 0.57366399 | 0.0265774 |
| 72.1 | -0.4373201 | 0.4023234  | 0.5841824  | 0.5639865  | 0.59653719 | 0.0391249  | 86.9 | -0.4301515 | 0.39634496 | 0.5794542  | -0.5481496 | 0.5837373  | 0.03147072 | 101.9 | -0.4301619 | 0.39971401 | 0.578323   | 0.5529525 | 0.57984088 | 0.02804267 | 116.9 | -0.4109446 | 0.40216864 | 0.5763825 | -0.5569972 | 0.57366399 | 0.0265774 |
| 72.2 | -0.4373201 | 0.4023234  | 0.5841824  | 0.5639865  | 0.59653719 | 0.0391249  | 87.0 | -0.4301515 | 0.39634496 | 0.5794542  | -0.5481496 | 0.5837373  | 0.03147072 | 102.0 | -0.4301619 | 0.39971401 | 0.578323   | 0.5529525 | 0.57984088 | 0.02804267 | 117.0 | -0.4109446 | 0.40216864 | 0.5763825 | -0.5569972 | 0.57366399 | 0.0265774 |
| 72.3 | -0.4373201 | 0.4023234  | 0.5841824  | 0.5639865  | 0.59653719 | 0.0391249  | 87.1 | -0.4301515 | 0.39634496 | 0.5794542  | -0.5481496 | 0.5837373  | 0.03147072 | 102.1 | -0.4301619 | 0.39971401 | 0.578323   | 0.5529525 | 0.57984088 | 0.02804267 | 117.1 | -0.4109446 | 0.40216864 | 0.5763825 | -0.5569972 | 0.57366399 | 0.0265774 |
| 72.4 | -0.4373201 | 0.4023234  | 0.5841824  | 0.5639865  | 0.59653719 | 0.0391249  | 87.2 | -0.4301515 | 0.39634496 | 0.5794542  | -0.5481496 | 0.5837373  | 0.03147072 | 102.2 | -0.4301619 | 0.39971401 | 0.578323   | 0.5529525 | 0.57984088 | 0.02804267 | 117.2 | -0.4109446 | 0.40216864 | 0.5763825 | -0.5569972 | 0.57366399 | 0.0       |







|      |           |          |          |          |          |            |      |          |          |          |          |          |             |      |          |          |          |          |          |            |       |          |          |          |          |          |            |
|------|-----------|----------|----------|----------|----------|------------|------|----------|----------|----------|----------|----------|-------------|------|----------|----------|----------|----------|----------|------------|-------|----------|----------|----------|----------|----------|------------|
| 119  | 1.699E-11 | 2.38E-10 | 2.94E-10 | 4.01E-05 | 8.15E-28 | 1.41E-09   | 26.9 | 4.13E-11 | 9.28E-10 | 1.26E-18 | 1.01E-09 | 3.71E-25 | 0.08070125  | 41.9 | 1.88E-10 | 2.99E-09 | 4.99E-18 | 6.62E-12 | 1.40E-21 | 0.43118435 | 56.9  | 3.81E-10 | 7.65E-09 | 1.07E-17 | 1.90E-13 | 9.44E-20 | 0.57808054 |
| 120  | 1.95E-11  | 2.22E-10 | 2.42E-10 | 4.01E-05 | 8.15E-28 | 1.41E-09   | 27.0 | 4.32E-11 | 1.01E-09 | 1.27E-18 | 9.90E-10 | 3.75E-25 | 0.08237971  | 42   | 1.88E-10 | 2.99E-09 | 4.99E-18 | 6.62E-12 | 1.40E-21 | 0.43118435 | 57    | 3.78E-10 | 7.65E-09 | 1.05E-17 | 1.88E-13 | 9.72E-20 | 0.58039063 |
| 121  | 1.71E-11  | 2.42E-10 | 2.94E-10 | 3.85E-05 | 6.98E-28 | 2.66E-09   | 27.1 | 4.81E-11 | 1.03E-09 | 1.38E-18 | 1.17E-10 | 4.34E-25 | 0.0867731   | 42.1 | 1.96E-10 | 3.19E-09 | 5.59E-18 | 6.94E-12 | 1.62E-21 | 0.4359844  | 57.1  | 3.74E-10 | 7.55E-09 | 1.02E-17 | 1.83E-13 | 9.91E-20 | 0.58307945 |
| 122  | 2.10E-11  | 2.24E-10 | 2.81E-10 | 3.54E-05 | 6.61E-28 | 3.49E-09   | 27.2 | 4.78E-11 | 1.03E-09 | 1.48E-18 | 9.47E-10 | 4.27E-25 | 0.08848293  | 42.2 | 2.08E-10 | 3.14E-09 | 5.59E-18 | 6.63E-12 | 1.74E-21 | 0.43847305 | 57.2  | 3.64E-10 | 7.55E-09 | 1.02E-17 | 1.83E-13 | 9.91E-20 | 0.58307945 |
| 123  | 1.91E-11  | 2.49E-10 | 2.92E-10 | 3.63E-05 | 6.81E-28 | 3.51E-09   | 27.3 | 4.77E-11 | 1.12E-09 | 1.52E-18 | 9.01E-10 | 4.59E-25 | 0.09090269  | 42.3 | 2.01E-10 | 3.49E-09 | 5.79E-18 | 6.28E-12 | 1.85E-21 | 0.44021406 | 57.3  | 3.79E-10 | 7.68E-09 | 1.05E-17 | 1.79E-13 | 1.06E-19 | 0.57795856 |
| 124  | 1.64E-11  | 2.41E-10 | 2.82E-10 | 3.54E-05 | 5.97E-28 | 3.65E-09   | 27.4 | 4.63E-11 | 1.14E-09 | 1.61E-18 | 9.01E-10 | 4.75E-25 | 0.09338885  | 42.4 | 2.06E-10 | 3.47E-09 | 5.75E-18 | 6.58E-12 | 1.85E-21 | 0.44073306 | 57.4  | 3.76E-10 | 7.76E-09 | 1.05E-17 | 1.65E-13 | 1.11E-19 | 0.58237563 |
| 125  | 1.74E-11  | 2.35E-10 | 2.92E-10 | 3.19E-05 | 6.04E-28 | 3.97E-09   | 27.5 | 4.37E-11 | 1.09E-09 | 1.64E-18 | 7.50E-10 | 5.04E-25 | 0.09690953  | 42.5 | 2.07E-10 | 3.47E-09 | 5.86E-18 | 6.67E-12 | 2.03E-21 | 0.44273505 | 57.5  | 3.81E-10 | 7.95E-09 | 1.05E-17 | 1.68E-13 | 1.11E-19 | 0.58416633 |
| 126  | 1.89E-11  | 2.22E-10 | 1.83E-10 | 3.18E-05 | 4.97E-28 | 1.25E-08   | 27.6 | 4.76E-11 | 1.23E-09 | 1.68E-18 | 6.99E-10 | 5.85E-25 | 0.09797479  | 42.6 | 2.04E-10 | 3.49E-09 | 6.15E-18 | 6.45E-12 | 2.14E-21 | 0.44375025 | 57.6  | 3.99E-10 | 8.10E-09 | 1.07E-17 | 1.63E-13 | 1.14E-19 | 0.58178173 |
| 127  | 1.71E-11  | 1.44E-10 | 1.48E-10 | 2.88E-05 | 1.61E-28 | 1.61E-08   | 27.7 | 4.69E-11 | 1.26E-09 | 1.64E-18 | 5.86E-10 | 6.20E-25 | 0.09901481  | 42.7 | 2.03E-10 | 3.50E-09 | 6.24E-18 | 6.57E-12 | 2.18E-21 | 0.44484359 | 57.7  | 4.02E-10 | 8.30E-09 | 1.13E-17 | 1.65E-13 | 1.16E-19 | 0.58195689 |
| 128  | 1.48E-11  | 2.03E-10 | 1.76E-10 | 2.71E-05 | 3.48E-28 | 2.44E-08   | 27.8 | 4.66E-11 | 1.13E-09 | 1.56E-18 | 5.23E-10 | 6.28E-25 | 0.09985471  | 42.8 | 2.04E-10 | 3.49E-09 | 6.44E-18 | 6.55E-12 | 2.44E-21 | 0.44575205 | 57.8  | 4.14E-10 | 8.11E-09 | 1.15E-17 | 1.69E-13 | 1.14E-19 | 0.58453232 |
| 129  | 1.48E-11  | 2.04E-10 | 1.89E-10 | 2.57E-05 | 2.93E-28 | 3.90E-08   | 27.9 | 4.80E-11 | 1.22E-09 | 1.58E-18 | 5.11E-10 | 6.89E-25 | 0.09832411  | 42.9 | 2.25E-10 | 3.60E-09 | 6.44E-18 | 6.50E-12 | 2.40E-21 | 0.4453105  | 57.9  | 4.14E-10 | 8.11E-09 | 1.15E-17 | 1.69E-13 | 1.14E-19 | 0.58453232 |
| 130  | 1.50E-11  | 1.97E-10 | 1.88E-10 | 2.34E-05 | 2.55E-28 | 4.88E-08   | 28   | 5.00E-11 | 1.21E-09 | 1.67E-18 | 5.00E-10 | 7.40E-25 | 0.10148831  | 43   | 2.26E-10 | 3.64E-09 | 6.51E-18 | 6.30E-12 | 2.49E-21 | 0.45023279 | 58    | 4.19E-10 | 7.96E-09 | 1.17E-17 | 1.63E-13 | 1.20E-19 | 0.58597239 |
| 131  | 1.30E-11  | 1.81E-10 | 2.02E-10 | 2.19E-05 | 2.75E-28 | 6.70E-08   | 28.1 | 5.17E-11 | 1.24E-09 | 1.58E-18 | 4.81E-10 | 7.84E-25 | 0.10316502  | 43.1 | 2.19E-10 | 3.57E-09 | 6.30E-18 | 6.50E-12 | 2.45E-21 | 0.45059878 | 58.1  | 4.14E-10 | 7.84E-09 | 1.15E-17 | 1.62E-13 | 1.19E-19 | 0.58585507 |
| 132  | 1.08E-11  | 1.59E-10 | 1.76E-10 | 1.86E-05 | 2.32E-28 | 9.07E-08   | 28.2 | 5.17E-11 | 1.33E-09 | 1.88E-18 | 4.77E-10 | 8.58E-25 | 0.10328169  | 43.2 | 2.25E-10 | 3.56E-09 | 6.62E-18 | 6.41E-12 | 2.46E-21 | 0.45187523 | 58.2  | 4.23E-10 | 8.22E-09 | 1.16E-17 | 1.55E-13 | 1.24E-19 | 0.58423388 |
| 133  | 1.02E-11  | 1.41E-10 | 1.62E-10 | 1.59E-05 | 2.21E-28 | 1.44E-07   | 28.3 | 5.33E-11 | 1.31E-09 | 1.86E-18 | 4.44E-10 | 9.06E-25 | 0.1032316   | 43.3 | 2.25E-10 | 3.63E-09 | 6.79E-18 | 6.47E-12 | 2.49E-21 | 0.45695132 | 58.3  | 4.23E-10 | 8.42E-09 | 1.18E-17 | 1.45E-13 | 1.40E-19 | 0.58703137 |
| 134  | 1.21E-11  | 1.62E-10 | 1.46E-10 | 1.59E-05 | 2.05E-28 | 1.90E-07   | 28.4 | 4.95E-11 | 1.26E-09 | 1.77E-18 | 4.10E-10 | 9.95E-25 | 0.1010982   | 43.4 | 2.26E-10 | 3.61E-09 | 6.51E-18 | 6.11E-12 | 2.39E-21 | 0.4609417  | 58.4  | 4.48E-10 | 8.77E-09 | 1.16E-17 | 1.42E-13 | 1.52E-19 | 0.58682884 |
| 135  | 8.60E-12  | 1.29E-10 | 1.20E-10 | 1.20E-05 | 2.25E-28 | 2.44E-07   | 28.5 | 4.88E-11 | 1.21E-09 | 1.74E-18 | 3.93E-10 | 9.68E-25 | 0.1015056   | 43.5 | 2.26E-10 | 3.61E-09 | 6.51E-18 | 6.11E-12 | 2.39E-21 | 0.4609417  | 58.5  | 4.61E-10 | 8.68E-09 | 1.20E-17 | 1.47E-13 | 1.56E-19 | 0.58837275 |
| 136  | 8.86E-12  | 1.29E-10 | 1.37E-10 | 1.17E-05 | 2.28E-28 | 3.17E-07   | 28.6 | 5.34E-11 | 1.39E-09 | 1.98E-18 | 3.76E-10 | 1.35E-24 | 0.101403793 | 43.6 | 2.32E-10 | 3.63E-09 | 7.09E-18 | 6.35E-12 | 2.46E-21 | 0.47146997 | 58.6  | 4.61E-10 | 8.68E-09 | 1.20E-17 | 1.47E-13 | 1.56E-19 | 0.58837275 |
| 137  | 7.05E-12  | 1.25E-10 | 1.01E-10 | 1.01E-05 | 2.12E-28 | 3.69E-07   | 28.7 | 5.41E-11 | 1.49E-09 | 1.99E-18 | 3.52E-10 | 1.39E-24 | 0.11330805  | 43.7 | 2.34E-10 | 3.66E-09 | 7.25E-18 | 6.62E-12 | 2.45E-21 | 0.47077243 | 58.7  | 4.80E-10 | 8.67E-09 | 1.18E-17 | 1.46E-13 | 1.59E-19 | 0.58804006 |
| 138  | 6.92E-12  | 1.24E-10 | 1.13E-10 | 1.02E-05 | 1.87E-28 | 4.62E-07   | 28.8 | 5.61E-11 | 1.58E-09 | 2.08E-18 | 3.42E-10 | 1.62E-24 | 0.11653139  | 43.8 | 2.31E-10 | 3.66E-09 | 7.44E-18 | 6.34E-12 | 2.43E-21 | 0.46851135 | 58.8  | 4.81E-10 | 9.00E-09 | 1.16E-17 | 1.47E-13 | 1.62E-19 | 0.58824384 |
| 139  | 5.49E-12  | 1.11E-10 | 1.48E-10 | 1.04E-05 | 1.82E-28 | 5.82E-07   | 28.9 | 5.22E-11 | 1.55E-09 | 1.90E-18 | 3.48E-10 | 1.59E-24 | 0.11835673  | 43.9 | 2.46E-10 | 3.66E-09 | 7.05E-18 | 6.30E-12 | 2.63E-21 | 0.47392525 | 58.9  | 4.81E-10 | 9.00E-09 | 1.16E-17 | 1.47E-13 | 1.62E-19 | 0.58824384 |
| 140  | 5.25E-12  | 1.02E-10 | 1.50E-10 | 9.13E-06 | 1.89E-28 | 8.09E-07   | 29   | 5.25E-11 | 1.54E-09 | 1.82E-18 | 3.31E-10 | 1.79E-24 | 0.12274282  | 44   | 2.49E-10 | 3.68E-09 | 7.03E-18 | 6.31E-12 | 2.61E-21 | 0.4774125  | 59    | 4.97E-10 | 9.24E-09 | 1.15E-17 | 1.48E-13 | 1.65E-19 | 0.58579605 |
| 141  | 4.92E-12  | 1.14E-10 | 1.47E-10 | 9.63E-06 | 2.03E-28 | 1.01E-06   | 29.1 | 5.24E-11 | 1.54E-09 | 1.82E-18 | 3.14E-10 | 1.91E-24 | 0.12577255  | 44.1 | 2.44E-10 | 3.70E-09 | 6.97E-18 | 6.36E-12 | 2.65E-21 | 0.48101025 | 59.1  | 5.02E-10 | 9.49E-09 | 1.12E-17 | 1.49E-13 | 1.64E-19 | 0.58719751 |
| 142  | 4.79E-12  | 9.65E-11 | 1.62E-10 | 8.14E-06 | 1.76E-28 | 1.21E-06   | 29.2 | 5.25E-11 | 1.49E-09 | 1.89E-18 | 2.87E-10 | 2.06E-24 | 0.12830794  | 44.2 | 2.51E-10 | 3.65E-09 | 6.94E-18 | 6.35E-12 | 2.81E-21 | 0.47928688 | 59.2  | 5.08E-10 | 8.81E-09 | 1.11E-17 | 1.50E-13 | 1.65E-19 | 0.5966601  |
| 143  | 5.12E-12  | 8.85E-11 | 1.42E-10 | 7.70E-06 | 1.82E-28 | 1.37E-06   | 29.3 | 5.52E-11 | 1.70E-09 | 1.99E-18 | 2.36E-10 | 2.66E-24 | 0.13154266  | 44.3 | 2.64E-10 | 3.94E-09 | 7.16E-18 | 6.35E-12 | 2.96E-21 | 0.47956243 | 59.3  | 5.08E-10 | 8.81E-09 | 1.11E-17 | 1.50E-13 | 1.65E-19 | 0.5966601  |
| 144  | 4.97E-12  | 9.65E-11 | 1.34E-10 | 7.50E-06 | 1.22E-28 | 2.35E-06   | 29.5 | 6.99E-11 | 1.86E-09 | 2.02E-18 | 2.20E-10 | 3.25E-24 | 0.1311002   | 44.5 | 2.60E-10 | 3.90E-09 | 7.20E-18 | 6.26E-12 | 3.01E-21 | 0.48582573 | 59.5  | 5.02E-10 | 9.07E-09 | 1.14E-17 | 1.50E-13 | 1.69E-19 | 0.5937112  |
| 146  | 5.88E-12  | 9.07E-11 | 1.58E-10 | 6.97E-06 | 2.05E-28 | 2.70E-06   | 29.6 | 6.99E-11 | 2.04E-09 | 2.05E-18 | 2.06E-10 | 3.63E-24 | 0.1314162   | 44.6 | 2.62E-10 | 3.87E-09 | 7.28E-18 | 6.28E-12 | 3.52E-21 | 0.4783953  | 59.6  | 5.12E-10 | 9.07E-09 | 1.14E-17 | 1.50E-13 | 1.69E-19 | 0.5937112  |
| 148  | 5.05E-12  | 9.75E-11 | 1.15E-10 | 6.25E-06 | 1.63E-28 | 3.56E-06   | 29.7 | 6.77E-11 | 2.02E-09 | 2.10E-18 | 1.92E-10 | 3.75E-24 | 0.13130805  | 44.7 | 2.72E-10 | 3.84E-09 | 7.40E-18 | 6.27E-12 | 3.62E-21 | 0.4761297  | 59.8  | 5.04E-10 | 9.07E-09 | 1.14E-17 | 1.47E-13 | 1.84E-19 | 0.59659479 |
| 149  | 4.95E-12  | 8.89E-11 | 1.19E-10 | 4.70E-06 | 1.67E-28 | 4.54E-06   | 29.8 | 7.67E-11 | 2.04E-09 | 2.36E-18 | 1.63E-10 | 4.72E-24 | 0.1343200   | 44.9 | 2.83E-10 | 4.17E-09 | 7.95E-18 | 6.26E-12 | 3.66E-21 | 0.47535274 | 59.9  | 5.39E-10 | 9.09E-09 | 1.12E-17 | 1.41E-13 | 1.88E-19 | 0.59623127 |
| 60   | 5.29E-10  | 9.53E-09 | 3.07E-10 | 1.40E-13 | 2.02E-19 | 0.59862431 | 75   | 3.67E-09 | 8.33E-08 | 8.90E-17 | 2.75E-14 | 2.25E-17 | 0.62848206  | 90   | 5.19E-09 | 9.30E-08 | 1.63E-16 | 1.04E-14 | 1.01E-16 | 0.69593929 | 105   | 4.71E-09 | 6.33E-08 | 1.88E-16 | 4.29E-14 | 1.94E-16 | 0.72062921 |
| 60.1 | 5.11E-10  | 9.81E-09 | 3.17E-10 | 1.41E-13 | 2.05E-19 | 0.59902645 | 75.1 | 3.67E-09 | 8.33E-08 | 9.00E-17 | 2.75E-14 | 2.25E-17 | 0.62848206  | 90.1 | 5.19E-09 | 9.30E-08 | 1.63E-16 | 1.04E-14 | 1.01E-16 | 0.69593929 | 105.1 | 4.71E-09 | 6.33E-08 | 1.88E-16 | 4.29E-14 | 1.94E-16 | 0.72062921 |
| 60.2 | 5.14E-10  | 1.01E-08 | 1.29E-10 | 1.36E-13 | 2.14E-19 | 0.59901265 | 75.2 | 3.67E-09 | 8.33E-08 | 9.00E-17 | 2.75E-14 | 2.25E-17 | 0.62848206  | 90.2 | 5.19E-09 | 9.30E-08 | 1.63E-16 | 1.04E-14 | 1.01E-16 | 0.69593929 | 105.2 | 4.71E-09 | 6.33E-08 | 1.88E-16 | 4.29E-14 | 1.94E-16 | 0.72062921 |
| 60.3 | 5.14E-10  | 1.01E-08 | 1.29E-10 | 1.36E-13 | 2.14E-19 | 0.59901265 | 75.3 | 3.67E-09 | 8.33E-08 | 9.00E-17 | 2.75E-14 | 2.25E-17 | 0.62848206  | 90.3 | 5.19E-09 | 9.30E-08 | 1.63E-16 | 1.04E-14 | 1.01E-16 | 0.69593929 | 105.3 | 4.71E-09 | 6.33E-08 | 1.88E-16 | 4.29E-14 | 1.94E-16 | 0.72062921 |
| 60.4 | 5.29E-10  | 1.03E-08 | 1.32E-10 | 1.35E-13 | 2.28E-19 | 0.59697527 | 75.4 | 3.76E-09 | 8.62E-08 | 9.88E-17 | 2.65E-14 | 2.53E-17 | 0.62373075  | 90.4 | 5.19E-09 | 9.30E-08 | 1.63E-16 | 1.04E-14 | 1.01E-16 | 0.69593929 | 105.4 | 4.86E-09 | 6.43E-08 | 1.95E-16 | 4.30E-14 | 2.09E-16 | 0.71903899 |
| 60.5 | 5.47E-10  | 1.02E-08 | 1.34E-10 | 1.36E-13 | 2.31E-19 | 0.59814059 | 75.5 | 3.76E-09 | 8.59E-08 | 9.85E-17 | 2.54E-14 | 2.59E-17 | 0.62416158  | 90.5 | 5.       |          |          |          |          |            |       |          |          |          |          |          |            |









# Table S2: PRCR analysis data for |G| with |G[0]|=2 mM: PRCR sensitivity indices and their corresponding p-values

| Time discretization | l         | k        | l (P/PR) | k (P/PR) | alpha    | g         | ε         | l (G) | k (G)     | Time discretization | l        | k        | l (P/PR) | k (P/PR)  | alpha     | g   | ε         | l (G)    | k (G)    | Time discretization | l        | k         | l (P/PR)  | k (P/PR) | alpha     | g        | ε        | l (G)    | k (G)    |           |           |
|---------------------|-----------|----------|----------|----------|----------|-----------|-----------|-------|-----------|---------------------|----------|----------|----------|-----------|-----------|-----|-----------|----------|----------|---------------------|----------|-----------|-----------|----------|-----------|----------|----------|----------|----------|-----------|-----------|
| 0                   | 0         | 0        |          |          |          |           |           |       |           | 0                   | 0        | 0        |          |           |           |     |           |          |          | 0                   | 0        | 0         |           |          |           |          |          |          |          |           |           |
| 0.1                 | 0.037408  | 0.0180   | 0.501429 | 0.793970 | 0.170750 | 0.055391  | 0.999314  | 0.1   | 0.037408  | 0.0180              | 0.501429 | 0.793970 | 0.170750 | 0.055391  | 0.999314  | 0.1 | 0.037408  | 0.0180   | 0.501429 | 0.793970            | 0.170750 | 0.055391  | 0.999314  | 0.1      | 0.037408  | 0.0180   | 0.501429 | 0.793970 | 0.170750 | 0.055391  | 0.999314  |
| 0.2                 | 0.048913  | 0.021029 | 0.688004 | 0.931019 | 0.120299 | 0.047883  | 0.999524  | 0.2   | 0.048913  | 0.021029            | 0.688004 | 0.931019 | 0.120299 | 0.047883  | 0.999524  | 0.2 | 0.048913  | 0.021029 | 0.688004 | 0.931019            | 0.120299 | 0.047883  | 0.999524  | 0.2      | 0.048913  | 0.021029 | 0.688004 | 0.931019 | 0.120299 | 0.047883  | 0.999524  |
| 0.3                 | 0.18316   | 0.004376 | 0.784882 | 0.829124 | 0.153511 | 0.061107  | 0.997849  | 0.3   | 0.18316   | 0.004376            | 0.784882 | 0.829124 | 0.153511 | 0.061107  | 0.997849  | 0.3 | 0.18316   | 0.004376 | 0.784882 | 0.829124            | 0.153511 | 0.061107  | 0.997849  | 0.3      | 0.18316   | 0.004376 | 0.784882 | 0.829124 | 0.153511 | 0.061107  | 0.997849  |
| 0.4                 | 0.059937  | 0.000934 | 0.832933 | 0.423526 | 0.163099 | 0.049470  | 0.996345  | 0.4   | 0.059937  | 0.000934            | 0.832933 | 0.423526 | 0.163099 | 0.049470  | 0.996345  | 0.4 | 0.059937  | 0.000934 | 0.832933 | 0.423526            | 0.163099 | 0.049470  | 0.996345  | 0.4      | 0.059937  | 0.000934 | 0.832933 | 0.423526 | 0.163099 | 0.049470  | 0.996345  |
| 0.5                 | 0.020263  | 0.043222 | 0.886883 | 0.673158 | 0.109606 | 0.050068  | 0.994471  | 0.5   | 0.020263  | 0.043222            | 0.886883 | 0.673158 | 0.109606 | 0.050068  | 0.994471  | 0.5 | 0.020263  | 0.043222 | 0.886883 | 0.673158            | 0.109606 | 0.050068  | 0.994471  | 0.5      | 0.020263  | 0.043222 | 0.886883 | 0.673158 | 0.109606 | 0.050068  | 0.994471  |
| 0.6                 | 0.014443  | 0.009993 | 0.880949 | 0.531177 | 0.082951 | 0.028668  | 0.994471  | 0.6   | 0.014443  | 0.009993            | 0.880949 | 0.531177 | 0.082951 | 0.028668  | 0.994471  | 0.6 | 0.014443  | 0.009993 | 0.880949 | 0.531177            | 0.082951 | 0.028668  | 0.994471  | 0.6      | 0.014443  | 0.009993 | 0.880949 | 0.531177 | 0.082951 | 0.028668  | 0.994471  |
| 0.7                 | 0.02509   | 0.019788 | 0.893273 | 0.526793 | 0.037458 | 0.040354  | 0.998761  | 0.7   | 0.02509   | 0.019788            | 0.893273 | 0.526793 | 0.037458 | 0.040354  | 0.998761  | 0.7 | 0.02509   | 0.019788 | 0.893273 | 0.526793            | 0.037458 | 0.040354  | 0.998761  | 0.7      | 0.02509   | 0.019788 | 0.893273 | 0.526793 | 0.037458 | 0.040354  | 0.998761  |
| 0.8                 | 0.019544  | 0.026744 | 0.846777 | 0.446777 | 0.091807 | 0.031887  | 0.997670  | 0.8   | 0.019544  | 0.026744            | 0.846777 | 0.446777 | 0.091807 | 0.031887  | 0.997670  | 0.8 | 0.019544  | 0.026744 | 0.846777 | 0.446777            | 0.091807 | 0.031887  | 0.997670  | 0.8      | 0.019544  | 0.026744 | 0.846777 | 0.446777 | 0.091807 | 0.031887  | 0.997670  |
| 0.9                 | 0.020797  | 0.017477 | 0.891278 | 0.504788 | 0.015279 | 0.031456  | 0.999761  | 0.9   | 0.020797  | 0.017477            | 0.891278 | 0.504788 | 0.015279 | 0.031456  | 0.999761  | 0.9 | 0.020797  | 0.017477 | 0.891278 | 0.504788            | 0.015279 | 0.031456  | 0.999761  | 0.9      | 0.020797  | 0.017477 | 0.891278 | 0.504788 | 0.015279 | 0.031456  | 0.999761  |
| 1.0                 | 0.062828  | 0.010204 | 0.900226 | 0.546917 | 0.014831 | 0.029125  | 0.998545  | 1.0   | 0.062828  | 0.010204            | 0.900226 | 0.546917 | 0.014831 | 0.029125  | 0.998545  | 1.0 | 0.062828  | 0.010204 | 0.900226 | 0.546917            | 0.014831 | 0.029125  | 0.998545  | 1.0      | 0.062828  | 0.010204 | 0.900226 | 0.546917 | 0.014831 | 0.029125  | 0.998545  |
| 1.1                 | 0.090230  | 0.021306 | 0.846244 | 0.909495 | 0.004109 | 0.038418  | 0.998128  | 1.1   | 0.090230  | 0.021306            | 0.846244 | 0.909495 | 0.004109 | 0.038418  | 0.998128  | 1.1 | 0.090230  | 0.021306 | 0.846244 | 0.909495            | 0.004109 | 0.038418  | 0.998128  | 1.1      | 0.090230  | 0.021306 | 0.846244 | 0.909495 | 0.004109 | 0.038418  | 0.998128  |
| 1.2                 | 0.0814284 | 0.020119 | 0.890226 | 0.512138 | 0.038861 | 0.061797  | 0.997297  | 1.2   | 0.0814284 | 0.020119            | 0.890226 | 0.512138 | 0.038861 | 0.061797  | 0.997297  | 1.2 | 0.0814284 | 0.020119 | 0.890226 | 0.512138            | 0.038861 | 0.061797  | 0.997297  | 1.2      | 0.0814284 | 0.020119 | 0.890226 | 0.512138 | 0.038861 | 0.061797  | 0.997297  |
| 1.3                 | 0.1374817 | 0.030373 | 0.893781 | 0.437177 | 0.040819 | 0.082016  | 0.997430  | 1.3   | 0.1374817 | 0.030373            | 0.893781 | 0.437177 | 0.040819 | 0.082016  | 0.997430  | 1.3 | 0.1374817 | 0.030373 | 0.893781 | 0.437177            | 0.040819 | 0.082016  | 0.997430  | 1.3      | 0.1374817 | 0.030373 | 0.893781 | 0.437177 | 0.040819 | 0.082016  | 0.997430  |
| 1.4                 | 0.1402016 | 0.05444  | 0.871762 | 0.510754 | 0.079501 | 0.113892  | 0.996204  | 1.4   | 0.1402016 | 0.05444             | 0.871762 | 0.510754 | 0.079501 | 0.113892  | 0.996204  | 1.4 | 0.1402016 | 0.05444  | 0.871762 | 0.510754            | 0.079501 | 0.113892  | 0.996204  | 1.4      | 0.1402016 | 0.05444  | 0.871762 | 0.510754 | 0.079501 | 0.113892  | 0.996204  |
| 1.5                 | 0.1386225 | 0.07181  | 0.893303 | 0.540610 | 0.102701 | 0.1165367 | 0.996414  | 1.5   | 0.1386225 | 0.07181             | 0.893303 | 0.540610 | 0.102701 | 0.1165367 | 0.996414  | 1.5 | 0.1386225 | 0.07181  | 0.893303 | 0.540610            | 0.102701 | 0.1165367 | 0.996414  | 1.5      | 0.1386225 | 0.07181  | 0.893303 | 0.540610 | 0.102701 | 0.1165367 | 0.996414  |
| 1.6                 | 0.1581214 | 0.017678 | 0.890248 | 0.510549 | 0.112545 | 0.123898  | 0.998353  | 1.6   | 0.1581214 | 0.017678            | 0.890248 | 0.510549 | 0.112545 | 0.123898  | 0.998353  | 1.6 | 0.1581214 | 0.017678 | 0.890248 | 0.510549            | 0.112545 | 0.123898  | 0.998353  | 1.6      | 0.1581214 | 0.017678 | 0.890248 | 0.510549 | 0.112545 | 0.123898  | 0.998353  |
| 1.7                 | 0.1714672 | 0.118654 | 0.892721 | 0.510372 | 0.129425 | 0.128619  | 0.9948117 | 1.7   | 0.1714672 | 0.118654            | 0.892721 | 0.510372 | 0.129425 | 0.128619  | 0.9948117 | 1.7 | 0.1714672 | 0.118654 | 0.892721 | 0.510372            | 0.129425 | 0.128619  | 0.9948117 | 1.7      | 0.1714672 | 0.118654 | 0.892721 | 0.510372 | 0.129425 | 0.128619  | 0.9948117 |
| 1.8                 | 0.1651731 | 0.137269 | 0.897245 | 0.510351 | 0.107743 | 0.1545163 | 0.993591  | 1.8   | 0.1651731 | 0.137269            | 0.897245 | 0.510351 | 0.107743 | 0.1545163 | 0.993591  | 1.8 | 0.1651731 | 0.137269 | 0.897245 | 0.510351            | 0.107743 | 0.1545163 | 0.993591  | 1.8      | 0.1651731 | 0.137269 | 0.897245 | 0.510351 | 0.107743 | 0.1545163 | 0.993591  |
| 1.9                 | 0.162448  | 0.161418 | 0.866465 | 0.509063 | 0.145802 | 0.1602351 | 0.992864  | 1.9   | 0.162448  | 0.161418            | 0.866465 | 0.509063 | 0.145802 | 0.1602351 | 0.992864  | 1.9 | 0.162448  | 0.161418 | 0.866465 | 0.509063            | 0.145802 | 0.1602351 | 0.992864  | 1.9      | 0.162448  | 0.161418 | 0.866465 | 0.509063 | 0.145802 | 0.1602351 | 0.992864  |
| 2.0                 | 0.1746649 | 0.184187 | 0.856869 | 0.490283 | 0.130086 | 0.1807483 | 0.995984  | 2.0   | 0.1746649 | 0.184187            | 0.856869 | 0.490283 | 0.130086 | 0.1807483 | 0.995984  | 2.0 | 0.1746649 | 0.184187 | 0.856869 | 0.490283            | 0.130086 | 0.1807483 | 0.995984  | 2.0      | 0.1746649 | 0.184187 | 0.856869 | 0.490283 | 0.130086 | 0.1807483 | 0.995984  |
| 2.1                 | 0.1710137 | 0.214485 | 0.845927 | 0.490283 | 0.135671 | 0.1857248 | 0.998267  | 2.1   | 0.1710137 | 0.214485            | 0.845927 | 0.490283 | 0.135671 | 0.1857248 | 0.998267  | 2.1 | 0.1710137 | 0.214485 | 0.845927 | 0.490283            | 0.135671 | 0.1857248 | 0.998267  | 2.1      | 0.1710137 | 0.214485 | 0.845927 | 0.490283 | 0.135671 | 0.1857248 | 0.998267  |
| 2.2                 | 0.1713798 | 0.219296 | 0.849741 | 0.479261 | 0.134647 | 0.2069404 | 0.997587  | 2.2   | 0.1713798 | 0.219296            | 0.849741 | 0.479261 | 0.134647 | 0.2069404 | 0.997587  | 2.2 | 0.1713798 | 0.219296 | 0.849741 | 0.479261            | 0.134647 | 0.2069404 | 0.997587  | 2.2      | 0.1713798 | 0.219296 | 0.849741 | 0.479261 | 0.134647 | 0.2069404 | 0.997587  |
| 2.3                 | 0.1713814 | 0.232826 | 0.841549 | 0.466132 | 0.130685 | 0.181791  | 0.998713  | 2.3   | 0.1713814 | 0.232826            | 0.841549 | 0.466132 | 0.130685 | 0.181791  | 0.998713  | 2.3 | 0.1713814 | 0.232826 | 0.841549 | 0.466132            | 0.130685 | 0.181791  | 0.998713  | 2.3      | 0.1713814 | 0.232826 | 0.841549 | 0.466132 | 0.130685 | 0.181791  | 0.998713  |
| 2.4                 | 0.1812026 | 0.252188 | 0.846716 | 0.479261 | 0.108671 | 0.2269404 | 0.994303  | 2.4   | 0.1812026 | 0.252188            | 0.846716 | 0.479261 | 0.108671 | 0.2269404 | 0.994303  | 2.4 | 0.1812026 | 0.252188 | 0.846716 | 0.479261            | 0.108671 | 0.2269404 | 0.994303  | 2.4      | 0.1812026 | 0.252188 | 0.846716 | 0.479261 | 0.108671 | 0.2269404 | 0.994303  |
| 2.5                 | 0.1968414 | 0.271808 | 0.833506 | 0.466132 | 0.147854 | 0.2218491 | 0.998172  | 2.5   | 0.1968414 | 0.271808            | 0.833506 | 0.466132 | 0.147854 | 0.2218491 | 0.998172  | 2.5 | 0.1968414 | 0.271808 | 0.833506 | 0.466132            | 0.147854 | 0.2218491 | 0.998172  | 2.5      | 0.1968414 | 0.271808 | 0.833506 | 0.466132 | 0.147854 | 0.2218491 | 0.998172  |
| 2.6                 | 0.2003737 | 0.269923 | 0.828156 | 0.466132 | 0.161848 | 0.232826  | 0.997337  | 2.6   | 0.2003737 | 0.269923            | 0.828156 | 0.466132 | 0.161848 | 0.232826  | 0.997337  | 2.6 | 0.2003737 | 0.269923 | 0.828156 | 0.466132            | 0.161848 | 0.232826  | 0.997337  | 2.6      | 0.2003737 | 0.269923 | 0.828156 | 0.466132 | 0.161848 | 0.232826  | 0.997337  |
| 2.7                 | 0.2038026 | 0.274661 | 0.826033 | 0.470926 | 0.157079 | 0.2378474 | 0.997842  | 2.7   | 0.2038026 | 0.274661            | 0.826033 | 0.470926 | 0.157079 | 0.2378474 | 0.997842  | 2.7 | 0.2038026 | 0.274661 | 0.826033 | 0.470926            | 0.157079 | 0.2378474 | 0.997842  | 2.7      | 0.2038026 | 0.274661 | 0.826033 | 0.470926 | 0.157079 | 0.2378474 | 0.997842  |
| 2.8                 | 0.2042679 | 0.284401 | 0.826101 | 0.454599 | 0.157079 | 0.239119  | 0.997937  | 2.8   | 0.2042679 | 0.284401            | 0.826101 | 0.454599 | 0.157079 | 0.239119  | 0.997937  | 2.8 | 0.2042679 | 0.284401 | 0.826101 | 0.454599            | 0.157079 | 0.239119  | 0.997937  | 2.8      | 0.2042679 | 0.284401 | 0.826101 | 0.454599 | 0.157079 | 0.239119  | 0.997937  |
| 2.9                 | 0.2103213 | 0.290119 | 0.794741 | 0.460713 | 0.167147 | 0.243309  | 0.997803  | 2.9   | 0.2103213 | 0.290119            | 0.794741 | 0.460713 | 0.167147 | 0.243309  | 0.997803  | 2.9 | 0.2103213 | 0.290119 | 0.794741 | 0.460713            | 0.167147 | 0.243309  | 0.997803  | 2.9      | 0.2103213 | 0.290119 | 0.794741 | 0.460713 | 0.167147 | 0.243309  | 0.997803  |
| 3.0                 | 0.2119102 | 0.318084 | 0.797149 | 0.440713 | 0.172181 | 0.254488  | 0.990013  | 3.0   | 0.2119102 | 0.318084            | 0.797149 |          |          |           |           |     |           |          |          |                     |          |           |           |          |           |          |          |          |          |           |           |











|     |        |        |        |        |        |        |        |      |        |        |         |        |         |        |            |      |        |        |         |         |         |         |            |      |       |        |         |       |       |       |        |            |
|-----|--------|--------|--------|--------|--------|--------|--------|------|--------|--------|---------|--------|---------|--------|------------|------|--------|--------|---------|---------|---------|---------|------------|------|-------|--------|---------|-------|-------|-------|--------|------------|
| 110 | 2.2407 | 2.008  | 4.7432 | 3.940  | 5.8115 | 5.315  | 1.316  | 26.9 | 9.4441 | 7.9549 | 1.16625 | 1.1118 | 1.63126 | 4.4445 | 0.05393606 | 41.9 | 6.718  | 3.855  | 1.70124 | 1.51108 | 2.42133 | 9.726   | 0.46675312 | 56.8 | 4.738 | 1.6254 | 5.38823 | 8.578 | 1.778 | 3.9   | 1.0287 | 0.89028287 |
| 121 | 1.7407 | 2.049  | 7.0502 | 4.252  | 1.0115 | 5.498  | 5.506  | 27   | 1.0110 | 7.7009 | 1.16625 | 1.0448 | 1.44426 | 4.4445 | 0.05393606 | 42.0 | 6.718  | 3.855  | 1.70124 | 1.51108 | 2.42133 | 9.726   | 0.46675312 | 56.9 | 4.738 | 1.6254 | 5.38823 | 8.578 | 1.778 | 3.9   | 1.0287 | 0.89028287 |
| 122 | 1.8307 | 1.5209 | 2.049  | 7.0502 | 4.252  | 1.0115 | 5.498  | 28   | 9.5711 | 8.3819 | 9.80626 | 1.0118 | 1.3826  | 4.4445 | 0.05393606 | 42.1 | 5.5013 | 1.3771 | 6.11124 | 1.60138 | 1.08833 | 9.466   | 0.48078761 | 57.0 | 4.296 | 1.616  | 6.340   | 8.808 | 1.178 | 9.0   | 1.038  | 0.879555   |
| 123 | 1.9907 | 1.888  | 6.532  | 6.386  | 1.8215 | 6.058  | 2.138  | 27.1 | 9.1018 | 1.5486 | 9.198   | 1.028  | 1.0826  | 4.478  | 0.0607869  | 42.2 | 5.0813 | 1.1111 | 6.11124 | 1.7208  | 1.33333 | 9.098   | 0.48293488 | 57.1 | 4.546 | 1.748  | 6.173   | 8.018 | 1.128 | 8.868 | 0.8    | 0.88649    |
| 124 | 1.498  | 1.498  | 1.498  | 1.498  | 1.498  | 1.498  | 1.498  | 27.2 | 8.9801 | 1.5886 | 1.04825 | 9.888  | 8.877   | 4.888  | 0.04440487 | 42.3 | 4.8911 | 1.1111 | 6.11124 | 1.7708  | 1.33333 | 9.098   | 0.48440487 | 57.2 | 4.396 | 1.748  | 6.173   | 8.018 | 1.128 | 8.868 | 0.8    | 0.88649    |
| 125 | 1.1307 | 2.3709 | 1.0381 | 6.198  | 1.1307 | 2.3709 | 1.0381 | 27.3 | 7.8881 | 1.9809 | 1.19825 | 9.888  | 8.877   | 4.888  | 0.04440487 | 42.4 | 4.8911 | 1.1111 | 6.11124 | 1.7708  | 1.33333 | 9.098   | 0.48440487 | 57.3 | 4.396 | 1.748  | 6.173   | 8.018 | 1.128 | 8.868 | 0.8    | 0.88649    |
| 126 | 1.1607 | 2.6209 | 1.0938 | 5.988  | 1.1607 | 2.6209 | 1.0938 | 27.4 | 7.4881 | 1.5428 | 1.23825 | 9.888  | 8.877   | 4.888  | 0.04440487 | 42.5 | 4.8911 | 1.1111 | 6.11124 | 1.7708  | 1.33333 | 9.098   | 0.48440487 | 57.4 | 4.396 | 1.748  | 6.173   | 8.018 | 1.128 | 8.868 | 0.8    | 0.88649    |
| 127 | 1.6107 | 2.6109 | 1.0981 | 6.198  | 1.1607 | 2.6209 | 1.0938 | 27.5 | 7.0881 | 1.5428 | 1.23825 | 9.888  | 8.877   | 4.888  | 0.04440487 | 42.6 | 4.8911 | 1.1111 | 6.11124 | 1.7708  | 1.33333 | 9.098   | 0.48440487 | 57.5 | 4.396 | 1.748  | 6.173   | 8.018 | 1.128 | 8.868 | 0.8    | 0.88649    |
| 128 | 1.6607 | 2.5609 | 1.1081 | 6.198  | 1.1607 | 2.6209 | 1.0938 | 27.6 | 7.2881 | 1.5188 | 1.23825 | 9.888  | 8.877   | 4.888  | 0.04440487 | 42.7 | 4.8911 | 1.1111 | 6.11124 | 1.7708  | 1.33333 | 9.098   | 0.48440487 | 57.6 | 4.396 | 1.748  | 6.173   | 8.018 | 1.128 | 8.868 | 0.8    | 0.88649    |
| 129 | 1.7607 | 2.1609 | 1.1382 | 6.198  | 1.1607 | 2.6209 | 1.0938 | 27.7 | 7.3181 | 1.5048 | 1.23825 | 9.888  | 8.877   | 4.888  | 0.04440487 | 42.8 | 4.8911 | 1.1111 | 6.11124 | 1.7708  | 1.33333 | 9.098   | 0.48440487 | 57.7 | 4.396 | 1.748  | 6.173   | 8.018 | 1.128 | 8.868 | 0.8    | 0.88649    |
| 130 | 1.8607 | 2.1609 | 1.1382 | 6.198  | 1.1607 | 2.6209 | 1.0938 | 27.8 | 7.4181 | 1.4908 | 1.23825 | 9.888  | 8.877   | 4.888  | 0.04440487 | 42.9 | 4.8911 | 1.1111 | 6.11124 | 1.7708  | 1.33333 | 9.098   | 0.48440487 | 57.8 | 4.396 | 1.748  | 6.173   | 8.018 | 1.128 | 8.868 | 0.8    | 0.88649    |
| 131 | 1.9607 | 2.1609 | 1.1382 | 6.198  | 1.1607 | 2.6209 | 1.0938 | 27.9 | 7.5181 | 1.4768 | 1.23825 | 9.888  | 8.877   | 4.888  | 0.04440487 | 43.0 | 4.8911 | 1.1111 | 6.11124 | 1.7708  | 1.33333 | 9.098   | 0.48440487 | 57.9 | 4.396 | 1.748  | 6.173   | 8.018 | 1.128 | 8.868 | 0.8    | 0.88649    |
| 132 | 2.0607 | 2.1609 | 1.1382 | 6.198  | 1.1607 | 2.6209 | 1.0938 | 28.0 | 7.6181 | 1.4628 | 1.23825 | 9.888  | 8.877   | 4.888  | 0.04440487 | 43.1 | 4.8911 | 1.1111 | 6.11124 | 1.7708  | 1.33333 | 9.098   | 0.48440487 | 58.0 | 4.396 | 1.748  | 6.173   | 8.018 | 1.128 | 8.868 | 0.8    | 0.88649    |
| 133 | 2.1607 | 2.1609 | 1.1382 | 6.198  | 1.1607 | 2.6209 | 1.0938 | 28.1 | 7.7181 | 1.4488 | 1.23825 | 9.888  | 8.877   | 4.888  | 0.04440487 | 43.2 | 4.8911 | 1.1111 | 6.11124 | 1.7708  | 1.33333 | 9.098   | 0.48440487 | 58.1 | 4.396 | 1.748  | 6.173   | 8.018 | 1.128 | 8.868 | 0.8    | 0.88649    |
| 134 | 2.2607 | 2.1609 | 1.1382 | 6.198  | 1.1607 | 2.6209 | 1.0938 | 28.2 | 7.8181 | 1.4348 | 1.23825 | 9.888  | 8.877   | 4.888  | 0.04440487 | 43.3 | 4.8911 | 1.1111 | 6.11124 | 1.7708  | 1.33333 | 9.098   | 0.48440487 | 58.2 | 4.396 | 1.748  | 6.173   | 8.018 | 1.128 | 8.868 | 0.8    | 0.88649    |
| 135 | 2.3607 | 2.1609 | 1.1382 | 6.198  | 1.1607 | 2.6209 | 1.0938 | 28.3 | 7.9181 | 1.4208 | 1.23825 | 9.888  | 8.877   | 4.888  | 0.04440487 | 43.4 | 4.8911 | 1.1111 | 6.11124 | 1.7708  | 1.33333 | 9.098   | 0.48440487 | 58.3 | 4.396 | 1.748  | 6.173   | 8.018 | 1.128 | 8.868 | 0.8    | 0.88649    |
| 136 | 2.4607 | 2.1609 | 1.1382 | 6.198  | 1.1607 | 2.6209 | 1.0938 | 28.4 | 8.0181 | 1.4068 | 1.23825 | 9.888  | 8.877   | 4.888  | 0.04440487 | 43.5 | 4.8911 | 1.1111 | 6.11124 | 1.7708  | 1.33333 | 9.098   | 0.48440487 | 58.4 | 4.396 | 1.748  | 6.173   | 8.018 | 1.128 | 8.868 | 0.8    | 0.88649    |
| 137 | 2.5607 | 2.1609 | 1.1382 | 6.198  | 1.1607 | 2.6209 | 1.0938 | 28.5 | 8.1181 | 1.3928 | 1.23825 | 9.888  | 8.877   | 4.888  | 0.04440487 | 43.6 | 4.8911 | 1.1111 | 6.11124 | 1.7708  | 1.33333 | 9.098   | 0.48440487 | 58.5 | 4.396 | 1.748  | 6.173   | 8.018 | 1.128 | 8.868 | 0.8    | 0.88649    |
| 138 | 2.6607 | 2.1609 | 1.1382 | 6.198  | 1.1607 | 2.6209 | 1.0938 | 28.6 | 8.2181 | 1.3788 | 1.23825 | 9.888  | 8.877   | 4.888  | 0.04440487 | 43.7 | 4.8911 | 1.1111 | 6.11124 | 1.7708  | 1.33333 | 9.098   | 0.48440487 | 58.6 | 4.396 | 1.748  | 6.173   | 8.018 | 1.128 | 8.868 | 0.8    | 0.88649    |
| 139 | 2.7607 | 2.1609 | 1.1382 | 6.198  | 1.1607 | 2.6209 | 1.0938 | 28.7 | 8.3181 | 1.3648 | 1.23825 | 9.888  | 8.877   | 4.888  | 0.04440487 | 43.8 | 4.8911 | 1.1111 | 6.11124 | 1.7708  | 1.33333 | 9.098   | 0.48440487 | 58.7 | 4.396 | 1.748  | 6.173   | 8.018 | 1.128 | 8.868 | 0.8    | 0.88649    |
| 140 | 2.8607 | 2.1609 | 1.1382 | 6.198  | 1.1607 | 2.6209 | 1.0938 | 28.8 | 8.4181 | 1.3508 | 1.23825 | 9.888  | 8.877   | 4.888  | 0.04440487 | 43.9 | 4.8911 | 1.1111 | 6.11124 | 1.7708  | 1.33333 | 9.098   | 0.48440487 | 58.8 | 4.396 | 1.748  | 6.173   | 8.018 | 1.128 | 8.868 | 0.8    | 0.88649    |
| 141 | 2.9607 | 2.1609 | 1.1382 | 6.198  | 1.1607 | 2.6209 | 1.0938 | 28.9 | 8.5181 | 1.3368 | 1.23825 | 9.888  | 8.877   | 4.888  | 0.04440487 | 44.0 | 4.8911 | 1.1111 | 6.11124 | 1.7708  | 1.33333 | 9.098   | 0.48440487 | 58.9 | 4.396 | 1.748  | 6.173   | 8.018 | 1.128 | 8.868 | 0.8    | 0.88649    |
| 142 | 3.0607 | 2.1609 | 1.1382 | 6.198  | 1.1607 | 2.6209 | 1.0938 | 29.0 | 8.6181 | 1.3228 | 1.23825 | 9.888  | 8.877   | 4.888  | 0.04440487 | 44.1 | 4.8911 | 1.1111 | 6.11124 | 1.7708  | 1.33333 | 9.098   | 0.48440487 | 59.0 | 4.396 | 1.748  | 6.173   | 8.018 | 1.128 | 8.868 | 0.8    | 0.88649    |
| 143 | 3.1607 | 2.1609 | 1.1382 | 6.198  | 1.1607 | 2.6209 | 1.0938 | 29.1 | 8.7181 | 1.3088 | 1.23825 | 9.888  | 8.877   | 4.888  | 0.04440487 | 44.2 | 4.8911 | 1.1111 | 6.11124 | 1.7708  | 1.33333 | 9.098   | 0.48440487 | 59.1 | 4.396 | 1.748  | 6.173   | 8.018 | 1.128 | 8.868 | 0.8    | 0.88649    |
| 144 | 3.2607 | 2.1609 | 1.1382 | 6.198  | 1.1607 | 2.6209 | 1.0938 | 29.2 | 8.8181 | 1.2948 | 1.23825 | 9.888  | 8.877   | 4.888  | 0.04440487 | 44.3 | 4.8911 | 1.1111 | 6.11124 | 1.7708  | 1.33333 | 9.098   | 0.48440487 | 59.2 | 4.396 | 1.748  | 6.173   | 8.018 | 1.128 | 8.868 | 0.8    | 0.88649    |
| 145 | 3.3607 | 2.1609 | 1.1382 | 6.198  | 1.1607 | 2.6209 | 1.0938 | 29.3 | 8.9181 | 1.2808 | 1.23825 | 9.888  | 8.877   | 4.888  | 0.04440487 | 44.4 | 4.8911 | 1.1111 | 6.11124 | 1.7708  | 1.33333 | 9.098   | 0.48440487 | 59.3 | 4.396 | 1.748  | 6.173   | 8.018 | 1.128 | 8.868 | 0.8    | 0.88649    |
| 146 | 3.4607 | 2.1609 | 1.1382 | 6.198  | 1.1607 | 2.6209 | 1.0938 | 29.4 | 9.0181 | 1.2668 | 1.23825 | 9.888  | 8.877   | 4.888  | 0.04440487 | 44.5 | 4.8911 | 1.1111 | 6.11124 | 1.7708  | 1.33333 | 9.098   | 0.48440487 | 59.4 | 4.396 | 1.748  | 6.173   | 8.018 | 1.128 | 8.868 | 0.8    | 0.88649    |
| 147 | 3.5607 | 2.1609 | 1.1382 | 6.198  | 1.1607 | 2.6209 | 1.0938 | 29.5 | 9.1181 | 1.2528 | 1.23825 | 9.888  | 8.877   | 4.888  | 0.04440487 | 44.6 | 4.8911 | 1.1111 | 6.11124 | 1.7708  | 1.33333 | 9.098   | 0.48440487 | 59.5 | 4.396 | 1.748  | 6.173   | 8.018 | 1.128 | 8.868 | 0.8    | 0.88649    |
| 148 | 3.6607 | 2.1609 | 1.1382 | 6.198  | 1.1607 | 2.6209 | 1.0938 | 29.6 | 9.2181 | 1.2388 | 1.23825 | 9.888  | 8.877   | 4.888  | 0.04440487 | 44.7 | 4.8911 | 1.1111 | 6.11124 | 1.7708  | 1.33333 | 9.098   | 0.48440487 | 59.6 | 4.396 | 1.748  | 6.173   | 8.018 | 1.128 | 8.868 | 0.8    | 0.88649    |
| 149 | 3.7607 | 2.1609 | 1.1382 | 6.198  | 1.1607 | 2.6209 | 1.0938 | 29.7 | 9.3181 | 1.2248 | 1.23825 | 9.888  | 8.877   | 4.888  | 0.04440487 | 44.8 | 4.8911 | 1.1111 | 6.11124 | 1.7708  | 1.33333 | 9.098   | 0.48440487 | 59.7 | 4.396 | 1.748  | 6.173   | 8.018 | 1.128 | 8.868 | 0.8    | 0.88649    |
| 150 | 3.8607 | 2.1609 | 1.1382 | 6.198  | 1.1607 | 2.6209 | 1.0938 | 29.8 | 9.4181 | 1.2108 | 1.23825 | 9.888  | 8.877   | 4.888  | 0.04440487 | 44.9 | 4.8911 | 1.1111 | 6.11124 | 1.7708  | 1.33333 | 9.098   | 0.48440487 | 59.8 | 4.396 | 1.748  | 6.173   | 8.018 | 1.128 | 8.868 | 0.8    | 0.88649    |
| 151 | 3.9607 | 2.1609 | 1.1382 | 6.198  | 1.1607 | 2.6209 | 1.0938 | 29.9 | 9.5181 | 1.1968 | 1.23825 | 9.888  | 8.877   | 4.888  | 0.04440487 | 45.0 | 4.8911 | 1.1111 | 6.11124 | 1.7708  | 1.33333 | 9.098   | 0.48440487 | 59.9 | 4.396 | 1.748  | 6.173   | 8.018 | 1.128 | 8.868 | 0.8    | 0.88649    |
| 152 | 4.0607 | 2.1609 | 1.1382 | 6.198  | 1.1607 | 2.6209 | 1.0938 | 30.0 | 9.6181 | 1.1828 | 1.23825 | 9.888  | 8.877   | 4.888  | 0.04440487 | 45.1 | 4.8911 | 1.1111 | 6.11124 | 1.7708  | 1.33333 | 9.098   | 0.48440487 | 60.0 | 4.396 | 1.748  | 6.173   | 8.018 | 1.128 | 8.868 | 0.8    | 0.88649    |
| 153 | 4.1607 | 2.1609 | 1.1382 | 6.198  | 1.1607 | 2.6209 | 1.0938 | 30.1 | 9.7181 | 1.1688 | 1.23825 | 9.888  | 8.877   | 4.888  | 0.04440487 | 45.2 | 4.8911 | 1.1111 | 6.11124 | 1.7708  | 1.33333 | 9.098   | 0.48440487 | 60.1 | 4.396 | 1.748  | 6.173   | 8.018 | 1.128 | 8.868 | 0.8    | 0.88649    |
| 154 | 4.2607 | 2.1609 | 1.1382 | 6.198  | 1.1607 | 2.6209 | 1.0938 | 30.2 | 9.8181 | 1.1548 | 1.23825 | 9.888  | 8.877   | 4.888  | 0.04440487 | 45.3 | 4.8911 | 1.1111 | 6.11124 | 1.7708  | 1.33333 | 9.098</ |            |      |       |        |         |       |       |       |        |            |



|      |        |        |        |        |        |        |            |      |        |        |        |        |        |              |            |        |        |        |        |        |        |            |            |        |        |        |        |        |        |            |            |
|------|--------|--------|--------|--------|--------|--------|------------|------|--------|--------|--------|--------|--------|--------------|------------|--------|--------|--------|--------|--------|--------|------------|------------|--------|--------|--------|--------|--------|--------|------------|------------|
| 69   | 1.9467 | 1.1885 | 8.9721 | 2.4167 | 1.3362 | 3.5068 | 0.95641874 | 84   | 1.7467 | 1.4461 | 1.7798 | 2.7276 | 8.1714 | 1.2361       | 0.81524319 | 99     | 2.2716 | 3.4026 | 2.1185 | 1.6305 | 9.7143 | 2.6661     | 0.52296312 | 114    | 5.8815 | 4.8085 | 8.7314 | 6.6465 | 1.0641 | 2.2881     | 0.47307905 |
| 69.1 | 2.1217 | 1.2201 | 1.5581 | 2.5667 | 1.5462 | 4.2442 | 0.94743576 | 84.1 | 1.6937 | 1.3710 | 1.9008 | 2.8886 | 7.2964 | 1.1560       | 0.84077200 | 99.1   | 2.5648 | 1.4404 | 2.3885 | 1.6305 | 1.1442 | 2.6561     | 0.51243486 | 114.1  | 6.2065 | 1.4888 | 9.0664 | 6.8886 | 1.0641 | 2.2781     | 0.47431811 |
| 69.2 | 2.1217 | 1.2201 | 1.5581 | 2.5667 | 1.5462 | 4.2442 | 0.94743576 | 84.2 | 1.6937 | 1.3710 | 1.9008 | 2.8886 | 7.2964 | 1.1560       | 0.84077200 | 99.2   | 2.5648 | 1.4404 | 2.3885 | 1.6305 | 1.1442 | 2.6561     | 0.51243486 | 114.2  | 6.2065 | 1.4888 | 9.0664 | 6.8886 | 1.0641 | 2.2781     | 0.47431811 |
| 69.3 | 2.1217 | 1.2201 | 1.5581 | 2.5667 | 1.5462 | 4.2442 | 0.94743576 | 84.3 | 1.6937 | 1.3710 | 1.9008 | 2.8886 | 7.2964 | 1.1560       | 0.84077200 | 99.3   | 2.5648 | 1.4404 | 2.3885 | 1.6305 | 1.1442 | 2.6561     | 0.51243486 | 114.3  | 6.2065 | 1.4888 | 9.0664 | 6.8886 | 1.0641 | 2.2781     | 0.47431811 |
| 69.4 | 1.1885 | 1.7716 | 4.7421 | 2.7770 | 1.5112 | 3.6688 | 0.93967869 | 84.4 | 1.4717 | 1.2381 | 1.6098 | 3.0256 | 6.2394 | 0.9107174664 | 99.4       | 2.9518 | 1.6888 | 2.5115 | 1.6008 | 1.2242 | 2.8881 | 0.51188956 | 114.4      | 6.6185 | 1.6588 | 9.8884 | 6.6708 | 1.1561 | 2.3781 | 0.47321613 |            |
| 69.5 | 1.1885 | 1.7716 | 4.7421 | 2.7770 | 1.5112 | 3.6688 | 0.93967869 | 84.5 | 1.4717 | 1.2381 | 1.6098 | 3.0256 | 6.2394 | 0.9107174664 | 99.5       | 2.9518 | 1.6888 | 2.5115 | 1.6008 | 1.2242 | 2.8881 | 0.51188956 | 114.5      | 6.6185 | 1.6588 | 9.8884 | 6.6708 | 1.1561 | 2.3781 | 0.47321613 |            |
| 69.6 | 1.1885 | 1.7716 | 4.7421 | 2.7770 | 1.5112 | 3.6688 | 0.93967869 | 84.6 | 1.4717 | 1.2381 | 1.6098 | 3.0256 | 6.2394 | 0.9107174664 | 99.6       | 2.9518 | 1.6888 | 2.5115 | 1.6008 | 1.2242 | 2.8881 | 0.51188956 | 114.6      | 6.6185 | 1.6588 | 9.8884 | 6.6708 | 1.1561 | 2.3781 | 0.47321613 |            |
| 69.7 | 1.1885 | 1.7716 | 4.7421 | 2.7770 | 1.5112 | 3.6688 | 0.93967869 | 84.7 | 1.4717 | 1.2381 | 1.6098 | 3.0256 | 6.2394 | 0.9107174664 | 99.7       | 2.9518 | 1.6888 | 2.5115 | 1.6008 | 1.2242 | 2.8881 | 0.51188956 | 114.7      | 6.6185 | 1.6588 | 9.8884 | 6.6708 | 1.1561 | 2.3781 | 0.47321613 |            |
| 69.8 | 1.1885 | 1.7716 | 4.7421 | 2.7770 | 1.5112 | 3.6688 | 0.93967869 | 84.8 | 1.4717 | 1.2381 | 1.6098 | 3.0256 | 6.2394 | 0.9107174664 | 99.8       | 2.9518 | 1.6888 | 2.5115 | 1.6008 | 1.2242 | 2.8881 | 0.51188956 | 114.8      | 6.6185 | 1.6588 | 9.8884 | 6.6708 | 1.1561 | 2.3781 | 0.47321613 |            |
| 69.9 | 1.1885 | 1.7716 | 4.7421 | 2.7770 | 1.5112 | 3.6688 | 0.93967869 | 84.9 | 1.4717 | 1.2381 | 1.6098 | 3.0256 | 6.2394 | 0.9107174664 | 99.9       | 2.9518 | 1.6888 | 2.5115 | 1.6008 | 1.2242 | 2.8881 | 0.51188956 | 114.9      | 6.6185 | 1.6588 | 9.8884 | 6.6708 | 1.1561 | 2.3781 | 0.47321613 |            |
| 70   | 1.6007 | 7.7716 | 5.8521 | 2.7627 | 8.4903 | 2.8508 | 0.93932284 | 85   | 1.8888 | 1.4526 | 2.1118 | 3.0386 | 7.9144 | 8.1381       | 0.1778021  | 100    | 4.2008 | 3.9006 | 2.9518 | 1.8388 | 1.8742 | 3.1881     | 0.49257264 | 115    | 6.4715 | 1.8908 | 1.1008 | 7.0208 | 1.0881 | 2.1161     | 0.46023471 |
| 70.1 | 1.6007 | 7.7716 | 5.8521 | 2.7627 | 8.4903 | 2.8508 | 0.93932284 | 85.1 | 2.0317 | 1.3892 | 2.2288 | 3.4466 | 8.0244 | 8.0681       | 0.17748739 | 100.1  | 4.5461 | 3.9826 | 3.0165 | 1.8468 | 1.7962 | 3.3731     | 0.49484736 | 115.1  | 6.2405 | 1.9328 | 1.1008 | 7.0208 | 1.0881 | 2.0961     | 0.46164569 |
| 70.2 | 1.6007 | 7.7716 | 5.8521 | 2.7627 | 8.4903 | 2.8508 | 0.93932284 | 85.2 | 2.1117 | 1.3892 | 2.2448 | 3.3086 | 8.0244 | 8.0681       | 0.17748739 | 100.2  | 4.4416 | 3.9006 | 2.9795 | 1.9388 | 1.8742 | 3.1881     | 0.49492849 | 115.2  | 6.2405 | 1.9328 | 1.1008 | 7.0208 | 1.0881 | 2.0961     | 0.46164569 |
| 70.3 | 1.6007 | 7.7716 | 5.8521 | 2.7627 | 8.4903 | 2.8508 | 0.93932284 | 85.3 | 2.2441 | 1.5216 | 2.8688 | 3.8118 | 1.0084 | 1.0110       | 0.77581489 | 100.3  | 4.5326 | 3.7218 | 2.8795 | 1.9798 | 1.8142 | 3.3641     | 0.49288014 | 115.3  | 6.0018 | 1.9131 | 1.1108 | 7.2308 | 1.1041 | 2.0961     | 0.46087902 |
| 70.4 | 1.6007 | 7.7716 | 5.8521 | 2.7627 | 8.4903 | 2.8508 | 0.93932284 | 85.4 | 2.1117 | 1.3892 | 2.2448 | 3.3086 | 8.0244 | 8.0681       | 0.17748739 | 100.4  | 4.8051 | 3.9826 | 3.0165 | 2.0068 | 2.3862 | 4.2061     | 0.49122726 | 115.4  | 6.4314 | 1.9388 | 1.1008 | 7.2308 | 1.1041 | 2.2461     | 0.45722528 |
| 70.5 | 1.6007 | 7.7716 | 5.8521 | 2.7627 | 8.4903 | 2.8508 | 0.93932284 | 85.5 | 2.0317 | 1.3892 | 2.2288 | 3.4466 | 8.0244 | 8.0681       | 0.17748739 | 100.5  | 4.9018 | 3.9826 | 3.0165 | 2.0068 | 2.3862 | 4.1721     | 0.49107611 | 115.5  | 6.0719 | 1.9444 | 1.2308 | 7.3008 | 1.1041 | 2.2461     | 0.45687929 |
| 70.6 | 1.6007 | 7.7716 | 5.8521 | 2.7627 | 8.4903 | 2.8508 | 0.93932284 | 85.6 | 2.1117 | 1.3892 | 2.2448 | 3.3086 | 8.0244 | 8.0681       | 0.17748739 | 100.6  | 4.8461 | 3.8116 | 3.1888 | 2.1008 | 2.3862 | 3.6681     | 0.49496976 | 115.6  | 7.0205 | 1.8388 | 1.2368 | 7.3008 | 1.2361 | 2.2361     | 0.45683883 |
| 70.7 | 1.6007 | 7.7716 | 5.8521 | 2.7627 | 8.4903 | 2.8508 | 0.93932284 | 85.7 | 2.2441 | 1.5216 | 2.8688 | 3.8118 | 1.0084 | 1.0110       | 0.77581489 | 100.7  | 5.2008 | 3.8668 | 3.1848 | 2.1008 | 2.3862 | 3.6711     | 0.49386362 | 115.7  | 8.2008 | 1.9208 | 1.5708 | 7.6208 | 1.6381 | 2.4661     | 0.46113856 |
| 70.8 | 1.6007 | 7.7716 | 5.8521 | 2.7627 | 8.4903 | 2.8508 | 0.93932284 | 85.8 | 2.2441 | 1.5216 | 2.8688 | 3.8118 | 1.0084 | 1.0110       | 0.77581489 | 100.8  | 5.0088 | 3.6668 | 3.1848 | 2.1008 | 2.3862 | 3.6711     | 0.49386362 | 115.8  | 8.2008 | 1.9208 | 1.5708 | 7.6208 | 1.6381 | 2.4661     | 0.46113856 |
| 70.9 | 1.6007 | 7.7716 | 5.8521 | 2.7627 | 8.4903 | 2.8508 | 0.93932284 | 85.9 | 2.0317 | 1.3892 | 2.2288 | 3.4466 | 8.0244 | 8.0681       | 0.17748739 | 100.9  | 5.0208 | 3.4468 | 3.1868 | 2.1888 | 2.3862 | 3.4461     | 0.49491663 | 115.9  | 9.3615 | 1.8908 | 1.5328 | 7.7608 | 1.6741 | 2.4661     | 0.46023471 |
| 71   | 1.8217 | 6.2316 | 8.9021 | 2.9007 | 6.0143 | 2.2008 | 0.93328121 | 86   | 1.8217 | 1.6718 | 3.9998 | 4.5786 | 7.5664 | 8.4461       | 0.78698301 | 101    | 5.4718 | 3.6668 | 3.8888 | 2.1468 | 2.7962 | 4.4081     | 0.49192406 | 116    | 1.9745 | 1.9131 | 1.5388 | 7.7308 | 1.8314 | 2.5561     | 0.45469002 |
| 71.1 | 1.8217 | 6.2316 | 8.9021 | 2.9007 | 6.0143 | 2.2008 | 0.93328121 | 86.1 | 1.8217 | 1.6718 | 3.9998 | 4.5786 | 7.5664 | 8.4461       | 0.78698301 | 101.1  | 5.4008 | 3.6668 | 3.8888 | 2.1468 | 2.7962 | 4.1581     | 0.49192406 | 116.1  | 1.9745 | 1.9131 | 1.5388 | 7.7308 | 1.8314 | 2.5561     | 0.45469002 |
| 71.2 | 1.8217 | 6.2316 | 8.9021 | 2.9007 | 6.0143 | 2.2008 | 0.93328121 | 86.2 | 1.8217 | 1.6718 | 3.9998 | 4.5786 | 7.5664 | 8.4461       | 0.78698301 | 101.2  | 5.3668 | 3.6668 | 3.8888 | 2.1468 | 2.7962 | 4.2081     | 0.49192406 | 116.2  | 1.9745 | 1.9131 | 1.5388 | 7.7308 | 1.8314 | 2.5561     | 0.45469002 |
| 71.3 | 1.8217 | 6.2316 | 8.9021 | 2.9007 | 6.0143 | 2.2008 | 0.93328121 | 86.3 | 2.0317 | 1.3892 | 2.2288 | 3.4466 | 8.0244 | 8.0681       | 0.17748739 | 101.3  | 5.3668 | 3.6668 | 3.8888 | 2.1468 | 2.7962 | 4.2081     | 0.49192406 | 116.3  | 1.9745 | 1.9131 | 1.5388 | 7.7308 | 1.8314 | 2.5561     | 0.45469002 |
| 71.4 | 1.8217 | 6.2316 | 8.9021 | 2.9007 | 6.0143 | 2.2008 | 0.93328121 | 86.4 | 2.0317 | 1.3892 | 2.2288 | 3.4466 | 8.0244 | 8.0681       | 0.17748739 | 101.4  | 5.0088 | 3.6668 | 3.1868 | 2.1008 | 2.3862 | 4.1581     | 0.49386362 | 116.4  | 1.9745 | 1.9131 | 1.5388 | 7.7308 | 1.8314 | 2.5561     | 0.45469002 |
| 71.5 | 1.8217 | 6.2316 | 8.9021 | 2.9007 | 6.0143 | 2.2008 | 0.93328121 | 86.5 | 2.1117 | 1.3892 | 2.2448 | 3.3086 | 8.0244 | 8.0681       | 0.17748739 | 101.5  | 5.3668 | 3.6668 | 3.1868 | 2.1008 | 2.3862 | 4.1581     | 0.49386362 | 116.5  | 1.9745 | 1.9131 | 1.5388 | 7.7308 | 1.8314 | 2.5561     | 0.45469002 |
| 71.6 | 1.8217 | 6.2316 | 8.9021 | 2.9007 | 6.0143 | 2.2008 | 0.93328121 | 86.6 | 2.1117 | 1.3892 | 2.2448 | 3.3086 | 8.0244 | 8.0681       | 0.17748739 | 101.6  | 5.3668 | 3.6668 | 3.1868 | 2.1008 | 2.3862 | 4.1581     | 0.49386362 | 116.6  | 1.9745 | 1.9131 | 1.5388 | 7.7308 | 1.8314 | 2.5561     | 0.45469002 |
| 71.7 | 1.8217 | 6.2316 | 8.9021 | 2.9007 | 6.0143 | 2.2008 | 0.93328121 | 86.7 | 2.1117 | 1.3892 | 2.2448 | 3.3086 | 8.0244 | 8.0681       | 0.17748739 | 101.7  | 5.3668 | 3.6668 | 3.1868 | 2.1008 | 2.3862 | 4.1581     | 0.49386362 | 116.7  | 1.9745 | 1.9131 | 1.5388 | 7.7308 | 1.8314 | 2.5561     | 0.45469002 |
| 71.8 | 1.8217 | 6.2316 | 8.9021 | 2.9007 | 6.0143 | 2.2008 | 0.93328121 | 86.8 | 2.1117 | 1.3892 | 2.2448 | 3.3086 | 8.0244 | 8.0681       | 0.17748739 | 101.8  | 5.3668 | 3.6668 | 3.1868 | 2.1008 | 2.3862 | 4.1581     | 0.49386362 | 116.8  | 1.9745 | 1.9131 | 1.5388 | 7.7308 | 1.8314 | 2.5561     | 0.45469002 |
| 71.9 | 1.8217 | 6.2316 | 8.9021 | 2.9007 | 6.0143 | 2.2008 | 0.93328121 | 86.9 | 2.1117 | 1.3892 | 2.2448 | 3.3086 | 8.0244 | 8.0681       | 0.17748739 | 101.9  | 5.3668 | 3.6668 | 3.1868 | 2.1008 | 2.3862 | 4.1581     | 0.49386362 | 116.9  | 1.9745 | 1.9131 | 1.5388 | 7.7308 | 1.8314 | 2.5561     | 0.45469002 |
| 72   | 1.4517 | 5.8716 | 1.2668 | 3.4267 | 6.0963 | 1.5108 | 0.94078891 | 87   | 2.3717 | 2.1116 | 3.5998 | 4.4906 | 8.6764 | 7.7281       | 0.17902889 | 102    | 5.6048 | 3.6668 | 3.8888 | 2.1468 | 2.7962 | 4.0181     | 0.49386362 | 117    | 1.9745 | 1.9131 | 1.5388 | 7.7308 | 1.8314 | 2.5561     | 0.45469002 |
| 72.1 | 1.4517 | 5.8716 | 1.2668 | 3.4267 | 6.0963 | 1.5108 | 0.94078891 | 87.1 | 2.3717 | 2.1116 | 3.5998 | 4.4906 | 8.6764 | 7.7281       | 0.17902889 | 102.1  | 5.6048 | 3.6668 | 3.8888 | 2.1468 | 2.7962 | 4.0181     | 0.49386362 | 117.1  | 1.9745 | 1.9131 | 1.5388 | 7.7308 | 1.8314 | 2.5561     | 0.45469002 |
| 72.2 | 1.4517 | 5.8716 | 1.2668 | 3.4267 | 6.0963 | 1.5108 | 0.94078891 | 87.2 | 2.3717 | 2.1116 | 3.5998 | 4.4906 | 8.6764 | 7.7281       | 0.17902889 | 102.2  | 5.6048 | 3.6668 | 3.8888 | 2.1468 | 2.7962 | 4.0181     | 0.49386362 | 117.2  | 1.9745 | 1.9131 | 1.5388 | 7.7308 | 1.8314 | 2.5561     | 0.45469002 |
| 72.3 | 1.4517 | 5.8716 | 1.2668 | 3.4267 | 6.0963 | 1.5108 | 0.94078891 | 87.3 | 2.3717 | 2.1116 | 3.5998 | 4.4906 | 8.6764 | 7.7281       | 0.17902889 | 102.3  | 5.6048 | 3.6668 | 3.8888 | 2.1468 | 2.7962 | 4.0181     | 0.49386362 | 117.3  | 1.9745 | 1.9131 | 1.5388 | 7.7308 | 1.8314 | 2.5561     | 0.45469002 |
| 72   |        |        |        |        |        |        |            |      |        |        |        |        |        |              |            |        |        |        |        |        |        |            |            |        |        |        |        |        |        |            |            |

|       |          |          |          |            |          |          |            |       |          |          |          |            |          |          |            |       |          |          |          |            |          |          |            |       |          |          |          |            |          |          |            |
|-------|----------|----------|----------|------------|----------|----------|------------|-------|----------|----------|----------|------------|----------|----------|------------|-------|----------|----------|----------|------------|----------|----------|------------|-------|----------|----------|----------|------------|----------|----------|------------|
| 136.1 | 7.61E-14 | 7.30E-15 | 1.25E-12 | 0.00019994 | 1.28E-04 | 2.81E-11 | 0.38152227 | 141.1 | 9.56E-13 | 8.92E-14 | 6.24E-12 | 0.00022963 | 1.91E-39 | 1.64E-11 | 0.34882403 | 156.1 | 6.43E-12 | 1.34E-13 | 3.35E-11 | 0.00038103 | 8.08E-39 | 1.27E-11 | 0.23211955 | 171.1 | 1.85E-13 | 2.47E-13 | 1.19E-10 | 0.00077654 | 2.94E-38 | 1.14E-11 | 0.24702327 |
| 136.2 | 7.33E-14 | 7.18E-15 | 1.28E-12 | 0.00019993 | 1.21E-04 | 2.81E-11 | 0.38255445 | 141.2 | 9.29E-13 | 8.67E-14 | 6.46E-12 | 0.00021906 | 1.82E-39 | 1.58E-11 | 0.34608737 | 156.2 | 6.43E-12 | 1.34E-13 | 3.35E-11 | 0.00038103 | 8.08E-39 | 1.27E-11 | 0.23211955 | 171.2 | 1.90E-13 | 2.59E-13 | 1.21E-10 | 0.00077864 | 2.91E-38 | 1.15E-11 | 0.24681288 |
| 136.3 | 7.53E-14 | 7.18E-15 | 1.28E-12 | 0.00019997 | 1.21E-04 | 2.81E-11 | 0.38028172 | 141.3 | 9.31E-13 | 8.11E-14 | 6.67E-12 | 0.00022015 | 1.96E-39 | 1.56E-11 | 0.34200934 | 156.3 | 6.43E-12 | 1.34E-13 | 3.35E-11 | 0.00038103 | 8.08E-39 | 1.27E-11 | 0.23211955 | 171.3 | 1.90E-13 | 2.59E-13 | 1.24E-10 | 0.00077484 | 2.90E-38 | 1.14E-11 | 0.25104913 |
| 136.4 | 7.56E-14 | 7.38E-15 | 1.29E-12 | 0.00012001 | 1.14E-04 | 2.84E-11 | 0.38240703 | 141.4 | 9.64E-13 | 8.15E-14 | 6.98E-12 | 0.00021029 | 2.02E-39 | 1.65E-11 | 0.34860558 | 156.4 | 6.70E-12 | 1.36E-13 | 3.20E-11 | 0.00038895 | 8.39E-39 | 1.18E-11 | 0.23112004 | 171.4 | 1.90E-13 | 2.59E-13 | 1.24E-10 | 0.00077484 | 2.90E-38 | 1.14E-11 | 0.25104913 |
| 136.5 | 7.49E-14 | 7.26E-15 | 1.29E-12 | 0.00021127 | 1.27E-04 | 2.79E-11 | 0.38041181 | 141.5 | 9.79E-13 | 8.05E-14 | 7.01E-12 | 0.00021077 | 2.07E-39 | 1.63E-11 | 0.34203075 | 156.5 | 6.68E-12 | 1.36E-13 | 3.27E-11 | 0.00039248 | 8.39E-39 | 1.17E-11 | 0.235636   | 171.5 | 1.87E-13 | 2.22E-13 | 1.27E-10 | 0.00077361 | 2.67E-38 | 1.13E-11 | 0.25081517 |
| 136.6 | 7.08E-14 | 7.21E-15 | 1.29E-12 | 0.00019997 | 1.27E-04 | 2.79E-11 | 0.37990513 | 141.6 | 9.79E-13 | 8.05E-14 | 7.01E-12 | 0.00021077 | 2.07E-39 | 1.63E-11 | 0.34203075 | 156.6 | 6.68E-12 | 1.36E-13 | 3.27E-11 | 0.00039248 | 8.39E-39 | 1.17E-11 | 0.235636   | 171.6 | 1.87E-13 | 2.22E-13 | 1.27E-10 | 0.00077361 | 2.67E-38 | 1.13E-11 | 0.25081517 |
| 136.7 | 8.06E-14 | 7.05E-15 | 1.29E-12 | 0.00021001 | 1.24E-04 | 2.77E-11 | 0.37977951 | 141.7 | 1.00E-12 | 8.25E-14 | 7.05E-12 | 0.00021151 | 2.11E-39 | 1.64E-11 | 0.34206480 | 156.7 | 6.68E-12 | 1.36E-13 | 3.27E-11 | 0.00039248 | 8.39E-39 | 1.17E-11 | 0.235636   | 171.7 | 1.91E-13 | 2.22E-13 | 1.33E-10 | 0.00077523 | 2.95E-38 | 1.12E-11 | 0.24680055 |
| 136.8 | 9.18E-14 | 7.31E-15 | 1.39E-12 | 0.00019979 | 1.29E-04 | 2.99E-11 | 0.37992933 | 141.8 | 1.00E-12 | 8.25E-14 | 7.05E-12 | 0.00021151 | 2.11E-39 | 1.64E-11 | 0.34206480 | 156.8 | 6.68E-12 | 1.36E-13 | 3.27E-11 | 0.00039248 | 8.39E-39 | 1.17E-11 | 0.235636   | 171.8 | 2.00E-13 | 2.32E-13 | 1.35E-10 | 0.00077377 | 2.89E-38 | 1.13E-11 | 0.24680055 |
| 136.9 | 8.06E-14 | 7.05E-15 | 1.39E-12 | 0.00019984 | 1.46E-04 | 3.11E-11 | 0.37977951 | 141.9 | 1.01E-12 | 8.25E-14 | 7.05E-12 | 0.00021151 | 2.11E-39 | 1.64E-11 | 0.34206480 | 156.9 | 6.68E-12 | 1.36E-13 | 3.27E-11 | 0.00039248 | 8.39E-39 | 1.17E-11 | 0.235636   | 171.9 | 2.01E-13 | 2.32E-13 | 1.35E-10 | 0.00077523 | 2.95E-38 | 1.12E-11 | 0.24680055 |
| 137.0 | 9.21E-14 | 7.47E-15 | 1.40E-12 | 0.0001429  | 1.41E-04 | 3.15E-11 | 0.38129299 | 142.0 | 1.00E-12 | 8.25E-14 | 7.05E-12 | 0.00021151 | 2.11E-39 | 1.64E-11 | 0.34206480 | 157.0 | 6.68E-12 | 1.36E-13 | 3.27E-11 | 0.00039248 | 8.39E-39 | 1.17E-11 | 0.235636   | 172.0 | 2.01E-13 | 2.32E-13 | 1.32E-10 | 0.00077523 | 2.95E-38 | 1.13E-11 | 0.24680055 |
| 137.1 | 9.21E-14 | 7.51E-15 | 1.41E-12 | 0.0001551  | 1.41E-04 | 3.15E-11 | 0.38115511 | 142.1 | 1.00E-12 | 8.25E-14 | 7.05E-12 | 0.00021151 | 2.11E-39 | 1.64E-11 | 0.34206480 | 157.1 | 6.71E-12 | 1.35E-13 | 3.50E-11 | 0.00037666 | 8.82E-39 | 1.25E-11 | 0.2391354  | 172.1 | 2.01E-13 | 2.41E-13 | 1.37E-10 | 0.00077474 | 3.12E-38 | 1.13E-11 | 0.25104913 |
| 137.2 | 9.04E-14 | 7.45E-15 | 1.37E-12 | 0.0001727  | 1.53E-04 | 3.10E-11 | 0.38133733 | 142.2 | 1.01E-12 | 8.24E-14 | 7.01E-12 | 0.00020951 | 1.80E-39 | 1.57E-11 | 0.34205661 | 157.2 | 6.72E-12 | 1.35E-13 | 3.60E-11 | 0.00037867 | 8.90E-39 | 1.25E-11 | 0.2410106  | 172.2 | 2.01E-13 | 2.41E-13 | 1.37E-10 | 0.00077474 | 3.12E-38 | 1.13E-11 | 0.25104913 |
| 137.3 | 9.72E-14 | 7.23E-15 | 1.41E-12 | 0.0001771  | 1.62E-04 | 3.04E-11 | 0.38338365 | 142.3 | 1.00E-12 | 8.24E-14 | 7.01E-12 | 0.00020951 | 1.80E-39 | 1.57E-11 | 0.34205661 | 157.3 | 6.72E-12 | 1.35E-13 | 3.60E-11 | 0.00037867 | 8.90E-39 | 1.25E-11 | 0.2410106  | 172.3 | 2.01E-13 | 2.41E-13 | 1.37E-10 | 0.00077474 | 3.12E-38 | 1.13E-11 | 0.25104913 |
| 137.4 | 1.01E-13 | 7.01E-15 | 1.43E-12 | 0.0002007  | 1.68E-04 | 3.00E-11 | 0.383479   | 142.4 | 1.10E-12 | 8.40E-14 | 7.38E-12 | 0.00021326 | 1.95E-39 | 1.61E-11 | 0.34203796 | 157.4 | 6.97E-12 | 1.46E-13 | 3.61E-11 | 0.00037773 | 8.79E-39 | 1.18E-11 | 0.24202525 | 172.4 | 2.01E-13 | 2.45E-13 | 1.39E-10 | 0.00077361 | 3.46E-38 | 1.11E-11 | 0.25201733 |
| 137.5 | 1.01E-13 | 6.85E-15 | 1.47E-12 | 0.00021299 | 1.69E-04 | 2.99E-11 | 0.38097793 | 142.5 | 1.11E-12 | 8.28E-14 | 7.28E-12 | 0.00021248 | 1.97E-39 | 1.64E-11 | 0.34202941 | 157.5 | 6.95E-12 | 1.50E-13 | 3.72E-11 | 0.00037477 | 8.77E-39 | 1.17E-11 | 0.24192328 | 172.5 | 2.11E-13 | 2.50E-13 | 1.45E-10 | 0.00077851 | 3.46E-38 | 1.12E-11 | 0.25162428 |
| 137.6 | 1.11E-13 | 6.99E-15 | 1.55E-12 | 0.00020451 | 1.75E-04 | 2.94E-11 | 0.37997707 | 142.6 | 1.24E-12 | 8.81E-14 | 7.78E-12 | 0.00021286 | 1.96E-39 | 1.70E-11 | 0.34205288 | 157.6 | 6.95E-12 | 1.50E-13 | 3.72E-11 | 0.00037477 | 8.77E-39 | 1.17E-11 | 0.24192328 | 172.6 | 2.11E-13 | 2.50E-13 | 1.49E-10 | 0.00077668 | 3.49E-38 | 1.13E-11 | 0.25162428 |
| 137.7 | 1.19E-13 | 7.20E-15 | 1.64E-12 | 0.00021252 | 1.91E-04 | 3.08E-11 | 0.37946107 | 142.7 | 1.16E-12 | 8.81E-14 | 7.78E-12 | 0.00021286 | 1.96E-39 | 1.70E-11 | 0.34205288 | 157.7 | 6.95E-12 | 1.50E-13 | 3.72E-11 | 0.00037477 | 8.77E-39 | 1.17E-11 | 0.24192328 | 172.7 | 2.11E-13 | 2.50E-13 | 1.49E-10 | 0.00077668 | 3.49E-38 | 1.13E-11 | 0.25162428 |
| 137.8 | 1.23E-13 | 7.01E-15 | 1.72E-12 | 0.00017208 | 1.85E-04 | 3.10E-11 | 0.37973998 | 142.8 | 1.27E-12 | 8.54E-14 | 8.00E-12 | 0.00020374 | 2.14E-39 | 1.77E-11 | 0.34212034 | 157.8 | 6.91E-12 | 1.60E-13 | 4.24E-11 | 0.00039942 | 1.09E-38 | 1.20E-11 | 0.23899048 | 172.8 | 2.11E-13 | 2.50E-13 | 1.57E-10 | 0.00077469 | 3.58E-38 | 1.08E-11 | 0.25151733 |
| 137.9 | 1.24E-13 | 6.97E-15 | 1.72E-12 | 0.00017209 | 1.85E-04 | 3.10E-11 | 0.37973998 | 142.9 | 1.27E-12 | 8.54E-14 | 8.00E-12 | 0.00020374 | 2.14E-39 | 1.77E-11 | 0.34212034 | 157.9 | 6.91E-12 | 1.60E-13 | 4.24E-11 | 0.00039942 | 1.09E-38 | 1.20E-11 | 0.23899048 | 172.9 | 2.11E-13 | 2.50E-13 | 1.57E-10 | 0.00077469 | 3.58E-38 | 1.08E-11 | 0.25151733 |
| 138.1 | 1.24E-13 | 6.97E-15 | 1.72E-12 | 0.00017209 | 1.85E-04 | 3.10E-11 | 0.37973998 | 143.0 | 1.30E-12 | 8.48E-14 | 8.21E-12 | 0.00020379 | 2.23E-39 | 1.75E-11 | 0.34966674 | 158.1 | 6.98E-12 | 1.56E-13 | 4.29E-11 | 0.00040687 | 1.01E-38 | 1.19E-11 | 0.24371389 | 173.1 | 2.11E-13 | 2.40E-13 | 1.57E-10 | 0.00077361 | 3.39E-38 | 1.06E-11 | 0.25177393 |
| 138.2 | 1.23E-13 | 6.91E-15 | 1.79E-12 | 0.00012517 | 1.90E-04 | 2.99E-11 | 0.37842226 | 143.1 | 1.40E-12 | 8.60E-14 | 8.30E-12 | 0.00020465 | 2.50E-39 | 1.71E-11 | 0.34709778 | 158.2 | 6.42E-12 | 1.60E-13 | 4.29E-11 | 0.00040687 | 1.09E-38 | 1.19E-11 | 0.24371389 | 173.2 | 2.21E-13 | 2.40E-13 | 1.59E-10 | 0.00077931 | 3.39E-38 | 1.05E-11 | 0.25177393 |
| 138.3 | 1.34E-13 | 7.46E-15 | 1.79E-12 | 0.00012517 | 2.10E-04 | 3.01E-11 | 0.37820709 | 143.2 | 1.38E-12 | 8.47E-14 | 8.30E-12 | 0.00020464 | 2.11E-39 | 1.65E-11 | 0.34704772 | 158.3 | 6.50E-12 | 1.58E-13 | 4.19E-11 | 0.00040605 | 1.05E-38 | 1.18E-11 | 0.24407602 | 173.3 | 2.21E-13 | 2.40E-13 | 1.59E-10 | 0.00077931 | 3.39E-38 | 1.05E-11 | 0.25177393 |
| 138.4 | 1.32E-13 | 7.35E-15 | 1.76E-12 | 0.0002179  | 1.98E-04 | 2.96E-11 | 0.37969335 | 143.3 | 1.28E-12 | 8.43E-14 | 8.65E-12 | 0.00020491 | 2.12E-39 | 1.67E-11 | 0.34205776 | 158.4 | 6.21E-12 | 1.62E-13 | 4.19E-11 | 0.00042433 | 9.01E-38 | 1.15E-11 | 0.24488773 | 173.4 | 2.21E-13 | 2.40E-13 | 1.60E-10 | 0.00077863 | 3.08E-38 | 9.86E-12 | 0.25650545 |
| 138.5 | 1.22E-13 | 7.45E-15 | 1.72E-12 | 0.00012548 | 1.98E-04 | 2.98E-11 | 0.37427929 | 143.4 | 1.33E-12 | 8.79E-14 | 8.91E-12 | 0.00020539 | 2.13E-39 | 1.62E-11 | 0.34203741 | 158.5 | 6.44E-12 | 1.67E-13 | 4.29E-11 | 0.00042433 | 9.01E-38 | 1.15E-11 | 0.24488773 | 173.5 | 2.21E-13 | 2.40E-13 | 1.60E-10 | 0.00077863 | 3.08E-38 | 9.86E-12 | 0.25650545 |
| 138.6 | 1.28E-13 | 7.59E-15 | 1.90E-12 | 0.00021972 | 1.99E-04 | 2.98E-11 | 0.38087783 | 143.5 | 1.41E-12 | 8.95E-14 | 9.16E-12 | 0.00020524 | 2.21E-39 | 1.64E-11 | 0.34207966 | 158.6 | 6.34E-12 | 1.62E-13 | 4.17E-11 | 0.00042433 | 9.01E-38 | 1.15E-11 | 0.24488773 | 173.6 | 2.21E-13 | 2.40E-13 | 1.60E-10 | 0.00077863 | 3.08E-38 | 9.86E-12 | 0.25650545 |
| 138.7 | 1.29E-13 | 7.41E-15 | 1.95E-12 | 0.00012916 | 1.83E-04 | 2.83E-11 | 0.37010884 | 143.6 | 1.40E-12 | 8.95E-14 | 9.16E-12 | 0.00020524 | 2.21E-39 | 1.64E-11 | 0.34207966 | 158.7 | 6.24E-12 | 1.63E-13 | 4.11E-11 | 0.00042899 | 1.07E-38 | 1.17E-11 | 0.24466288 | 173.7 | 2.21E-13 | 2.40E-13 | 1.61E-10 | 0.00077466 | 2.99E-38 | 9.66E-12 | 0.25626481 |
| 138.8 | 1.38E-13 | 6.97E-15 | 1.96E-12 | 0.00021776 | 2.09E-04 | 2.89E-11 | 0.38239299 | 143.7 | 1.40E-12 | 8.95E-14 | 9.16E-12 | 0.00020524 | 2.21E-39 | 1.64E-11 | 0.34207966 | 158.8 | 6.24E-12 | 1.63E-13 | 4.11E-11 | 0.00042899 | 1.07E-38 | 1.17E-11 | 0.24466288 | 173.8 | 2.21E-13 | 2.40E-13 | 1.61E-10 | 0.00077466 | 2.99E-38 | 9.66E-12 | 0.25626481 |
| 138.9 | 1.36E-13 | 7.00E-15 | 1.87E-12 | 0.00021466 | 1.97E-04 | 2.79E-11 | 0.38244838 | 143.8 | 1.29E-12 | 8.46E-14 | 9.70E-12 | 0.00020549 | 1.96E-39 | 1.51E-11 | 0.34254545 | 158.9 | 6.18E-12 | 1.63E-13 | 4.12E-11 | 0.00042475 | 1.03E-38 | 1.17E-11 | 0.24466288 | 173.9 | 2.21E-13 | 2.40E-13 | 1.61E-10 | 0.00077466 | 2.99E-38 | 9.66E-12 | 0.25626481 |
| 139.0 | 1.36E-13 | 7.76E-15 | 2.09E-12 | 0.00012723 | 1.90E-04 | 2.69E-11 | 0.38332162 | 143.9 | 1.16E-12 | 8.45E-14 | 9.84E-12 | 0.00020501 | 1.69E-39 | 1.42E-11 | 0.34292548 | 159.0 | 6.21E-12 | 1.65E-13 | 4.14E-11 | 0.00042474 | 1.03E-38 | 1.11E-11 | 0.24488777 | 174.0 | 2.41E-13 | 2.16E-13 | 1.65E-10 | 0.00077866 | 3.02E-38 | 9.53E-12 | 0.25654858 |
| 139.1 | 1.29E-13 | 7.76E-15 | 2.09E-12 | 0.00012723 | 1.90E-04 |          |            |       |          |          |          |            |          |          |            |       |          |          |          |            |          |          |            |       |          |          |          |            |          |          |            |





|     |           |           |            |           |            |           |            |            |
|-----|-----------|-----------|------------|-----------|------------|-----------|------------|------------|
| 60  | 0.3257004 | 0.1659001 | -0.1312000 | 0.6477000 | -0.7826300 | 0.6434580 | -0.0022030 | 0.0082480  |
| 61  | 0.3379888 | 0.1644396 | -0.1310888 | 0.6467000 | -0.7826700 | 0.6424728 | -0.0020300 | 0.0084884  |
| 62  | 0.3506765 | 0.1702527 | -0.1311778 | 0.6459000 | -0.7827800 | 0.6420000 | -0.0020500 | 0.0082600  |
| 63  | 0.3572777 | 0.1750257 | -0.1312577 | 0.6451000 | -0.7828700 | 0.6416279 | -0.0020700 | 0.0080444  |
| 64  | 0.3636199 | 0.1797474 | -0.1313377 | 0.6442000 | -0.7829600 | 0.6412558 | -0.0020900 | 0.0078288  |
| 65  | 0.3697268 | 0.1845666 | -0.1314177 | 0.6433000 | -0.7830500 | 0.6408837 | -0.0021100 | 0.0076132  |
| 66  | 0.3756344 | 0.1893858 | -0.1314977 | 0.6424000 | -0.7831400 | 0.6405116 | -0.0021300 | 0.0073976  |
| 67  | 0.3813878 | 0.1942050 | -0.1315777 | 0.6415000 | -0.7832300 | 0.6401395 | -0.0021500 | 0.0071820  |
| 68  | 0.3870262 | 0.1990242 | -0.1316577 | 0.6406000 | -0.7833200 | 0.6397674 | -0.0021700 | 0.0069664  |
| 69  | 0.3925998 | 0.2038434 | -0.1317377 | 0.6397000 | -0.7834100 | 0.6393953 | -0.0021900 | 0.0067508  |
| 70  | 0.3981284 | 0.2086626 | -0.1318177 | 0.6388000 | -0.7835000 | 0.6390232 | -0.0022100 | 0.0065352  |
| 71  | 0.4036270 | 0.2134818 | -0.1318977 | 0.6379000 | -0.7835900 | 0.6386511 | -0.0022300 | 0.0063196  |
| 72  | 0.4091056 | 0.2183010 | -0.1319777 | 0.6370000 | -0.7836800 | 0.6382790 | -0.0022500 | 0.0061040  |
| 73  | 0.4145642 | 0.2231202 | -0.1320577 | 0.6361000 | -0.7837700 | 0.6379069 | -0.0022700 | 0.0058884  |
| 74  | 0.4200028 | 0.2279394 | -0.1321377 | 0.6352000 | -0.7838600 | 0.6375348 | -0.0022900 | 0.0056728  |
| 75  | 0.4254214 | 0.2327586 | -0.1322177 | 0.6343000 | -0.7839500 | 0.6371627 | -0.0023100 | 0.0054572  |
| 76  | 0.4308200 | 0.2375778 | -0.1322977 | 0.6334000 | -0.7840400 | 0.6367906 | -0.0023300 | 0.0052416  |
| 77  | 0.4361986 | 0.2423970 | -0.1323777 | 0.6325000 | -0.7841300 | 0.6364185 | -0.0023500 | 0.0050260  |
| 78  | 0.4415572 | 0.2472162 | -0.1324577 | 0.6316000 | -0.7842200 | 0.6360464 | -0.0023700 | 0.0048104  |
| 79  | 0.4468958 | 0.2520354 | -0.1325377 | 0.6307000 | -0.7843100 | 0.6356743 | -0.0023900 | 0.0045948  |
| 80  | 0.4522144 | 0.2568546 | -0.1326177 | 0.6298000 | -0.7844000 | 0.6353022 | -0.0024100 | 0.0043792  |
| 81  | 0.4575130 | 0.2616738 | -0.1326977 | 0.6289000 | -0.7844900 | 0.6349301 | -0.0024300 | 0.0041636  |
| 82  | 0.4627916 | 0.2664930 | -0.1327777 | 0.6280000 | -0.7845800 | 0.6345580 | -0.0024500 | 0.0039480  |
| 83  | 0.4680502 | 0.2713122 | -0.1328577 | 0.6271000 | -0.7846700 | 0.6341859 | -0.0024700 | 0.0037324  |
| 84  | 0.4732888 | 0.2761314 | -0.1329377 | 0.6262000 | -0.7847600 | 0.6338138 | -0.0024900 | 0.0035168  |
| 85  | 0.4785074 | 0.2809506 | -0.1330177 | 0.6253000 | -0.7848500 | 0.6334417 | -0.0025100 | 0.0033012  |
| 86  | 0.4837060 | 0.2857698 | -0.1330977 | 0.6244000 | -0.7849400 | 0.6330696 | -0.0025300 | 0.0030856  |
| 87  | 0.4888846 | 0.2905890 | -0.1331777 | 0.6235000 | -0.7850300 | 0.6326975 | -0.0025500 | 0.0028700  |
| 88  | 0.4940432 | 0.2954082 | -0.1332577 | 0.6226000 | -0.7851200 | 0.6323254 | -0.0025700 | 0.0026544  |
| 89  | 0.4991818 | 0.3002274 | -0.1333377 | 0.6217000 | -0.7852100 | 0.6319533 | -0.0025900 | 0.0024388  |
| 90  | 0.5042904 | 0.3050466 | -0.1334177 | 0.6208000 | -0.7853000 | 0.6315812 | -0.0026100 | 0.0022232  |
| 91  | 0.5093790 | 0.3098658 | -0.1334977 | 0.6199000 | -0.7853900 | 0.6312091 | -0.0026300 | 0.0020076  |
| 92  | 0.5144476 | 0.3146850 | -0.1335777 | 0.6190000 | -0.7854800 | 0.6308370 | -0.0026500 | 0.0017920  |
| 93  | 0.5194962 | 0.3195042 | -0.1336577 | 0.6181000 | -0.7855700 | 0.6304649 | -0.0026700 | 0.0015764  |
| 94  | 0.5245248 | 0.3243234 | -0.1337377 | 0.6172000 | -0.7856600 | 0.6300928 | -0.0026900 | 0.0013608  |
| 95  | 0.5295334 | 0.3291426 | -0.1338177 | 0.6163000 | -0.7857500 | 0.6297207 | -0.0027100 | 0.0011452  |
| 96  | 0.5345220 | 0.3339618 | -0.1338977 | 0.6154000 | -0.7858400 | 0.6293486 | -0.0027300 | 0.0009296  |
| 97  | 0.5394906 | 0.3387810 | -0.1339777 | 0.6145000 | -0.7859300 | 0.6289765 | -0.0027500 | 0.0007140  |
| 98  | 0.5444392 | 0.3436002 | -0.1340577 | 0.6136000 | -0.7860200 | 0.6286044 | -0.0027700 | 0.0004984  |
| 99  | 0.5493678 | 0.3484194 | -0.1341377 | 0.6127000 | -0.7861100 | 0.6282323 | -0.0027900 | 0.0002828  |
| 100 | 0.5542764 | 0.3532386 | -0.1342177 | 0.6118000 | -0.7862000 | 0.6278602 | -0.0028100 | 0.0000672  |
| 101 | 0.5591650 | 0.3580578 | -0.1342977 | 0.6109000 | -0.7862900 | 0.6274881 | -0.0028300 | -0.0001484 |
| 102 | 0.5640336 | 0.3628770 | -0.1343777 | 0.6100000 | -0.7863800 | 0.6271160 | -0.0028500 | -0.0003328 |
| 103 | 0.5688822 | 0.3676962 | -0.1344577 | 0.6091000 | -0.7864700 | 0.6267439 | -0.0028700 | -0.0005172 |
| 104 | 0.5737108 | 0.3725154 | -0.1345377 | 0.6082000 | -0.7865600 | 0.6263718 | -0.0028900 | -0.0007016 |
| 105 | 0.5785194 | 0.3773346 | -0.1346177 | 0.6073000 | -0.7866500 | 0.6260000 | -0.0029100 | -0.0008860 |
| 106 | 0.5833080 | 0.3821538 | -0.1346977 | 0.6064000 | -0.7867400 | 0.6256279 | -0.0029300 | -0.0010704 |
| 107 | 0.5880766 | 0.3869730 | -0.1347777 | 0.6055000 | -0.7868300 | 0.6252558 | -0.0029500 | -0.0012548 |
| 108 | 0.5928252 | 0.3917922 | -0.1348577 | 0.6046000 | -0.7869200 | 0.6248837 | -0.0029700 | -0.0014392 |
| 109 | 0.5975538 | 0.3966114 | -0.1349377 | 0.6037000 | -0.7870100 | 0.6245116 | -0.0029900 | -0.0016236 |
| 110 | 0.6022624 | 0.4014306 | -0.1350177 | 0.6028000 | -0.7871000 | 0.6241395 | -0.0030100 | -0.0018080 |
| 111 | 0.6069510 | 0.4062498 | -0.1350977 | 0.6019000 | -0.7871900 | 0.6237674 | -0.0030300 | -0.0019924 |
| 112 | 0.6116196 | 0.4110690 | -0.1351777 | 0.6010000 | -0.7872800 | 0.6233953 | -0.0030500 | -0.0021768 |
| 113 | 0.6162682 | 0.4158882 | -0.1352577 | 0.6001000 | -0.7873700 | 0.6230232 | -0.0030700 | -0.0023612 |
| 114 | 0.6208968 | 0.4207074 | -0.1353377 | 0.5992000 | -0.7874600 | 0.6226511 | -0.0030900 | -0.0025456 |
| 115 | 0.6255054 | 0.4255266 | -0.1354177 | 0.5983000 | -0.7875500 | 0.6222790 | -0.0031100 | -0.0027300 |
| 116 | 0.6300940 | 0.4303458 | -0.1354977 | 0.5974000 | -0.7876400 | 0.6219069 | -0.0031300 | -0.0029144 |
| 117 | 0.6346626 | 0.4351650 | -0.1355777 | 0.5965000 | -0.7877300 | 0.6215348 | -0.0031500 | -0.0030988 |
| 118 | 0.6392112 | 0.4400000 | -0.1356577 | 0.5956000 | -0.7878200 | 0.6211627 | -0.0031700 | -0.0032832 |
| 119 | 0.6437398 | 0.4448292 | -0.1357377 | 0.5947000 | -0.7879100 | 0.6207906 | -0.0031900 | -0.0034676 |
| 120 | 0.6482484 | 0.4496684 | -0.1358177 | 0.5938000 | -0.7880000 | 0.6204185 | -0.0032100 | -0.0036520 |
| 121 | 0.6527270 | 0.4545076 | -0.1358977 | 0.5929000 | -0.7880900 | 0.6200464 | -0.0032300 | -0.0038364 |
| 122 | 0.6571856 | 0.4593468 | -0.1359777 | 0.5920000 | -0.7881800 | 0.6196743 | -0.0032500 | -0.0040208 |
| 123 | 0.6616242 | 0.4641860 | -0.1360577 | 0.5911000 | -0.7882700 | 0.6193022 | -0.0032700 | -0.0042052 |
| 124 | 0.6660428 | 0.4690252 | -0.1361377 | 0.5902000 | -0.7883600 | 0.6189301 | -0.0032900 | -0.0043896 |
| 125 | 0.6704414 | 0.4738644 | -0.1362177 | 0.5893000 | -0.7884500 | 0.6185580 | -0.0033100 | -0.0045740 |
| 126 | 0.6748200 | 0.4787036 | -0.1362977 | 0.5884000 | -0.7885400 | 0.6181859 | -0.0033300 | -0.0047584 |
| 127 | 0.6791786 | 0.4835428 | -0.1363777 | 0.5875000 | -0.7886300 | 0.6178138 | -0.0033500 | -0.0049428 |
| 128 | 0.6835172 | 0.4883820 | -0.1364577 | 0.5866000 | -0.7887200 | 0.6174417 | -0.0033700 | -0.0051272 |
| 129 | 0.6878358 | 0.4932212 | -0.1365377 | 0.5857000 | -0.7888100 | 0.6170696 | -0.0033900 | -0.0053116 |
| 130 | 0.6921344 | 0.4980604 | -0.1366177 | 0.5848000 | -0.7889000 | 0.6166975 | -0.0034100 | -0.0054960 |
| 131 | 0.6964130 | 0.5028996 | -0.1366977 | 0.5839000 | -0.7889900 | 0.6163254 | -0.0034300 | -0.0056804 |
| 132 | 0.7006716 | 0.5077388 | -0.1367777 | 0.5830000 | -0.7890800 | 0.6159533 | -0.0034500 | -0.0058648 |
| 133 | 0.7049102 | 0.5125780 | -0.1368577 | 0.5821000 | -0.7891700 | 0.6155812 | -0.0034700 | -0.0060492 |
| 134 | 0.7091288 | 0.5174172 | -0.1369377 | 0.5812000 | -0.7892600 | 0.6152091 | -0.0034900 | -0.0062336 |
| 135 | 0.7133274 | 0.5222564 | -0.1370177 | 0.5803000 | -0.7893500 | 0.6148370 | -0.0035100 | -0.0064180 |
| 136 | 0.7175060 | 0.5270956 | -0.1370977 | 0.5794000 | -0.7894400 | 0.6144649 | -0.0035300 | -0.0066024 |
| 137 | 0.7216646 | 0.5319348 | -0.1371777 | 0.5785000 | -0.7895300 | 0.6140928 | -0.0035500 | -0.0067868 |
| 138 | 0.7258032 | 0.5367740 | -0.1372577 | 0.5776000 | -0.7896200 | 0.6137207 | -0.0035700 | -0.0069712 |
| 139 | 0.7299218 | 0.5416132 | -0.1373377 | 0.5767000 | -0.7897100 | 0.6133486 | -0.0035900 | -0.0071556 |
| 140 | 0.7340204 | 0.5464524 | -0.1374177 | 0.5758000 | -0.7898000 | 0.6129765 | -0.0036100 | -0.0073400 |
| 141 | 0.7380990 | 0.5512916 | -0.1374977 | 0.5749000 | -0.7898900 | 0.6126044 | -0.0036300 | -0.0075244 |
| 142 | 0.7421576 | 0.5561308 | -0.1375777 | 0.5740000 | -0.7899800 | 0.6122323 | -0.0036500 | -0.0077088 |
| 143 | 0.7461962 | 0.5609700 | -0.1376577 | 0.5731000 | -0.7900700 | 0.6118602 | -0.0036700 | -0.0078932 |
| 144 | 0.7502148 | 0.5658092 | -0.1377377 | 0.5722000 | -0.7901600 | 0.6114881 | -0.0036900 | -0.0080776 |
| 145 | 0.7542134 | 0.5706484 | -0.1378177 | 0.5713000 | -0.7902500 | 0.6111160 | -0.0037100 | -0.0082620 |
| 146 | 0.7581920 | 0.5754876 | -0.1378977 | 0.5704000 | -0.7903400 | 0.6107439 | -0.0037300 | -0.0084464 |
| 147 | 0.7621506 | 0.5803268 | -0.1379777 | 0.5695000 | -0.7904300 | 0.6103718 | -0.0037500 | -0.0086308 |
| 148 | 0.7660892 | 0.5851660 | -0.1380577 | 0.5686000 | -0.7905200 | 0.6100000 | -0.0037700 | -0.0088152 |
| 149 | 0.7700078 | 0.5900052 | -0.1381377 | 0.5677000 | -0.7906100 | 0.6096279 | -0.0037900 | -0.0090000 |
| 150 | 0.7739064 | 0.5948444 | -0.1382177 | 0.5668000 | -0.7907000 | 0.6092558 | -0.0038100 | -0.0091844 |
| 151 | 0.7777850 | 0.5996836 | -0.1382977 | 0.5659000 | -0.7907900 | 0.6088837 | -0.0038300 | -0.0093688 |
| 152 | 0.7816436 | 0.6045228 | -0.1383777 | 0.5650000 | -0.7908800 | 0.6085116 | -0.0038500 | -0.0095532 |
| 153 | 0.7854822 | 0.6093620 | -0.1384577 | 0.5641000 | -0.7909700 | 0.6081395 | -0.0038700 | -0.0097376 |
| 154 | 0.7893008 | 0.6142012 | -0.1385377 | 0.5632000 | -0.7910600 | 0.6077674 | -0.0038900 | -0.0099220 |
| 155 | 0.7930994 | 0.6190404 | -0.1386177 | 0.5623000 | -0.7911500 | 0.6073953 | -0.0039100 | -0.0101064 |
| 156 | 0.7968780 | 0.6238796 | -0.1386977 | 0.5614000 | -0.7912400 | 0.6070232 | -0.0039300 | -0.0102908 |
| 157 | 0.8006366 | 0.6287188 | -0.1387777 | 0.5605000 | -0.7913300 | 0.6066511 | -0.0039500 | -0.0104752 |
| 158 | 0.8043752 | 0.6335580 | -0.1388577 | 0.5596000 | -0.7914200 | 0.6062790 | -0.0039700 | -0.0106596 |
| 159 | 0.8080938 | 0.6383972 | -0.1389377 | 0.5587000 | -0.7915100 | 0.6059069 | -0.0039900 | -0.01      |





| Time discretization | Corresponding p-values for PRCC sensitivity indices |        |        |           |          |          |        |        |          |      |
|---------------------|-----------------------------------------------------|--------|--------|-----------|----------|----------|--------|--------|----------|------|
|                     | G                                                   |        | K      |           | P        |          | alpha  |        | beta     |      |
|                     | 0                                                   | 0.01   | 0.02   | 0.03      | 0.04     | 0.05     | 0.06   | 0.07   | 0.08     | 0.09 |
| 0.1                 | 1.9648                                              | 2.3218 | 1.8578 | 0.0003924 | 0.128804 | 0.330175 | 6.0248 | 4.0433 | 4.833179 |      |
| 0.2                 | 1.9085                                              | 2.4219 | 1.7180 | 0.001168  | 0.073378 | 0.2179   | 6.0248 | 4.0433 | 4.833179 |      |
| 0.3                 | 1.8795                                              | 2.5019 | 1.5879 | 0.002721  | 0.0485   | 0.146426 | 1.8564 | 3.0205 | 3.0205   |      |
| 0.4                 | 1.8642                                              | 2.5517 | 1.5077 | 0.004814  | 0.0309   | 0.1014   | 1.3064 | 2.1461 | 2.1461   |      |
| 0.5                 | 1.8548                                              | 2.5817 | 1.4676 | 0.007193  | 0.0208   | 0.073378 | 1.0146 | 1.6170 | 1.6170   |      |
| 0.6                 | 1.8500                                              | 2.6017 | 1.4376 | 0.010694  | 0.0151   | 0.054286 | 0.8146 | 1.3170 | 1.3170   |      |
| 0.7                 | 1.8485                                              | 2.6167 | 1.4176 | 0.014694  | 0.0111   | 0.040784 | 0.6846 | 1.1470 | 1.1470   |      |
| 0.8                 | 1.8480                                              | 2.6267 | 1.4076 | 0.019194  | 0.0081   | 0.031284 | 0.6046 | 1.0470 | 1.0470   |      |
| 0.9                 | 1.8480                                              | 2.6317 | 1.4076 | 0.024194  | 0.0051   | 0.023784 | 0.5546 | 0.9870 | 0.9870   |      |
| 1.0                 | 1.8480                                              | 2.6367 | 1.4076 | 0.029194  | 0.0031   | 0.018284 | 0.5146 | 0.9470 | 0.9470   |      |
| 1.1                 | 1.8480                                              | 2.6417 | 1.4076 | 0.034194  | 0.0021   | 0.014284 | 0.4846 | 0.9270 | 0.9270   |      |
| 1.2                 | 1.8480                                              | 2.6467 | 1.4076 | 0.039194  | 0.0016   | 0.011284 | 0.4646 | 0.9170 | 0.9170   |      |
| 1.3                 | 1.8480                                              | 2.6517 | 1.4076 | 0.044194  | 0.0012   | 0.009284 | 0.4546 | 0.9170 | 0.9170   |      |
| 1.4                 | 1.8480                                              | 2.6567 | 1.4076 | 0.049194  | 0.0009   | 0.007784 | 0.4546 | 0.9170 | 0.9170   |      |
| 1.5                 | 1.8480                                              | 2.6617 | 1.4076 | 0.054194  | 0.0007   | 0.007284 | 0.4546 | 0.9170 | 0.9170   |      |
| 1.6                 | 1.8480                                              | 2.6667 | 1.4076 | 0.059194  | 0.0006   | 0.006784 | 0.4546 | 0.9170 | 0.9170   |      |
| 1.7                 | 1.8480                                              | 2.6717 | 1.4076 | 0.064194  | 0.0005   | 0.006284 | 0.4546 | 0.9170 | 0.9170   |      |
| 1.8                 | 1.8480                                              | 2.6767 | 1.4076 | 0.069194  | 0.0004   | 0.005784 | 0.4546 | 0.9170 | 0.9170   |      |
| 1.9                 | 1.8480                                              | 2.6817 | 1.4076 | 0.074194  | 0.0004   | 0.005284 | 0.4546 | 0.9170 | 0.9170   |      |
| 2.0                 | 1.8480                                              | 2.6867 | 1.4076 | 0.079194  | 0.0003   | 0.004784 | 0.4546 | 0.9170 | 0.9170   |      |
| 2.1                 | 1.8480                                              | 2.6917 | 1.4076 | 0.084194  | 0.0003   | 0.004284 | 0.4546 | 0.9170 | 0.9170   |      |
| 2.2                 | 1.8480                                              | 2.6967 | 1.4076 | 0.089194  | 0.0003   | 0.003784 | 0.4546 | 0.9170 | 0.9170   |      |
| 2.3                 | 1.8480                                              | 2.7017 | 1.4076 | 0.094194  | 0.0003   | 0.003284 | 0.4546 | 0.9170 | 0.9170   |      |
| 2.4                 | 1.8480                                              | 2.7067 | 1.4076 | 0.099194  | 0.0003   | 0.002784 | 0.4546 | 0.9170 | 0.9170   |      |
| 2.5                 | 1.8480                                              | 2.7117 | 1.4076 | 0.104194  | 0.0003   | 0.002284 | 0.4546 | 0.9170 | 0.9170   |      |
| 2.6                 | 1.8480                                              | 2.7167 | 1.4076 | 0.109194  | 0.0003   | 0.001784 | 0.4546 | 0.9170 | 0.9170   |      |
| 2.7                 | 1.8480                                              | 2.7217 | 1.4076 | 0.114194  | 0.0003   | 0.001284 | 0.4546 | 0.9170 | 0.9170   |      |
| 2.8                 | 1.8480                                              | 2.7267 | 1.4076 | 0.119194  | 0.0003   | 0.000784 | 0.4546 | 0.9170 | 0.9170   |      |
| 2.9                 | 1.8480                                              | 2.7317 | 1.4076 | 0.124194  | 0.0003   | 0.000284 | 0.4546 | 0.9170 | 0.9170   |      |
| 3.0                 | 1.8480                                              | 2.7367 | 1.4076 | 0.129194  | 0.0003   | 0.000184 | 0.4546 | 0.9170 | 0.9170   |      |
| 3.1                 | 1.8480                                              | 2.7417 | 1.4076 | 0.134194  | 0.0003   | 0.000084 | 0.4546 | 0.9170 | 0.9170   |      |
| 3.2                 | 1.8480                                              | 2.7467 | 1.4076 | 0.139194  | 0.0003   | 0.000034 | 0.4546 | 0.9170 | 0.9170   |      |
| 3.3                 | 1.8480                                              | 2.7517 | 1.4076 | 0.144194  | 0.0003   | 0.000034 | 0.4546 | 0.9170 | 0.9170   |      |
| 3.4                 | 1.8480                                              | 2.7567 | 1.4076 | 0.149194  | 0.0003   | 0.000034 | 0.4546 | 0.9170 | 0.9170   |      |
| 3.5                 | 1.8480                                              | 2.7617 | 1.4076 | 0.154194  | 0.0003   | 0.000034 | 0.4546 | 0.9170 | 0.9170   |      |
| 3.6                 | 1.8480                                              | 2.7667 | 1.4076 | 0.159194  | 0.0003   | 0.000034 | 0.4546 | 0.9170 | 0.9170   |      |
| 3.7                 | 1.8480                                              | 2.7717 | 1.4076 | 0.164194  | 0.0003   | 0.000034 | 0.4546 | 0.9170 | 0.9170   |      |
| 3.8                 | 1.8480                                              | 2.7767 | 1.4076 | 0.169194  | 0.0003   | 0.000034 | 0.4546 | 0.9170 | 0.9170   |      |
| 3.9                 | 1.8480                                              | 2.7817 | 1.4076 | 0.174194  | 0.0003   | 0.000034 | 0.4546 | 0.9170 | 0.9170   |      |
| 4.0                 | 1.8480                                              | 2.7867 | 1.4076 | 0.179194  | 0.0003   | 0.000034 | 0.4546 | 0.9170 | 0.9170   |      |
| 4.1                 | 1.8480                                              | 2.7917 | 1.4076 | 0.184194  | 0.0003   | 0.000034 | 0.4546 | 0.9170 | 0.9170   |      |
| 4.2                 | 1.8480                                              | 2.7967 | 1.4076 | 0.189194  | 0.0003   | 0.000034 | 0.4546 | 0.9170 | 0.9170   |      |
| 4.3                 | 1.8480                                              | 2.8017 | 1.4076 | 0.194194  | 0.0003   | 0.000034 | 0.4546 | 0.9170 | 0.9170   |      |
| 4.4                 | 1.8480                                              | 2.8067 | 1.4076 | 0.199194  | 0.0003   | 0.000034 | 0.4546 | 0.9170 | 0.9170   |      |
| 4.5                 | 1.8480                                              | 2.8117 | 1.4076 | 0.204194  | 0.0003   | 0.000034 | 0.4546 | 0.9170 | 0.9170   |      |
| 4.6                 | 1.8480                                              | 2.8167 | 1.4076 | 0.209194  | 0.0003   | 0.000034 | 0.4546 | 0.9170 | 0.9170   |      |
| 4.7                 | 1.8480                                              | 2.8217 | 1.4076 | 0.214194  | 0.0003   | 0.000034 | 0.4546 | 0.9170 | 0.9170   |      |
| 4.8                 | 1.8480                                              | 2.8267 | 1.4076 | 0.219194  | 0.0003   | 0.000034 | 0.4546 | 0.9170 | 0.9170   |      |
| 4.9                 | 1.8480                                              | 2.8317 | 1.4076 | 0.224194  | 0.0003   | 0.000034 | 0.4546 | 0.9170 | 0.9170   |      |
| 5.0                 | 1.8480                                              | 2.8367 | 1.4076 | 0.229194  | 0.0003   | 0.000034 | 0.4546 | 0.9170 | 0.9170   |      |

| Time discretization | Corresponding p-values for PRCC sensitivity indices |        |        |          |        |          |        |        |        |      |
|---------------------|-----------------------------------------------------|--------|--------|----------|--------|----------|--------|--------|--------|------|
|                     | G                                                   |        | K      |          | P      |          | alpha  |        | beta   |      |
|                     | 0                                                   | 0.01   | 0.02   | 0.03     | 0.04   | 0.05     | 0.06   | 0.07   | 0.08   | 0.09 |
| 5.1                 | 1.8480                                              | 2.8417 | 1.4076 | 0.234194 | 0.0003 | 0.000034 | 0.4546 | 0.9170 | 0.9170 |      |
| 5.2                 | 1.8480                                              | 2.8467 | 1.4076 | 0.239194 | 0.0003 | 0.000034 | 0.4546 | 0.9170 | 0.9170 |      |
| 5.3                 | 1.8480                                              | 2.8517 | 1.4076 | 0.244194 | 0.0003 | 0.000034 | 0.4546 | 0.9170 | 0.9170 |      |
| 5.4                 | 1.8480                                              | 2.8567 | 1.4076 | 0.249194 | 0.0003 | 0.000034 | 0.4546 | 0.9170 | 0.9170 |      |
| 5.5                 | 1.8480                                              | 2.8617 | 1.4076 | 0.254194 | 0.0003 | 0.000034 | 0.4546 | 0.9170 | 0.9170 |      |
| 5.6                 | 1.8480                                              | 2.8667 | 1.4076 | 0.259194 | 0.0003 | 0.000034 | 0.4546 | 0.9170 | 0.9170 |      |
| 5.7                 | 1.8480                                              | 2.8717 | 1.4076 | 0.264194 | 0.0003 | 0.000034 | 0.4546 | 0.9170 | 0.9170 |      |
| 5.8                 | 1.8480                                              | 2.8767 | 1.4076 | 0.269194 | 0.0003 | 0.000034 | 0.4546 | 0.9170 | 0.9170 |      |
| 5.9                 | 1.8480                                              | 2.8817 | 1.4076 | 0.274194 | 0.0003 | 0.000034 | 0.4546 | 0.9170 | 0.9170 |      |
| 6.0                 | 1.8480                                              | 2.8867 | 1.4076 | 0.279194 | 0.0003 | 0.000034 | 0.4546 | 0.9170 | 0.9170 |      |
| 6.1                 | 1.8480                                              | 2.8917 | 1.4076 | 0.284194 | 0.0003 | 0.000034 | 0.4546 | 0.9170 | 0.9170 |      |
| 6.2                 | 1.8480                                              | 2.8967 | 1.4076 | 0.289194 | 0.0003 | 0.000034 | 0.4546 | 0.9170 | 0.9170 |      |
| 6.3                 | 1.8480                                              | 2.9017 | 1.4076 | 0.294194 | 0.0003 | 0.000034 | 0.4546 | 0.9170 | 0.9170 |      |
| 6.4                 | 1.8480                                              | 2.9067 | 1.4076 | 0.299194 | 0.0003 | 0.000034 | 0.4546 | 0.9170 | 0.9170 |      |
| 6.5                 | 1.8480                                              | 2.9117 | 1.4076 | 0.304194 | 0.0003 | 0.000034 | 0.4546 | 0.9170 | 0.9170 |      |
| 6.6                 | 1.8480                                              | 2.9167 | 1.4076 | 0.309194 | 0.0003 | 0.000034 | 0.4546 | 0.9170 | 0.9170 |      |
| 6.7                 | 1.8480                                              | 2.9217 | 1.4076 | 0.314194 | 0.0003 | 0.000034 | 0.4546 | 0.9170 | 0.9170 |      |
| 6.8                 | 1.8480                                              | 2.9267 | 1.4076 | 0.319194 | 0.0003 | 0.000034 | 0.4546 | 0.9170 | 0.9170 |      |
| 6.9                 | 1.8480                                              | 2.9317 | 1.4076 | 0.324194 | 0.0003 | 0.000034 | 0.4546 | 0.9170 | 0.9170 |      |
| 7.0                 | 1.8480                                              | 2.9367 | 1.4076 | 0.329194 | 0.0003 | 0.000034 | 0.4546 | 0.9170 | 0.9170 |      |
| 7.1                 | 1.8480                                              | 2.9417 | 1.4076 | 0.334194 | 0.0003 | 0.000034 | 0.4546 | 0.9170 | 0.9170 |      |
| 7.2                 | 1.8480                                              | 2.9467 | 1.4076 | 0.339194 | 0.0003 | 0.000034 | 0.4546 | 0.9170 | 0.9170 |      |
| 7.3                 | 1.8480                                              | 2.9517 | 1.4076 | 0.344194 | 0.0003 | 0.000034 | 0.4546 | 0.9170 | 0.9170 |      |
| 7.4                 | 1.8480                                              | 2.9567 | 1.4076 | 0.349194 | 0.0003 | 0.000034 | 0.4546 | 0.9170 | 0.9170 |      |
| 7.5                 | 1.8480                                              | 2.9617 | 1.4076 | 0.354194 | 0.0003 | 0.000034 | 0.4546 | 0.9170 | 0.9170 |      |
| 7.6                 | 1.8480                                              | 2.9667 | 1.4076 | 0.359194 | 0.0003 | 0.000034 | 0.4546 | 0.9170 | 0.9170 |      |
| 7.7                 | 1.8480                                              | 2.9717 | 1.4076 | 0.364194 | 0.0003 | 0.000034 | 0.4546 | 0.9170 | 0.9170 |      |
| 7.8                 | 1.8480                                              | 2.9767 | 1.4076 | 0.369194 | 0.0003 | 0.000034 | 0.4546 | 0.9170 | 0.9170 |      |
| 7.9                 | 1.8480                                              | 2.9817 | 1.4076 | 0.374194 | 0.0003 | 0.000034 | 0.4546 | 0.9170 | 0.9170 |      |
| 8.0                 | 1.8480                                              | 2.9867 | 1.4076 | 0.379194 | 0.0003 | 0.000034 | 0.4546 | 0.9170 | 0.9170 |      |
| 8.1                 | 1.8480                                              | 2.9917 | 1.4076 | 0.384194 | 0.0003 | 0.000034 | 0.4546 | 0.9170 | 0.9170 |      |
| 8.2                 | 1.8480                                              | 2.9967 | 1.4076 | 0.389194 | 0.0003 | 0.000034 | 0.4546 | 0.9170 | 0.9170 |      |
| 8.3                 | 1.8480                                              | 3.0017 | 1.4076 | 0.394194 | 0.0003 | 0.000034 | 0.4546 | 0.9170 | 0.9170 |      |
| 8.4                 | 1.8480                                              | 3.0067 | 1.4076 | 0.399194 | 0.0003 | 0.000034 | 0.4546 | 0.9170 | 0.9170 |      |
| 8.5                 | 1.8480                                              | 3.0117 | 1.4076 | 0.404194 | 0.0003 | 0.000034 | 0.4546 | 0.9170 | 0.9170 |      |
| 8.6                 | 1.8480                                              | 3.0167 | 1.4076 | 0.409194 | 0.0003 | 0.000034 | 0.4546 | 0.9170 | 0.9170 |      |
| 8.7                 | 1.8480                                              | 3.0217 | 1.4076 | 0.414194 | 0.0003 | 0.000034 | 0.4546 | 0.9170 | 0.9170 |      |
| 8.8                 | 1.8480                                              | 3.0267 | 1.4076 | 0.419194 | 0.0003 | 0.000034 | 0.4546 | 0.9170 | 0.9170 |      |
| 8.9                 | 1.8480                                              | 3.0317 | 1.4076 | 0.424194 | 0.0003 | 0.000034 | 0.4546 | 0.9170 | 0.9170 |      |
| 9.0                 | 1.8480                                              | 3.0367 | 1.4076 | 0.429194 | 0.0003 | 0.000034 | 0.4546 | 0.9170 | 0.9170 |      |
| 9.1                 | 1.8480                                              | 3.0417 | 1.4076 | 0.434194 | 0.0003 | 0.000034 | 0.4546 | 0.9170 | 0.9170 |      |
| 9.2                 | 1.8480                                              | 3.0467 | 1.4076 | 0.439194 | 0.0003 | 0.000034 | 0.4546 | 0.9170 | 0.9170 |      |
| 9.3                 | 1.8480                                              | 3.0517 | 1.4076 | 0.444194 | 0.0003 | 0.000034 | 0.4546 | 0.9170 | 0.9170 |      |
| 9.4                 | 1.8480                                              | 3.0567 | 1.4076 | 0.449194 | 0.0003 | 0.000034 | 0.4546 | 0.9170 | 0.9170 |      |
| 9.5                 | 1.8480                                              | 3.0617 | 1.4076 | 0.454194 | 0.0003 | 0.000034 | 0.4546 | 0.9170 | 0.9170 |      |
| 9.6                 | 1.8480                                              | 3.0667 | 1.4076 | 0.459194 | 0.0003 | 0.000034 | 0.4546 | 0.9170 | 0.9170 |      |
| 9.7                 | 1.8480                                              | 3.0717 | 1.4076 | 0.464194 | 0.0003 | 0.000034 | 0.4546 | 0.9170 | 0.9170 |      |
| 9.8                 | 1.8480                                              | 3.0767 | 1.4076 | 0.469194 | 0.0003 | 0.000034 | 0.4546 | 0.9170 | 0.9170 |      |
| 9.9                 | 1.8480                                              | 3.0817 | 1.4076 | 0.474194 | 0.0003 | 0.000034 | 0.4546 | 0.9170 | 0.9170 |      |























|    |           |          |       |     |       |      |         |          |      |           |           |       |     |      |       |     |           |           |      |           |           |       |      |     |       |     |          |           |      |           |           |       |    |           |       |           |           |      |           |          |       |     |       |      |       |           |           |      |           |          |       |     |       |      |       |           |           |      |           |          |       |     |       |      |       |           |           |      |           |          |       |     |       |      |       |           |           |      |           |          |       |     |       |      |       |           |           |      |           |          |       |     |       |      |       |           |           |      |           |          |       |     |       |      |       |           |           |      |           |          |       |     |       |      |       |           |           |      |           |          |       |     |       |      |       |           |           |      |           |          |       |     |       |      |       |           |           |      |           |          |       |     |       |      |       |           |           |      |           |          |       |     |       |      |       |           |           |      |           |          |       |     |       |      |       |           |           |      |           |          |       |     |       |      |       |           |           |      |           |          |       |     |       |      |       |           |           |      |           |          |       |     |       |      |       |           |           |      |           |          |       |     |       |      |       |           |           |      |           |          |       |     |       |      |       |           |           |      |           |          |       |     |       |      |       |           |           |      |           |          |       |     |       |      |       |           |           |      |           |          |       |     |       |      |       |           |           |      |           |          |       |     |       |      |       |           |           |      |           |          |       |     |       |      |       |           |           |      |           |          |       |     |       |      |       |           |           |      |           |          |       |     |       |      |       |           |           |      |           |          |       |     |       |      |       |           |           |      |           |          |       |     |       |      |       |           |           |      |           |          |       |     |       |      |       |           |           |      |           |          |       |     |       |      |       |           |           |      |           |          |       |     |       |      |       |           |           |      |           |          |       |     |       |      |       |           |           |
|----|-----------|----------|-------|-----|-------|------|---------|----------|------|-----------|-----------|-------|-----|------|-------|-----|-----------|-----------|------|-----------|-----------|-------|------|-----|-------|-----|----------|-----------|------|-----------|-----------|-------|----|-----------|-------|-----------|-----------|------|-----------|----------|-------|-----|-------|------|-------|-----------|-----------|------|-----------|----------|-------|-----|-------|------|-------|-----------|-----------|------|-----------|----------|-------|-----|-------|------|-------|-----------|-----------|------|-----------|----------|-------|-----|-------|------|-------|-----------|-----------|------|-----------|----------|-------|-----|-------|------|-------|-----------|-----------|------|-----------|----------|-------|-----|-------|------|-------|-----------|-----------|------|-----------|----------|-------|-----|-------|------|-------|-----------|-----------|------|-----------|----------|-------|-----|-------|------|-------|-----------|-----------|------|-----------|----------|-------|-----|-------|------|-------|-----------|-----------|------|-----------|----------|-------|-----|-------|------|-------|-----------|-----------|------|-----------|----------|-------|-----|-------|------|-------|-----------|-----------|------|-----------|----------|-------|-----|-------|------|-------|-----------|-----------|------|-----------|----------|-------|-----|-------|------|-------|-----------|-----------|------|-----------|----------|-------|-----|-------|------|-------|-----------|-----------|------|-----------|----------|-------|-----|-------|------|-------|-----------|-----------|------|-----------|----------|-------|-----|-------|------|-------|-----------|-----------|------|-----------|----------|-------|-----|-------|------|-------|-----------|-----------|------|-----------|----------|-------|-----|-------|------|-------|-----------|-----------|------|-----------|----------|-------|-----|-------|------|-------|-----------|-----------|------|-----------|----------|-------|-----|-------|------|-------|-----------|-----------|------|-----------|----------|-------|-----|-------|------|-------|-----------|-----------|------|-----------|----------|-------|-----|-------|------|-------|-----------|-----------|------|-----------|----------|-------|-----|-------|------|-------|-----------|-----------|------|-----------|----------|-------|-----|-------|------|-------|-----------|-----------|------|-----------|----------|-------|-----|-------|------|-------|-----------|-----------|------|-----------|----------|-------|-----|-------|------|-------|-----------|-----------|------|-----------|----------|-------|-----|-------|------|-------|-----------|-----------|------|-----------|----------|-------|-----|-------|------|-------|-----------|-----------|------|-----------|----------|-------|-----|-------|------|-------|-----------|-----------|------|-----------|----------|-------|-----|-------|------|-------|-----------|-----------|------|-----------|----------|-------|-----|-------|------|-------|-----------|-----------|
| 11 | 0.0214889 | 0.782739 | 5.976 | 7.0 | 1.021 | 1.35 | 0.90371 | 0.588196 | 26.9 | 0.4180183 | 0.7429287 | 1.016 | 5.9 | 1.46 | 2.318 | 0.8 | 0.7693967 | 0.8429191 | 41.0 | 0.1621546 | 0.1706556 | 1.906 | 4.08 | 6.0 | 6.276 | 7.6 | 0.740277 | 0.8530139 | 56.9 | 0.0008415 | 0.0023745 | 9.971 | 26 | 0.0027643 | 1.216 | 0.4941528 | 0.4888881 | 57.0 | 0.0208342 | 0.027769 | 7.811 | 7.0 | 1.146 | 1.33 | 0.925 | 0.9042055 | 0.4809728 | 57.1 | 0.0208342 | 0.027769 | 7.811 | 7.0 | 1.146 | 1.33 | 0.925 | 0.9042055 | 0.4809728 | 57.2 | 0.0208342 | 0.027769 | 7.811 | 7.0 | 1.146 | 1.33 | 0.925 | 0.9042055 | 0.4809728 | 57.3 | 0.0208342 | 0.027769 | 7.811 | 7.0 | 1.146 | 1.33 | 0.925 | 0.9042055 | 0.4809728 | 57.4 | 0.0208342 | 0.027769 | 7.811 | 7.0 | 1.146 | 1.33 | 0.925 | 0.9042055 | 0.4809728 | 57.5 | 0.0208342 | 0.027769 | 7.811 | 7.0 | 1.146 | 1.33 | 0.925 | 0.9042055 | 0.4809728 | 57.6 | 0.0208342 | 0.027769 | 7.811 | 7.0 | 1.146 | 1.33 | 0.925 | 0.9042055 | 0.4809728 | 57.7 | 0.0208342 | 0.027769 | 7.811 | 7.0 | 1.146 | 1.33 | 0.925 | 0.9042055 | 0.4809728 | 57.8 | 0.0208342 | 0.027769 | 7.811 | 7.0 | 1.146 | 1.33 | 0.925 | 0.9042055 | 0.4809728 | 57.9 | 0.0208342 | 0.027769 | 7.811 | 7.0 | 1.146 | 1.33 | 0.925 | 0.9042055 | 0.4809728 | 58.0 | 0.0208342 | 0.027769 | 7.811 | 7.0 | 1.146 | 1.33 | 0.925 | 0.9042055 | 0.4809728 | 58.1 | 0.0208342 | 0.027769 | 7.811 | 7.0 | 1.146 | 1.33 | 0.925 | 0.9042055 | 0.4809728 | 58.2 | 0.0208342 | 0.027769 | 7.811 | 7.0 | 1.146 | 1.33 | 0.925 | 0.9042055 | 0.4809728 | 58.3 | 0.0208342 | 0.027769 | 7.811 | 7.0 | 1.146 | 1.33 | 0.925 | 0.9042055 | 0.4809728 | 58.4 | 0.0208342 | 0.027769 | 7.811 | 7.0 | 1.146 | 1.33 | 0.925 | 0.9042055 | 0.4809728 | 58.5 | 0.0208342 | 0.027769 | 7.811 | 7.0 | 1.146 | 1.33 | 0.925 | 0.9042055 | 0.4809728 | 58.6 | 0.0208342 | 0.027769 | 7.811 | 7.0 | 1.146 | 1.33 | 0.925 | 0.9042055 | 0.4809728 | 58.7 | 0.0208342 | 0.027769 | 7.811 | 7.0 | 1.146 | 1.33 | 0.925 | 0.9042055 | 0.4809728 | 58.8 | 0.0208342 | 0.027769 | 7.811 | 7.0 | 1.146 | 1.33 | 0.925 | 0.9042055 | 0.4809728 | 58.9 | 0.0208342 | 0.027769 | 7.811 | 7.0 | 1.146 | 1.33 | 0.925 | 0.9042055 | 0.4809728 | 59.0 | 0.0208342 | 0.027769 | 7.811 | 7.0 | 1.146 | 1.33 | 0.925 | 0.9042055 | 0.4809728 | 59.1 | 0.0208342 | 0.027769 | 7.811 | 7.0 | 1.146 | 1.33 | 0.925 | 0.9042055 | 0.4809728 | 59.2 | 0.0208342 | 0.027769 | 7.811 | 7.0 | 1.146 | 1.33 | 0.925 | 0.9042055 | 0.4809728 | 59.3 | 0.0208342 | 0.027769 | 7.811 | 7.0 | 1.146 | 1.33 | 0.925 | 0.9042055 | 0.4809728 | 59.4 | 0.0208342 | 0.027769 | 7.811 | 7.0 | 1.146 | 1.33 | 0.925 | 0.9042055 | 0.4809728 | 59.5 | 0.0208342 | 0.027769 | 7.811 | 7.0 | 1.146 | 1.33 | 0.925 | 0.9042055 | 0.4809728 | 59.6 | 0.0208342 | 0.027769 | 7.811 | 7.0 | 1.146 | 1.33 | 0.925 | 0.9042055 | 0.4809728 | 59.7 | 0.0208342 | 0.027769 | 7.811 | 7.0 | 1.146 | 1.33 | 0.925 | 0.9042055 | 0.4809728 | 59.8 | 0.0208342 | 0.027769 | 7.811 | 7.0 | 1.146 | 1.33 | 0.925 | 0.9042055 | 0.4809728 | 59.9 | 0.0208342 | 0.027769 | 7.811 | 7.0 | 1.146 | 1.33 | 0.925 | 0.9042055 | 0.4809728 | 60.0 | 0.0208342 | 0.027769 | 7.811 | 7.0 | 1.146 | 1.33 | 0.925 | 0.9042055 | 0.4809728 |
|----|-----------|----------|-------|-----|-------|------|---------|----------|------|-----------|-----------|-------|-----|------|-------|-----|-----------|-----------|------|-----------|-----------|-------|------|-----|-------|-----|----------|-----------|------|-----------|-----------|-------|----|-----------|-------|-----------|-----------|------|-----------|----------|-------|-----|-------|------|-------|-----------|-----------|------|-----------|----------|-------|-----|-------|------|-------|-----------|-----------|------|-----------|----------|-------|-----|-------|------|-------|-----------|-----------|------|-----------|----------|-------|-----|-------|------|-------|-----------|-----------|------|-----------|----------|-------|-----|-------|------|-------|-----------|-----------|------|-----------|----------|-------|-----|-------|------|-------|-----------|-----------|------|-----------|----------|-------|-----|-------|------|-------|-----------|-----------|------|-----------|----------|-------|-----|-------|------|-------|-----------|-----------|------|-----------|----------|-------|-----|-------|------|-------|-----------|-----------|------|-----------|----------|-------|-----|-------|------|-------|-----------|-----------|------|-----------|----------|-------|-----|-------|------|-------|-----------|-----------|------|-----------|----------|-------|-----|-------|------|-------|-----------|-----------|------|-----------|----------|-------|-----|-------|------|-------|-----------|-----------|------|-----------|----------|-------|-----|-------|------|-------|-----------|-----------|------|-----------|----------|-------|-----|-------|------|-------|-----------|-----------|------|-----------|----------|-------|-----|-------|------|-------|-----------|-----------|------|-----------|----------|-------|-----|-------|------|-------|-----------|-----------|------|-----------|----------|-------|-----|-------|------|-------|-----------|-----------|------|-----------|----------|-------|-----|-------|------|-------|-----------|-----------|------|-----------|----------|-------|-----|-------|------|-------|-----------|-----------|------|-----------|----------|-------|-----|-------|------|-------|-----------|-----------|------|-----------|----------|-------|-----|-------|------|-------|-----------|-----------|------|-----------|----------|-------|-----|-------|------|-------|-----------|-----------|------|-----------|----------|-------|-----|-------|------|-------|-----------|-----------|------|-----------|----------|-------|-----|-------|------|-------|-----------|-----------|------|-----------|----------|-------|-----|-------|------|-------|-----------|-----------|------|-----------|----------|-------|-----|-------|------|-------|-----------|-----------|------|-----------|----------|-------|-----|-------|------|-------|-----------|-----------|------|-----------|----------|-------|-----|-------|------|-------|-----------|-----------|------|-----------|----------|-------|-----|-------|------|-------|-----------|-----------|------|-----------|----------|-------|-----|-------|------|-------|-----------|-----------|











|    |           |           |           |           |           |           |           |    |           |           |           |           |           |           |          |     |           |           |           |           |           |           |          |     |           |           |           |          |           |          |           |
|----|-----------|-----------|-----------|-----------|-----------|-----------|-----------|----|-----------|-----------|-----------|-----------|-----------|-----------|----------|-----|-----------|-----------|-----------|-----------|-----------|-----------|----------|-----|-----------|-----------|-----------|----------|-----------|----------|-----------|
| 60 | 0.4352913 | -0.766693 | -0.498878 | 0.732107  | 0.487266  | 0.18288   | 0.016177  | 84 | 0.389075  | -0.629177 | -0.527023 | 0.332468  | 0.385788  | 0.1680906 | 0.023292 | 99  | 0.303022  | -0.587736 | -0.547078 | 0.236922  | 0.350843  | 0.166977  | 0.024222 | 114 | 0.4043129 | -0.781054 | -0.553579 | 0.218057 | 0.3508725 | 0.165727 | -0.059204 |
| 61 | 0.4387213 | -0.766603 | -0.498878 | 0.732107  | 0.487266  | 0.18288   | 0.016177  | 85 | 0.3897448 | -0.628971 | -0.527024 | 0.332469  | 0.385789  | 0.1680907 | 0.023293 | 100 | 0.303701  | -0.587484 | -0.547079 | 0.236923  | 0.350844  | 0.166978  | 0.024223 | 115 | 0.4043129 | -0.781054 | -0.553579 | 0.218057 | 0.3508725 | 0.165727 | -0.059204 |
| 62 | 0.4376741 | -0.757592 | -0.499182 | 0.7459162 | 0.478008  | 0.184395  | 0.016064  | 86 | 0.3880127 | -0.628818 | -0.527024 | 0.332471  | 0.3849169 | 0.1685299 | 0.023714 | 99  | 0.3480638 | -0.583899 | -0.547245 | 0.237629  | 0.350032  | 0.1670283 | 0.024364 | 112 | 0.4043129 | -0.781054 | -0.553579 | 0.218057 | 0.3508725 | 0.165727 | -0.059204 |
| 63 | 0.4372828 | -0.762792 | -0.499182 | 0.7459162 | 0.478008  | 0.184395  | 0.016064  | 87 | 0.3884139 | -0.628241 | -0.527024 | 0.332472  | 0.3849172 | 0.1684247 | 0.023161 | 99  | 0.3492937 | -0.583939 | -0.547489 | 0.2362616 | 0.350477  | 0.1669504 | 0.024374 | 113 | 0.4043129 | -0.781054 | -0.553579 | 0.218057 | 0.3508725 | 0.165727 | -0.059204 |
| 64 | 0.4354821 | -0.749507 | -0.500273 | 0.7373004 | 0.480769  | 0.1836365 | 0.0158629 | 88 | 0.3880137 | -0.628155 | -0.525583 | 0.3324631 | 0.3846394 | 0.1680828 | 0.023204 | 99  | 0.3490217 | -0.583899 | -0.547489 | 0.2362616 | 0.350477  | 0.1669504 | 0.024374 | 114 | 0.4043129 | -0.781054 | -0.553579 | 0.218057 | 0.3508725 | 0.165727 | -0.059204 |
| 65 | 0.435389  | -0.742581 | -0.499444 | 0.7469042 | 0.476902  | 0.1837429 | 0.0162249 | 88 | 0.3881137 | -0.627738 | -0.524709 | 0.3324581 | 0.3846029 | 0.1683145 | 0.023042 | 99  | 0.3492937 | -0.583899 | -0.547489 | 0.2362616 | 0.350477  | 0.1669504 | 0.024374 | 115 | 0.4043129 | -0.781054 | -0.553579 | 0.218057 | 0.3508725 | 0.165727 | -0.059204 |
| 66 | 0.4352279 | -0.740297 | -0.500174 | 0.7370103 | 0.4769775 | 0.183445  | 0.0162634 | 89 | 0.3879502 | -0.627704 | -0.525235 | 0.3324627 | 0.3846054 | 0.1680405 | 0.023026 | 99  | 0.3489822 | -0.583899 | -0.547071 | 0.2329526 | 0.350708  | 0.1669282 | 0.024379 | 116 | 0.4043129 | -0.781054 | -0.553579 | 0.218057 | 0.3508725 | 0.165727 | -0.059204 |
| 67 | 0.4354461 | -0.749507 | -0.500174 | 0.7370103 | 0.4769775 | 0.183445  | 0.0162634 | 89 | 0.3880137 | -0.627704 | -0.525526 | 0.3324631 | 0.3846054 | 0.1680405 | 0.023027 | 99  | 0.3490217 | -0.583899 | -0.547478 | 0.2329526 | 0.350708  | 0.1669282 | 0.024379 | 117 | 0.4043129 | -0.781054 | -0.553579 | 0.218057 | 0.3508725 | 0.165727 | -0.059204 |
| 68 | 0.4353724 | -0.743498 | -0.500068 | 0.7374623 | 0.4754436 | 0.1831501 | 0.0162321 | 89 | 0.3880137 | -0.627678 | -0.525443 | 0.3324628 | 0.3837574 | 0.1681466 | 0.023054 | 99  | 0.3489822 | -0.583899 | -0.547618 | 0.227473  | 0.3517071 | 0.1669658 | 0.024202 | 118 | 0.4043129 | -0.781054 | -0.553579 | 0.218057 | 0.3508725 | 0.165727 | -0.059204 |
| 69 | 0.4353974 | -0.747293 | -0.500174 | 0.7374623 | 0.4754436 | 0.1831501 | 0.0162321 | 89 | 0.3880137 | -0.627678 | -0.525443 | 0.3324628 | 0.3837574 | 0.1681466 | 0.023054 | 99  | 0.3489822 | -0.583899 | -0.547618 | 0.227473  | 0.3517071 | 0.1669658 | 0.024202 | 119 | 0.4043129 | -0.781054 | -0.553579 | 0.218057 | 0.3508725 | 0.165727 | -0.059204 |
| 70 | 0.4326978 | -0.723638 | -0.500068 | 0.7374623 | 0.4754436 | 0.1831501 | 0.0162321 | 89 | 0.3879502 | -0.627646 | -0.525885 | 0.3324631 | 0.3829858 | 0.1680041 | 0.023159 | 100 | 0.3480301 | -0.583899 | -0.547032 | 0.232762  | 0.3507043 | 0.1661322 | 0.024634 | 114 | 0.4043129 | -0.781054 | -0.553579 | 0.218057 | 0.3508725 | 0.165727 | -0.059204 |
| 71 | 0.4325243 | -0.718118 | -0.501228 | 0.7305789 | 0.4744364 | 0.1824589 | 0.0159787 | 89 | 0.3864408 | -0.626447 | -0.524879 | 0.332381  | 0.3823897 | 0.1674769 | 0.023326 | 100 | 0.3480301 | -0.583899 | -0.548012 | 0.222768  | 0.3504749 | 0.1663024 | 0.024373 | 115 | 0.4043129 | -0.781054 | -0.553579 | 0.218057 | 0.3508725 | 0.165727 | -0.059204 |
| 72 | 0.4314675 | -0.709181 | -0.501228 | 0.7305789 | 0.4744364 | 0.1824589 | 0.0159787 | 89 | 0.3861263 | -0.626143 | -0.525089 | 0.332381  | 0.3815545 | 0.1672005 | 0.023396 | 100 | 0.3480301 | -0.583899 | -0.548119 | 0.221924  | 0.3504689 | 0.1662941 | 0.024368 | 116 | 0.4043129 | -0.781054 | -0.553579 | 0.218057 | 0.3508725 | 0.165727 | -0.059204 |
| 73 | 0.4302478 | -0.703183 | -0.502172 | 0.728011  | 0.4724669 | 0.1821318 | 0.0159803 | 89 | 0.3853844 | -0.625389 | -0.526587 | 0.3323789 | 0.381023  | 0.1677833 | 0.023007 | 100 | 0.3480301 | -0.583899 | -0.548119 | 0.221924  | 0.3504689 | 0.1662941 | 0.024368 | 117 | 0.4043129 | -0.781054 | -0.553579 | 0.218057 | 0.3508725 | 0.165727 | -0.059204 |
| 74 | 0.4290889 | -0.696182 | -0.502172 | 0.728011  | 0.4724669 | 0.1821318 | 0.0159803 | 89 | 0.3847476 | -0.624787 | -0.526425 | 0.3323768 | 0.3805111 | 0.1683793 | 0.023024 | 100 | 0.3481678 | -0.583899 | -0.548119 | 0.221924  | 0.3504689 | 0.1662941 | 0.024368 | 118 | 0.4043129 | -0.781054 | -0.553579 | 0.218057 | 0.3508725 | 0.165727 | -0.059204 |
| 75 | 0.4280229 | -0.691182 | -0.503042 | 0.7273631 | 0.4725861 | 0.181662  | 0.0159913 | 89 | 0.3840476 | -0.624704 | -0.526478 | 0.3323789 | 0.3807636 | 0.1686838 | 0.023475 | 100 | 0.3480301 | -0.583899 | -0.548119 | 0.221924  | 0.3504689 | 0.1662941 | 0.024368 | 119 | 0.4043129 | -0.781054 | -0.553579 | 0.218057 | 0.3508725 | 0.165727 | -0.059204 |
| 76 | 0.4270229 | -0.691182 | -0.503042 | 0.7273631 | 0.4725861 | 0.181662  | 0.0159913 | 89 | 0.3840476 | -0.624704 | -0.526478 | 0.3323789 | 0.3807636 | 0.1686838 | 0.023475 | 100 | 0.3480301 | -0.583899 | -0.548119 | 0.221924  | 0.3504689 | 0.1662941 | 0.024368 | 120 | 0.4043129 | -0.781054 | -0.553579 | 0.218057 | 0.3508725 | 0.165727 | -0.059204 |
| 77 | 0.4260229 | -0.691182 | -0.503042 | 0.7273631 | 0.4725861 | 0.181662  | 0.0159913 | 89 | 0.3840476 | -0.624704 | -0.526478 | 0.3323789 | 0.3807636 | 0.1686838 | 0.023475 | 100 | 0.3480301 | -0.583899 | -0.548119 | 0.221924  | 0.3504689 | 0.1662941 | 0.024368 | 121 | 0.4043129 | -0.781054 | -0.553579 | 0.218057 | 0.3508725 | 0.165727 | -0.059204 |
| 78 | 0.4250229 | -0.691182 | -0.503042 | 0.7273631 | 0.4725861 | 0.181662  | 0.0159913 | 89 | 0.3840476 | -0.624704 | -0.526478 | 0.3323789 | 0.3807636 | 0.1686838 | 0.023475 | 100 | 0.3480301 | -0.583899 | -0.548119 | 0.221924  | 0.3504689 | 0.1662941 | 0.024368 | 122 | 0.4043129 | -0.781054 | -0.553579 | 0.218057 | 0.3508725 | 0.165727 | -0.059204 |
| 79 | 0.4240229 | -0.691182 | -0.503042 | 0.7273631 | 0.4725861 | 0.181662  | 0.0159913 | 89 | 0.3840476 | -0.624704 | -0.526478 | 0.3323789 | 0.3807636 | 0.1686838 | 0.023475 | 100 | 0.3480301 | -0.583899 | -0.548119 | 0.221924  | 0.3504689 | 0.1662941 | 0.024368 | 123 | 0.4043129 | -0.781054 | -0.553579 | 0.218057 | 0.3508725 | 0.165727 | -0.059204 |
| 80 | 0.4230229 | -0.691182 | -0.503042 | 0.7273631 | 0.4725861 | 0.181662  | 0.0159913 | 89 | 0.3840476 | -0.624704 | -0.526478 | 0.3323789 | 0.3807636 | 0.1686838 | 0.023475 | 100 | 0.3480301 | -0.583899 | -0.548119 | 0.221924  | 0.3504689 | 0.1662941 | 0.024368 | 124 | 0.4043129 | -0.781054 | -0.553579 | 0.218057 | 0.3508725 | 0.165727 | -0.059204 |
| 81 | 0.4220229 | -0.691182 | -0.503042 | 0.7273631 | 0.4725861 | 0.181662  | 0.0159913 | 89 | 0.3840476 | -0.624704 | -0.526478 | 0.3323789 | 0.3807636 | 0.1686838 | 0.023475 | 100 | 0.3480301 | -0.583899 | -0.548119 | 0.221924  | 0.3504689 | 0.1662941 | 0.024368 | 125 | 0.4043129 | -0.781054 | -0.553579 | 0.218057 | 0.3508725 | 0.165727 | -0.059204 |
| 82 | 0.4210229 | -0.691182 | -0.503042 | 0.7273631 | 0.4725861 | 0.181662  | 0.0159913 | 89 | 0.3840476 | -0.624704 | -0.526478 | 0.3323789 | 0.3807636 | 0.1686838 | 0.023475 | 100 | 0.3480301 | -0.583899 | -0.548119 | 0.221924  | 0.3504689 | 0.1662941 | 0.024368 | 126 | 0.4043129 | -0.781054 | -0.553579 | 0.218057 | 0.3508725 | 0.165727 | -0.059204 |
| 83 | 0.4200229 | -0.691182 | -0.503042 | 0.7273631 | 0.4725861 | 0.181662  | 0.0159913 | 89 | 0.3840476 | -0.624704 | -0.526478 | 0.3323789 | 0.3807636 | 0.1686838 | 0.023475 | 100 | 0.3480301 | -0.583899 | -0.548119 | 0.221924  | 0.3504689 | 0.1662941 | 0.024368 | 127 | 0.4043129 | -0.781054 | -0.553579 | 0.218057 | 0.3508725 | 0.165727 | -0.059204 |
| 84 | 0.4190229 | -0.691182 | -0.503042 | 0.7273631 | 0.4725861 | 0.181662  | 0.0159913 | 89 | 0.3840476 | -0.624704 | -0.526478 | 0.3323789 | 0.3807636 | 0.1686838 | 0.023475 | 100 | 0.3480301 | -0.583899 | -0.548119 | 0.221924  | 0.3504689 | 0.1662941 | 0.024368 | 128 | 0.4043129 | -0.781054 | -0.553579 | 0.218057 | 0.3508725 | 0.165727 | -0.059204 |
| 85 | 0.4180229 | -0.691182 | -0.503042 | 0.7273631 | 0.4725861 | 0.181662  | 0.0159913 | 89 | 0.3840476 | -0.624704 | -0.526478 | 0.3323789 | 0.3807636 | 0.1686838 | 0.023475 | 100 | 0.3480301 | -0.583899 | -0.548119 | 0.221924  | 0.3504689 | 0.1662941 | 0.024368 | 129 | 0.4043129 | -0.781054 | -0.553579 | 0.218057 | 0.3508725 | 0.165727 | -0.059204 |
| 86 | 0.4170229 | -0.691182 | -0.503042 | 0.7273631 | 0.4725861 | 0.181662  | 0.0159913 | 89 | 0.3840476 | -0.624704 | -0.526478 | 0.3323789 | 0.3807636 | 0.1686838 | 0.023475 | 100 | 0.3480301 | -0.583899 | -0.548119 | 0.221924  | 0.3504689 | 0.1662941 | 0.024368 | 130 | 0.4043129 | -0.781054 | -0.553579 | 0.218057 | 0.3508725 | 0.165727 | -0.059204 |
| 87 | 0.4160229 | -0.691182 | -0.503042 | 0.7273631 | 0.4725861 | 0.181662  | 0.0159913 | 89 | 0.3840476 | -0.624704 | -0.526478 | 0.3323789 | 0.3807636 | 0.1686838 | 0.023475 | 100 | 0.3480301 | -0.583899 | -0.548119 | 0.221924  | 0.3504689 | 0.1662941 | 0.024368 | 131 | 0.4043129 | -0.781054 | -0.553579 | 0.218057 | 0.3508725 | 0.165727 | -0.059204 |
| 88 | 0.4150229 | -0.691182 | -0.503042 | 0.7273631 | 0.4725861 | 0.181662  | 0.0159913 | 89 | 0.3840476 | -0.624704 | -0.526478 | 0.3323789 | 0.3807636 | 0.1686838 | 0.023475 | 100 | 0.3480301 | -0.583899 | -0.548119 | 0.221924  | 0.3504689 | 0.1662941 | 0.024368 | 132 | 0.4043129 | -0.781054 | -0.553579 | 0.218057 | 0.3508725 | 0.165727 | -0.059204 |
| 89 | 0.4140229 | -0.691182 | -0.503042 | 0.7273631 | 0.4725861 | 0.181662  | 0.0159913 | 89 | 0.3840476 | -0.624704 | -0.526478 | 0.3323789 | 0.3807636 | 0.1686838 | 0.023475 | 100 | 0.3480301 | -0.583899 | -0.548119 | 0.221924  | 0.3504689 | 0.1662941 | 0.024368 | 133 | 0.4043129 | -0.781054 | -0.553579 | 0.218057 | 0.3508725 | 0.165727 | -0.059204 |
| 90 | 0.4130229 |           |           |           |           |           |           |    |           |           |           |           |           |           |          |     |           |           |           |           |           |           |          |     |           |           |           |          |           |          |           |



























Time

Table with columns: Time, ID, K, GSD, V, P, W, P, K, P, G, E, G, S, D, S, P, W, D. Contains multiple rows of data.

Time

Table with columns: Time, ID, K, GSD, V, P, W, P, K, P, G, E, G, S, D, S, P, W, D. Contains multiple rows of data.

Time

Table with columns: Time, ID, K, GSD, V, P, W, P, K, P, G, E, G, S, D, S, P, W, D. Contains multiple rows of data.

Corresponding p-values for PRCC sensitivity indices

Time

Table with columns: Time, ID, K, GSD, V, P, W, P, K, P, G, E, G, S, D, S, P, W, D. Contains multiple rows of data.

Time

Table with columns: Time, ID, K, GSD, V, P, W, P, K, P, G, E, G, S, D, S, P, W, D. Contains multiple rows of data.







Table S7: PRCC analysis data for [LACT] with [G](0)=0.02 mM: PRCC sensitivity indices and their corresponding p-values

Sensitivity analysis data from PRCC for [LACT] with [G](0)=0.02 mM (only the parameters to which [LACT]'s level is sensitive to appear)

| Time discretization |            |           | Time discretization |            |            | Time discretization |            |            | Time discretization |            |            |
|---------------------|------------|-----------|---------------------|------------|------------|---------------------|------------|------------|---------------------|------------|------------|
| alpha               | [LACT]_0   |           | alpha               | [LACT]_0   |            | alpha               | [LACT]_0   |            | alpha               | [LACT]_0   |            |
| 0                   | 0          | 1         | 15                  | 0.01577905 | 0.9999955  | 30                  | -0.1309393 | 0.9991982  | 45                  | -0.2220871 | 0.99169523 |
| 0.1                 | 0          | 1         | 15.1                | 0.01577905 | 0.9999955  | 30.1                | -0.1309393 | 0.9991982  | 45.1                | -0.221327  | 0.99165686 |
| 0.2                 | 0          | 1         | 15.2                | 0.01577905 | 0.9999955  | 30.2                | -0.1309393 | 0.9991982  | 45.2                | -0.2217972 | 0.99161873 |
| 0.3                 | 0          | 1         | 15.3                | 0.01577905 | 0.9999955  | 30.3                | -0.1318738 | 0.9991929  | 45.3                | -0.2235541 | 0.99162683 |
| 0.4                 | 0          | 1         | 15.4                | 0.01577905 | 0.9999955  | 30.4                | -0.1320204 | 0.99915144 | 45.4                | -0.2235541 | 0.99162683 |
| 0.5                 | 0.0396159  | 0.9999855 | 15.5                | 0.01577905 | 0.9999955  | 30.5                | -0.140396  | 0.99909172 | 45.5                | -0.2242382 | 0.99150805 |
| 0.6                 | 0.0396159  | 0.9999855 | 15.6                | 0.01577905 | 0.9999955  | 30.6                | -0.1474338 | 0.99907503 | 45.6                | -0.2260782 | 0.99159688 |
| 0.7                 | 0.0396159  | 0.9999855 | 15.7                | 0.01577905 | 0.9999955  | 30.7                | -0.1474338 | 0.99907503 | 45.7                | -0.2274464 | 0.99146095 |
| 0.8                 | 0.0396159  | 0.9999855 | 15.8                | 0.01577905 | 0.9999955  | 30.8                | -0.1474338 | 0.99907503 | 45.8                | -0.228651  | 0.9913472  |
| 0.9                 | 0.0396159  | 0.9999855 | 15.9                | 0.01577905 | 0.9999955  | 30.9                | -0.1508444 | 0.9990572  | 45.9                | -0.2294326 | 0.99115579 |
| 1.0                 | 0.0396159  | 0.9999855 | 16.0                | 0.01577905 | 0.9999955  | 31.0                | -0.1481927 | 0.99909073 | 46.0                | -0.2323476 | 0.99102151 |
| 1.1                 | 0.0396159  | 0.9999855 | 16.1                | 0.01577905 | 0.9999955  | 31.1                | -0.1469856 | 0.99894217 | 46.1                | -0.2323476 | 0.99102151 |
| 1.2                 | 0.0396159  | 0.9999855 | 16.2                | 0.01577905 | 0.9999955  | 31.2                | -0.148972  | 0.99894003 | 46.2                | -0.2321103 | 0.99109799 |
| 1.3                 | 0.0396159  | 0.9999855 | 16.3                | 0.01577905 | 0.9999955  | 31.3                | -0.1519855 | 0.99892332 | 46.3                | -0.2308816 | 0.99098242 |
| 1.4                 | 0.0396159  | 0.9999855 | 16.4                | 0.01577905 | 0.9999955  | 31.4                | -0.1519855 | 0.99892332 | 46.4                | -0.2315202 | 0.99087486 |
| 1.5                 | 0.0396159  | 0.9999855 | 16.5                | 0.01577905 | 0.9999955  | 31.5                | -0.1544147 | 0.99885093 | 46.5                | -0.232896  | 0.99082574 |
| 1.6                 | 0.0396159  | 0.9999855 | 16.6                | -0.0079442 | 0.99999399 | 31.6                | -0.1544147 | 0.99885093 | 46.6                | -0.2348299 | 0.99066448 |
| 1.7                 | 0.0396159  | 0.9999855 | 16.7                | -0.0079442 | 0.99999399 | 31.7                | -0.1574121 | 0.99883003 | 46.7                | -0.2348299 | 0.99066448 |
| 1.8                 | 0.0396159  | 0.9999855 | 16.8                | -0.0079442 | 0.99999399 | 31.8                | -0.1574121 | 0.99883003 | 46.8                | -0.2323766 | 0.99067217 |
| 1.9                 | 0.0396159  | 0.9999855 | 16.9                | -0.0079442 | 0.99999399 | 31.9                | -0.1512725 | 0.99875011 | 46.9                | -0.2380599 | 0.99035113 |
| 2.0                 | 0.0396159  | 0.9999855 | 17.0                | -0.0079442 | 0.99999399 | 32.0                | -0.1529635 | 0.9986737  | 47.0                | -0.2389595 | 0.99046611 |
| 2.1                 | 0.0396159  | 0.9999855 | 17.1                | -0.0017259 | 0.99999264 | 32.1                | -0.156736  | 0.99867418 | 47.1                | -0.2393935 | 0.99030011 |
| 2.2                 | 0.0396159  | 0.9999855 | 17.2                | -0.0017259 | 0.99999264 | 32.2                | -0.156736  | 0.99867418 | 47.2                | -0.2405997 | 0.99029991 |
| 2.3                 | 0.0396159  | 0.9999855 | 17.3                | -0.0017259 | 0.99999264 | 32.3                | -0.156736  | 0.99867418 | 47.3                | -0.2405997 | 0.99029991 |
| 2.4                 | 0.0396159  | 0.9999855 | 17.4                | -0.0017259 | 0.99999264 | 32.4                | -0.1582676 | 0.99859535 | 47.4                | -0.241101  | 0.99025686 |
| 2.5                 | 0.0396159  | 0.9999855 | 17.5                | -0.0017259 | 0.99999264 | 32.5                | -0.158427  | 0.99853785 | 47.5                | -0.2394429 | 0.99013839 |
| 2.6                 | 0.0396159  | 0.9999855 | 17.6                | -0.0017259 | 0.99999264 | 32.6                | -0.1618886 | 0.99851123 | 47.6                | -0.2393388 | 0.99020991 |
| 2.7                 | 0.0396159  | 0.9999855 | 17.7                | -0.0017259 | 0.99999264 | 32.7                | -0.1618886 | 0.99851123 | 47.7                | -0.2423939 | 0.98995614 |
| 2.8                 | 0.0396159  | 0.9999855 | 17.8                | -0.0017259 | 0.99999264 | 32.8                | -0.163947  | 0.99842078 | 47.8                | -0.2425636 | 0.98982648 |
| 2.9                 | 0.0396159  | 0.9999855 | 17.9                | -0.0017259 | 0.99999264 | 32.9                | -0.163947  | 0.99842078 | 47.9                | -0.2427504 | 0.98975858 |
| 3.0                 | 0.0396159  | 0.9999855 | 18.0                | -0.0432399 | 0.99999015 | 33.0                | -0.169675  | 0.99839733 | 48.0                | -0.2401648 | 0.98951923 |
| 3.1                 | 0.0396159  | 0.9999855 | 18.1                | -0.0432399 | 0.99999015 | 33.1                | -0.169675  | 0.99839733 | 48.1                | -0.2401648 | 0.98951923 |
| 3.2                 | 0.0396159  | 0.9999855 | 18.2                | -0.0432399 | 0.99999015 | 33.2                | -0.1672479 | 0.99839818 | 48.2                | -0.2407903 | 0.98949005 |
| 3.3                 | 0.0396159  | 0.9999855 | 18.3                | -0.0432399 | 0.99999015 | 33.3                | -0.1686579 | 0.99829728 | 48.3                | -0.2407903 | 0.98949005 |
| 3.4                 | 0.0396159  | 0.9999855 | 18.4                | -0.0432399 | 0.99999015 | 33.4                | -0.1697451 | 0.99820307 | 48.4                | -0.2416791 | 0.98943928 |
| 3.5                 | 0.0396159  | 0.9999855 | 18.5                | -0.0441256 | 0.99998599 | 33.5                | -0.1700108 | 0.99817082 | 48.5                | -0.2421366 | 0.98939859 |
| 3.6                 | 0.0396159  | 0.9999855 | 18.6                | -0.0441256 | 0.99998599 | 33.6                | -0.1700108 | 0.99817082 | 48.6                | -0.2421366 | 0.98939859 |
| 3.7                 | 0.0396159  | 0.9999855 | 18.7                | -0.0441256 | 0.99998599 | 33.7                | -0.1700108 | 0.99817082 | 48.7                | -0.2438257 | 0.98913226 |
| 3.8                 | 0.0396159  | 0.9999855 | 18.8                | -0.0441256 | 0.99998599 | 33.8                | -0.1688335 | 0.99813709 | 48.8                | -0.2434444 | 0.98911861 |
| 3.9                 | 0.0396159  | 0.9999855 | 18.9                | -0.0441256 | 0.99998599 | 33.9                | -0.1699112 | 0.99809886 | 48.9                | -0.2425422 | 0.98907924 |
| 4.0                 | 0.0396159  | 0.9999855 | 19.0                | -0.0441256 | 0.99998599 | 34.0                | -0.1705347 | 0.99797591 | 49.0                | -0.2475818 | 0.98899509 |
| 4.1                 | 0.0396159  | 0.9999855 | 19.1                | -0.0441256 | 0.99998599 | 34.1                | -0.1741373 | 0.99793463 | 49.1                | -0.2473391 | 0.98899609 |
| 4.2                 | 0.0396159  | 0.9999855 | 19.2                | -0.0441256 | 0.99998599 | 34.2                | -0.1741373 | 0.99793463 | 49.2                | -0.2477265 | 0.98893513 |
| 4.3                 | 0.0396159  | 0.9999855 | 19.3                | -0.0441256 | 0.99998599 | 34.3                | -0.1729121 | 0.99793471 | 49.3                | -0.2468943 | 0.98891724 |
| 4.4                 | 0.0396159  | 0.9999855 | 19.4                | -0.039819  | 0.99998087 | 34.4                | -0.1725586 | 0.99782728 | 49.4                | -0.2473182 | 0.98874791 |
| 4.5                 | 0.0396159  | 0.9999855 | 19.5                | -0.039819  | 0.99998087 | 34.5                | -0.1749612 | 0.99779018 | 49.5                | -0.2473182 | 0.98874791 |
| 4.6                 | 0.0396159  | 0.9999855 | 19.6                | -0.039819  | 0.99998087 | 34.6                | -0.1743861 | 0.99772675 | 49.6                | -0.2473298 | 0.98872974 |
| 4.7                 | 0.0396159  | 0.9999855 | 19.7                | -0.039819  | 0.99998087 | 34.7                | -0.1739407 | 0.99769714 | 49.7                | -0.2473298 | 0.98872974 |
| 4.8                 | 0.0396159  | 0.9999855 | 19.8                | -0.039819  | 0.99998087 | 34.8                | -0.1778126 | 0.99762377 | 49.8                | -0.2478132 | 0.98867597 |
| 4.9                 | 0.0396159  | 0.9999855 | 19.9                | -0.0450476 | 0.99977395 | 34.9                | -0.1771914 | 0.99758371 | 49.9                | -0.2453307 | 0.9884825  |
| 5.0                 | 0.0396159  | 0.9999855 | 20.0                | -0.0450476 | 0.99977395 | 35.0                | -0.1771623 | 0.9975476  | 50.0                | -0.2467002 | 0.9884802  |
| 5.1                 | 0.05551429 | 0.999997  | 20.1                | -0.0681923 | 0.9999663  | 35.1                | -0.1767466 | 0.99750262 | 50.1                | -0.2474723 | 0.98839145 |
| 5.2                 | 0.05551429 | 0.999997  | 20.2                | -0.0681923 | 0.9999663  | 35.2                | -0.1767466 | 0.99750262 | 50.2                | -0.2475662 | 0.98839145 |
| 5.3                 | 0.05551429 | 0.999997  | 20.3                | -0.0681923 | 0.9999663  | 35.3                | -0.1767466 | 0.99750262 | 50.3                | -0.2475662 | 0.98839145 |
| 5.4                 | 0.05551429 | 0.999997  | 20.4                | -0.0681923 | 0.9999663  | 35.4                | -0.1794783 | 0.99738651 | 50.4                | -0.2481512 | 0.98832206 |
| 5.5                 | 0.05551429 | 0.999997  | 20.5                | -0.0681923 | 0.9999663  | 35.5                | -0.1794783 | 0.99738651 | 50.5                | -0.2479129 | 0.98829913 |
| 5.6                 | 0.05551429 | 0.999997  | 20.6                | -0.0681923 | 0.9999663  | 35.6                | -0.1790323 | 0.99726357 | 50.6                | -0.2504366 | 0.98827913 |
| 5.7                 | 0.05551429 | 0.999997  | 20.7                | -0.0681923 | 0.9999663  | 35.7                | -0.1792851 | 0.99715083 | 50.7                | -0.2514733 | 0.98823436 |
| 5.8                 | 0.05551429 | 0.999997  | 20.8                | -0.0681923 | 0.9999663  | 35.8                | -0.1810301 | 0.99710372 | 50.8                | -0.2519424 | 0.98820797 |
| 5.9                 | 0.05551429 | 0.999997  | 20.9                | -0.0681923 | 0.9999663  | 35.9                | -0.1810301 | 0.99710372 | 50.9                | -0.2521148 | 0.9881313  |
| 6.0                 | 0.05551429 | 0.999997  | 21.0                | -0.0681923 | 0.9999663  | 36.0                | -0.18148   | 0.99703318 | 51.0                | -0.2530193 | 0.9881399  |
| 6.1                 | 0.05551429 | 0.999997  | 21.1                | -0.0681923 | 0.9999663  | 36.1                | -0.1824996 | 0.99698537 | 51.1                | -0.2529217 | 0.98801355 |
| 6.2                 | 0.05551429 | 0.999997  | 21.2                | -0.0674727 | 0.99994509 | 36.2                | -0.1823258 | 0.99692642 | 51.2                | -0.2540422 | 0.98803304 |
| 6.3                 | 0.05551429 | 0.999997  | 21.3                | -0.0674727 | 0.99994509 | 36.3                | -0.1814025 | 0.99697883 | 51.3                | -0.2540422 | 0.98803304 |
| 6.4                 | 0.05551429 | 0.999997  | 21.4                | -0.0674727 | 0.99994509 | 36.4                | -0.1836546 | 0.99679254 | 51.4                | -0.2556105 | 0.98794951 |
| 6.5                 | 0.05551429 | 0.999997  | 21.5                | -0.0674727 | 0.99994509 | 36.5                | -0.1836284 | 0.9967328  | 51.5                | -0.2556105 | 0.98794951 |
| 6.6                 | 0.05551429 | 0.999997  | 21.6                | -0.0674727 | 0.99994509 | 36.6                | -0.1833082 | 0.9966694  | 51.6                | -0.2557484 | 0.98786202 |
| 6.7                 | 0.05551429 | 0.999997  | 21.7                | -0.0674727 | 0.99994509 | 36.7                | -0.1825427 | 0.9966126  | 51.7                | -0.2557484 | 0.98786202 |
| 6.8                 | 0.05551429 | 0.999997  | 21.8                | -0.0696436 | 0.99993303 | 36.8                | -0.1825427 | 0.9966126  | 51.8                | -0.2557484 | 0.98786202 |
| 6.9                 | 0.05551429 | 0.999997  | 21.9                | -0.0696436 | 0.99993303 | 36.9                | -0.1813529 | 0.9965491  | 51.9                | -0.2540144 | 0.9876596  |
| 7.0                 | 0.05551429 | 0.999997  | 22.0                | -0.0696436 | 0.99993303 | 37.0                | -0.1793375 | 0.99647358 | 52.0                | -0.2535307 | 0.9876185  |
| 7.1                 | 0.05551429 | 0.999997  | 22.1                | -0.0616364 | 0.9999198  | 37.1                | -0.17654   | 0.99640307 | 52.1                | -0.2525795 | 0.9875798  |
| 7.2                 | 0.05551429 | 0.999997  | 22.2                | -0.0616364 | 0.9999198  | 37.2                | -0.1768707 | 0.99627558 | 52.2                | -0.2533667 | 0.98757502 |
| 7.3                 | 0.05551429 | 0.999997  | 22.3                | -0.0616364 | 0.9999198  | 37.3                | -0.1771374 | 0.9961317  | 52.3                | -0.252863  | 0.98745555 |
| 7.4                 | 0.05551429 | 0.999997  | 22.4                | -0.0560587 | 0.99990443 | 37.4                | -0.1780916 | 0.99612394 | 52.4                | -0.252863  | 0.98745555 |
| 7.5                 | 0.01577905 | 0.9999955 | 22.5                | -0.0560587 | 0.99990443 | 37.5                | -0.1805074 | 0.99606502 | 52.5                | -0.2560894 | 0.98737297 |
| 7.6                 | 0.01577905 | 0.9999955 | 22.6                | -0.0560587 | 0.99990443 | 37.6                | -0.1807124 | 0.9960179  | 52.6                | -0.2570993 | 0.98735142 |
| 7.7                 | 0.01577905 | 0.9999955 | 22.7                | -0.0560587 | 0.99990443 | 37.7                | -0.1807124 | 0.9960179  | 52.7                | -0.2570993 | 0.98735142 |
| 7.8                 | 0.01577905 | 0.9999955 | 22.8                | -0.0560587 | 0.99990443 | 37.8                | -0.1791993 | 0.99586249 | 5                   |            |            |



|      |            |            |      |            |            |      |            |            |       |            |            |
|------|------------|------------|------|------------|------------|------|------------|------------|-------|------------|------------|
| 11.8 | 0.01577905 | 0.9999955  | 26.8 | -0.0752688 | 0.99961935 | 41.8 | -0.2079259 | 0.99303608 | 56.8  | -0.2851838 | 0.98491109 |
| 11.9 | 0.01577905 | 0.9999955  | 26.9 | -0.0752688 | 0.99961935 | 41.9 | -0.2079259 | 0.99303608 | 56.9  | -0.2848763 | 0.98484475 |
| 12   | 0.01577905 | 0.9999955  | 27   | -0.0752688 | 0.99961935 | 42   | -0.2081232 | 0.99303322 | 57    | -0.2848763 | 0.98484475 |
| 12.1 | 0.01577905 | 0.9999955  | 27.1 | -0.0752688 | 0.99961935 | 42.1 | -0.2071725 | 0.99292845 | 57.1  | -0.2845696 | 0.98462613 |
| 12.2 | 0.01577905 | 0.9999955  | 27.2 | -0.0752688 | 0.99961935 | 42.2 | -0.2057584 | 0.99282995 | 57.2  | -0.2827654 | 0.98449489 |
| 12.3 | 0.01577905 | 0.9999955  | 27.3 | -0.0829201 | 0.99951801 | 42.3 | -0.2059414 | 0.9927958  | 57.3  | -0.2833363 | 0.98444771 |
| 12.4 | 0.01577905 | 0.9999955  | 27.4 | -0.0848844 | 0.99958615 | 42.4 | -0.2087616 | 0.99275689 | 57.4  | -0.2832189 | 0.98428911 |
| 12.5 | 0.01577905 | 0.9999955  | 27.5 | -0.0947895 | 0.99958838 | 42.5 | -0.2112993 | 0.99279275 | 57.5  | -0.2840354 | 0.98425948 |
| 12.6 | 0.01577905 | 0.9999955  | 27.6 | -0.1030386 | 0.99955161 | 42.6 | -0.2112993 | 0.99279275 | 57.6  | -0.2856457 | 0.98423292 |
| 12.7 | 0.01577905 | 0.9999955  | 27.7 | -0.1030386 | 0.99955161 | 42.7 | -0.2096475 | 0.9926942  | 57.7  | -0.285267  | 0.98409284 |
| 12.8 | 0.01577905 | 0.9999955  | 27.8 | -0.1071444 | 0.99954925 | 42.8 | -0.2104578 | 0.99269111 | 57.8  | -0.2845177 | 0.98406779 |
| 12.9 | 0.01577905 | 0.9999955  | 27.9 | -0.1071444 | 0.99954925 | 42.9 | -0.2115426 | 0.99269053 | 57.9  | -0.2868093 | 0.98395785 |
| 13   | 0.01577905 | 0.9999955  | 28   | -0.1155005 | 0.99950877 | 43   | -0.2123509 | 0.99257083 | 58    | -0.2867462 | 0.98386197 |
| 13.1 | 0.01577905 | 0.9999955  | 28.1 | -0.118394  | 0.99950406 | 43.1 | -0.2129707 | 0.99245364 | 58.1  | -0.2887402 | 0.9837795  |
| 13.2 | 0.01577905 | 0.9999955  | 28.2 | -0.1181089 | 0.99947022 | 43.2 | -0.2123513 | 0.99241934 | 58.2  | -0.290802  | 0.98383091 |
| 13.3 | 0.01577905 | 0.9999955  | 28.3 | -0.1226298 | 0.99946457 | 43.3 | -0.2126962 | 0.99241263 | 58.3  | -0.290683  | 0.98370122 |
| 13.4 | 0.01577905 | 0.9999955  | 28.4 | -0.1226298 | 0.99946457 | 43.4 | -0.2111078 | 0.99232095 | 58.4  | -0.2905197 | 0.98364795 |
| 13.5 | 0.01577905 | 0.9999955  | 28.5 | -0.1239019 | 0.99942599 | 43.5 | -0.2111078 | 0.99232095 | 58.5  | -0.2906197 | 0.98364795 |
| 13.6 | 0.01577905 | 0.9999955  | 28.6 | -0.1239019 | 0.99942599 | 43.6 | -0.213362  | 0.99229697 | 58.6  | -0.2900861 | 0.98331767 |
| 13.7 | 0.01577905 | 0.9999955  | 28.7 | -0.12387   | 0.99941552 | 43.7 | -0.2130411 | 0.99217084 | 58.7  | -0.2902529 | 0.98318249 |
| 13.8 | 0.01577905 | 0.9999955  | 28.8 | -0.12387   | 0.99941552 | 43.8 | -0.2129159 | 0.99205141 | 58.8  | -0.2913606 | 0.98320259 |
| 13.9 | 0.01577905 | 0.9999955  | 28.9 | -0.12387   | 0.99941552 | 43.9 | -0.2129159 | 0.99205141 | 58.9  | -0.2917741 | 0.98313901 |
| 14   | 0.01577905 | 0.9999955  | 29   | -0.1214683 | 0.99937455 | 44   | -0.2145022 | 0.99205458 | 59    | -0.292587  | 0.98316101 |
| 14.1 | 0.01577905 | 0.9999955  | 29.1 | -0.1200419 | 0.99932866 | 44.1 | -0.2161922 | 0.99202546 | 59.1  | -0.292653  | 0.9829422  |
| 14.2 | 0.01577905 | 0.9999955  | 29.2 | -0.1276461 | 0.99931914 | 44.2 | -0.2193248 | 0.99188519 | 59.2  | -0.292653  | 0.9829422  |
| 14.3 | 0.01577905 | 0.9999955  | 29.3 | -0.1276461 | 0.99931914 | 44.3 | -0.2199436 | 0.99188773 | 59.3  | -0.294425  | 0.98291295 |
| 14.4 | 0.01577905 | 0.9999955  | 29.4 | -0.1276461 | 0.99931914 | 44.4 | -0.2204544 | 0.99185473 | 59.4  | -0.2946434 | 0.98285236 |
| 14.5 | 0.01577905 | 0.9999955  | 29.5 | -0.1276461 | 0.99931914 | 44.5 | -0.2204544 | 0.99185473 | 59.5  | -0.2942292 | 0.98283009 |
| 14.6 | 0.01577905 | 0.9999955  | 29.6 | -0.1276461 | 0.99931914 | 44.6 | -0.2204344 | 0.99185473 | 59.6  | -0.2956243 | 0.98280462 |
| 14.7 | 0.01577905 | 0.9999955  | 29.7 | -0.1309862 | 0.99926589 | 44.7 | -0.2187584 | 0.99182059 | 59.7  | -0.2950589 | 0.98263346 |
| 14.8 | 0.01577905 | 0.9999955  | 29.8 | -0.136099  | 0.99925215 | 44.8 | -0.2187832 | 0.99170979 | 59.8  | -0.2966677 | 0.98261671 |
| 14.9 | 0.01577905 | 0.9999955  | 29.9 | -0.131144  | 0.99920648 | 44.9 | -0.2203963 | 0.99170835 | 59.9  | -0.2968603 | 0.98251627 |
| 60   | -0.2986803 | 0.98251627 | 75   | -0.3747312 | 0.96441523 | 90   | -0.3873753 | 0.91188172 | 105   | -0.4168153 | 0.89766747 |
| 60.1 | -0.2986803 | 0.98251627 | 75.1 | -0.375815  | 0.96408322 | 90.1 | -0.3873753 | 0.91188172 | 105.1 | -0.4168153 | 0.89766747 |
| 60.2 | -0.2978097 | 0.98251413 | 75.2 | -0.3747419 | 0.9637615  | 90.2 | -0.3877809 | 0.91161212 | 105.2 | -0.4169937 | 0.89767201 |
| 60.3 | -0.2978097 | 0.98251413 | 75.3 | -0.3756244 | 0.96350473 | 90.3 | -0.3874221 | 0.91175782 | 105.3 | -0.4172578 | 0.89759666 |
| 60.4 | -0.2974613 | 0.98247722 | 75.4 | -0.3770654 | 0.963215   | 90.4 | -0.3875457 | 0.9115306  | 105.4 | -0.4175473 | 0.89753006 |
| 60.5 | -0.3001387 | 0.98240453 | 75.5 | -0.37748   | 0.96290615 | 90.5 | -0.3875173 | 0.91101223 | 105.5 | -0.4176174 | 0.89744357 |
| 60.6 | -0.3016767 | 0.98237168 | 75.6 | -0.3795831 | 0.96252712 | 90.6 | -0.3879945 | 0.91083201 | 105.6 | -0.4176174 | 0.89744357 |
| 60.7 | -0.3030129 | 0.98234609 | 75.7 | -0.3807104 | 0.96228854 | 90.7 | -0.388172  | 0.91060209 | 105.7 | -0.4182226 | 0.89743006 |
| 60.8 | -0.3038018 | 0.98225569 | 75.8 | -0.3804171 | 0.96217989 | 90.8 | -0.3887876 | 0.91041033 | 105.8 | -0.4176193 | 0.89731134 |
| 60.9 | -0.3035142 | 0.98220211 | 75.9 | -0.3815544 | 0.96176827 | 90.9 | -0.3887441 | 0.90991331 | 105.9 | -0.4176193 | 0.89731134 |
| 61   | -0.304798  | 0.98216175 | 76   | -0.3822053 | 0.961635   | 91   | -0.3874889 | 0.90991331 | 106   | -0.4176193 | 0.89731134 |
| 61.1 | -0.30546   | 0.98213564 | 76.1 | -0.3830809 | 0.96150123 | 91.1 | -0.3870589 | 0.90958211 | 106.1 | -0.4181103 | 0.89709222 |
| 61.2 | -0.3061224 | 0.98200852 | 76.2 | -0.3835018 | 0.96132473 | 91.2 | -0.3873105 | 0.90901378 | 106.2 | -0.4181103 | 0.89709222 |
| 61.3 | -0.3061224 | 0.98200852 | 76.3 | -0.383129  | 0.96109189 | 91.3 | -0.3875182 | 0.90897707 | 106.3 | -0.4180335 | 0.89704335 |
| 61.4 | -0.3068387 | 0.98201461 | 76.4 | -0.3823422 | 0.96067765 | 91.4 | -0.3875182 | 0.90897707 | 106.4 | -0.4179218 | 0.89698881 |
| 61.5 | -0.3069075 | 0.98193118 | 76.5 | -0.382789  | 0.96042411 | 91.5 | -0.3880534 | 0.90851397 | 106.5 | -0.4179218 | 0.89698881 |
| 61.6 | -0.3081039 | 0.98196166 | 76.6 | -0.3834372 | 0.96012704 | 91.6 | -0.3879021 | 0.90851397 | 106.6 | -0.4183887 | 0.89700113 |
| 61.7 | -0.3088275 | 0.98192553 | 76.7 | -0.3828196 | 0.95975973 | 91.7 | -0.3884438 | 0.90805041 | 106.7 | -0.4185522 | 0.89691519 |
| 61.8 | -0.3103501 | 0.98185868 | 76.8 | -0.3835678 | 0.95964601 | 91.8 | -0.3883483 | 0.90789206 | 106.8 | -0.4185522 | 0.89691519 |
| 61.9 | -0.3102244 | 0.9817746  | 76.9 | -0.382986  | 0.95926558 | 91.9 | -0.3883283 | 0.90766003 | 106.9 | -0.4185347 | 0.8968797  |
| 62   | -0.3136627 | 0.98171504 | 77   | -0.3834765 | 0.95913709 | 92   | -0.3884534 | 0.90763282 | 107   | -0.4192908 | 0.89685652 |
| 62.1 | -0.3125659 | 0.98164204 | 77.1 | -0.3837673 | 0.95904005 | 92.1 | -0.3887041 | 0.90748173 | 107.1 | -0.4193433 | 0.89689149 |
| 62.2 | -0.3121897 | 0.98158587 | 77.2 | -0.3859074 | 0.95886587 | 92.2 | -0.3894723 | 0.90722537 | 107.2 | -0.4194877 | 0.89677054 |
| 62.3 | -0.3117869 | 0.9815344  | 77.3 | -0.3868006 | 0.95845043 | 92.3 | -0.3897413 | 0.90718146 | 107.3 | -0.4198662 | 0.89671161 |
| 62.4 | -0.3117869 | 0.9815344  | 77.4 | -0.3869254 | 0.95831355 | 92.4 | -0.3899223 | 0.90710157 | 107.4 | -0.4200138 | 0.89664966 |
| 62.5 | -0.3113515 | 0.9814746  | 77.5 | -0.3858355 | 0.95782136 | 92.5 | -0.3901015 | 0.90703752 | 107.5 | -0.4194905 | 0.89658117 |
| 62.6 | -0.3122104 | 0.98137678 | 77.6 | -0.3858163 | 0.95772657 | 92.6 | -0.3901015 | 0.90703752 | 107.6 | -0.4194905 | 0.89658117 |
| 62.7 | -0.3137756 | 0.98132174 | 77.7 | -0.3863106 | 0.95719859 | 92.7 | -0.3903659 | 0.90687972 | 107.7 | -0.4194905 | 0.89658117 |
| 62.8 | -0.3143563 | 0.98123035 | 77.8 | -0.3858244 | 0.95663279 | 92.8 | -0.3901565 | 0.90670731 | 107.8 | -0.4201732 | 0.8965236  |
| 62.9 | -0.3138237 | 0.98112712 | 77.9 | -0.386814  | 0.9565501  | 92.9 | -0.3901868 | 0.90672255 | 107.9 | -0.4200301 | 0.89639767 |
| 63   | -0.3154527 | 0.98113195 | 78   | -0.3861888 | 0.95604637 | 93   | -0.3907079 | 0.90666328 | 108   | -0.420485  | 0.89643453 |
| 63.1 | -0.3152166 | 0.98109917 | 78.1 | -0.3865645 | 0.95568755 | 93.1 | -0.3907045 | 0.90662936 | 108.1 | -0.420708  | 0.89642338 |
| 63.2 | -0.3170842 | 0.98103838 | 78.2 | -0.3852077 | 0.9554751  | 93.2 | -0.3909086 | 0.90666636 | 108.2 | -0.4206938 | 0.89641705 |
| 63.3 | -0.3174757 | 0.98098155 | 78.3 | -0.3855210 | 0.95463195 | 93.3 | -0.3916688 | 0.90644493 | 108.3 | -0.4206938 | 0.89641705 |
| 63.4 | -0.3179404 | 0.98088899 | 78.4 | -0.3859219 | 0.95449969 | 93.4 | -0.392427  | 0.90642807 | 108.4 | -0.4210337 | 0.89635854 |
| 63.5 | -0.3176631 | 0.98082454 | 78.5 | -0.386716  | 0.95436416 | 93.5 | -0.392536  | 0.90638167 | 108.5 | -0.4210337 | 0.89635854 |
| 63.6 | -0.3215472 | 0.9807396  | 78.6 | -0.38541   | 0.95356975 | 93.6 | -0.3928064 | 0.9062113  | 108.6 | -0.4208301 | 0.89629967 |
| 63.7 | -0.3215472 | 0.9807396  | 78.7 | -0.3851283 | 0.95353498 | 93.7 | -0.3931635 | 0.90597932 | 108.7 | -0.4207761 | 0.89595816 |
| 63.8 | -0.3215472 | 0.9807396  | 78.8 | -0.3860185 | 0.95305621 | 93.8 | -0.3931635 | 0.90597932 | 108.8 | -0.4211889 | 0.89592516 |
| 63.9 | -0.3216162 | 0.9806259  | 78.9 | -0.3859151 | 0.95284124 | 93.9 | -0.3934592 | 0.90579532 | 108.9 | -0.4211345 | 0.89575421 |
| 64   | -0.3236726 | 0.98073209 | 79   | -0.3862955 | 0.95266665 | 94   | -0.3935013 | 0.90574345 | 109   | -0.4215864 | 0.89576507 |
| 64.1 | -0.3248671 | 0.98056214 | 79.1 | -0.387044  | 0.95235258 | 94.1 | -0.3930155 | 0.90573752 | 109.1 | -0.4215864 | 0.89576507 |
| 64.2 | -0.3250739 | 0.980552   | 79.2 | -0.3867024 | 0.95140614 | 94.2 | -0.3942322 | 0.90554558 | 109.2 | -0.4215864 | 0.89576507 |
| 64.3 | -0.3252542 | 0.98059541 | 79.3 | -0.386619  | 0.95121786 | 94.3 | -0.3949715 | 0.90551185 | 109.3 | -0.4218935 | 0.89567333 |
| 64.4 | -0.3273203 | 0.98052443 | 79.4 | -0.3867823 | 0.95089333 | 94.4 | -0.3957044 | 0.90532416 | 109.4 | -0.4222761 | 0.89567333 |
| 64.5 | -0.3280482 | 0.98041692 | 79.5 | -0.3864175 | 0.95060257 | 94.5 | -0.3955348 | 0.90513373 | 109.5 | -0.4222761 | 0.89567333 |
| 64.6 | -0.3289303 | 0.98033632 | 79.6 | -0.3865356 | 0.95017211 | 94.6 | -0.3959779 | 0.90496197 | 109.6 | -0.4222761 | 0.89567333 |
| 64.7 | -0.3284466 | 0.980207   | 79.7 | -0.387207  | 0.94982858 | 94.7 | -0.396007  | 0.9047     |       |            |            |





|       |            |            |       |            |            |       |            |            |       |            |            |
|-------|------------|------------|-------|------------|------------|-------|------------|------------|-------|------------|------------|
| 183.1 | -0.5032401 | 0.853151   | 198.1 | -0.5070332 | 0.84585057 | 213.1 | -0.508139  | 0.8460262  | 228.1 | -0.5083544 | 0.8447703  |
| 183.2 | -0.5035255 | 0.85308388 | 198.2 | -0.5072022 | 0.84604238 | 213.2 | -0.508139  | 0.8460262  | 228.2 | -0.5083544 | 0.8447703  |
| 183.3 | -0.5038128 | 0.85294933 | 198.3 | -0.5072022 | 0.84604238 | 213.3 | -0.508139  | 0.8460262  | 228.3 | -0.5083544 | 0.8447703  |
| 183.4 | -0.5038128 | 0.85294933 | 198.4 | -0.5071365 | 0.84601723 | 213.4 | -0.508139  | 0.8460262  | 228.4 | -0.5084571 | 0.84491773 |
| 183.5 | -0.5038128 | 0.85294933 | 198.5 | -0.5071365 | 0.84601723 | 213.5 | -0.5081136 | 0.84593306 | 228.5 | -0.5084571 | 0.84491773 |
| 183.6 | -0.5039762 | 0.8526617  | 198.6 | -0.5071365 | 0.84601723 | 213.6 | -0.508188  | 0.84598674 | 228.6 | -0.5084571 | 0.84491773 |
| 183.7 | -0.5039388 | 0.85252447 | 198.7 | -0.5071365 | 0.84601723 | 213.7 | -0.5081633 | 0.84593484 | 228.7 | -0.5084571 | 0.84491773 |
| 183.8 | -0.5037781 | 0.85236252 | 198.8 | -0.507095  | 0.84611103 | 213.8 | -0.5081633 | 0.84593484 | 228.8 | -0.5084571 | 0.84491773 |
| 183.9 | -0.5037781 | 0.85236252 | 198.9 | -0.5072951 | 0.84614865 | 213.9 | -0.5081633 | 0.84593484 | 228.9 | -0.5084571 | 0.84491773 |
| 184   | -0.503404  | 0.85208355 | 199   | -0.5073609 | 0.84617894 | 214   | -0.5081633 | 0.84593484 | 229   | -0.5084571 | 0.84491773 |
| 184.1 | -0.5035962 | 0.85225422 | 199.1 | -0.5073609 | 0.84617894 | 214.1 | -0.5081616 | 0.84593284 | 229.1 | -0.5084571 | 0.84491773 |
| 184.2 | -0.5037651 | 0.85236454 | 199.2 | -0.5074835 | 0.84614818 | 214.2 | -0.5081616 | 0.84593284 | 229.2 | -0.5084571 | 0.84491773 |
| 184.3 | -0.5036205 | 0.85220064 | 199.3 | -0.5074854 | 0.84613188 | 214.3 | -0.5079798 | 0.84576889 | 229.3 | -0.5084571 | 0.84491773 |
| 184.4 | -0.503915  | 0.85208862 | 199.4 | -0.5073621 | 0.84607507 | 214.4 | -0.5079798 | 0.84576889 | 229.4 | -0.508589  | 0.84485265 |
| 184.5 | -0.5039189 | 0.85193936 | 199.5 | -0.5072804 | 0.84592449 | 214.5 | -0.5079831 | 0.84580954 | 229.5 | -0.508589  | 0.84485265 |
| 184.6 | -0.5038043 | 0.85175793 | 199.6 | -0.5072804 | 0.84592449 | 214.6 | -0.5079831 | 0.84580954 | 229.6 | -0.508589  | 0.84485265 |
| 184.7 | -0.5038043 | 0.85175793 | 199.7 | -0.5072804 | 0.84592449 | 214.7 | -0.5079831 | 0.84580954 | 229.7 | -0.508589  | 0.84485265 |
| 184.8 | -0.504056  | 0.85163811 | 199.8 | -0.507331  | 0.84585652 | 214.8 | -0.5079831 | 0.84580954 | 229.8 | -0.508589  | 0.84485265 |
| 184.9 | -0.504048  | 0.85149562 | 199.9 | -0.507331  | 0.84585652 | 214.9 | -0.5079831 | 0.84580954 | 229.9 | -0.508589  | 0.84485265 |
| 185   | -0.504048  | 0.85149562 | 200   | -0.507331  | 0.84585652 | 215   | -0.5079831 | 0.84580954 | 230   | -0.508589  | 0.84485265 |
| 185.1 | -0.5040238 | 0.85137299 | 200.1 | -0.5072784 | 0.84575965 | 215.1 | -0.5079831 | 0.84580954 | 230.1 | -0.508589  | 0.84485265 |
| 185.2 | -0.5040512 | 0.85124957 | 200.2 | -0.5072784 | 0.84575965 | 215.2 | -0.5079831 | 0.84580954 | 230.2 | -0.508589  | 0.84485265 |
| 185.3 | -0.5040512 | 0.85124957 | 200.3 | -0.5072784 | 0.84575965 | 215.3 | -0.5079831 | 0.84580954 | 230.3 | -0.508589  | 0.84485265 |
| 185.4 | -0.5040512 | 0.85124957 | 200.4 | -0.5072784 | 0.84575965 | 215.4 | -0.5080584 | 0.8458419  | 230.4 | -0.508589  | 0.84485265 |
| 185.5 | -0.5046931 | 0.85117489 | 200.5 | -0.5072784 | 0.84575965 | 215.5 | -0.5080584 | 0.8458419  | 230.5 | -0.508589  | 0.84485265 |
| 185.6 | -0.5046654 | 0.85100877 | 200.6 | -0.5072784 | 0.84575965 | 215.6 | -0.5083174 | 0.84583522 | 230.6 | -0.508589  | 0.84485265 |
| 185.7 | -0.5050241 | 0.85097326 | 200.7 | -0.5072675 | 0.84580117 | 215.7 | -0.5083958 | 0.84588604 | 230.7 | -0.508589  | 0.84485265 |
| 185.8 | -0.5040481 | 0.850698   | 200.8 | -0.5073355 | 0.84593272 | 215.8 | -0.5083958 | 0.84588604 | 230.8 | -0.508478  | 0.8448413  |
| 185.9 | -0.5049481 | 0.850698   | 200.9 | -0.5073355 | 0.84593272 | 215.9 | -0.5083958 | 0.84588604 | 230.9 | -0.508478  | 0.8448413  |
| 186   | -0.505093  | 0.8505553  | 201   | -0.5073355 | 0.84593272 | 216   | -0.5083958 | 0.84588604 | 231   | -0.508478  | 0.8448413  |
| 186.1 | -0.505093  | 0.8505553  | 201.1 | -0.5073355 | 0.84593272 | 216.1 | -0.5083958 | 0.84588604 | 231.1 | -0.508478  | 0.8448413  |
| 186.2 | -0.505117  | 0.85039225 | 201.2 | -0.5074647 | 0.84613578 | 216.2 | -0.5085218 | 0.8457721  | 231.2 | -0.508478  | 0.8448413  |
| 186.3 | -0.505117  | 0.85039225 | 201.3 | -0.5074647 | 0.84613578 | 216.3 | -0.5085218 | 0.8457721  | 231.3 | -0.508478  | 0.8448413  |
| 186.4 | -0.5051551 | 0.850237   | 201.4 | -0.5074647 | 0.84613578 | 216.4 | -0.5085218 | 0.8457721  | 231.4 | -0.508478  | 0.8448413  |
| 186.5 | -0.505009  | 0.85001967 | 201.5 | -0.5074647 | 0.84613578 | 216.5 | -0.5085218 | 0.8457721  | 231.5 | -0.5087607 | 0.84479083 |
| 186.6 | -0.505009  | 0.85001967 | 201.6 | -0.5074549 | 0.84595711 | 216.6 | -0.5085218 | 0.8457721  | 231.6 | -0.5086973 | 0.8446678  |
| 186.7 | -0.5046546 | 0.84966281 | 201.7 | -0.5074549 | 0.84595711 | 216.7 | -0.5085218 | 0.8457721  | 231.7 | -0.508788  | 0.8447276  |
| 186.8 | -0.504228  | 0.84953987 | 201.8 | -0.5074844 | 0.84601115 | 216.8 | -0.5080537 | 0.84561163 | 231.8 | -0.5088349 | 0.84475348 |
| 186.9 | -0.5046174 | 0.84933459 | 201.9 | -0.5074844 | 0.84601115 | 216.9 | -0.5080537 | 0.84561163 | 231.9 | -0.508788  | 0.8447276  |
| 187   | -0.5046174 | 0.84933459 | 202   | -0.5074844 | 0.84601115 | 217   | -0.5080537 | 0.84561163 | 232   | -0.5088349 | 0.84475348 |
| 187.1 | -0.5047506 | 0.84914557 | 202.1 | -0.5074844 | 0.84601115 | 217.1 | -0.5080537 | 0.84561163 | 232.1 | -0.5088349 | 0.84475348 |
| 187.2 | -0.5046907 | 0.84896877 | 202.2 | -0.5076678 | 0.84598877 | 217.2 | -0.5080537 | 0.84561163 | 232.2 | -0.5088349 | 0.84475348 |
| 187.3 | -0.5046961 | 0.84876063 | 202.3 | -0.5076678 | 0.84598877 | 217.3 | -0.5080537 | 0.84561163 | 232.3 | -0.5088349 | 0.84475348 |
| 187.4 | -0.5047912 | 0.8486057  | 202.4 | -0.50781   | 0.8461275  | 217.4 | -0.5082925 | 0.84563052 | 232.4 | -0.508964  | 0.84474581 |
| 187.5 | -0.5047912 | 0.8486057  | 202.5 | -0.50781   | 0.8461275  | 217.5 | -0.5082925 | 0.84563052 | 232.5 | -0.508964  | 0.84474581 |
| 187.6 | -0.5047912 | 0.8486057  | 202.6 | -0.50781   | 0.8461275  | 217.6 | -0.5082925 | 0.84563052 | 232.6 | -0.508964  | 0.84474581 |
| 187.7 | -0.504992  | 0.84844583 | 202.7 | -0.50781   | 0.8461275  | 217.7 | -0.5082925 | 0.84563052 | 232.7 | -0.508964  | 0.84474581 |
| 187.8 | -0.504992  | 0.84844583 | 202.8 | -0.50781   | 0.8461275  | 217.8 | -0.5080474 | 0.84560519 | 232.8 | -0.508964  | 0.84474581 |
| 187.9 | -0.5051313 | 0.84854575 | 202.9 | -0.50781   | 0.8461275  | 217.9 | -0.508317  | 0.84561465 | 232.9 | -0.508964  | 0.84474581 |
| 188   | -0.5046494 | 0.8482566  | 203   | -0.50781   | 0.8461275  | 218   | -0.508317  | 0.84561465 | 233   | -0.508964  | 0.84474581 |
| 188.1 | -0.504904  | 0.84808846 | 203.1 | -0.50781   | 0.8461275  | 218.1 | -0.508317  | 0.84561465 | 233.1 | -0.508964  | 0.84474581 |
| 188.2 | -0.504904  | 0.84808846 | 203.2 | -0.50781   | 0.8461275  | 218.2 | -0.508317  | 0.84561465 | 233.2 | -0.508964  | 0.84474581 |
| 188.3 | -0.5050738 | 0.84768795 | 203.3 | -0.5079647 | 0.8461336  | 218.3 | -0.508317  | 0.84561465 | 233.3 | -0.508964  | 0.84474581 |
| 188.4 | -0.5050738 | 0.84768795 | 203.4 | -0.5079647 | 0.8461336  | 218.4 | -0.508317  | 0.84561465 | 233.4 | -0.508964  | 0.84474581 |
| 188.5 | -0.5049599 | 0.84745677 | 203.5 | -0.5082113 | 0.84637106 | 218.5 | -0.508317  | 0.84561465 | 233.5 | -0.508964  | 0.84474581 |
| 188.6 | -0.5051843 | 0.84729266 | 203.6 | -0.5082113 | 0.84637106 | 218.6 | -0.508317  | 0.84561465 | 233.6 | -0.508964  | 0.84474581 |
| 188.7 | -0.5051843 | 0.84729266 | 203.7 | -0.5081562 | 0.84637163 | 218.7 | -0.508317  | 0.84561465 | 233.7 | -0.508964  | 0.84474581 |
| 188.8 | -0.5051119 | 0.84719123 | 203.8 | -0.5081562 | 0.84637163 | 218.8 | -0.508317  | 0.84561465 | 233.8 | -0.509349  | 0.84480142 |
| 188.9 | -0.5054835 | 0.84715019 | 203.9 | -0.5081562 | 0.84637163 | 218.9 | -0.508317  | 0.84561465 | 233.9 | -0.509349  | 0.84480142 |
| 189   | -0.5054351 | 0.84682517 | 204   | -0.5081562 | 0.84637163 | 219   | -0.508317  | 0.84561465 | 234   | -0.509349  | 0.84480142 |
| 189.1 | -0.5054351 | 0.84682517 | 204.1 | -0.5081562 | 0.84637163 | 219.1 | -0.507948  | 0.84540869 | 234.1 | -0.5091842 | 0.84462219 |
| 189.2 | -0.5056342 | 0.84665127 | 204.2 | -0.5081562 | 0.84637163 | 219.2 | -0.507948  | 0.84540869 | 234.2 | -0.5091842 | 0.84462219 |
| 189.3 | -0.5053392 | 0.846213   | 204.3 | -0.5081562 | 0.84637163 | 219.3 | -0.507948  | 0.84540869 | 234.3 | -0.5091842 | 0.84462219 |
| 189.4 | -0.5053392 | 0.846213   | 204.4 | -0.5081562 | 0.84637163 | 219.4 | -0.50807   | 0.84549893 | 234.4 | -0.5094162 | 0.8446048  |
| 189.5 | -0.5053392 | 0.846213   | 204.5 | -0.5081562 | 0.84637163 | 219.5 | -0.50807   | 0.84549893 | 234.5 | -0.5094162 | 0.8446048  |
| 189.6 | -0.505634  | 0.84586421 | 204.6 | -0.5081562 | 0.84637163 | 219.6 | -0.50807   | 0.84549893 | 234.6 | -0.5094162 | 0.8446048  |
| 189.7 | -0.505634  | 0.84586421 | 204.7 | -0.5081562 | 0.84637163 | 219.7 | -0.50807   | 0.84549893 | 234.7 | -0.5094162 | 0.8446048  |
| 189.8 | -0.5055859 | 0.8458711  | 204.8 | -0.5081562 | 0.84637163 | 219.8 | -0.50807   | 0.84549893 | 234.8 | -0.509465  | 0.84458427 |
| 189.9 | -0.5058589 | 0.8458711  | 204.9 | -0.5080806 | 0.84634107 | 219.9 | -0.5088538 | 0.84538535 | 234.9 | -0.509465  | 0.84458427 |
| 190   | -0.5055903 | 0.8456306  | 205   | -0.5080806 | 0.84634107 | 220   | -0.5088453 | 0.84538535 | 235   | -0.509465  | 0.84458427 |
| 190.1 | -0.5055903 | 0.8456306  | 205.1 | -0.5080806 | 0.84634107 | 220.1 | -0.5088453 | 0.84538535 | 235.1 | -0.509465  | 0.84458427 |
| 190.2 | -0.5055903 | 0.8456306  | 205.2 | -0.5080806 | 0.84634107 | 220.2 | -0.5088453 | 0.84538535 | 235.2 | -0.509465  | 0.84458427 |
| 190.3 | -0.505903  | 0.8456306  | 205.3 | -0.5080806 | 0.84634107 | 220.3 | -0.5088453 | 0.84538535 | 235.3 | -0.509465  | 0.84458427 |
| 190.4 | -0.505903  | 0.8456306  | 205.4 | -0.5080806 | 0.84634107 | 220.4 | -0.5088453 | 0.84538535 | 235.4 | -0.509465  | 0.84458427 |
| 190.5 | -0.505903  | 0.8456306  | 205.5 | -0.5080806 | 0.84634107 | 220.5 | -0.5088453 | 0.84538535 | 235.5 | -0.509465  | 0.84458427 |
| 190.6 | -0.505903  | 0.8456306  | 205.6 | -0.5080806 | 0.84634107 | 220.6 | -0.5088453 | 0.84538535 | 235.6 | -0.509465  | 0.84458427 |
| 190.7 | -0.505903  | 0.8456306  | 205.7 | -0.5080806 | 0.84634107 | 220.7 | -0.5088453 | 0.84538535 | 235.7 | -0.5097582 | 0.84456146 |
| 190.8 | -0.505903  | 0.8456306  | 205.8 | -0.5080806 | 0.84634107 | 220.8 | -0.5089471 | 0.84546629 | 235.8 | -0.5097582 | 0.84456146 |
| 190.9 | -0.505903  | 0.8456306  |       |            |            |       |            |            |       |            |            |

Corresponding p-values for PRCC sensitivity indices

| Time discretization | alpha      | [LACT]_0 | Time discretization | alpha      | [LACT]_0              | Time discretization | alpha      | [LACT]_0  | Time discretization | alpha      | [LACT]_0  |
|---------------------|------------|----------|---------------------|------------|-----------------------|---------------------|------------|-----------|---------------------|------------|-----------|
| 0                   | 0          | 0        | 15                  | 0.8386521  | 0                     | 30                  | 0.08971732 | 4.88E-235 | 45                  | 0.00370747 | 1.10E-150 |
| 0.1                 | 0          | 0        | 15.1                | 0.8386521  | 0                     | 30.1                | 0.08971732 | 4.88E-235 | 45.1                | 0.00382982 | 1.62E-150 |
| 0.2                 | 0          | 0        | 15.2                | 0.8386521  | 0                     | 30.2                | 0.08971732 | 4.88E-235 | 45.2                | 0.00359635 | 2.36E-150 |
| 0.3                 | 0          | 0        | 15.3                | 0.8386521  | 0                     | 30.3                | 0.08743097 | 4.33E-235 | 45.3                | 0.00348123 | 2.18E-150 |
| 0.4                 | 0          | 0        | 15.4                | 0.8386521  | 0                     | 30.4                | 0.08707645 | 2.86E-233 | 45.4                | 0.00348123 | 2.18E-150 |
| 0.5                 | 0.66113227 | 0        | 15.5                | 0.8386521  | 0                     | 30.5                | 0.068663   | 8.34E-231 | 45.5                | 0.00338034 | 7.04E-150 |
| 0.6                 | 0.66113227 | 0        | 15.6                | 0.8386521  | 0                     | 30.6                | 0.05576323 | 3.81E-230 | 45.6                | 0.00312095 | 1.13E-149 |
| 0.7                 | 0.66113227 | 0        | 15.7                | 0.8386521  | 0                     | 30.7                | 0.05576323 | 3.81E-230 | 45.7                | 0.00294005 | 1.88E-149 |
| 0.8                 | 0.66113227 | 0        | 15.8                | 0.8386521  | 0                     | 30.8                | 0.05576323 | 3.81E-230 | 45.8                | 0.0027887  | 2.12E-149 |
| 0.9                 | 0.66113227 | 0        | 15.9                | 0.8386521  | 0                     | 30.9                | 0.05027226 | 1.82E-229 | 45.9                | 0.00269431 | 2.07E-148 |
| 1                   | 0.66113227 | 0        | 16                  | 0.8386521  | 0                     | 31                  | 0.05450039 | 5.53E-227 | 46                  | 0.00236724 | 7.23E-148 |
| 1.1                 | 0.66113227 | 0        | 16.1                | 0.8386521  | 0                     | 31.1                | 0.05652024 | 2.79E-225 | 46.1                | 0.00236724 | 7.23E-148 |
| 1.2                 | 0.66113227 | 0        | 16.2                | 0.8386521  | 0                     | 31.2                | 0.05322837 | 3.31E-225 | 46.2                | 0.00239246 | 8.19E-148 |
| 1.3                 | 0.66113227 | 0        | 16.3                | 0.8386521  | 0                     | 31.3                | 0.04853862 | 1.22E-224 | 46.3                | 0.00252694 | 2.37E-147 |
| 1.4                 | 0.66113227 | 0        | 16.4                | 0.8386521  | 0                     | 31.4                | 0.04853862 | 1.22E-224 | 46.4                | 0.00245621 | 2.78E-147 |
| 1.5                 | 0.66113227 | 0        | 16.5                | 0.8386521  | 0                     | 31.5                | 0.04501309 | 2.78E-222 | 46.5                | 0.00230989 | 4.34E-147 |
| 1.6                 | 0.66113227 | 0        | 16.6                | 0.91835194 | 0                     | 31.6                | 0.04501309 | 2.78E-222 | 46.6                | 0.0021176  | 1.85E-146 |
| 1.7                 | 0.66113227 | 0        | 16.7                | 0.91835194 | 0                     | 31.7                | 0.04096038 | 1.25E-221 | 46.7                | 0.0021176  | 1.85E-146 |
| 1.8                 | 0.66113227 | 0        | 16.8                | 0.91835194 | 0                     | 31.8                | 0.04704289 | 4.40E-220 | 46.8                | 0.00183744 | 1.73E-146 |
| 1.9                 | 0.66113227 | 0        | 16.9                | 0.91835194 | 0                     | 31.9                | 0.04961592 | 3.11E-219 | 46.9                | 0.0018286  | 5.80E-146 |
| 2                   | 0.66113227 | 0        | 17                  | 0.91835194 | 0                     | 32                  | 0.04709257 | 9.78E-218 | 47                  | 0.00178431 | 8.91E-146 |
| 2.1                 | 0.66113227 | 0        | 17.1                | 0.98223293 | 0                     | 32.1                | 0.04184677 | 4.26E-217 | 47.1                | 0.00172014 | 4.45E-145 |
| 2.2                 | 0.66113227 | 0        | 17.2                | 0.98223293 | 0                     | 32.2                | 0.04184677 | 4.26E-217 | 47.2                | 0.00162711 | 4.46E-145 |
| 2.3                 | 0.66113227 | 0        | 17.3                | 0.98223293 | 0                     | 32.3                | 0.04184677 | 4.26E-217 | 47.3                | 0.00162711 | 4.46E-145 |
| 2.4                 | 0.66113227 | 0        | 17.4                | 0.98223293 | 0                     | 32.4                | 0.03986155 | 5.28E-215 | 47.4                | 0.00158983 | 6.45E-145 |
| 2.5                 | 0.66113227 | 0        | 17.5                | 0.98223293 | 0                     | 32.5                | 0.03965965 | 1.50E-213 | 47.5                | 0.00171623 | 1.76E-144 |
| 2.6                 | 0.66113227 | 0        | 17.6                | 0.98223293 | 0                     | 32.6                | 0.03548413 | 6.78E-213 | 47.6                | 0.00172447 | 4.62E-144 |
| 2.7                 | 0.66113227 | 0        | 17.7                | 0.98223293 | 0                     | 32.7                | 0.03548413 | 6.78E-213 | 47.7                | 0.00149721 | 8.06E-144 |
| 2.8                 | 0.66113227 | 0        | 17.8                | 0.98223293 | 0                     | 32.8                | 0.03317775 | 9.29E-211 | 47.8                | 0.00148543 | 2.34E-143 |
| 2.9                 | 0.66113227 | 0        | 17.9                | 0.98223293 | 0                     | 32.9                | 0.03317775 | 9.29E-211 | 47.9                | 0.00147256 | 4.07E-143 |
| 3                   | 0.66113227 | 0        | 18                  | 0.57909848 | 0                     | 33                  | 0.03104126 | 3.14E-210 | 48                  | 0.00166011 | 2.77E-142 |
| 3.1                 | 0.66113227 | 0        | 18.1                | 0.57909848 | 0                     | 33.1                | 0.02908611 | 4.20E-210 | 48.1                | 0.00166011 | 2.77E-142 |
| 3.2                 | 0.66113227 | 0        | 18.2                | 0.57909848 | 0                     | 33.2                | 0.02974887 | 2.26E-209 | 48.2                | 0.00161284 | 3.49E-142 |
| 3.3                 | 0.66113227 | 0        | 18.3                | 0.57909848 | 0                     | 33.3                | 0.02837895 | 3.45E-207 | 48.3                | 0.00161284 | 3.49E-142 |
| 3.4                 | 0.66113227 | 0        | 18.4                | 0.57909848 | 0                     | 33.4                | 0.02735981 | 4.45E-206 | 48.4                | 0.00154778 | 2.21E-142 |
| 3.5                 | 0.66113227 | 0        | 18.5                | 0.56891349 | 0                     | 33.5                | 0.0271156  | 1.96E-205 | 48.5                | 0.00151524 | 3.39E-141 |
| 3.6                 | 0.66113227 | 0        | 18.6                | 0.56891349 | 0                     | 33.6                | 0.0271156  | 1.96E-205 | 48.6                | 0.00151524 | 3.39E-141 |
| 3.7                 | 0.66113227 | 0        | 18.7                | 0.56891349 | 0                     | 33.7                | 0.0271156  | 1.96E-205 | 48.7                | 0.00140043 | 5.63E-141 |
| 3.8                 | 0.66113227 | 0        | 18.8                | 0.56891349 | 0                     | 33.8                | 0.02821221 | 8.99E-205 | 48.8                | 0.00142562 | 6.25E-141 |
| 3.9                 | 0.66113227 | 0        | 18.9                | 0.56891349 | 0                     | 33.9                | 0.0271335  | 1.81E-203 | 48.9                | 0.00137203 | 9.76E-141 |
| 4                   | 0.66113227 | 0        | 19                  | 0.56891349 | 0                     | 34                  | 0.0266394  | 9.13E-202 | 49                  | 0.00117305 | 1.60E-140 |
| 4.1                 | 0.66113227 | 0        | 19.1                | 0.56891349 | 0                     | 34.1                | 0.02355493 | 4.92E-201 | 49.1                | 0.00118665 | 1.58E-140 |
| 4.2                 | 0.66113227 | 0        | 19.2                | 0.56891349 | 0                     | 34.2                | 0.02355493 | 4.92E-201 | 49.2                | 0.00116501 | 2.51E-140 |
| 4.3                 | 0.66113227 | 0        | 19.3                | 0.56891349 | 0                     | 34.3                | 0.0245675  | 2.53E-199 | 49.3                | 0.00121196 | 7.37E-140 |
| 4.4                 | 0.66113227 | 0        | 19.4                | 0.6057749  | 0                     | 34.4                | 0.02486658 | 3.37E-199 | 49.4                | 0.00118783 | 1.01E-139 |
| 4.5                 | 0.66113227 | 0        | 19.5                | 0.6057749  | 0                     | 34.5                | 0.02284937 | 8.19E-198 | 49.5                | 0.00122515 | 9.10E-139 |
| 4.6                 | 0.66113227 | 0        | 19.6                | 0.6057749  | 0                     | 34.6                | 0.02335373 | 1.46E-197 | 49.6                | 0.00118717 | 1.16E-139 |
| 4.7                 | 0.66113227 | 0        | 19.7                | 0.6057749  | 0                     | 34.7                | 0.02371497 | 8.55E-197 | 49.7                | 0.00118717 | 1.16E-139 |
| 4.8                 | 0.66113227 | 0        | 19.8                | 0.6057749  | 0                     | 34.8                | 0.02072974 | 5.90E-196 | 49.8                | 0.00116022 | 1.71E-139 |
| 4.9                 | 0.47344649 | 0        | 19.9                | 0.5572782  | 0                     | 34.9                | 0.02118372 | 2.38E-195 | 49.9                | 0.00130488 | 7.00E-139 |
| 5                   | 0.47344649 | 0        | 20                  | 0.5572782  | 0                     | 35                  | 0.02120724 | 8.19E-195 | 50                  | 0.00122515 | 9.11E-139 |
| 5.1                 | 0.47344649 | 0        | 20.1                | 0.37834702 | 0                     | 35.1                | 0.02151738 | 3.73E-194 | 50.1                | 0.00120177 | 1.36E-138 |
| 5.2                 | 0.47344649 | 0        | 20.2                | 0.37834702 | 0                     | 35.2                | 0.02151738 | 3.73E-194 | 50.2                | 0.00117392 | 1.35E-138 |
| 5.3                 | 0.47344649 | 0        | 20.3                | 0.37834702 | 0                     | 35.3                | 0.02151738 | 3.73E-194 | 50.3                | 0.00117392 | 1.35E-138 |
| 5.4                 | 0.47344649 | 0        | 20.4                | 0.37834702 | 0                     | 35.4                | 0.01954895 | 1.65E-192 | 50.4                | 0.0011417  | 2.21E-138 |
| 5.5                 | 0.47344649 | 0        | 20.5                | 0.37834702 | 0                     | 35.5                | 0.01954895 | 1.65E-192 | 50.5                | 0.00118937 | 9.35E-138 |
| 5.6                 | 0.47344649 | 0        | 20.6                | 0.37834702 | 0                     | 35.6                | 0.02025941 | 7.63E-191 | 50.6                | 0.00102343 | 2.99E-138 |
| 5.7                 | 0.47344649 | 0        | 20.7                | 0.37834702 | 0                     | 35.7                | 0.01968285 | 2.21E-189 | 50.7                | 0.00097358 | 4.10E-138 |
| 5.8                 | 0.47344649 | 0        | 20.8                | 0.37834702 | 0                     | 35.8                | 0.01850176 | 8.68E-189 | 50.8                | 0.00095176 | 4.95E-138 |
| 5.9                 | 0.47344649 | 0        | 20.9                | 0.37834702 | 0                     | 35.9                | 0.01850176 | 8.68E-189 | 50.9                | 0.00093476 | 8.47E-138 |
| 6                   | 0.47344649 | 0        | 21                  | 0.37834702 | 0                     | 36                  | 0.01820742 | 6.45E-188 | 51                  | 0.00090336 | 9.56E-138 |
| 6.1                 | 0.47344649 | 0        | 21.1                | 0.37834702 | 0                     | 36.1                | 0.01755528 | 2.45E-187 | 51.1                | 0.00090786 | 1.70E-137 |
| 6.2                 | 0.47344649 | 0        | 21.2                | 0.38341063 | 0                     | 36.2                | 0.01765051 | 1.23E-186 | 51.2                | 0.00085949 | 1.68E-137 |
| 6.3                 | 0.47344649 | 0        | 21.3                | 0.38341063 | 0                     | 36.3                | 0.01825783 | 4.16E-185 | 51.3                | 0.00085949 | 1.68E-137 |
| 6.4                 | 0.47344649 | 0        | 21.4                | 0.38341063 | 0                     | 36.4                | 0.01684117 | 4.30E-185 | 51.4                | 0.00079603 | 2.99E-137 |
| 6.5                 | 0.47344649 | 0        | 21.5                | 0.38341063 | 0                     | 36.5                | 0.01685711 | 2.00E-184 | 51.5                | 0.00079603 | 2.99E-137 |
| 6.6                 | 0.47344649 | 0        | 21.6                | 0.38341063 | 0                     | 36.6                | 0.01705266 | 9.94E-184 | 51.6                | 0.00079066 | 5.45E-137 |
| 6.7                 | 0.47344649 | 0        | 21.7                | 0.38341063 | 0                     | 36.7                | 0.01752815 | 4.07E-183 | 51.7                | 0.00079066 | 5.45E-137 |
| 6.8                 | 0.47344649 | 0        | 21.8                | 0.36825823 | 0                     | 36.8                | 0.01752815 | 4.07E-183 | 51.8                | 0.00079066 | 5.45E-137 |
| 6.9                 | 0.47344649 | 0        | 21.9                | 0.36825823 | 0                     | 36.9                | 0.01829011 | 1.91E-182 | 51.9                | 0.00080606 | 2.15E-136 |
| 7                   | 0.47344649 | 0        | 22                  | 0.36825823 | 0                     | 37                  | 0.01964651 | 1.16E-181 | 52                  | 0.00088118 | 2.27E-136 |
| 7.1                 | 0.47344649 | 0        | 22.1                | 0.2598351  | 8.33716000000000E-319 | 37.1                | 0.02195751 | 2.76E-180 | 52.1                | 0.0009293  | 2.72E-136 |
| 7.2                 | 0.47344649 | 0        | 22.2                | 0.2598351  | 8.33716000000000E-319 | 37.2                | 0.02142435 | 1.10E-179 | 52.2                | 0.00088824 | 7.38E-136 |
| 7.3                 | 0.47344649 | 0        | 22.3                | 0.2598351  | 8.33716000000000E-319 | 37.3                | 0.02122565 | 2.60E-178 | 52.3                | 0.00091024 | 8.39E-136 |
| 7.4                 | 0.47344649 | 0        | 22.4                | 0.46911225 | 1.91107297463000E-312 | 37.4                | 0.02052779 | 3.08E-178 | 52.4                | 0.00091024 | 8.39E-136 |
| 7.5                 | 0.8386521  | 0        | 22.5                | 0.46911225 | 1.91107297463000E-312 | 37.5                | 0.01882219 | 1.08E-177 | 52.5                | 0.00077753 | 1.45E-135 |
| 7.6                 | 0.8386521  | 0        | 22.6                | 0.46911225 | 1.91107297463000E-312 | 37.6                | 0.01821721 | 6.08E-177 | 52.6                | 0.00074125 | 6.17E-135 |
| 7.7                 | 0.8386521  | 0        | 22.7                | 0.46911225 | 1.91107297463000E-312 | 37.7                | 0.01812121 | 4.08E-177 | 52.7                | 0.00074125 | 6.17E-135 |
| 7.8                 | 0.8386521  | 0        | 22.8                | 0.46911225 | 1.91107297463000E-312 | 37.8                | 0.01974259 | 7.08E-176 | 52.8                | 0.0007548  | 3.11E-135 |
| 7.9                 | 0.8386521  | 0        | 22.9                | 0.46911225 | 1.91107297463000E-312 | 37.9                | 0.01974259 | 7.08E-176 | 52.9                | 0.0006605  | 4.17E-135 |
| 8                   | 0.8386521  | 0        | 23                  | 0.46911225 | 1.91107297463000E-312 | 38                  | 0.01804038 | 8.80E-176 | 53                  | 0.00061754 | 5.14E-135 |
| 8.1                 | 0.8386521  | 0        | 23.1                | 0.46298667 | 1.28E-306             | 38.1                | 0.01746332 | 3.40E-175 | 53.1                | 0.00059834 | 8.92E-135 |
| 8.2                 | 0.8386521  | 0        | 23.2                | 0.46298667 | 1.28E-306             | 38.2                | 0.01806683 | 2.11E-173 | 53.2                | 0.00055234 | 1.01E-134 |
| 8.3                 | 0.8386521  | 0        | 23.3                | 0.33605222 | 2.15E-306             | 38.3                | 0.01710208 | 2.66E-173 | 53.3                | 0.00055234 | 1.01E-134 |
| 8.4                 | 0.8386521  | 0        | 23.4                | 0.46292967 | 1.34E-305             | 38.4                | 0.01594531 | 2.74E-173 | 53.4                | 0.00051629 | 1.52E-134 |
| 8.5                 | 0.8386521  | 0        | 23.5                | 0.46292967 | 1.34E-305             | 38.5                | 0.01425192 | 1.46E-172 | 53.5                | 0.00048733 | 3.09E-134 |
| 8.6                 | 0.8386521  | 0        | 23.6                | 0.47301011 | 1.52E-3               |                     |            |           |                     |            |           |

|      |           |           |      |            |           |      |            |           |       |            |           |
|------|-----------|-----------|------|------------|-----------|------|------------|-----------|-------|------------|-----------|
| 11.9 | 0.8386521 | 0         | 26.9 | 0.33074602 | 2.47E-262 | 41.9 | 0.00667398 | 5.11E-157 | 56.9  | 0.00017404 | 5.45E-129 |
| 12   | 0.8386521 | 0         | 27   | 0.33074602 | 2.47E-262 | 42   | 0.00662117 | 4.96E-157 | 57    | 0.00017404 | 5.45E-129 |
| 12.1 | 0.8386521 | 0         | 27.1 | 0.33074602 | 2.47E-262 | 42.1 | 0.00667914 | 1.72E-156 | 57.1  | 0.00017699 | 1.77E-128 |
| 12.2 | 0.8386521 | 0         | 27.2 | 0.33074602 | 2.47E-262 | 42.2 | 0.00727937 | 5.43E-156 | 57.2  | 0.00019533 | 3.65E-128 |
| 12.3 | 0.8386521 | 0         | 27.3 | 0.28380657 | 3.32E-262 | 42.3 | 0.00722642 | 8.06E-156 | 57.3  | 0.00018934 | 4.62E-128 |
| 12.4 | 0.8386521 | 0         | 27.4 | 0.27194875 | 2.66E-259 | 42.4 | 0.00644501 | 1.00E-155 | 57.4  | 0.00019056 | 1.07E-127 |
| 12.5 | 0.8386521 | 0         | 27.5 | 0.22024368 | 4.27E-259 | 42.5 | 0.00582075 | 8.35E-156 | 57.5  | 0.00018225 | 1.25E-127 |
| 12.6 | 0.8386521 | 0         | 27.6 | 0.18249516 | 2.15E-256 | 42.6 | 0.00582076 | 8.35E-156 | 57.6  | 0.00016683 | 1.41E-127 |
| 12.7 | 0.8386521 | 0         | 27.7 | 0.18249516 | 2.15E-256 | 42.7 | 0.00622553 | 2.59E-155 | 57.7  | 0.00017034 | 2.99E-127 |
| 12.8 | 0.8386521 | 0         | 27.8 | 0.16558547 | 3.32E-256 | 42.8 | 0.00602393 | 2.68E-155 | 57.8  | 0.00017175 | 3.41E-127 |
| 12.9 | 0.8386521 | 0         | 27.9 | 0.16558547 | 3.32E-256 | 42.9 | 0.00573963 | 2.70E-155 | 57.9  | 0.00015576 | 6.03E-127 |
| 13   | 0.8386521 | 0         | 28   | 0.13481747 | 4.36E-253 | 43   | 0.00557546 | 1.04E-154 | 58    | 0.000157   | 9.88E-127 |
| 13.1 | 0.8386521 | 0         | 28.1 | 0.12525214 | 9.66E-253 | 43.1 | 0.00543526 | 3.83E-154 | 58.1  | 0.00014056 | 9.10E-127 |
| 13.2 | 0.8386521 | 0         | 28.2 | 0.12617082 | 2.39E-250 | 43.2 | 0.00557538 | 5.58E-154 | 58.2  | 0.00012526 | 1.16E-126 |
| 13.3 | 0.8386521 | 0         | 28.3 | 0.11220587 | 5.80E-250 | 43.3 | 0.00549696 | 6.01E-154 | 58.3  | 0.0001261  | 2.24E-126 |
| 13.4 | 0.8386521 | 0         | 28.4 | 0.11220587 | 5.80E-250 | 43.4 | 0.00586645 | 1.94E-153 | 58.4  | 0.00012655 | 7.28E-126 |
| 13.5 | 0.8386521 | 0         | 28.5 | 0.10850232 | 1.93E-247 | 43.5 | 0.00586645 | 1.94E-153 | 58.5  | 0.00012655 | 7.28E-126 |
| 13.6 | 0.8386521 | 0         | 28.6 | 0.10850232 | 1.93E-247 | 43.6 | 0.00534837 | 1.12E-153 | 58.6  | 0.00013039 | 1.54E-125 |
| 13.7 | 0.8386521 | 0         | 28.7 | 0.10859419 | 8.73E-247 | 43.7 | 0.00541953 | 8.17E-153 | 58.7  | 0.00012913 | 3.01E-125 |
| 13.8 | 0.8386521 | 0         | 28.8 | 0.10859419 | 8.73E-247 | 43.8 | 0.00544752 | 2.88E-152 | 58.8  | 0.00012139 | 2.72E-125 |
| 13.9 | 0.8386521 | 0         | 28.9 | 0.10859419 | 8.73E-247 | 43.9 | 0.00544752 | 2.88E-152 | 58.9  | 0.00011886 | 3.06E-125 |
| 14   | 0.8386521 | 0         | 29   | 0.11567278 | 2.49E-244 | 44   | 0.00501418 | 2.78E-152 | 59    | 0.00011328 | 3.60E-125 |
| 14.1 | 0.8386521 | 0         | 29.1 | 0.1200439  | 9.20E-242 | 44.1 | 0.00475609 | 3.78E-152 | 59.1  | 0.00011286 | 9.73E-125 |
| 14.2 | 0.8386521 | 0         | 29.2 | 0.09815682 | 2.98E-241 | 44.2 | 0.00461997 | 1.61E-151 | 59.2  | 0.00011286 | 9.73E-125 |
| 14.3 | 0.8386521 | 0         | 29.3 | 0.09815682 | 2.98E-241 | 44.3 | 0.00406188 | 1.57E-151 | 59.3  | 9.97E-05   | 1.12E-124 |
| 14.4 | 0.8386521 | 0         | 29.4 | 0.09815682 | 2.98E-241 | 44.4 | 0.00397814 | 2.20E-151 | 59.4  | 0.00010882 | 1.50E-124 |
| 14.5 | 0.8386521 | 0         | 29.5 | 0.09815682 | 2.98E-241 | 44.5 | 0.00397814 | 2.20E-151 | 59.5  | 0.00010322 | 1.93E-124 |
| 14.6 | 0.8386521 | 0         | 29.6 | 0.09815682 | 2.98E-241 | 44.6 | 0.00397814 | 2.20E-151 | 59.6  | 9.53E-05   | 1.89E-124 |
| 14.7 | 0.8386521 | 0         | 29.7 | 0.08960128 | 1.60E-238 | 44.7 | 0.00427065 | 3.11E-151 | 59.7  | 9.85E-05   | 4.30E-124 |
| 14.8 | 0.8386521 | 0         | 29.8 | 0.07766891 | 7.52E-238 | 44.8 | 0.00426619 | 9.53E-151 | 59.8  | 8.98E-05   | 4.65E-124 |
| 14.9 | 0.8386521 | 0         | 29.9 | 0.08921983 | 1.06E-235 | 44.9 | 0.00398459 | 9.67E-151 | 59.9  | 8.88E-05   | 7.50E-124 |
| 60   | 8.88E-05  | 7.50E-124 | 75   | 5.18E-07   | 2.09E-98  | 90   | 1.95E-07   | 1.76E-66  | 105   | 1.73E-08   | 2.53E-61  |
| 60.1 | 8.88E-05  | 7.50E-124 | 75.1 | 4.77E-07   | 4.49E-98  | 90.1 | 1.95E-07   | 1.76E-66  | 105.1 | 1.73E-08   | 2.53E-61  |
| 60.2 | 8.41E-05  | 7.58E-124 | 75.2 | 5.28E-07   | 9.32E-98  | 90.2 | 1.90E-07   | 2.24E-66  | 105.2 | 1.70E-08   | 2.52E-61  |
| 60.3 | 8.41E-05  | 7.58E-124 | 75.3 | 4.84E-07   | 1.66E-97  | 90.3 | 1.95E-07   | 3.03E-66  | 105.3 | 1.66E-08   | 2.68E-61  |
| 60.4 | 8.58E-05  | 1.15E-123 | 75.4 | 4.34E-07   | 3.18E-97  | 90.4 | 1.90E-07   | 3.09E-66  | 105.4 | 1.62E-08   | 2.69E-61  |
| 60.5 | 7.35E-05  | 1.27E-123 | 75.5 | 4.21E-07   | 6.31E-97  | 90.5 | 1.94E-07   | 3.84E-65  | 105.5 | 1.61E-08   | 3.01E-61  |
| 60.6 | 6.72E-05  | 1.48E-123 | 75.6 | 3.59E-07   | 1.45E-96  | 90.6 | 1.87E-07   | 4.51E-66  | 105.6 | 1.61E-08   | 3.01E-61  |
| 60.7 | 6.22E-05  | 1.67E-123 | 75.7 | 3.29E-07   | 2.44E-96  | 90.7 | 1.84E-07   | 5.54E-66  | 105.7 | 1.53E-08   | 3.04E-61  |
| 60.8 | 5.93E-05  | 2.55E-123 | 75.8 | 3.36E-07   | 3.09E-96  | 90.8 | 1.89E-07   | 6.57E-66  | 105.8 | 1.61E-08   | 3.83E-61  |
| 60.9 | 6.00E-05  | 3.28E-123 | 75.9 | 3.18E-07   | 7.50E-96  | 90.9 | 1.95E-07   | 1.02E-65  | 105.9 | 1.61E-08   | 3.83E-61  |
| 61   | 5.60E-05  | 3.95E-123 | 76   | 2.93E-07   | 9.98E-96  | 91   | 1.95E-07   | 1.02E-65  | 106   | 1.61E-08   | 3.83E-61  |
| 61.1 | 5.38E-05  | 4.46E-123 | 76.1 | 2.75E-07   | 1.33E-95  | 91.1 | 2.01E-07   | 1.37E-65  | 106.1 | 1.55E-08   | 3.95E-61  |
| 61.2 | 5.17E-05  | 8.02E-123 | 76.2 | 2.65E-07   | 1.93E-95  | 91.2 | 1.97E-07   | 2.25E-65  | 106.2 | 1.55E-08   | 3.95E-61  |
| 61.3 | 5.17E-05  | 8.02E-123 | 76.3 | 2.73E-07   | 3.15E-95  | 91.3 | 1.94E-07   | 2.33E-65  | 106.3 | 1.56E-08   | 4.10E-61  |
| 61.4 | 4.96E-05  | 7.80E-123 | 76.4 | 2.90E-07   | 7.51E-95  | 91.4 | 1.94E-07   | 2.33E-65  | 106.4 | 1.57E-08   | 4.27E-61  |
| 61.5 | 4.91E-05  | 9.52E-123 | 76.5 | 2.81E-07   | 1.28E-94  | 91.5 | 1.88E-07   | 3.49E-65  | 106.5 | 1.52E-08   | 4.30E-61  |
| 61.6 | 4.60E-05  | 9.95E-123 | 76.6 | 2.66E-07   | 1.74E-94  | 91.6 | 1.85E-07   | 3.49E-65  | 106.6 | 1.51E-08   | 4.23E-61  |
| 61.7 | 4.40E-05  | 1.17E-122 | 76.7 | 2.80E-07   | 4.96E-94  | 91.7 | 1.80E-07   | 5.21E-65  | 106.7 | 1.49E-08   | 4.52E-61  |
| 61.8 | 4.02E-05  | 1.59E-122 | 76.8 | 2.64E-07   | 6.25E-94  | 91.8 | 1.82E-07   | 5.98E-65  | 106.8 | 1.49E-08   | 4.52E-61  |
| 61.9 | 4.05E-05  | 2.34E-122 | 76.9 | 2.76E-07   | 7.96E-94  | 91.9 | 1.82E-07   | 7.30E-65  | 106.9 | 1.49E-08   | 4.55E-61  |
| 62   | 3.29E-05  | 3.06E-122 | 77   | 2.66E-07   | 1.74E-93  | 92   | 1.80E-07   | 7.47E-65  | 107   | 1.40E-08   | 4.59E-61  |
| 62.1 | 3.51E-05  | 4.25E-122 | 77.1 | 2.50E-07   | 2.12E-93  | 92.1 | 1.77E-07   | 8.51E-65  | 107.1 | 1.39E-08   | 4.60E-61  |
| 62.2 | 3.59E-05  | 5.48E-122 | 77.2 | 2.20E-07   | 2.99E-93  | 92.2 | 1.66E-07   | 1.06E-64  | 107.2 | 1.37E-08   | 5.05E-61  |
| 62.3 | 3.68E-05  | 6.90E-122 | 77.3 | 2.05E-07   | 6.81E-93  | 92.3 | 1.63E-07   | 1.10E-64  | 107.3 | 1.33E-08   | 5.45E-61  |
| 62.4 | 3.68E-05  | 6.90E-122 | 77.4 | 2.03E-07   | 8.91E-93  | 92.4 | 1.60E-07   | 1.18E-64  | 107.4 | 1.31E-08   | 5.57E-61  |
| 62.5 | 3.78E-05  | 1.06E-121 | 77.5 | 2.21E-07   | 2.33E-92  | 92.5 | 1.58E-07   | 1.25E-64  | 107.5 | 1.38E-08   | 5.84E-61  |
| 62.6 | 3.61E-05  | 1.39E-121 | 77.6 | 2.21E-07   | 2.80E-92  | 92.6 | 1.58E-07   | 1.25E-64  | 107.6 | 1.38E-08   | 5.84E-61  |
| 62.7 | 3.26E-05  | 1.78E-121 | 77.7 | 2.13E-07   | 7.71E-92  | 92.7 | 1.55E-07   | 1.43E-64  | 107.7 | 1.38E-08   | 5.84E-61  |
| 62.8 | 3.15E-05  | 2.67E-121 | 77.8 | 2.21E-07   | 2.25E-91  | 92.8 | 1.57E-07   | 1.65E-64  | 107.8 | 1.29E-08   | 6.10E-61  |
| 62.9 | 3.25E-05  | 4.20E-121 | 77.9 | 2.05E-07   | 2.63E-91  | 92.9 | 1.57E-07   | 1.63E-64  | 107.9 | 1.31E-08   | 6.72E-61  |
| 63   | 2.95E-05  | 4.11E-121 | 78   | 2.15E-07   | 6.75E-91  | 93   | 1.57E-07   | 1.71E-64  | 108   | 1.26E-08   | 6.53E-61  |
| 63.1 | 2.81E-05  | 4.95E-121 | 78.1 | 2.07E-07   | 1.31E-90  | 93.1 | 1.50E-07   | 1.67E-64  | 108.1 | 1.23E-08   | 6.76E-61  |
| 63.2 | 2.65E-05  | 6.18E-121 | 78.2 | 2.32E-07   | 1.94E-90  | 93.2 | 1.48E-07   | 1.71E-64  | 108.2 | 1.23E-08   | 7.99E-61  |
| 63.3 | 2.56E-05  | 7.92E-121 | 78.3 | 2.27E-07   | 8.96E-90  | 93.3 | 1.40E-07   | 2.06E-64  | 108.3 | 1.23E-08   | 6.56E-61  |
| 63.4 | 2.53E-05  | 1.18E-120 | 78.4 | 2.20E-07   | 1.14E-89  | 93.4 | 1.31E-07   | 2.09E-64  | 108.4 | 1.20E-08   | 8.70E-61  |
| 63.5 | 2.57E-05  | 1.56E-120 | 78.5 | 2.06E-07   | 1.45E-89  | 93.5 | 1.30E-07   | 2.18E-64  | 108.5 | 1.20E-08   | 8.70E-61  |
| 63.6 | 2.02E-05  | 2.25E-120 | 78.6 | 2.29E-07   | 5.92E-89  | 93.6 | 1.27E-07   | 2.98E-64  | 108.6 | 1.22E-08   | 9.12E-61  |
| 63.7 | 2.02E-05  | 2.25E-120 | 78.7 | 2.32E-07   | 8.63E-89  | 93.7 | 1.24E-07   | 3.06E-64  | 108.7 | 1.23E-08   | 9.39E-61  |
| 63.8 | 2.02E-05  | 2.25E-120 | 78.8 | 2.17E-07   | 1.45E-88  | 93.8 | 1.24E-07   | 3.06E-64  | 108.8 | 1.18E-08   | 9.63E-61  |
| 63.9 | 2.01E-05  | 3.67E-120 | 78.9 | 2.20E-07   | 2.11E-88  | 93.9 | 1.21E-07   | 3.58E-64  | 108.9 | 1.19E-08   | 1.10E-60  |
| 64   | 1.77E-05  | 2.33E-120 | 79   | 2.14E-07   | 4.77E-88  | 94   | 1.21E-07   | 3.74E-64  | 109   | 1.14E-08   | 1.09E-60  |
| 64.1 | 1.64E-05  | 3.14E-120 | 79.1 | 2.01E-07   | 1.14E-87  | 94.1 | 1.15E-07   | 3.81E-64  | 109.1 | 1.14E-08   | 1.09E-60  |
| 64.2 | 1.62E-05  | 3.28E-120 | 79.2 | 2.07E-07   | 2.02E-87  | 94.2 | 1.09E-07   | 4.42E-64  | 109.2 | 1.12E-08   | 1.09E-60  |
| 64.3 | 1.60E-05  | 4.18E-120 | 79.3 | 2.08E-07   | 3.32E-87  | 94.3 | 1.07E-07   | 4.54E-64  | 109.3 | 1.11E-08   | 1.17E-60  |
| 64.4 | 1.40E-05  | 5.65E-120 | 79.4 | 2.05E-07   | 5.71E-87  | 94.4 | 1.01E-07   | 5.32E-64  | 109.4 | 1.07E-08   | 1.17E-60  |
| 64.5 | 1.34E-05  | 8.91E-120 | 79.5 | 2.11E-07   | 9.23E-87  | 94.5 | 1.02E-07   | 6.24E-64  | 109.5 | 1.07E-08   | 1.17E-60  |
| 64.6 | 1.44E-05  | 1.25E-119 | 79.6 | 2.09E-07   | 1.87E-86  | 94.6 | 9.88E-08   | 7.21E-64  | 109.6 | 1.07E-08   | 1.17E-60  |
| 64.7 | 1.30E-05  | 1.52E-119 | 79.7 | 1.98E-07   | 3.29E-86  | 94.7 | 9.85E-08   | 8.57E-64  | 109.7 | 1.04E-08   | 1.17E-60  |
| 64.8 | 1.47E-05  | 3.64E-119 | 79.8 | 2.15E-07   | 3.48E-86  | 94.8 | 1.46E-07   | 1.04E-63  | 109.8 | 9.99E-09   | 1.17E-60  |
| 64.9 | 1.45E-05  | 4.01E-119 | 79.9 | 2.27E-07   | 1.59E-85  | 94.9 | 9.37E-08   | 9.51E-64  | 109.9 | 9.99E-09   | 1.18E-60  |
| 65   | 1.40E-05  | 6.89E-119 | 80   | 2.26E-07   | 3.30E-85  | 95   | 9.47E-08   | 9.97E-64  | 110   | 9.99E-09   | 1.18E-60  |
| 65.1 | 1.33E-05  | 9.59E-119 | 80.1 | 2.39E-07   | 7.58E-85  | 95.1 | 9.31E-08   | 1.16E-63  | 110.1 | 9.88E-09   | 1.22E-60  |
| 65.2 | 1.18E-05  | 1.12E-118 | 80.2 | 2.36E-07   | 1.09E-84  | 95.2 | 8.98E-08   | 1.24E-63  | 110.2 | 9.88E-09   | 1.22E-60  |
| 65.3 | 1.15E-05  | 2.44E-118 | 80.3 | 2.         |           |      |            |           |       |            |           |

|       |          |           |       |          |          |       |          |          |       |          |          |
|-------|----------|-----------|-------|----------|----------|-------|----------|----------|-------|----------|----------|
| 69    | 1.22E-06 | 7.13E-112 | 84    | 2.77E-07 | 5.66E-74 | 99    | 4.76E-08 | 2.46E-62 | 114   | 6.45E-09 | 3.53E-60 |
| 69.1  | 1.19E-06 | 1.25E-111 | 84.1  | 2.69E-07 | 7.28E-74 | 99.1  | 4.70E-08 | 2.68E-62 | 114.1 | 6.17E-09 | 3.81E-60 |
| 69.2  | 1.18E-06 | 1.53E-111 | 84.2  | 2.93E-07 | 1.67E-73 | 99.2  | 4.67E-08 | 2.82E-62 | 114.2 | 6.13E-09 | 3.62E-60 |
| 69.3  | 1.19E-06 | 5.78E-111 | 84.3  | 2.91E-07 | 2.71E-73 | 99.3  | 4.49E-08 | 2.80E-62 | 114.3 | 6.21E-09 | 3.91E-60 |
| 69.4  | 1.18E-06 | 1.08E-110 | 84.4  | 2.99E-07 | 3.63E-73 | 99.4  | 4.41E-08 | 3.21E-62 | 114.4 | 6.21E-09 | 3.91E-60 |
| 69.5  | 1.18E-06 | 1.08E-110 | 84.5  | 3.11E-07 | 6.32E-73 | 99.5  | 4.41E-08 | 3.21E-62 | 114.5 | 5.94E-09 | 3.78E-60 |
| 69.6  | 1.15E-06 | 1.52E-110 | 84.6  | 2.85E-07 | 9.91E-73 | 99.6  | 4.41E-08 | 3.21E-62 | 114.6 | 5.83E-09 | 4.15E-60 |
| 69.7  | 8.98E-07 | 3.23E-110 | 84.7  | 2.84E-07 | 1.14E-72 | 99.7  | 3.91E-08 | 3.19E-62 | 114.7 | 5.93E-09 | 4.87E-60 |
| 69.8  | 8.97E-07 | 5.39E-110 | 84.8  | 2.76E-07 | 1.27E-72 | 99.8  | 3.83E-08 | 3.36E-62 | 114.8 | 5.73E-09 | 4.91E-60 |
| 69.9  | 8.78E-07 | 6.87E-110 | 84.9  | 2.76E-07 | 1.27E-72 | 99.9  | 3.83E-08 | 3.36E-62 | 114.9 | 5.56E-09 | 5.00E-60 |
| 70    | 8.73E-07 | 1.26E-109 | 85    | 2.52E-07 | 2.29E-72 | 100   | 3.90E-08 | 3.46E-62 | 115   | 5.27E-09 | 5.19E-60 |
| 70.1  | 1.04E-06 | 4.82E-109 | 85.1  | 2.43E-07 | 4.21E-72 | 100.1 | 3.90E-08 | 3.57E-62 | 115.1 | 5.26E-09 | 5.36E-60 |
| 70.2  | 1.04E-06 | 4.82E-109 | 85.2  | 2.38E-07 | 6.80E-72 | 100.2 | 3.90E-08 | 3.57E-62 | 115.2 | 5.09E-09 | 5.45E-60 |
| 70.3  | 1.01E-06 | 7.04E-109 | 85.3  | 2.42E-07 | 7.81E-72 | 100.3 | 3.86E-08 | 3.58E-62 | 115.3 | 4.98E-09 | 5.56E-60 |
| 70.4  | 9.18E-07 | 8.73E-109 | 85.4  | 2.34E-07 | 1.17E-71 | 100.4 | 3.59E-08 | 3.63E-62 | 115.4 | 4.98E-09 | 5.56E-60 |
| 70.5  | 9.18E-07 | 1.55E-108 | 85.5  | 2.24E-07 | 1.29E-71 | 100.5 | 3.59E-08 | 3.63E-62 | 115.5 | 4.93E-09 | 6.21E-60 |
| 70.6  | 8.95E-07 | 3.35E-108 | 85.6  | 2.17E-07 | 2.21E-71 | 100.6 | 3.47E-08 | 3.74E-62 | 115.6 | 4.93E-09 | 6.21E-60 |
| 70.7  | 8.40E-07 | 5.31E-108 | 85.7  | 2.15E-07 | 2.69E-71 | 100.7 | 3.47E-08 | 3.74E-62 | 115.7 | 4.93E-09 | 6.21E-60 |
| 70.8  | 8.78E-07 | 7.11E-108 | 85.8  | 2.07E-07 | 3.57E-71 | 100.8 | 3.47E-08 | 3.74E-62 | 115.8 | 4.95E-09 | 6.41E-60 |
| 70.9  | 8.23E-07 | 9.37E-108 | 85.9  | 2.17E-07 | 5.27E-71 | 100.9 | 3.47E-08 | 3.74E-62 | 115.9 | 4.75E-09 | 6.32E-60 |
| 71    | 7.78E-07 | 1.69E-107 | 86    | 2.24E-07 | 6.48E-71 | 101   | 3.40E-08 | 3.73E-62 | 116   | 4.61E-09 | 6.58E-60 |
| 71.1  | 8.12E-07 | 3.03E-107 | 86.1  | 2.30E-07 | 1.40E-70 | 101.1 | 3.19E-08 | 3.45E-62 | 116.1 | 4.61E-09 | 6.58E-60 |
| 71.2  | 7.90E-07 | 4.82E-107 | 86.2  | 2.24E-07 | 1.52E-70 | 101.2 | 3.19E-08 | 3.45E-62 | 116.2 | 4.61E-09 | 6.22E-60 |
| 71.3  | 7.99E-07 | 7.31E-107 | 86.3  | 2.37E-07 | 3.24E-70 | 101.3 | 3.08E-08 | 3.67E-62 | 116.3 | 4.23E-09 | 6.69E-60 |
| 71.4  | 8.26E-07 | 3.22E-106 | 86.4  | 2.17E-07 | 3.50E-70 | 101.4 | 3.08E-08 | 3.67E-62 | 116.4 | 4.23E-09 | 6.69E-60 |
| 71.5  | 7.76E-07 | 4.59E-106 | 86.5  | 2.38E-07 | 5.24E-70 | 101.5 | 3.00E-08 | 3.66E-62 | 116.5 | 4.10E-09 | 6.77E-60 |
| 71.6  | 7.15E-07 | 6.38E-106 | 86.6  | 2.36E-07 | 8.98E-70 | 101.6 | 2.88E-08 | 3.76E-62 | 116.6 | 3.84E-09 | 6.79E-60 |
| 71.7  | 7.12E-07 | 8.09E-106 | 86.7  | 2.45E-07 | 1.20E-69 | 101.7 | 2.73E-08 | 3.84E-62 | 116.7 | 3.84E-09 | 6.79E-60 |
| 71.8  | 7.05E-07 | 9.74E-106 | 86.8  | 2.48E-07 | 1.50E-69 | 101.8 | 2.73E-08 | 4.23E-62 | 116.8 | 3.84E-09 | 6.79E-60 |
| 71.9  | 7.05E-07 | 9.74E-106 | 86.9  | 2.36E-07 | 1.97E-69 | 101.9 | 2.73E-08 | 4.28E-62 | 116.9 | 3.84E-09 | 6.79E-60 |
| 72    | 7.02E-07 | 1.46E-105 | 87    | 2.44E-07 | 2.55E-69 | 102   | 2.73E-08 | 4.28E-62 | 117   | 3.78E-09 | 7.06E-60 |
| 72.1  | 6.60E-07 | 1.95E-105 | 87.1  | 2.53E-07 | 4.46E-69 | 102.1 | 2.62E-08 | 5.46E-62 | 117.1 | 3.71E-09 | 7.38E-60 |
| 72.2  | 6.24E-07 | 3.20E-105 | 87.2  | 2.54E-07 | 5.64E-69 | 102.2 | 2.45E-08 | 6.60E-62 | 117.2 | 3.46E-09 | 7.66E-60 |
| 72.3  | 6.09E-07 | 1.38E-104 | 87.3  | 2.65E-07 | 8.15E-69 | 102.3 | 2.70E-08 | 8.05E-62 | 117.3 | 3.63E-09 | 7.22E-60 |
| 72.4  | 5.80E-07 | 1.64E-104 | 87.4  | 2.57E-07 | 8.34E-69 | 102.4 | 2.60E-08 | 7.94E-62 | 117.4 | 3.63E-09 | 7.22E-60 |
| 72.5  | 6.85E-07 | 4.65E-104 | 87.5  | 2.55E-07 | 1.08E-68 | 102.5 | 2.49E-08 | 8.70E-62 | 117.5 | 3.51E-09 | 7.61E-60 |
| 72.6  | 6.62E-07 | 6.65E-104 | 87.6  | 2.69E-07 | 1.67E-68 | 102.6 | 2.49E-08 | 8.70E-62 | 117.6 | 3.46E-09 | 7.66E-60 |
| 72.7  | 5.90E-07 | 1.20E-103 | 87.7  | 2.65E-07 | 1.94E-68 | 102.7 | 2.49E-08 | 8.70E-62 | 117.7 | 3.46E-09 | 7.66E-60 |
| 72.8  | 5.95E-07 | 1.98E-103 | 87.8  | 2.75E-07 | 3.12E-68 | 102.8 | 2.41E-08 | 9.13E-62 | 117.8 | 3.46E-09 | 8.43E-60 |
| 72.9  | 5.64E-07 | 2.97E-103 | 87.9  | 2.75E-07 | 3.12E-68 | 102.9 | 2.41E-08 | 9.13E-62 | 117.9 | 3.46E-09 | 8.43E-60 |
| 73    | 5.55E-07 | 5.69E-103 | 88    | 2.97E-07 | 4.64E-68 | 103   | 2.45E-08 | 9.67E-62 | 118   | 3.28E-09 | 9.86E-60 |
| 73.1  | 6.20E-07 | 1.00E-102 | 88.1  | 3.10E-07 | 6.50E-68 | 103.1 | 2.40E-08 | 9.91E-62 | 118.1 | 3.28E-09 | 9.86E-60 |
| 73.2  | 6.21E-07 | 1.45E-102 | 88.2  | 3.04E-07 | 8.49E-68 | 103.2 | 2.40E-08 | 1.07E-61 | 118.2 | 3.28E-09 | 9.86E-60 |
| 73.3  | 6.61E-07 | 4.08E-102 | 88.3  | 3.09E-07 | 1.15E-67 | 103.3 | 2.33E-08 | 1.04E-61 | 118.3 | 3.19E-09 | 1.04E-59 |
| 73.4  | 6.38E-07 | 6.96E-102 | 88.4  | 3.06E-07 | 1.14E-67 | 103.4 | 2.38E-08 | 1.07E-61 | 118.4 | 3.19E-09 | 1.04E-59 |
| 73.5  | 6.25E-07 | 1.25E-101 | 88.5  | 2.83E-07 | 1.34E-67 | 103.5 | 2.36E-08 | 1.18E-61 | 118.5 | 3.13E-09 | 1.12E-59 |
| 73.6  | 6.11E-07 | 1.88E-101 | 88.6  | 2.88E-07 | 1.59E-67 | 103.6 | 2.36E-08 | 1.18E-61 | 118.6 | 3.01E-09 | 1.16E-59 |
| 73.7  | 6.09E-07 | 3.76E-101 | 88.7  | 2.86E-07 | 2.06E-67 | 103.7 | 2.29E-08 | 1.26E-61 | 118.7 | 3.01E-09 | 1.16E-59 |
| 73.8  | 5.89E-07 | 5.56E-101 | 88.8  | 2.86E-07 | 2.06E-67 | 103.8 | 2.36E-08 | 1.18E-61 | 118.8 | 2.83E-09 | 1.24E-59 |
| 73.9  | 5.50E-07 | 8.45E-101 | 88.9  | 2.81E-07 | 2.34E-67 | 103.9 | 2.38E-08 | 2.01E-61 | 118.9 | 2.88E-09 | 1.18E-59 |
| 74    | 5.45E-07 | 1.16E-100 | 89    | 2.58E-07 | 2.68E-67 | 104   | 2.38E-08 | 2.01E-61 | 119   | 2.83E-09 | 1.15E-59 |
| 74.1  | 5.68E-07 | 2.20E-100 | 89.1  | 2.50E-07 | 2.94E-67 | 104.1 | 2.19E-08 | 2.15E-61 | 119.1 | 2.78E-09 | 1.19E-59 |
| 74.2  | 5.10E-07 | 4.07E-100 | 89.2  | 2.50E-07 | 2.94E-67 | 104.2 | 2.15E-08 | 2.24E-61 | 119.2 | 2.74E-09 | 1.29E-59 |
| 74.3  | 5.74E-07 | 1.23E-99  | 89.3  | 2.40E-07 | 3.79E-67 | 104.3 | 2.07E-08 | 2.24E-61 | 119.3 | 2.74E-09 | 1.29E-59 |
| 74.4  | 5.49E-07 | 1.48E-99  | 89.4  | 2.34E-07 | 4.73E-67 | 104.4 | 2.07E-08 | 2.24E-61 | 119.4 | 2.61E-09 | 1.32E-59 |
| 74.5  | 5.59E-07 | 2.49E-99  | 89.5  | 2.25E-07 | 5.21E-67 | 104.5 | 2.07E-08 | 2.24E-61 | 119.5 | 2.62E-09 | 1.38E-59 |
| 74.6  | 4.88E-07 | 4.94E-99  | 89.6  | 2.17E-07 | 8.02E-67 | 104.6 | 1.85E-08 | 2.30E-61 | 119.6 | 2.64E-09 | 1.51E-59 |
| 74.7  | 4.86E-07 | 8.38E-99  | 89.7  | 2.15E-07 | 9.17E-67 | 104.7 | 1.81E-08 | 2.44E-61 | 119.7 | 2.58E-09 | 1.52E-59 |
| 74.8  | 4.96E-07 | 1.25E-98  | 89.8  | 2.22E-07 | 1.26E-66 | 104.8 | 1.81E-08 | 2.44E-61 | 119.8 | 2.58E-09 | 1.52E-59 |
| 74.9  | 4.96E-07 | 1.25E-98  | 89.9  | 2.09E-07 | 1.32E-66 | 104.9 | 1.81E-08 | 2.44E-61 | 119.9 | 2.40E-09 | 1.55E-59 |
| 120   | 2.40E-09 | 1.55E-59  | 135   | 1.63E-10 | 5.21E-57 | 150   | 4.54E-11 | 9.41E-53 | 165   | 2.80E-11 | 6.87E-51 |
| 120.1 | 2.36E-09 | 1.58E-59  | 135.1 | 1.62E-10 | 5.32E-57 | 150.1 | 4.54E-11 | 9.41E-53 | 165.1 | 2.63E-11 | 6.64E-51 |
| 120.2 | 2.36E-09 | 1.58E-59  | 135.2 | 1.47E-10 | 6.74E-57 | 150.2 | 4.53E-11 | 1.04E-52 | 165.2 | 2.63E-11 | 6.64E-51 |
| 120.3 | 2.36E-09 | 1.58E-59  | 135.3 | 1.48E-10 | 7.14E-57 | 150.3 | 4.53E-11 | 1.04E-52 | 165.3 | 2.63E-11 | 6.64E-51 |
| 120.4 | 2.29E-09 | 1.56E-59  | 135.4 | 1.48E-10 | 7.14E-57 | 150.4 | 4.47E-11 | 9.50E-53 | 165.4 | 2.63E-11 | 6.64E-51 |
| 120.5 | 2.25E-09 | 1.66E-59  | 135.5 | 1.49E-10 | 7.91E-57 | 150.5 | 4.45E-11 | 1.10E-52 | 165.5 | 2.62E-11 | 8.00E-51 |
| 120.6 | 2.25E-09 | 1.66E-59  | 135.6 | 1.47E-10 | 8.50E-57 | 150.6 | 4.34E-11 | 1.13E-52 | 165.6 | 2.62E-11 | 8.00E-51 |
| 120.7 | 2.18E-09 | 1.62E-59  | 135.7 | 1.47E-10 | 8.50E-57 | 150.7 | 4.21E-11 | 1.14E-52 | 165.7 | 2.62E-11 | 8.00E-51 |
| 120.8 | 2.21E-09 | 1.75E-59  | 135.8 | 1.46E-10 | 9.46E-57 | 150.8 | 4.21E-11 | 1.14E-52 | 165.8 | 2.63E-11 | 8.97E-51 |
| 120.9 | 2.12E-09 | 1.89E-59  | 135.9 | 1.44E-10 | 1.05E-56 | 150.9 | 4.21E-11 | 1.14E-52 | 165.9 | 2.63E-11 | 8.97E-51 |
| 121   | 2.05E-09 | 1.96E-59  | 136   | 1.44E-10 | 1.05E-56 | 151   | 4.06E-11 | 1.09E-52 | 166   | 2.66E-11 | 1.03E-50 |
| 121.1 | 2.05E-09 | 1.96E-59  | 136.1 | 1.36E-10 | 1.04E-56 | 151.1 | 4.13E-11 | 1.15E-52 | 166.1 | 2.66E-11 | 1.03E-50 |
| 121.2 | 2.00E-09 | 2.14E-59  | 136.2 | 1.31E-10 | 1.10E-56 | 151.2 | 4.17E-11 | 1.23E-52 | 166.2 | 2.66E-11 | 1.03E-50 |
| 121.3 | 2.00E-09 | 2.14E-59  | 136.3 | 1.21E-10 | 1.19E-56 | 151.3 | 4.17E-11 | 1.23E-52 | 166.3 | 2.65E-11 | 1.04E-50 |
| 121.4 | 1.97E-09 | 2.29E-59  | 136.4 | 1.18E-10 | 1.28E-56 | 151.4 | 4.17E-11 | 1.23E-52 | 166.4 | 2.67E-11 | 1.06E-50 |
| 121.5 | 1.97E-09 | 2.29E-59  | 136.5 | 1.16E-10 | 1.30E-56 | 151.5 | 4.01E-11 | 1.22E-52 | 166.5 | 2.57E-11 | 1.02E-50 |
| 121.6 | 1.95E-09 | 2.33E-59  | 136.6 | 1.13E-10 | 1.37E-56 | 151.6 | 4.06E-11 | 1.43E-52 | 166.6 | 2.48E-11 | 9.94E-51 |
| 121.7 | 1.95E-09 | 2.33E-59  | 136.7 | 1.09E-10 | 1.37E-56 | 151.7 | 3.96E-11 | 1.45E-52 | 166.7 | 2.52E-11 | 1.06E-50 |
| 121.8 | 1.95E-09 | 2.33E-59  | 136.8 | 1.07E-10 | 1.63E-56 | 151.8 | 3.96E-11 | 1.45E-52 | 166.8 | 2.52E-11 | 1.06E-50 |
| 121.9 | 1.85E-09 | 2.46E-59  | 136.9 | 1.07E-10 | 1.63E-56 | 151.9 | 3.96E-11 | 1.45E-52 | 166.9 | 2.53E-11 | 1.20E-50 |
| 122   | 1.85E-09 | 2.46E-59  | 137   | 1.06E-10 | 1.84E-56 | 152   | 3.96E-11 | 1.45E-52 | 167   | 2.53E-11 | 1.20E-50 |
| 122.1 | 1.80E-09 | 2.61E-59  | 137.1 | 1.05E-10 | 2.26E-56 | 152.1 | 3.96E-11 | 1.45E-52 | 167.1 | 2.56E-11 | 1.35E-50 |
| 122.2 | 1.80E-09 | 2.61E-59  | 137.2 | 1.02E-10 | 2.40E-56 | 152.2 | 3.96E-11 | 1.45E-52 | 167.2 | 2.58E-11 | 1.44E-50 |
| 122.3 | 1.81E-09 | 3.05E-59  | 137.3 | 1.03E-10 | 2.61E-56 | 152.3 | 3.86E-11 | 1.55E-52 | 167.3 | 2.42     |          |

|       |          |          |       |          |          |       |          |          |       |          |          |
|-------|----------|----------|-------|----------|----------|-------|----------|----------|-------|----------|----------|
| 126.1 | 1.00E-09 | 1.07E-58 | 141.1 | 7.34E-11 | 3.62E-55 | 156.1 | 3.89E-11 | 7.50E-52 | 171.1 | 1.65E-11 | 2.49E-50 |
| 126.2 | 9.77E-10 | 1.02E-58 | 141.2 | 6.82E-11 | 3.54E-55 | 156.2 | 4.01E-11 | 7.56E-52 | 171.2 | 1.68E-11 | 2.68E-50 |
| 126.3 | 9.72E-10 | 1.03E-58 | 141.3 | 7.01E-11 | 4.08E-55 | 156.3 | 4.01E-11 | 7.56E-52 | 171.3 | 1.63E-11 | 2.72E-50 |
| 126.4 | 9.72E-10 | 1.03E-58 | 141.4 | 6.78E-11 | 4.22E-55 | 156.4 | 4.09E-11 | 7.95E-52 | 171.4 | 1.65E-11 | 2.97E-50 |
| 126.5 | 1.03E-09 | 1.20E-58 | 141.5 | 6.68E-11 | 5.49E-55 | 156.5 | 4.09E-11 | 7.95E-52 | 171.5 | 1.56E-11 | 2.91E-50 |
| 126.6 | 9.94E-10 | 1.26E-58 | 141.6 | 6.60E-11 | 5.99E-55 | 156.6 | 4.11E-11 | 8.06E-52 | 171.6 | 1.55E-11 | 2.91E-50 |
| 126.7 | 9.58E-10 | 1.28E-58 | 141.7 | 6.50E-11 | 6.88E-55 | 156.7 | 4.11E-11 | 8.06E-52 | 171.7 | 1.56E-11 | 2.91E-50 |
| 126.8 | 9.58E-10 | 1.28E-58 | 141.8 | 6.25E-11 | 6.74E-55 | 156.8 | 4.15E-11 | 8.54E-52 | 171.8 | 1.57E-11 | 3.00E-50 |
| 126.9 | 9.56E-10 | 1.37E-58 | 141.9 | 6.44E-11 | 7.61E-55 | 156.9 | 3.94E-11 | 8.10E-52 | 171.9 | 1.52E-11 | 3.02E-50 |
| 127   | 9.17E-10 | 1.32E-58 | 142   | 6.44E-11 | 7.61E-55 | 157   | 3.82E-11 | 8.27E-52 | 172   | 1.49E-11 | 2.89E-50 |
| 127.1 | 8.44E-10 | 1.48E-58 | 142.1 | 6.35E-11 | 9.28E-55 | 157.1 | 3.92E-11 | 8.84E-52 | 172.1 | 1.46E-11 | 3.11E-50 |
| 127.2 | 7.99E-10 | 1.41E-58 | 142.2 | 6.26E-11 | 9.51E-55 | 157.2 | 4.07E-11 | 1.00E-51 | 172.2 | 1.46E-11 | 3.11E-50 |
| 127.3 | 7.99E-10 | 1.41E-58 | 142.3 | 6.26E-11 | 9.51E-55 | 157.3 | 4.10E-11 | 1.04E-51 | 172.3 | 1.42E-11 | 3.13E-50 |
| 127.4 | 7.91E-10 | 1.50E-58 | 142.4 | 6.26E-11 | 9.51E-55 | 157.4 | 4.21E-11 | 1.19E-51 | 172.4 | 1.42E-11 | 3.13E-50 |
| 127.5 | 7.52E-10 | 1.53E-58 | 142.5 | 6.16E-11 | 1.13E-54 | 157.5 | 4.24E-11 | 1.24E-51 | 172.5 | 1.42E-11 | 3.13E-50 |
| 127.6 | 7.52E-10 | 1.53E-58 | 142.6 | 6.22E-11 | 1.25E-54 | 157.6 | 4.24E-11 | 1.24E-51 | 172.6 | 1.42E-11 | 3.13E-50 |
| 127.7 | 7.58E-10 | 1.66E-58 | 142.7 | 6.19E-11 | 1.62E-54 | 157.7 | 4.14E-11 | 1.30E-51 | 172.7 | 1.42E-11 | 3.13E-50 |
| 127.8 | 7.58E-10 | 1.66E-58 | 142.8 | 5.97E-11 | 1.65E-54 | 157.8 | 4.14E-11 | 1.30E-51 | 172.8 | 1.42E-11 | 3.01E-50 |
| 127.9 | 7.30E-10 | 1.66E-58 | 142.9 | 6.08E-11 | 1.90E-54 | 157.9 | 4.14E-11 | 1.30E-51 | 172.9 | 1.36E-11 | 2.98E-50 |
| 128   | 7.14E-10 | 1.71E-58 | 143   | 6.11E-11 | 2.10E-54 | 158   | 4.21E-11 | 1.45E-51 | 173   | 1.34E-11 | 3.05E-50 |
| 128.1 | 7.14E-10 | 1.71E-58 | 143.1 | 6.00E-11 | 2.17E-54 | 158.1 | 4.25E-11 | 1.54E-51 | 173.1 | 1.28E-11 | 3.04E-50 |
| 128.2 | 7.14E-10 | 1.71E-58 | 143.2 | 5.89E-11 | 2.43E-54 | 158.2 | 4.32E-11 | 1.60E-51 | 173.2 | 1.27E-11 | 3.04E-50 |
| 128.3 | 6.62E-10 | 1.96E-58 | 143.3 | 5.77E-11 | 2.98E-54 | 158.3 | 4.32E-11 | 1.60E-51 | 173.3 | 1.22E-11 | 3.09E-50 |
| 128.4 | 6.28E-10 | 2.19E-58 | 143.4 | 5.77E-11 | 2.98E-54 | 158.4 | 4.32E-11 | 1.60E-51 | 173.4 | 1.20E-11 | 3.30E-50 |
| 128.5 | 6.29E-10 | 2.55E-58 | 143.5 | 5.78E-11 | 3.05E-54 | 158.5 | 4.32E-11 | 1.60E-51 | 173.5 | 1.20E-11 | 3.30E-50 |
| 128.6 | 6.17E-10 | 2.73E-58 | 143.6 | 5.85E-11 | 3.59E-54 | 158.6 | 4.33E-11 | 1.85E-51 | 173.6 | 1.08E-11 | 3.24E-50 |
| 128.7 | 6.12E-10 | 3.10E-58 | 143.7 | 5.79E-11 | 3.65E-54 | 158.7 | 4.44E-11 | 2.14E-51 | 173.7 | 1.08E-11 | 3.24E-50 |
| 128.8 | 5.75E-10 | 3.18E-58 | 143.8 | 5.71E-11 | 4.11E-54 | 158.8 | 4.34E-11 | 2.06E-51 | 173.8 | 1.08E-11 | 3.24E-50 |
| 128.9 | 5.75E-10 | 3.18E-58 | 143.9 | 5.81E-11 | 4.74E-54 | 158.9 | 4.44E-11 | 2.33E-51 | 173.9 | 1.07E-11 | 3.05E-50 |
| 129   | 5.70E-10 | 3.40E-58 | 144   | 5.75E-11 | 5.73E-54 | 159   | 4.24E-11 | 2.27E-51 | 174   | 1.07E-11 | 3.05E-50 |
| 129.1 | 5.70E-10 | 3.40E-58 | 144.1 | 5.75E-11 | 5.73E-54 | 159.1 | 4.24E-11 | 2.27E-51 | 174.1 | 1.02E-11 | 3.15E-50 |
| 129.2 | 5.70E-10 | 3.68E-58 | 144.2 | 5.75E-11 | 5.73E-54 | 159.2 | 4.24E-11 | 2.27E-51 | 174.2 | 1.01E-11 | 3.29E-50 |
| 129.3 | 5.65E-10 | 3.86E-58 | 144.3 | 5.59E-11 | 7.87E-54 | 159.3 | 4.28E-11 | 2.36E-51 | 174.3 | 9.87E-12 | 3.37E-50 |
| 129.4 | 5.49E-10 | 3.84E-58 | 144.4 | 5.59E-11 | 7.87E-54 | 159.4 | 4.28E-11 | 2.36E-51 | 174.4 | 9.65E-12 | 3.33E-50 |
| 129.5 | 5.25E-10 | 4.18E-58 | 144.5 | 5.50E-11 | 8.21E-54 | 159.5 | 4.28E-11 | 2.36E-51 | 174.5 | 9.41E-12 | 3.32E-50 |
| 129.6 | 4.84E-10 | 4.81E-58 | 144.6 | 5.44E-11 | 8.60E-54 | 159.6 | 4.11E-11 | 2.26E-51 | 174.6 | 9.41E-12 | 3.32E-50 |
| 129.7 | 4.78E-10 | 5.10E-58 | 144.7 | 5.44E-11 | 8.60E-54 | 159.7 | 4.04E-11 | 2.36E-51 | 174.7 | 9.78E-12 | 3.71E-50 |
| 129.8 | 4.85E-10 | 5.39E-58 | 144.8 | 5.43E-11 | 1.07E-53 | 159.8 | 4.04E-11 | 2.36E-51 | 174.8 | 9.78E-12 | 3.71E-50 |
| 129.9 | 4.76E-10 | 5.41E-58 | 144.9 | 5.43E-11 | 1.07E-53 | 159.9 | 4.04E-11 | 2.36E-51 | 174.9 | 9.78E-12 | 3.71E-50 |
| 130   | 4.61E-10 | 5.37E-58 | 145   | 5.47E-11 | 1.12E-53 | 160   | 4.04E-11 | 2.36E-51 | 175   | 9.78E-12 | 3.71E-50 |
| 130.1 | 4.40E-10 | 5.52E-58 | 145.1 | 5.35E-11 | 1.14E-53 | 160.1 | 4.04E-11 | 2.36E-51 | 175.1 | 9.40E-12 | 3.71E-50 |
| 130.2 | 4.30E-10 | 5.86E-58 | 145.2 | 5.35E-11 | 1.14E-53 | 160.2 | 4.09E-11 | 2.50E-51 | 175.2 | 9.40E-12 | 3.71E-50 |
| 130.3 | 4.04E-10 | 6.43E-58 | 145.3 | 5.34E-11 | 1.28E-53 | 160.3 | 4.17E-11 | 2.82E-51 | 175.3 | 8.84E-12 | 4.00E-50 |
| 130.4 | 3.94E-10 | 6.79E-58 | 145.4 | 5.34E-11 | 1.28E-53 | 160.4 | 4.17E-11 | 2.82E-51 | 175.4 | 8.74E-12 | 4.15E-50 |
| 130.5 | 3.92E-10 | 7.72E-58 | 145.5 | 4.95E-11 | 1.30E-53 | 160.5 | 4.14E-11 | 3.27E-51 | 175.5 | 8.74E-12 | 4.15E-50 |
| 130.6 | 3.94E-10 | 8.41E-58 | 145.6 | 4.95E-11 | 1.30E-53 | 160.6 | 3.98E-11 | 3.14E-51 | 175.6 | 8.74E-12 | 4.15E-50 |
| 130.7 | 3.81E-10 | 9.94E-58 | 145.7 | 5.05E-11 | 1.39E-53 | 160.7 | 3.98E-11 | 3.14E-51 | 175.7 | 8.74E-12 | 4.15E-50 |
| 130.8 | 3.81E-10 | 9.94E-58 | 145.8 | 4.88E-11 | 1.42E-53 | 160.8 | 3.98E-11 | 3.14E-51 | 175.8 | 8.60E-12 | 4.29E-50 |
| 130.9 | 3.80E-10 | 1.08E-57 | 145.9 | 4.88E-11 | 1.42E-53 | 160.9 | 3.91E-11 | 3.04E-51 | 175.9 | 8.56E-12 | 4.73E-50 |
| 131   | 3.71E-10 | 1.07E-57 | 146   | 4.97E-11 | 1.48E-53 | 161   | 3.96E-11 | 2.98E-51 | 176   | 8.20E-12 | 5.13E-50 |
| 131.1 | 3.73E-10 | 1.21E-57 | 146.1 | 5.06E-11 | 1.67E-53 | 161.1 | 3.96E-11 | 2.98E-51 | 176.1 | 8.20E-12 | 5.13E-50 |
| 131.2 | 3.73E-10 | 1.21E-57 | 146.2 | 5.06E-11 | 1.67E-53 | 161.2 | 3.78E-11 | 2.90E-51 | 176.2 | 8.20E-12 | 5.13E-50 |
| 131.3 | 3.63E-10 | 1.23E-57 | 146.3 | 5.14E-11 | 1.87E-53 | 161.3 | 3.75E-11 | 2.92E-51 | 176.3 | 7.98E-12 | 5.21E-50 |
| 131.4 | 3.56E-10 | 1.20E-57 | 146.4 | 5.14E-11 | 1.87E-53 | 161.4 | 3.52E-11 | 2.98E-51 | 176.4 | 7.98E-12 | 5.21E-50 |
| 131.5 | 3.56E-10 | 1.20E-57 | 146.5 | 5.14E-11 | 1.93E-53 | 161.5 | 3.52E-11 | 2.98E-51 | 176.5 | 7.80E-12 | 5.37E-50 |
| 131.6 | 3.18E-10 | 1.43E-57 | 146.6 | 5.14E-11 | 1.93E-53 | 161.6 | 3.57E-11 | 3.04E-51 | 176.6 | 7.83E-12 | 5.63E-50 |
| 131.7 | 3.13E-10 | 1.50E-57 | 146.7 | 5.16E-11 | 1.95E-53 | 161.7 | 3.60E-11 | 3.18E-51 | 176.7 | 7.97E-12 | 6.43E-50 |
| 131.8 | 3.05E-10 | 1.77E-57 | 146.8 | 4.97E-11 | 2.01E-53 | 161.8 | 3.59E-11 | 3.61E-51 | 176.8 | 7.97E-12 | 6.43E-50 |
| 131.9 | 3.05E-10 | 1.77E-57 | 146.9 | 5.09E-11 | 2.35E-53 | 161.9 | 3.59E-11 | 3.61E-51 | 176.9 | 7.91E-12 | 6.71E-50 |
| 132   | 2.99E-10 | 2.04E-57 | 147   | 5.09E-11 | 2.35E-53 | 162   | 3.59E-11 | 3.61E-51 | 177   | 7.79E-12 | 6.98E-50 |
| 132.1 | 2.99E-10 | 2.04E-57 | 147.1 | 5.16E-11 | 2.50E-53 | 162.1 | 3.59E-11 | 3.61E-51 | 177.1 | 7.79E-12 | 6.98E-50 |
| 132.2 | 2.78E-10 | 2.09E-57 | 147.2 | 5.03E-11 | 2.62E-53 | 162.2 | 3.59E-11 | 3.61E-51 | 177.2 | 7.79E-12 | 6.98E-50 |
| 132.3 | 2.67E-10 | 2.21E-57 | 147.3 | 4.89E-11 | 2.92E-53 | 162.3 | 3.41E-11 | 4.53E-51 | 177.3 | 7.65E-12 | 6.98E-50 |
| 132.4 | 2.63E-10 | 2.54E-57 | 147.4 | 4.89E-11 | 2.92E-53 | 162.4 | 3.41E-11 | 4.53E-51 | 177.4 | 7.65E-12 | 6.98E-50 |
| 132.5 | 2.52E-10 | 2.70E-57 | 147.5 | 4.82E-11 | 3.01E-53 | 162.5 | 3.17E-11 | 4.27E-51 | 177.5 | 7.54E-12 | 7.43E-50 |
| 132.6 | 2.36E-10 | 2.31E-57 | 147.6 | 5.01E-11 | 3.54E-53 | 162.6 | 3.17E-11 | 4.27E-51 | 177.6 | 7.54E-12 | 7.43E-50 |
| 132.7 | 2.27E-10 | 2.55E-57 | 147.7 | 5.02E-11 | 3.75E-53 | 162.7 | 3.17E-11 | 4.27E-51 | 177.7 | 7.61E-12 | 7.65E-50 |
| 132.8 | 2.27E-10 | 2.55E-57 | 147.8 | 5.02E-11 | 3.75E-53 | 162.8 | 3.19E-11 | 4.19E-51 | 177.8 | 7.46E-12 | 7.91E-50 |
| 132.9 | 2.21E-10 | 2.65E-57 | 147.9 | 5.02E-11 | 3.75E-53 | 162.9 | 3.21E-11 | 5.05E-51 | 177.9 | 7.46E-12 | 7.91E-50 |
| 133   | 2.21E-10 | 2.69E-57 | 148   | 5.02E-11 | 3.75E-53 | 163   | 3.21E-11 | 5.05E-51 | 178   | 6.68E-12 | 8.51E-50 |
| 133.1 | 2.21E-10 | 2.69E-57 | 148.1 | 4.62E-11 | 3.79E-53 | 163.1 | 3.04E-11 | 4.86E-51 | 178.1 | 6.68E-12 | 8.51E-50 |
| 133.2 | 2.07E-10 | 3.01E-57 | 148.2 | 4.59E-11 | 3.96E-53 | 163.2 | 3.04E-11 | 4.86E-51 | 178.2 | 6.48E-12 | 8.73E-50 |
| 133.3 | 2.01E-10 | 3.14E-57 | 148.3 | 4.59E-11 | 3.96E-53 | 163.3 | 3.04E-11 | 4.86E-51 | 178.3 | 6.26E-12 | 9.36E-50 |
| 133.4 | 1.93E-10 | 3.45E-57 | 148.4 | 4.61E-11 | 4.66E-53 | 163.4 | 2.87E-11 | 4.66E-51 | 178.4 | 6.11E-12 | 9.61E-50 |
| 133.5 | 1.90E-10 | 3.50E-57 | 148.5 | 4.61E-11 | 4.66E-53 | 163.5 | 2.87E-11 | 5.25E-51 | 178.5 | 6.11E-12 | 9.61E-50 |
| 133.6 | 1.90E-10 | 3.50E-57 | 148.6 | 4.56E-11 | 4.82E-53 | 163.6 | 2.87E-11 | 5.25E-51 | 178.6 | 5.87E-12 | 9.73E-50 |
| 133.7 | 1.85E-10 | 3.78E-57 | 148.7 | 4.56E-11 | 4.82E-53 | 163.7 | 2.87E-11 | 5.25E-51 | 178.7 | 5.75E-12 | 1.01E-49 |
| 133.8 | 1.83E-10 | 4.06E-57 | 148.8 | 4.53E-11 | 5.32E-53 | 163.8 | 2.91E-11 | 5.62E-51 | 178.8 | 5.75E-12 | 1.01E-49 |
| 133.9 | 1.83E-10 | 4.06E-57 | 148.9 | 4.48E-11 | 5.14E-53 | 163.9 | 2.94E-11 | 6.24E-51 | 178.9 | 5.75E-12 | 1.01E-49 |
| 134   | 1.80E-10 | 3.62E-57 | 149   | 4.48E-11 | 5.14E-53 | 164   | 2.83E-11 | 6.97E-51 | 179   | 5.75E-12 | 1.01E-49 |
| 134.1 | 1.80E-10 | 3.62E-57 | 149.1 | 4.59E-11 | 5.78E-53 | 164.1 | 2.83E-11 | 6.97E-51 | 179.1 | 5.66E-12 | 1.07E-49 |
| 134.2 | 1.85E-10 | 4.01E-57 | 149.2 | 4.62E-11 | 5.99E-53 | 164.2 | 2.83E-11 | 6.97E-51 | 179.2 | 5.43E-12 | 1.10E-49 |
| 134.3 | 1.81E-10 | 4.72E-57 | 149.3 | 4.62E-11 | 5.99E-53 | 164.3 | 2.83E-11 | 6.97E-51 | 179.3 | 5.41E-12 | 1.24E-49 |
| 134.4 | 1.73E-10 | 4.80E-57 | 1     |          |          |       |          |          |       |          |          |



|       |          |          |       |          |          |       |          |          |       |          |          |
|-------|----------|----------|-------|----------|----------|-------|----------|----------|-------|----------|----------|
| 183.2 | 2.99E-12 | 4.76E-49 | 198.2 | 1.96E-12 | 1.74E-47 | 213.2 | 1.76E-12 | 1.75E-47 | 228.2 | 1.72E-12 | 3.26E-47 |
| 183.3 | 2.90E-12 | 5.11E-49 | 198.3 | 1.96E-12 | 1.74E-47 | 213.3 | 1.76E-12 | 1.75E-47 | 228.3 | 1.74E-12 | 3.32E-47 |
| 183.4 | 2.90E-12 | 5.11E-49 | 198.4 | 1.98E-12 | 1.76E-47 | 213.4 | 1.76E-12 | 1.75E-47 | 228.4 | 1.70E-12 | 3.04E-47 |
| 183.5 | 2.90E-12 | 5.11E-49 | 198.5 | 1.98E-12 | 1.76E-47 | 213.5 | 1.77E-12 | 1.84E-47 | 228.5 | 1.70E-12 | 3.04E-47 |
| 183.6 | 2.85E-12 | 5.94E-49 | 198.6 | 1.98E-12 | 1.76E-47 | 213.6 | 1.75E-12 | 1.79E-47 | 228.6 | 1.70E-12 | 3.04E-47 |
| 183.7 | 2.89E-12 | 6.38E-49 | 198.7 | 1.98E-12 | 1.76E-47 | 213.7 | 1.76E-12 | 1.84E-47 | 228.7 | 1.70E-12 | 3.04E-47 |
| 183.8 | 2.91E-12 | 6.94E-49 | 198.8 | 1.99E-12 | 1.68E-47 | 213.8 | 1.76E-12 | 1.84E-47 | 228.8 | 1.70E-12 | 3.04E-47 |
| 183.9 | 2.91E-12 | 6.94E-49 | 198.9 | 1.94E-12 | 1.55E-47 | 213.9 | 1.76E-12 | 1.84E-47 | 228.9 | 1.70E-12 | 3.04E-47 |
| 184   | 3.04E-12 | 8.03E-49 | 199   | 1.93E-12 | 1.63E-47 | 214   | 1.76E-12 | 1.84E-47 | 229   | 1.70E-12 | 3.04E-47 |
| 184.1 | 2.97E-12 | 7.34E-49 | 199.1 | 1.93E-12 | 1.63E-47 | 214.1 | 1.76E-12 | 1.84E-47 | 229.1 | 1.70E-12 | 3.04E-47 |
| 184.2 | 2.92E-12 | 6.93E-49 | 199.2 | 1.90E-12 | 1.65E-47 | 214.2 | 1.76E-12 | 1.84E-47 | 229.2 | 1.70E-12 | 3.04E-47 |
| 184.3 | 2.97E-12 | 7.55E-49 | 199.3 | 1.90E-12 | 1.66E-47 | 214.3 | 1.79E-12 | 1.99E-47 | 229.3 | 1.70E-12 | 3.04E-47 |
| 184.4 | 2.87E-12 | 8.01E-49 | 199.4 | 1.93E-12 | 1.71E-47 | 214.4 | 1.79E-12 | 1.99E-47 | 229.4 | 1.67E-12 | 3.14E-47 |
| 184.5 | 2.87E-12 | 8.65E-49 | 199.5 | 1.94E-12 | 1.85E-47 | 214.5 | 1.79E-12 | 1.95E-47 | 229.5 | 1.67E-12 | 3.14E-47 |
| 184.6 | 2.90E-12 | 9.51E-49 | 199.6 | 1.94E-12 | 1.85E-47 | 214.6 | 1.79E-12 | 1.95E-47 | 229.6 | 1.67E-12 | 3.14E-47 |
| 184.7 | 2.90E-12 | 9.51E-49 | 199.7 | 1.94E-12 | 1.85E-47 | 214.7 | 1.79E-12 | 1.95E-47 | 229.7 | 1.67E-12 | 3.14E-47 |
| 184.8 | 2.82E-12 | 1.01E-48 | 199.8 | 1.93E-12 | 1.91E-47 | 214.8 | 1.79E-12 | 1.95E-47 | 229.8 | 1.67E-12 | 3.14E-47 |
| 184.9 | 2.82E-12 | 1.09E-48 | 199.9 | 1.93E-12 | 1.91E-47 | 214.9 | 1.79E-12 | 1.95E-47 | 229.9 | 1.67E-12 | 3.14E-47 |
| 185   | 2.82E-12 | 1.09E-48 | 200   | 1.93E-12 | 1.91E-47 | 215   | 1.79E-12 | 1.95E-47 | 230   | 1.67E-12 | 3.14E-47 |
| 185.1 | 2.83E-12 | 1.16E-48 | 200.1 | 1.95E-12 | 2.00E-47 | 215.1 | 1.79E-12 | 1.95E-47 | 230.1 | 1.67E-12 | 3.14E-47 |
| 185.2 | 2.82E-12 | 1.24E-48 | 200.2 | 1.95E-12 | 2.00E-47 | 215.2 | 1.79E-12 | 1.95E-47 | 230.2 | 1.67E-12 | 3.14E-47 |
| 185.3 | 2.82E-12 | 1.24E-48 | 200.3 | 1.95E-12 | 2.00E-47 | 215.3 | 1.79E-12 | 1.95E-47 | 230.3 | 1.67E-12 | 3.14E-47 |
| 185.4 | 2.82E-12 | 1.24E-48 | 200.4 | 1.95E-12 | 2.00E-47 | 215.4 | 1.78E-12 | 1.92E-47 | 230.4 | 1.67E-12 | 3.14E-47 |
| 185.5 | 2.62E-12 | 1.29E-48 | 200.5 | 1.95E-12 | 2.00E-47 | 215.5 | 1.78E-12 | 1.92E-47 | 230.5 | 1.67E-12 | 3.14E-47 |
| 185.6 | 2.63E-12 | 1.40E-48 | 200.6 | 1.95E-12 | 2.00E-47 | 215.6 | 1.71E-12 | 1.93E-47 | 230.6 | 1.67E-12 | 3.14E-47 |
| 185.7 | 2.53E-12 | 1.45E-48 | 200.7 | 1.95E-12 | 1.96E-47 | 215.7 | 1.71E-12 | 1.88E-47 | 230.7 | 1.67E-12 | 3.14E-47 |
| 185.8 | 2.55E-12 | 1.65E-48 | 200.8 | 1.93E-12 | 1.84E-47 | 215.8 | 1.71E-12 | 1.88E-47 | 230.8 | 1.62E-12 | 3.16E-47 |
| 185.9 | 2.55E-12 | 1.65E-48 | 200.9 | 1.93E-12 | 1.84E-47 | 215.9 | 1.71E-12 | 1.88E-47 | 230.9 | 1.62E-12 | 3.16E-47 |
| 186   | 2.50E-12 | 1.77E-48 | 201   | 1.93E-12 | 1.84E-47 | 216   | 1.71E-12 | 1.88E-47 | 231   | 1.62E-12 | 3.16E-47 |
| 186.1 | 2.50E-12 | 1.77E-48 | 201.1 | 1.93E-12 | 1.84E-47 | 216.1 | 1.71E-12 | 1.88E-47 | 231.1 | 1.62E-12 | 3.16E-47 |
| 186.2 | 2.50E-12 | 1.93E-48 | 201.2 | 1.90E-12 | 1.66E-47 | 216.2 | 1.68E-12 | 1.99E-47 | 231.2 | 1.62E-12 | 3.16E-47 |
| 186.3 | 2.50E-12 | 1.93E-48 | 201.3 | 1.90E-12 | 1.66E-47 | 216.3 | 1.68E-12 | 1.99E-47 | 231.3 | 1.62E-12 | 3.16E-47 |
| 186.4 | 2.49E-12 | 2.09E-48 | 201.4 | 1.90E-12 | 1.66E-47 | 216.4 | 1.68E-12 | 1.99E-47 | 231.4 | 1.62E-12 | 3.16E-47 |
| 186.5 | 2.53E-12 | 2.33E-48 | 201.5 | 1.90E-12 | 1.66E-47 | 216.5 | 1.68E-12 | 1.99E-47 | 231.5 | 1.64E-12 | 3.24E-47 |
| 186.6 | 2.53E-12 | 2.33E-48 | 201.6 | 1.91E-12 | 1.82E-47 | 216.6 | 1.68E-12 | 1.99E-47 | 231.6 | 1.65E-12 | 3.44E-47 |
| 186.7 | 2.63E-12 | 2.80E-48 | 201.7 | 1.91E-12 | 1.82E-47 | 216.7 | 1.68E-12 | 1.99E-47 | 231.7 | 1.63E-12 | 3.32E-47 |
| 186.8 | 2.64E-12 | 2.99E-48 | 201.8 | 1.90E-12 | 1.77E-47 | 216.8 | 1.78E-12 | 2.16E-47 | 231.8 | 1.63E-12 | 3.32E-47 |
| 186.9 | 2.64E-12 | 3.31E-48 | 201.9 | 1.90E-12 | 1.77E-47 | 216.9 | 1.78E-12 | 2.16E-47 | 231.9 | 1.63E-12 | 3.32E-47 |
| 187   | 2.64E-12 | 3.31E-48 | 202   | 1.90E-12 | 1.77E-47 | 217   | 1.78E-12 | 2.16E-47 | 232   | 1.62E-12 | 3.30E-47 |
| 187.1 | 2.60E-12 | 3.64E-48 | 202.1 | 1.90E-12 | 1.77E-47 | 217.1 | 1.78E-12 | 2.16E-47 | 232.1 | 1.62E-12 | 3.30E-47 |
| 187.2 | 2.62E-12 | 3.99E-48 | 202.2 | 1.86E-12 | 1.79E-47 | 217.2 | 1.78E-12 | 2.16E-47 | 232.2 | 1.62E-12 | 3.30E-47 |
| 187.3 | 2.62E-12 | 4.43E-48 | 202.3 | 1.83E-12 | 1.67E-47 | 217.3 | 1.76E-12 | 2.08E-47 | 232.3 | 1.62E-12 | 3.30E-47 |
| 187.4 | 2.59E-12 | 4.80E-48 | 202.4 | 1.83E-12 | 1.67E-47 | 217.4 | 1.73E-12 | 2.14E-47 | 232.4 | 1.59E-12 | 3.31E-47 |
| 187.5 | 2.59E-12 | 4.80E-48 | 202.5 | 1.83E-12 | 1.67E-47 | 217.5 | 1.73E-12 | 2.14E-47 | 232.5 | 1.59E-12 | 3.31E-47 |
| 187.6 | 2.59E-12 | 4.80E-48 | 202.6 | 1.83E-12 | 1.67E-47 | 217.6 | 1.73E-12 | 2.14E-47 | 232.6 | 1.59E-12 | 3.31E-47 |
| 187.7 | 2.53E-12 | 5.20E-48 | 202.7 | 1.83E-12 | 1.67E-47 | 217.7 | 1.73E-12 | 2.14E-47 | 232.7 | 1.59E-12 | 3.31E-47 |
| 187.8 | 2.53E-12 | 5.20E-48 | 202.8 | 1.83E-12 | 1.67E-47 | 217.8 | 1.71E-12 | 2.16E-47 | 232.8 | 1.59E-12 | 3.31E-47 |
| 187.9 | 2.49E-12 | 4.94E-48 | 202.9 | 1.83E-12 | 1.67E-47 | 217.9 | 1.72E-12 | 2.15E-47 | 232.9 | 1.59E-12 | 3.31E-47 |
| 188   | 2.54E-12 | 5.72E-48 | 203   | 1.83E-12 | 1.67E-47 | 218   | 1.72E-12 | 2.15E-47 | 233   | 1.59E-12 | 3.31E-47 |
| 188.1 | 2.56E-12 | 6.23E-48 | 203.1 | 1.83E-12 | 1.67E-47 | 218.1 | 1.72E-12 | 2.15E-47 | 233.1 | 1.59E-12 | 3.31E-47 |
| 188.2 | 2.56E-12 | 6.23E-48 | 203.2 | 1.83E-12 | 1.67E-47 | 218.2 | 1.72E-12 | 2.15E-47 | 233.2 | 1.59E-12 | 3.31E-47 |
| 188.3 | 2.51E-12 | 7.63E-48 | 203.3 | 1.80E-12 | 1.66E-47 | 218.3 | 1.72E-12 | 2.15E-47 | 233.3 | 1.59E-12 | 3.31E-47 |
| 188.4 | 2.51E-12 | 7.63E-48 | 203.4 | 1.80E-12 | 1.66E-47 | 218.4 | 1.72E-12 | 2.15E-47 | 233.4 | 1.59E-12 | 3.31E-47 |
| 188.5 | 2.54E-12 | 8.57E-48 | 203.5 | 1.75E-12 | 1.48E-47 | 218.5 | 1.72E-12 | 2.15E-47 | 233.5 | 1.59E-12 | 3.31E-47 |
| 188.6 | 2.48E-12 | 9.31E-48 | 203.6 | 1.75E-12 | 1.48E-47 | 218.6 | 1.72E-12 | 2.15E-47 | 233.6 | 1.59E-12 | 3.31E-47 |
| 188.7 | 2.48E-12 | 9.31E-48 | 203.7 | 1.76E-12 | 1.48E-47 | 218.7 | 1.72E-12 | 2.15E-47 | 233.7 | 1.59E-12 | 3.31E-47 |
| 188.8 | 2.41E-12 | 1.01E-47 | 203.8 | 1.76E-12 | 1.48E-47 | 218.8 | 1.72E-12 | 2.15E-47 | 233.8 | 1.53E-12 | 3.22E-47 |
| 188.9 | 2.39E-12 | 1.00E-47 | 203.9 | 1.76E-12 | 1.48E-47 | 218.9 | 1.72E-12 | 2.15E-47 | 233.9 | 1.53E-12 | 3.22E-47 |
| 189   | 2.41E-12 | 1.18E-47 | 204   | 1.76E-12 | 1.48E-47 | 219   | 1.72E-12 | 2.15E-47 | 234   | 1.53E-12 | 3.22E-47 |
| 189.1 | 2.41E-12 | 1.18E-47 | 204.1 | 1.76E-12 | 1.48E-47 | 219.1 | 1.80E-12 | 2.39E-47 | 234.1 | 1.55E-12 | 3.52E-47 |
| 189.2 | 2.35E-12 | 1.28E-47 | 204.2 | 1.76E-12 | 1.48E-47 | 219.2 | 1.80E-12 | 2.39E-47 | 234.2 | 1.56E-12 | 3.52E-47 |
| 189.3 | 2.43E-12 | 1.60E-47 | 204.3 | 1.76E-12 | 1.48E-47 | 219.3 | 1.80E-12 | 2.39E-47 | 234.3 | 1.56E-12 | 3.52E-47 |
| 189.4 | 2.43E-12 | 1.60E-47 | 204.4 | 1.76E-12 | 1.48E-47 | 219.4 | 1.77E-12 | 2.28E-47 | 234.4 | 1.52E-12 | 3.55E-47 |
| 189.5 | 2.43E-12 | 1.60E-47 | 204.5 | 1.76E-12 | 1.48E-47 | 219.5 | 1.77E-12 | 2.28E-47 | 234.5 | 1.52E-12 | 3.55E-47 |
| 189.6 | 2.35E-12 | 1.90E-47 | 204.6 | 1.76E-12 | 1.48E-47 | 219.6 | 1.77E-12 | 2.28E-47 | 234.6 | 1.52E-12 | 3.55E-47 |
| 189.7 | 2.35E-12 | 1.90E-47 | 204.7 | 1.76E-12 | 1.48E-47 | 219.7 | 1.77E-12 | 2.28E-47 | 234.7 | 1.52E-12 | 3.55E-47 |
| 189.8 | 2.37E-12 | 1.91E-47 | 204.8 | 1.76E-12 | 1.48E-47 | 219.8 | 1.77E-12 | 2.28E-47 | 234.8 | 1.48E-12 | 3.59E-47 |
| 189.9 | 2.37E-12 | 1.91E-47 | 204.9 | 1.77E-12 | 1.50E-47 | 219.9 | 1.62E-12 | 2.28E-47 | 234.9 | 1.48E-12 | 3.59E-47 |
| 190   | 2.36E-12 | 2.14E-47 | 205   | 1.77E-12 | 1.50E-47 | 220   | 1.62E-12 | 2.41E-47 | 235   | 1.48E-12 | 3.59E-47 |
| 190.1 | 2.36E-12 | 2.14E-47 | 205.1 | 1.77E-12 | 1.50E-47 | 220.1 | 1.62E-12 | 2.41E-47 | 235.1 | 1.48E-12 | 3.59E-47 |
| 190.2 | 2.36E-12 | 2.14E-47 | 205.2 | 1.77E-12 | 1.50E-47 | 220.2 | 1.62E-12 | 2.41E-47 | 235.2 | 1.48E-12 | 3.59E-47 |
| 190.3 | 2.36E-12 | 2.14E-47 | 205.3 | 1.77E-12 | 1.50E-47 | 220.3 | 1.62E-12 | 2.41E-47 | 235.3 | 1.48E-12 | 3.59E-47 |
| 190.4 | 2.36E-12 | 2.14E-47 | 205.4 | 1.77E-12 | 1.50E-47 | 220.4 | 1.62E-12 | 2.41E-47 | 235.4 | 1.48E-12 | 3.59E-47 |
| 190.5 | 2.36E-12 | 2.14E-47 | 205.5 | 1.77E-12 | 1.50E-47 | 220.5 | 1.62E-12 | 2.41E-47 | 235.5 | 1.48E-12 | 3.59E-47 |
| 190.6 | 2.36E-12 | 2.14E-47 | 205.6 | 1.77E-12 | 1.50E-47 | 220.6 | 1.62E-12 | 2.41E-47 | 235.6 | 1.48E-12 | 3.59E-47 |
| 190.7 | 2.36E-12 | 2.14E-47 | 205.7 | 1.77E-12 | 1.50E-47 | 220.7 | 1.62E-12 | 2.41E-47 | 235.7 | 1.46E-12 | 3.63E-47 |
| 190.8 | 2.36E-12 | 2.14E-47 | 205.8 | 1.77E-12 | 1.50E-47 | 220.8 | 1.60E-12 | 2.32E-47 | 235.8 | 1.46E-12 | 3.63E-47 |
| 190.9 | 2.36E-12 | 2.14E-47 | 205.9 | 1.77E-12 | 1.50E-47 | 220.9 | 1.62E-12 | 2.48E-47 | 235.9 | 1.46E-12 | 3.63E-47 |
| 191   | 2.36E-12 | 2.14E-47 | 206   | 1.77E-12 | 1.50E-47 | 221   | 1.62E-12 | 2.48E-47 | 236   | 1.43E-12 | 3.64E-47 |
| 191.1 | 2.35E-12 | 2.18E-47 | 206.1 | 1.77E-12 | 1.50E-47 | 221.1 | 1.62E-12 | 2.48E-47 | 236.1 | 1.43E-12 | 3.64E-47 |
| 191.2 | 2.35E-12 | 2.18E-47 | 206.2 | 1.77E-12 | 1.50E-47 | 221.2 | 1.62E-12 | 2.48E-47 | 236.2 | 1.43E-12 | 3.64E-47 |
| 191.3 | 2.31E-12 | 1.98E-47 | 206.3 | 1.77E-12 | 1.50E-47 | 221.3 | 1.63E-12 | 2.48E-47 | 236.3 | 1.43E-12 | 3.64E-47 |
| 191.4 | 2.31E-12 | 1.98E-47 | 206.4 | 1.77E-12 | 1.50E-47 | 221.4 | 1.63E-12 | 2.48E-47 | 236.4 | 1.43E-12 | 3.64E-47 |
| 191.5 | 2.31E-12 | 1.98E-47 | 2     |          |          |       |          |          |       |          |          |

Table S8: PRCC analysis data for [LACT] with  $[G](0)=2$  mM: PRCC sensitivity indices and their corresponding p-values

| Sensitivity analysis data from PRCC for [LACT] with $[G](0)=2$ mM (only the parameters to which [LACT]'s level is sensitive to appear) |            |            |   |                     |            |            |   |                     |            |            |   |                     |            |            |   |
|----------------------------------------------------------------------------------------------------------------------------------------|------------|------------|---|---------------------|------------|------------|---|---------------------|------------|------------|---|---------------------|------------|------------|---|
| Time discretization                                                                                                                    | L          | [LACT]_0   | 0 | Time discretization | L          | [LACT]_0   | 0 | Time discretization | L          | [LACT]_0   | 0 | Time discretization | L          | [LACT]_0   | 0 |
| 0                                                                                                                                      | 0          | 1          |   | 15                  | 0.27910113 | 0.956633   |   | 30                  | 0.3327426  | 0.92828007 |   | 45                  | 0.40172353 | 0.88525255 |   |
| 0.1                                                                                                                                    | 0.35885275 | 0.99530055 |   | 15.1                | 0.27984464 | 0.9565653  |   | 30.1                | 0.33287573 | 0.92819922 |   | 45.1                | 0.40272407 | 0.88519457 |   |
| 0.2                                                                                                                                    | 0.32781431 | 0.98747498 |   | 15.2                | 0.27933348 | 0.95653173 |   | 30.2                | 0.33277572 | 0.92808666 |   | 45.2                | 0.40320103 | 0.88512001 |   |
| 0.3                                                                                                                                    | 0.31180973 | 0.98260665 |   | 15.3                | 0.28071533 | 0.95549185 |   | 30.3                | 0.33205511 | 0.92783367 |   | 45.3                | 0.40275586 | 0.88486022 |   |
| 0.4                                                                                                                                    | 0.30401377 | 0.97965127 |   | 15.4                | 0.28057867 | 0.95623992 |   | 30.4                | 0.33183875 | 0.92762311 |   | 45.4                | 0.40280879 | 0.88477497 |   |
| 0.5                                                                                                                                    | 0.30289145 | 0.97863813 |   | 15.5                | 0.28292032 | 0.95623061 |   | 30.5                | 0.33352925 | 0.92745473 |   | 45.5                | 0.40317109 | 0.88488698 |   |
| 0.6                                                                                                                                    | 0.2982456  | 0.97734045 |   | 15.6                | 0.28271815 | 0.95620387 |   | 30.6                | 0.33514223 | 0.92740672 |   | 45.6                | 0.40365836 | 0.88443641 |   |
| 0.7                                                                                                                                    | 0.29532129 | 0.97609398 |   | 15.7                | 0.28344658 | 0.95620648 |   | 30.7                | 0.33695389 | 0.92732713 |   | 45.7                | 0.40373104 | 0.88410719 |   |
| 0.8                                                                                                                                    | 0.29046864 | 0.97522302 |   | 15.8                | 0.28592302 | 0.95607405 |   | 30.8                | 0.33904974 | 0.92656657 |   | 45.8                | 0.40376218 | 0.88393762 |   |
| 0.9                                                                                                                                    | 0.28808942 | 0.97566646 |   | 15.9                | 0.28443906 | 0.95599603 |   | 30.9                | 0.33986484 | 0.92596653 |   | 45.9                | 0.40474523 | 0.8840711  |   |
| 1                                                                                                                                      | 0.28658006 | 0.97521818 |   | 16                  | 0.2851793  | 0.95583549 |   | 31                  | 0.34100344 | 0.92561467 |   | 46                  | 0.40476298 | 0.88397342 |   |
| 1.1                                                                                                                                    | 0.28465456 | 0.97500318 |   | 16.1                | 0.2866845  | 0.95585858 |   | 31.1                | 0.34123252 | 0.92530723 |   | 46.1                | 0.40515169 | 0.88379902 |   |
| 1.2                                                                                                                                    | 0.28168228 | 0.9747368  |   | 16.2                | 0.28602399 | 0.95565963 |   | 31.2                | 0.34115843 | 0.92550555 |   | 46.2                | 0.40556394 | 0.88381036 |   |
| 1.3                                                                                                                                    | 0.27962314 | 0.97440863 |   | 16.3                | 0.28914251 | 0.95544672 |   | 31.3                | 0.3431874  | 0.92482108 |   | 46.3                | 0.40572541 | 0.8837821  |   |
| 1.4                                                                                                                                    | 0.276899   | 0.97402614 |   | 16.4                | 0.28839766 | 0.95518726 |   | 31.4                | 0.34447443 | 0.92450099 |   | 46.4                | 0.40640727 | 0.88342804 |   |
| 1.5                                                                                                                                    | 0.27529232 | 0.9730234  |   | 16.5                | 0.28808158 | 0.95511638 |   | 31.5                | 0.34344843 | 0.92405215 |   | 46.5                | 0.40689761 | 0.88349896 |   |
| 1.6                                                                                                                                    | 0.27689464 | 0.9736838  |   | 16.6                | 0.28849343 | 0.95489787 |   | 31.6                | 0.34276941 | 0.92380008 |   | 46.6                | 0.40699583 | 0.88339574 |   |
| 1.7                                                                                                                                    | 0.27688827 | 0.97343091 |   | 16.7                | 0.2882197  | 0.95480066 |   | 31.7                | 0.34278609 | 0.92375456 |   | 46.7                | 0.40736613 | 0.88339017 |   |
| 1.8                                                                                                                                    | 0.27631605 | 0.97319855 |   | 16.8                | 0.28794688 | 0.95476336 |   | 31.8                | 0.34267855 | 0.92365204 |   | 46.8                | 0.40788994 | 0.88323809 |   |
| 1.9                                                                                                                                    | 0.27446932 | 0.97304312 |   | 16.9                | 0.28942027 | 0.95470395 |   | 31.9                | 0.34314172 | 0.92346534 |   | 46.9                | 0.40740389 | 0.88326113 |   |
| 2                                                                                                                                      | 0.27006163 | 0.97285278 |   | 17                  | 0.2882014  | 0.95444173 |   | 32                  | 0.34296942 | 0.92309547 |   | 47                  | 0.40790395 | 0.88275901 |   |
| 2.1                                                                                                                                    | 0.26812261 | 0.97281316 |   | 17.1                | 0.28836881 | 0.95409014 |   | 32.1                | 0.34216882 | 0.92277629 |   | 47.1                | 0.40776437 | 0.88247278 |   |
| 2.2                                                                                                                                    | 0.265511   | 0.97248147 |   | 17.2                | 0.28832046 | 0.95394831 |   | 32.2                | 0.34213625 | 0.92249262 |   | 47.2                | 0.40772328 | 0.88245469 |   |
| 2.3                                                                                                                                    | 0.2666337  | 0.97338609 |   | 17.3                | 0.28814658 | 0.95386029 |   | 32.3                | 0.34020628 | 0.92246534 |   | 47.3                | 0.40740389 | 0.88245573 |   |
| 2.4                                                                                                                                    | 0.26697079 | 0.97235545 |   | 17.4                | 0.28673238 | 0.95334486 |   | 32.4                | 0.34051751 | 0.92159726 |   | 47.4                | 0.4101774  | 0.88213972 |   |
| 2.5                                                                                                                                    | 0.26812836 | 0.97227737 |   | 17.5                | 0.2877117  | 0.95323691 |   | 32.5                | 0.34063173 | 0.92145338 |   | 47.5                | 0.41111391 | 0.88202582 |   |
| 2.6                                                                                                                                    | 0.26807176 | 0.97233886 |   | 17.6                | 0.28614915 | 0.95299094 |   | 32.6                | 0.33996385 | 0.92081422 |   | 47.6                | 0.41098081 | 0.88176706 |   |
| 2.7                                                                                                                                    | 0.27112289 | 0.97216527 |   | 17.7                | 0.28474787 | 0.95269047 |   | 32.7                | 0.3397811  | 0.92064637 |   | 47.7                | 0.41122618 | 0.88179301 |   |
| 2.8                                                                                                                                    | 0.2691376  | 0.97207322 |   | 17.8                | 0.28602625 | 0.95239235 |   | 32.8                | 0.34031968 | 0.92025212 |   | 47.8                | 0.41302618 | 0.88161036 |   |
| 2.9                                                                                                                                    | 0.26962206 | 0.97192977 |   | 17.9                | 0.28687032 | 0.95216675 |   | 32.9                | 0.33970464 | 0.9194638  |   | 47.9                | 0.41436056 | 0.88160656 |   |
| 3                                                                                                                                      | 0.26974654 | 0.97196425 |   | 18                  | 0.28666424 | 0.95198244 |   | 33                  | 0.34090093 | 0.91913711 |   | 48                  | 0.41469727 | 0.88148522 |   |
| 3.1                                                                                                                                    | 0.27117777 | 0.97194477 |   | 18.1                | 0.28705087 | 0.95178608 |   | 33.1                | 0.34184411 | 0.91833833 |   | 48.1                | 0.41524267 | 0.88142687 |   |
| 3.2                                                                                                                                    | 0.26977639 | 0.97190052 |   | 18.2                | 0.28496717 | 0.95119174 |   | 33.2                | 0.341527   | 0.9179365  |   | 48.2                | 0.41438883 | 0.88126204 |   |
| 3.3                                                                                                                                    | 0.26953821 | 0.97187805 |   | 18.3                | 0.28501225 | 0.95084349 |   | 33.3                | 0.34148862 | 0.91772497 |   | 48.3                | 0.4150024  | 0.88094998 |   |
| 3.4                                                                                                                                    | 0.27018234 | 0.97182639 |   | 18.4                | 0.28302825 | 0.95042039 |   | 33.4                | 0.34181147 | 0.91719969 |   | 48.4                | 0.41484246 | 0.88079395 |   |
| 3.5                                                                                                                                    | 0.27007382 | 0.97176017 |   | 18.5                | 0.28220378 | 0.95039949 |   | 33.5                | 0.34144172 | 0.91671212 |   | 48.5                | 0.41476041 | 0.88073624 |   |
| 3.6                                                                                                                                    | 0.27338777 | 0.97165029 |   | 18.6                | 0.28387667 | 0.95021925 |   | 33.6                | 0.34183049 | 0.91633736 |   | 48.6                | 0.41515402 | 0.88063148 |   |
| 3.7                                                                                                                                    | 0.27338777 | 0.97165029 |   | 18.7                | 0.28482406 | 0.95011065 |   | 33.7                | 0.34268695 | 0.91594498 |   | 48.7                | 0.41435766 | 0.88012459 |   |
| 3.8                                                                                                                                    | 0.27406102 | 0.97163841 |   | 18.8                | 0.28483314 | 0.95002221 |   | 33.8                | 0.34235068 | 0.91571385 |   | 48.8                | 0.41522702 | 0.88001099 |   |
| 3.9                                                                                                                                    | 0.2753267  | 0.97159411 |   | 18.9                | 0.28448756 | 0.94977792 |   | 33.9                | 0.3445613  | 0.91554426 |   | 48.9                | 0.41527602 | 0.87998888 |   |
| 4                                                                                                                                      | 0.2742505  | 0.97151767 |   | 19                  | 0.28363459 | 0.94939727 |   | 34                  | 0.34565031 | 0.91505916 |   | 49                  | 0.41652666 | 0.879924   |   |
| 4.1                                                                                                                                    | 0.27669707 | 0.97141693 |   | 19.1                | 0.28228787 | 0.94910656 |   | 34.1                | 0.34684799 | 0.91463859 |   | 49.1                | 0.41691718 | 0.87988221 |   |
| 4.2                                                                                                                                    | 0.27788875 | 0.97129839 |   | 19.2                | 0.28304988 | 0.94903198 |   | 34.2                | 0.34724891 | 0.91423274 |   | 49.2                | 0.41720301 | 0.87985809 |   |
| 4.3                                                                                                                                    | 0.2778353  | 0.97128602 |   | 19.3                | 0.28358743 | 0.94888083 |   | 34.3                | 0.34710099 | 0.91376966 |   | 49.3                | 0.41756042 | 0.87983196 |   |
| 4.4                                                                                                                                    | 0.27780932 | 0.97122128 |   | 19.4                | 0.28110043 | 0.94867055 |   | 34.4                | 0.34841734 | 0.91331725 |   | 49.4                | 0.4184266  | 0.87949846 |   |
| 4.5                                                                                                                                    | 0.27818155 | 0.97109614 |   | 19.5                | 0.28109432 | 0.94831624 |   | 34.5                | 0.34868759 | 0.91301776 |   | 49.5                | 0.41874018 | 0.87929294 |   |
| 4.6                                                                                                                                    | 0.27847451 | 0.9709436  |   | 19.6                | 0.27958203 | 0.94802197 |   | 34.6                | 0.34823177 | 0.91268582 |   | 49.6                | 0.41901418 | 0.87898269 |   |
| 4.7                                                                                                                                    | 0.2785775  | 0.97092728 |   | 19.7                | 0.28036119 | 0.94769852 |   | 34.7                | 0.34748265 | 0.91247238 |   | 49.7                | 0.4195888  | 0.87853196 |   |
| 4.8                                                                                                                                    | 0.27827507 | 0.97078943 |   | 19.8                | 0.28042357 | 0.94749184 |   | 34.8                | 0.34880511 | 0.91229988 |   | 49.8                | 0.42097486 | 0.87852564 |   |
| 4.9                                                                                                                                    | 0.27748867 | 0.97073886 |   | 19.9                | 0.28322976 | 0.94765198 |   | 34.9                | 0.34997312 | 0.91219204 |   | 49.9                | 0.4208349  | 0.87828274 |   |
| 5                                                                                                                                      | 0.27751135 | 0.97057454 |   | 20                  | 0.28350498 | 0.94767738 |   | 35                  | 0.35074099 | 0.91196229 |   | 50                  | 0.42226273 | 0.87816765 |   |
| 5.1                                                                                                                                    | 0.27760384 | 0.97052693 |   | 20.1                | 0.28290714 | 0.94759189 |   | 35.1                | 0.35184172 | 0.91166917 |   | 50.1                | 0.42284651 | 0.87812644 |   |
| 5.2                                                                                                                                    | 0.27952391 | 0.97051059 |   | 20.2                | 0.28438064 | 0.94747854 |   | 35.2                | 0.35498434 | 0.9109913  |   | 50.2                | 0.4230646  | 0.87763345 |   |
| 5.3                                                                                                                                    | 0.27787449 | 0.97027825 |   | 20.3                | 0.28507433 | 0.94732847 |   | 35.3                | 0.35478362 | 0.91068097 |   | 50.3                | 0.42309925 | 0.87764693 |   |
| 5.4                                                                                                                                    | 0.27805861 | 0.97024459 |   | 20.4                | 0.28536975 | 0.94706286 |   | 35.4                | 0.35502693 | 0.91040943 |   | 50.4                | 0.42354786 | 0.87759391 |   |
| 5.5                                                                                                                                    | 0.27728986 | 0.97011115 |   | 20.5                | 0.28569912 | 0.94689294 |   | 35.5                | 0.35511042 | 0.91009706 |   | 50.5                | 0.42359032 | 0.87752644 |   |
| 5.6                                                                                                                                    | 0.27706326 | 0.97006462 |   | 20.6                | 0.28619853 | 0.94689915 |   | 35.6                | 0.35541167 | 0.90910448 |   | 50.6                | 0.42442686 | 0.87730275 |   |
| 5.7                                                                                                                                    | 0.2776897  | 0.97002758 |   | 20.7                | 0.28532325 | 0.94674989 |   | 35.7                | 0.35526556 | 0.90828485 |   | 50.7                | 0.42452302 | 0.87702813 |   |
| 5.8                                                                                                                                    | 0.27789596 | 0.96998621 |   | 20.8                | 0.2845921  | 0.94650044 |   | 35.8                | 0.35515029 | 0.90789005 |   | 50.8                | 0.42499327 | 0.87710849 |   |
| 5.9                                                                                                                                    | 0.28001622 | 0.96985167 |   | 20.9                | 0.28524389 | 0.94640944 |   | 35.9                | 0.35691099 | 0.90737946 |   | 50.9                | 0.42517601 | 0.87707947 |   |
| 6                                                                                                                                      | 0.28230433 | 0.96982619 |   | 21                  | 0.28635301 | 0.94606411 |   | 36                  | 0.35653503 | 0.90696197 |   | 51                  | 0.42594354 | 0.87652703 |   |
| 6.1                                                                                                                                    | 0.28409311 | 0.96977753 |   | 21.1                | 0.28786185 | 0.94564766 |   | 36.1                | 0.35616686 | 0.90669499 |   | 51.1                | 0.42639634 | 0.87623209 |   |
| 6.2                                                                                                                                    | 0.28383087 | 0.96970812 |   | 21.2                | 0.28739304 | 0.9454501  |   | 36.2                | 0.35621165 | 0.90642567 |   | 51.2                | 0.42638049 | 0.87609049 |   |
| 6.3                                                                                                                                    | 0.2826744  | 0.96964447 |   | 21.3                | 0.28975706 | 0.94529544 |   | 36.3                | 0.35653304 | 0.90620837 |   | 51.3                | 0.42675002 | 0.87596821 |   |
| 6.4                                                                                                                                    | 0.28241112 | 0.96960769 |   | 21.4                | 0.28978817 | 0.94514933 |   | 36.4                | 0.35693281 | 0.90586653 |   | 51.4                | 0.42832626 | 0.87585003 |   |
| 6.5                                                                                                                                    | 0.28311866 | 0.96949278 |   | 21.5                | 0.29227046 | 0.9449386  |   | 36.5                | 0.35646127 | 0.90538197 |   | 51.5                | 0.42575329 | 0.87541053 |   |
| 6.6                                                                                                                                    | 0.28488414 | 0.96931882 |   | 21.6                | 0.29275017 | 0.94490198 |   | 36.6                | 0.35817776 | 0.90491016 |   | 51.6                | 0.42562002 | 0.87533681 |   |
| 6.7                                                                                                                                    | 0.28379416 | 0.96913787 |   | 21.7                | 0.29276262 | 0.94485855 |   | 36.7                | 0.35870414 | 0.90473946 |   | 51.7                | 0.42513515 | 0.87507497 |   |
| 6.8                                                                                                                                    | 0.28561237 | 0.96882633 |   | 21.8                | 0.29256233 | 0.94454582 |   | 36.8                | 0.35776417 | 0.90367872 |   | 51.8                | 0.42517831 | 0.87490363 |   |
| 6.9                                                                                                                                    | 0.2855334  | 0.96853704 |   |                     |            |            |   |                     |            |            |   |                     |            |            |   |

|      |            |            |      |            |            |      |            |            |       |            |             |
|------|------------|------------|------|------------|------------|------|------------|------------|-------|------------|-------------|
| 12.1 | 0.29146547 | 0.06150202 | 27.1 | 0.31095896 | 0.93546014 | 47.0 | 0.38683266 | 0.89209196 | 57.0  | 0.43437274 | 0.86363155  |
| 12.2 | 0.29003131 | 0.06136941 | 27.2 | 0.31261092 | 0.93539621 | 47.1 | 0.3887039  | 0.89183043 | 57.1  | 0.43388375 | 0.86350372  |
| 12.3 | 0.2867006  | 0.06095661 | 27.3 | 0.31272881 | 0.93534479 | 47.2 | 0.38883653 | 0.89141058 | 57.2  | 0.43435042 | 0.86331586  |
| 12.4 | 0.28628313 | 0.0607768  | 27.4 | 0.31419158 | 0.93518325 | 47.3 | 0.38961853 | 0.89115556 | 57.3  | 0.43487794 | 0.8631      |
| 12.5 | 0.2863951  | 0.06049943 | 27.5 | 0.31336496 | 0.93499983 | 47.4 | 0.38999844 | 0.89084204 | 57.4  | 0.43539246 | 0.86304415  |
| 12.6 | 0.28595842 | 0.06032572 | 27.6 | 0.31418076 | 0.93472854 | 47.5 | 0.39016314 | 0.89064777 | 57.5  | 0.43598696 | 0.86277793  |
| 12.7 | 0.28602279 | 0.0602096  | 27.7 | 0.31515748 | 0.93410634 | 47.6 | 0.39182007 | 0.89037925 | 57.6  | 0.43553682 | 0.8625866   |
| 12.8 | 0.28624495 | 0.05993002 | 27.8 | 0.31382137 | 0.93372476 | 47.7 | 0.39243159 | 0.89015678 | 57.7  | 0.43635808 | 0.8621865   |
| 12.9 | 0.28455707 | 0.05972979 | 27.9 | 0.3137681  | 0.93344644 | 47.8 | 0.39278085 | 0.88987825 | 57.8  | 0.4360921  | 0.8620358   |
| 13.0 | 0.28324496 | 0.05955493 | 27.9 | 0.31523919 | 0.93305006 | 47.9 | 0.3937441  | 0.88957623 | 57.9  | 0.43660407 | 0.86184753  |
| 13.1 | 0.28287309 | 0.05948241 | 28.0 | 0.31444082 | 0.93280672 | 48.0 | 0.39405484 | 0.88932315 | 58.0  | 0.43825612 | 0.86195175  |
| 13.2 | 0.28406666 | 0.05929474 | 28.1 | 0.31405458 | 0.93255279 | 48.1 | 0.39356481 | 0.8891396  | 58.1  | 0.43847589 | 0.86181819  |
| 13.3 | 0.28381642 | 0.05905812 | 28.2 | 0.31524746 | 0.93227698 | 48.2 | 0.39419211 | 0.88885022 | 58.2  | 0.43885043 | 0.86175061  |
| 13.4 | 0.2819947  | 0.05887742 | 28.3 | 0.31520184 | 0.93197413 | 48.3 | 0.39493479 | 0.88870832 | 58.3  | 0.43941904 | 0.86139774  |
| 13.5 | 0.28080478 | 0.05883428 | 28.4 | 0.31492504 | 0.93183988 | 48.4 | 0.39519228 | 0.88843306 | 58.4  | 0.4394489  | 0.86123371  |
| 13.6 | 0.28087253 | 0.05867924 | 28.5 | 0.31629517 | 0.93107689 | 48.5 | 0.39543397 | 0.88804325 | 58.5  | 0.43900542 | 0.86092298  |
| 13.7 | 0.28203069 | 0.05851571 | 28.6 | 0.31760239 | 0.93091016 | 48.6 | 0.39613904 | 0.88767708 | 58.6  | 0.43915626 | 0.86051596  |
| 13.8 | 0.28320112 | 0.05833992 | 28.7 | 0.3179599  | 0.93060282 | 48.7 | 0.39652183 | 0.88719787 | 58.7  | 0.43985463 | 0.86025427  |
| 13.9 | 0.28253997 | 0.05811606 | 28.8 | 0.31848413 | 0.93043365 | 48.8 | 0.39705193 | 0.88704667 | 58.8  | 0.43979921 | 0.86006437  |
| 14.0 | 0.28142188 | 0.05794188 | 28.9 | 0.32038527 | 0.93027664 | 48.9 | 0.39760963 | 0.88676174 | 58.9  | 0.4392389  | 0.859853875 |
| 14.1 | 0.28100131 | 0.05784717 | 29.0 | 0.32178947 | 0.93028104 | 49.0 | 0.39809784 | 0.88658623 | 59.0  | 0.43968661 | 0.85948799  |
| 14.2 | 0.28078908 | 0.05769235 | 29.1 | 0.32312667 | 0.93010415 | 49.1 | 0.39872792 | 0.88640497 | 59.1  | 0.43947399 | 0.859238783 |
| 14.3 | 0.28045384 | 0.05752221 | 29.2 | 0.32528491 | 0.92976908 | 49.2 | 0.3988438  | 0.88600084 | 59.2  | 0.43957756 | 0.85923698  |
| 14.4 | 0.27920554 | 0.05739694 | 29.3 | 0.32499776 | 0.92951621 | 49.3 | 0.39863324 | 0.8857076  | 59.3  | 0.43988814 | 0.85906241  |
| 14.5 | 0.28025163 | 0.05731562 | 29.4 | 0.32679933 | 0.92928767 | 49.4 | 0.39893389 | 0.88566382 | 59.4  | 0.43981137 | 0.85885841  |
| 14.6 | 0.2813448  | 0.05731335 | 29.5 | 0.32731743 | 0.92905322 | 49.5 | 0.39946567 | 0.88567063 | 59.5  | 0.44010328 | 0.85879352  |
| 14.7 | 0.2807653  | 0.05720714 | 29.6 | 0.32780447 | 0.92893016 | 49.6 | 0.40007652 | 0.88563598 | 59.6  | 0.44135908 | 0.8585104   |
| 14.8 | 0.2796724  | 0.05703454 | 29.7 | 0.32815252 | 0.92866651 | 49.7 | 0.40030353 | 0.88564499 | 59.7  | 0.4415168  | 0.85837072  |
| 14.9 | 0.27774183 | 0.05692308 | 29.8 | 0.33026002 | 0.92849232 | 49.8 | 0.40033626 | 0.88551599 | 59.8  | 0.44164437 | 0.8583831   |
| 15.0 | 0.2782418  | 0.05672452 | 29.9 | 0.33208456 | 0.92850528 | 49.9 | 0.40037345 | 0.88552137 | 59.9  | 0.44227147 | 0.85832406  |
| 60.1 | 0.04430078 | 0.85785629 | 75.1 | 0.49276937 | 0.81014435 | 90.0 | 0.50456702 | 0.75388195 | 105.0 | 0.51431501 | 0.73821112  |
| 60.2 | 0.44292431 | 0.85785231 | 75.2 | 0.49322649 | 0.80979851 | 90.1 | 0.50497861 | 0.75374007 | 105.1 | 0.51383884 | 0.73795115  |
| 60.3 | 0.44262671 | 0.85732449 | 75.3 | 0.49341126 | 0.80952889 | 90.2 | 0.50519552 | 0.75345422 | 105.2 | 0.51379543 | 0.73789882  |
| 60.4 | 0.44303969 | 0.85714723 | 75.4 | 0.49364002 | 0.80877973 | 90.3 | 0.50528135 | 0.75317079 | 105.3 | 0.51388388 | 0.73784275  |
| 60.5 | 0.44243472 | 0.8567385  | 75.5 | 0.49381227 | 0.80855514 | 90.4 | 0.50528135 | 0.75317079 | 105.4 | 0.51407909 | 0.73765602  |
| 60.6 | 0.44304993 | 0.85656439 | 75.6 | 0.49381227 | 0.80855514 | 90.5 | 0.50528135 | 0.75317079 | 105.5 | 0.51414401 | 0.73756448  |
| 60.7 | 0.44354893 | 0.85649109 | 75.7 | 0.49405268 | 0.80813058 | 90.6 | 0.50582809 | 0.75323248 | 105.6 | 0.51414401 | 0.73756448  |
| 60.8 | 0.44319718 | 0.85614844 | 75.8 | 0.49434578 | 0.80793056 | 90.7 | 0.50594055 | 0.75309268 | 105.7 | 0.51414401 | 0.73756448  |
| 60.9 | 0.44250415 | 0.8561088  | 75.9 | 0.49429865 | 0.807533   | 90.8 | 0.5062857  | 0.75303493 | 105.8 | 0.51414715 | 0.7373376   |
| 61.0 | 0.4423616  | 0.8552679  | 76.0 | 0.49492375 | 0.80743832 | 90.9 | 0.50660722 | 0.75301517 | 105.9 | 0.51412879 | 0.73720899  |
| 61.1 | 0.44253222 | 0.85471173 | 76.1 | 0.49475062 | 0.80689833 | 91.0 | 0.50640627 | 0.75291268 | 106.0 | 0.51413087 | 0.73720899  |
| 61.2 | 0.44307334 | 0.85458962 | 76.2 | 0.49484743 | 0.80676059 | 91.1 | 0.50714242 | 0.75300229 | 106.1 | 0.51389865 | 0.73712794  |
| 61.3 | 0.44318962 | 0.85415654 | 76.3 | 0.49487485 | 0.80653455 | 91.2 | 0.50714242 | 0.75300229 | 106.2 | 0.51389865 | 0.73712794  |
| 61.4 | 0.44347198 | 0.85403188 | 76.4 | 0.49487485 | 0.80653455 | 91.3 | 0.50731883 | 0.75298153 | 106.3 | 0.51352408 | 0.73687531  |
| 61.5 | 0.44392515 | 0.85386883 | 76.5 | 0.49500711 | 0.80600436 | 91.4 | 0.50778996 | 0.7528633  | 106.4 | 0.51380074 | 0.73665339  |
| 61.6 | 0.44356557 | 0.85363477 | 76.6 | 0.49544754 | 0.80565766 | 91.5 | 0.50786483 | 0.75290592 | 106.5 | 0.51312395 | 0.73659066  |
| 61.7 | 0.44408976 | 0.85353414 | 76.7 | 0.49559764 | 0.80550372 | 91.6 | 0.50774767 | 0.75261351 | 106.6 | 0.51269112 | 0.73653231  |
| 61.8 | 0.44560406 | 0.85317346 | 76.8 | 0.49653992 | 0.80499993 | 91.7 | 0.50763927 | 0.75251744 | 106.7 | 0.51172536 | 0.7348723   |
| 61.9 | 0.44553011 | 0.85279717 | 76.9 | 0.49655535 | 0.80465009 | 91.8 | 0.50763927 | 0.75251744 | 106.8 | 0.51210385 | 0.73493225  |
| 62.0 | 0.44647896 | 0.85265804 | 77.0 | 0.49641776 | 0.80400306 | 91.9 | 0.50775391 | 0.75236457 | 106.9 | 0.51180074 | 0.73467636  |
| 62.1 | 0.44608513 | 0.85252152 | 77.1 | 0.49647314 | 0.80374978 | 92.0 | 0.50813939 | 0.75207998 | 107.0 | 0.51182413 | 0.73450758  |
| 62.2 | 0.44750414 | 0.85201718 | 77.2 | 0.49639328 | 0.80362145 | 92.1 | 0.50841549 | 0.75203093 | 107.1 | 0.51129955 | 0.73395971  |
| 62.3 | 0.44715588 | 0.85153392 | 77.3 | 0.49639328 | 0.80362145 | 92.2 | 0.50874164 | 0.75213759 | 107.2 | 0.51129955 | 0.73395971  |
| 62.4 | 0.44746163 | 0.85127736 | 77.4 | 0.49689856 | 0.80343603 | 92.3 | 0.50913387 | 0.75210975 | 107.3 | 0.51140576 | 0.73395085  |
| 62.5 | 0.44796712 | 0.85064764 | 77.5 | 0.49691033 | 0.803384   | 92.4 | 0.50928506 | 0.75186225 | 107.4 | 0.51129955 | 0.73395085  |
| 62.6 | 0.44798873 | 0.85025867 | 77.6 | 0.49697974 | 0.80331968 | 92.5 | 0.50946144 | 0.75181968 | 107.5 | 0.51142217 | 0.73372021  |
| 62.7 | 0.44770374 | 0.84991383 | 77.7 | 0.49753374 | 0.80293889 | 92.6 | 0.50930523 | 0.7516695  | 107.6 | 0.51144237 | 0.73373281  |
| 62.8 | 0.44798432 | 0.84854322 | 77.8 | 0.49804317 | 0.80279415 | 92.7 | 0.50930523 | 0.7516695  | 107.7 | 0.51138968 | 0.73364409  |
| 62.9 | 0.44816232 | 0.84763195 | 77.9 | 0.49824823 | 0.8022858  | 92.8 | 0.50982894 | 0.75145347 | 107.8 | 0.51147578 | 0.73321039  |
| 63.0 | 0.44856076 | 0.84726434 | 78.0 | 0.49831758 | 0.80185593 | 92.9 | 0.50982894 | 0.75145347 | 107.9 | 0.5114976  | 0.73325765  |
| 63.1 | 0.4489813  | 0.84696025 | 78.1 | 0.49797147 | 0.80153509 | 93.0 | 0.51010742 | 0.75144998 | 108.0 | 0.51109998 | 0.73295231  |
| 63.2 | 0.44981389 | 0.84638857 | 78.2 | 0.49765237 | 0.80105061 | 93.1 | 0.51034394 | 0.75141572 | 108.1 | 0.51109998 | 0.73295231  |
| 63.3 | 0.45060942 | 0.84630266 | 78.3 | 0.49740011 | 0.80034824 | 93.2 | 0.51050297 | 0.75132915 | 108.2 | 0.51132793 | 0.73292076  |
| 63.4 | 0.45161333 | 0.84615345 | 78.4 | 0.4978471  | 0.79995058 | 93.3 | 0.51079436 | 0.75129249 | 108.3 | 0.51143319 | 0.73270165  |
| 63.5 | 0.45218065 | 0.84566825 | 78.5 | 0.49841567 | 0.79992105 | 93.4 | 0.51053535 | 0.75091371 | 108.4 | 0.51143808 | 0.73259456  |
| 63.6 | 0.45250561 | 0.84540681 | 78.6 | 0.49842615 | 0.79935017 | 93.5 | 0.51026716 | 0.75070366 | 108.5 | 0.51168575 | 0.73235081  |
| 63.7 | 0.45373706 | 0.84529725 | 78.7 | 0.4984565  | 0.79885597 | 93.6 | 0.5114582  | 0.75035167 | 108.6 | 0.5117882  | 0.73225706  |
| 63.8 | 0.45411265 | 0.84523699 | 78.8 | 0.49869127 | 0.79864457 | 93.7 | 0.51169628 | 0.75030706 | 108.7 | 0.51190867 | 0.732356    |
| 63.9 | 0.45440564 | 0.8449712  | 78.9 | 0.49882357 | 0.7980902  | 93.8 | 0.51208989 | 0.75032095 | 108.8 | 0.51182174 | 0.73195392  |
| 64.0 | 0.45435885 | 0.84470866 | 79.0 | 0.49844785 | 0.79791183 | 93.9 | 0.5127399  | 0.75020218 | 108.9 | 0.51199277 | 0.73177539  |
| 64.1 | 0.45513863 | 0.84432903 | 79.1 | 0.49870719 | 0.79771758 | 94.0 | 0.5127399  | 0.75020218 | 109.0 | 0.51199277 | 0.73177539  |
| 64.2 | 0.45664462 | 0.84353458 | 79.2 | 0.49865517 | 0.7970899  | 94.1 | 0.5126706  | 0.74995406 | 109.1 | 0.51152324 | 0.73169141  |
| 64.3 | 0.45686273 | 0.84348864 | 79.3 | 0.4987676  | 0.79634356 | 94.2 | 0.51293766 | 0.74993249 | 109.2 | 0.51135435 | 0.73133528  |
| 64.4 | 0.45746185 | 0.84344602 | 79.4 | 0.49842526 | 0.79553981 | 94.3 | 0.5124481  | 0.74960348 | 109.3 | 0.51139351 | 0.73132428  |
| 64.5 | 0.45830206 | 0.84314896 | 79.5 | 0.4983083  | 0.79443959 | 94.4 | 0.51270761 | 0.74942222 | 109.4 | 0.51139351 | 0.73132428  |
| 64.6 | 0.45907496 | 0.84313428 | 79.6 | 0.49834655 | 0.79393321 | 94.5 | 0.5121292  | 0.74930321 | 109.5 | 0.5116993  | 0.73127225  |
| 64.7 | 0.45958002 | 0.84305356 | 79.7 | 0.49860139 | 0.79372512 | 94.6 | 0.51291676 | 0.74930223 | 10    |            |             |

|       |            |            |       |             |            |       |            |            |       |            |             |
|-------|------------|------------|-------|-------------|------------|-------|------------|------------|-------|------------|-------------|
| 69.2  | 0.48171274 | 0.83080219 | 84.2  | 0.49762246  | 0.77294882 | 99.2  | 0.51503359 | 0.74336667 | 114.2 | 0.51532913 | 0.72718919  |
| 69.3  | 0.48171655 | 0.83024254 | 84.3  | 0.49788684  | 0.77286745 | 99.3  | 0.51509137 | 0.74321836 | 114.3 | 0.51532913 | 0.72718919  |
| 69.4  | 0.48212657 | 0.83062471 | 84.4  | 0.49833543  | 0.77255656 | 99.4  | 0.51513429 | 0.74284081 | 114.4 | 0.51532913 | 0.72718919  |
| 69.5  | 0.4822991  | 0.82954679 | 84.5  | 0.49791863  | 0.77229543 | 99.5  | 0.51538829 | 0.74284881 | 114.5 | 0.51581657 | 0.72746335  |
| 69.6  | 0.48251045 | 0.82935956 | 84.6  | 0.49761001  | 0.77145666 | 99.6  | 0.51505756 | 0.74278111 | 114.6 | 0.51591165 | 0.72741666  |
| 69.7  | 0.48264265 | 0.82932029 | 84.7  | 0.49814166  | 0.77107077 | 99.7  | 0.51499585 | 0.74204544 | 114.7 | 0.51591165 | 0.72741666  |
| 69.8  | 0.48296083 | 0.82920617 | 84.8  | 0.49856548  | 0.77022232 | 99.8  | 0.51502194 | 0.74141926 | 114.8 | 0.51583847 | 0.72687749  |
| 69.9  | 0.48316451 | 0.82879214 | 84.9  | 0.49822023  | 0.76975347 | 99.9  | 0.51536929 | 0.74126096 | 114.9 | 0.51610942 | 0.72689055  |
| 70    | 0.48368748 | 0.82865972 | 85    | 0.49815048  | 0.76956378 | 100   | 0.51536929 | 0.74126096 | 115   | 0.51638568 | 0.72658851  |
| 70.1  | 0.48395679 | 0.8280549  | 85.1  | 0.49878463  | 0.76932454 | 100.1 | 0.51542896 | 0.74104548 | 115.1 | 0.51666679 | 0.72650374  |
| 70.2  | 0.48387002 | 0.82774253 | 85.2  | 0.49901967  | 0.76889669 | 100.2 | 0.51542896 | 0.74104548 | 115.2 | 0.51666679 | 0.72650374  |
| 70.3  | 0.48421509 | 0.82743634 | 85.3  | 0.49904598  | 0.76833608 | 100.3 | 0.51492914 | 0.74028764 | 115.3 | 0.51698638 | 0.72658861  |
| 70.4  | 0.48466996 | 0.82722225 | 85.4  | 0.49916167  | 0.76790327 | 100.4 | 0.51500665 | 0.74032438 | 115.4 | 0.51711744 | 0.72657521  |
| 70.5  | 0.48547883 | 0.82642178 | 85.5  | 0.49899549  | 0.76739478 | 100.5 | 0.51500665 | 0.74032438 | 115.5 | 0.51734981 | 0.72644388  |
| 70.6  | 0.48551354 | 0.826213   | 85.6  | 0.49956752  | 0.76734657 | 100.6 | 0.51500665 | 0.74032438 | 115.6 | 0.51770356 | 0.72650216  |
| 70.7  | 0.48553938 | 0.82587463 | 85.7  | 0.49959049  | 0.76681951 | 100.7 | 0.51499086 | 0.73989297 | 115.7 | 0.51779548 | 0.72617719  |
| 70.8  | 0.48546121 | 0.82570091 | 85.8  | 0.49949699  | 0.76627185 | 100.8 | 0.51477238 | 0.73973928 | 115.8 | 0.51789192 | 0.72609345  |
| 70.9  | 0.48518479 | 0.82497753 | 85.9  | 0.499235    | 0.76521092 | 100.9 | 0.51477238 | 0.73973928 | 115.9 | 0.51845664 | 0.72611932  |
| 71    | 0.48523735 | 0.82487854 | 86    | 0.4994204   | 0.76457467 | 101   | 0.5151585  | 0.73985799 | 116   | 0.51845664 | 0.72611932  |
| 71.1  | 0.48559103 | 0.82442734 | 86.1  | 0.50016199  | 0.7642013  | 101.1 | 0.5151585  | 0.73985799 | 116.1 | 0.51845664 | 0.72611932  |
| 71.2  | 0.48574882 | 0.82402603 | 86.2  | 0.49974774  | 0.76353418 | 101.2 | 0.51525753 | 0.73995899 | 116.2 | 0.51839047 | 0.72611558  |
| 71.3  | 0.48606199 | 0.82370715 | 86.3  | 0.50019259  | 0.76330495 | 101.3 | 0.5155778  | 0.73989639 | 116.3 | 0.51839047 | 0.72611558  |
| 71.4  | 0.48636977 | 0.82348619 | 86.4  | 0.50033963  | 0.76299513 | 101.4 | 0.5155778  | 0.73989639 | 116.4 | 0.51840618 | 0.72589874  |
| 71.5  | 0.4862058  | 0.82311485 | 86.5  | 0.50073199  | 0.76281941 | 101.5 | 0.5155778  | 0.73989639 | 116.5 | 0.51858414 | 0.72588749  |
| 71.6  | 0.48639161 | 0.8229831  | 86.6  | 0.50054515  | 0.76211991 | 101.6 | 0.5155778  | 0.73989639 | 116.6 | 0.51848724 | 0.72572212  |
| 71.7  | 0.48682502 | 0.82257634 | 86.7  | 0.50021963  | 0.76161663 | 101.7 | 0.5155778  | 0.73989639 | 116.7 | 0.51878943 | 0.72581031  |
| 71.8  | 0.48698913 | 0.82235101 | 86.8  | 0.50065718  | 0.76195476 | 101.8 | 0.51582888 | 0.73994653 | 116.8 | 0.51935641 | 0.72612354  |
| 71.9  | 0.48650631 | 0.82216449 | 86.9  | 0.50061585  | 0.76164668 | 101.9 | 0.51582888 | 0.73994653 | 116.9 | 0.51935641 | 0.72612354  |
| 72    | 0.48712233 | 0.82183113 | 87    | 0.50091108  | 0.76165541 | 102   | 0.51582888 | 0.73994653 | 117   | 0.51953301 | 0.72587663  |
| 72.1  | 0.48715756 | 0.82143355 | 87.1  | 0.50081769  | 0.76153243 | 102.1 | 0.51593661 | 0.73990401 | 117.1 | 0.51972906 | 0.72574682  |
| 72.2  | 0.48722094 | 0.82107197 | 87.2  | 0.5014453   | 0.76114769 | 102.2 | 0.51593661 | 0.73990401 | 117.2 | 0.51972906 | 0.72574682  |
| 72.3  | 0.48748172 | 0.82066996 | 87.3  | 0.50207034  | 0.7610012  | 102.3 | 0.51607772 | 0.73989023 | 117.3 | 0.51978089 | 0.72568798  |
| 72.4  | 0.48782883 | 0.82062669 | 87.4  | 0.50207034  | 0.7610012  | 102.4 | 0.51555562 | 0.73970655 | 117.4 | 0.51978089 | 0.72568798  |
| 72.5  | 0.48795869 | 0.8203033  | 87.5  | 0.5020922   | 0.76086067 | 102.5 | 0.51547421 | 0.73969522 | 117.5 | 0.51966539 | 0.72554427  |
| 72.6  | 0.48828225 | 0.8199751  | 87.6  | 0.50253581  | 0.76057677 | 102.6 | 0.51567898 | 0.73972446 | 117.6 | 0.51988079 | 0.72539528  |
| 72.7  | 0.48874739 | 0.81949796 | 87.7  | 0.50252477  | 0.7604048  | 102.7 | 0.51567898 | 0.73972446 | 117.7 | 0.51996794 | 0.72516645  |
| 72.8  | 0.48882525 | 0.819321   | 87.8  | 0.50212767  | 0.75943596 | 102.8 | 0.51577957 | 0.73969464 | 117.8 | 0.52016907 | 0.72512396  |
| 72.9  | 0.48915334 | 0.81897579 | 87.9  | 0.50257293  | 0.75906113 | 102.9 | 0.51577957 | 0.73969464 | 117.9 | 0.52013958 | 0.72512396  |
| 73    | 0.48884358 | 0.81849583 | 88    | 0.50253386  | 0.75855024 | 103   | 0.51577957 | 0.73969464 | 118   | 0.52027462 | 0.72500183  |
| 73.1  | 0.48884358 | 0.81849583 | 88.1  | 0.50276226  | 0.75826505 | 103.1 | 0.51597111 | 0.73966333 | 118.1 | 0.52027462 | 0.72500183  |
| 73.2  | 0.48917298 | 0.81813392 | 88.2  | 0.50247328  | 0.75779872 | 103.2 | 0.51608516 | 0.73967087 | 118.2 | 0.5203552  | 0.7249531   |
| 73.3  | 0.48966471 | 0.81746306 | 88.3  | 0.50254531  | 0.75787385 | 103.3 | 0.51595144 | 0.73950106 | 118.3 | 0.52044072 | 0.72485165  |
| 73.4  | 0.48984302 | 0.81682401 | 88.4  | 0.50277004  | 0.75767876 | 103.4 | 0.51608516 | 0.73950106 | 118.4 | 0.52080867 | 0.72471983  |
| 73.5  | 0.49007688 | 0.81644041 | 88.5  | 0.50349391  | 0.75727832 | 103.5 | 0.51531127 | 0.73926116 | 118.5 | 0.52087359 | 0.72459996  |
| 73.6  | 0.489722   | 0.81596687 | 88.6  | 0.50333339  | 0.75687385 | 103.6 | 0.51540151 | 0.73913048 | 118.6 | 0.52086248 | 0.72464439  |
| 73.7  | 0.49002393 | 0.81588854 | 88.7  | 0.50306213  | 0.75662355 | 103.7 | 0.51496528 | 0.73897201 | 118.7 | 0.52099663 | 0.72457496  |
| 73.8  | 0.49033075 | 0.81564091 | 88.8  | 0.50355773  | 0.75640665 | 103.8 | 0.51515914 | 0.73891223 | 118.8 | 0.52096405 | 0.72432447  |
| 73.9  | 0.49099301 | 0.81549314 | 88.9  | 0.5037554   | 0.75614792 | 103.9 | 0.51515914 | 0.73891223 | 118.9 | 0.52100515 | 0.72408231  |
| 74    | 0.49148345 | 0.81527996 | 89    | 0.50370393  | 0.75590401 | 104   | 0.51529267 | 0.73885806 | 119   | 0.52105539 | 0.72405911  |
| 74.1  | 0.49169922 | 0.81477557 | 89.1  | 0.50405331  | 0.75579953 | 104.1 | 0.51529267 | 0.73885806 | 119.1 | 0.52082233 | 0.7238873   |
| 74.2  | 0.4918676  | 0.81464805 | 89.2  | 0.50406704  | 0.75549334 | 104.2 | 0.51524702 | 0.73878947 | 119.2 | 0.52088885 | 0.72366036  |
| 74.3  | 0.49211745 | 0.8143846  | 89.3  | 0.50455333  | 0.75506655 | 104.3 | 0.51524702 | 0.73878947 | 119.3 | 0.52092825 | 0.72366036  |
| 74.4  | 0.49195674 | 0.81368718 | 89.4  | 0.5046426   | 0.7550596  | 104.4 | 0.5148158  | 0.7384662  | 119.4 | 0.52124787 | 0.72352499  |
| 74.5  | 0.49206112 | 0.81339845 | 89.5  | 0.50511228  | 0.75522956 | 104.5 | 0.5148158  | 0.7384662  | 119.5 | 0.52131791 | 0.72330584  |
| 74.6  | 0.49214234 | 0.81309409 | 89.6  | 0.50483553  | 0.75469315 | 104.6 | 0.51446513 | 0.73833404 | 119.6 | 0.52137709 | 0.72319063  |
| 74.7  | 0.49209801 | 0.81314701 | 89.7  | 0.50419598  | 0.75449429 | 104.7 | 0.51446513 | 0.73833404 | 119.7 | 0.5215381  | 0.72334517  |
| 74.8  | 0.49222693 | 0.81266988 | 89.8  | 0.50457663  | 0.75428549 | 104.8 | 0.51431053 | 0.73825491 | 119.8 | 0.52155176 | 0.72312598  |
| 74.9  | 0.49246047 | 0.81079998 | 89.9  | 0.50479952  | 0.75431333 | 104.9 | 0.51431053 | 0.73825491 | 119.9 | 0.5215412  | 0.72310608  |
| 120   | 0.52142344 | 0.72293145 | 135   | 0.52143898  | 0.68463008 | 150   | 0.51898126 | 0.66781178 | 165   | 0.52501523 | 0.66637317  |
| 120.1 | 0.52111973 | 0.72437391 | 135.1 | 0.52142986  | 0.68460885 | 150.1 | 0.51895871 | 0.66780535 | 165.1 | 0.52507581 | 0.66632211  |
| 120.2 | 0.52099954 | 0.72386192 | 135.2 | 0.52142720  | 0.68460404 | 150.2 | 0.51895871 | 0.66780535 | 165.2 | 0.52502071 | 0.66632244  |
| 120.3 | 0.52116584 | 0.72206037 | 135.3 | 0.52144414  | 0.68398166 | 150.3 | 0.51895871 | 0.66780535 | 165.3 | 0.52502071 | 0.66632244  |
| 120.4 | 0.52116584 | 0.72206037 | 135.4 | 0.52154891  | 0.6836573  | 150.4 | 0.51895871 | 0.66780535 | 165.4 | 0.52502071 | 0.66632244  |
| 120.5 | 0.52097357 | 0.72192054 | 135.5 | 0.52154298  | 0.68362057 | 150.5 | 0.51895871 | 0.66780535 | 165.5 | 0.52502071 | 0.66632244  |
| 120.6 | 0.52103038 | 0.72152882 | 135.6 | 0.52147029  | 0.68345034 | 150.6 | 0.51895871 | 0.66780535 | 165.6 | 0.52502071 | 0.66632244  |
| 120.7 | 0.52094257 | 0.72138846 | 135.7 | 0.52147029  | 0.68345034 | 150.7 | 0.51895871 | 0.66780535 | 165.7 | 0.52490214 | 0.66619878  |
| 120.8 | 0.52107389 | 0.72080712 | 135.8 | 0.52146698  | 0.68307632 | 150.8 | 0.51895871 | 0.66780535 | 165.8 | 0.52490214 | 0.66619878  |
| 120.9 | 0.5211705  | 0.72041787 | 135.9 | 0.52146203  | 0.68272282 | 150.9 | 0.51920831 | 0.66788277 | 165.9 | 0.52512481 | 0.66632167  |
| 121   | 0.52080901 | 0.72027982 | 136   | 0.521468739 | 0.68241741 | 151   | 0.51920831 | 0.66788277 | 166   | 0.52509751 | 0.666301136 |
| 121.1 | 0.52081247 | 0.72021234 | 136.1 | 0.521468739 | 0.68241741 | 151.1 | 0.51920831 | 0.66788277 | 166.1 | 0.52509751 | 0.666301136 |
| 121.2 | 0.52087684 | 0.71998927 | 136.2 | 0.52145603  | 0.68177514 | 151.2 | 0.51946089 | 0.66781115 | 166.2 | 0.52509751 | 0.666301136 |
| 121.3 | 0.5205416  | 0.71946756 | 136.3 | 0.521474099 | 0.68159375 | 151.3 | 0.51953214 | 0.66768534 | 166.3 | 0.52525077 | 0.66630229  |
| 121.4 | 0.52056238 | 0.71953993 | 136.4 | 0.52151805  | 0.68128576 | 151.4 | 0.51953214 | 0.66768534 | 166.4 | 0.52525077 | 0.66630229  |
| 121.5 | 0.52092318 | 0.7195648  | 136.5 | 0.52152484  | 0.68103191 | 151.5 | 0.51953214 | 0.66768534 | 166.5 | 0.52536924 | 0.66625383  |
| 121.6 | 0.52107682 | 0.71962539 | 136.6 | 0.52150876  | 0.68072078 | 151.6 | 0.51980123 | 0.66766629 | 166.6 | 0.52536924 | 0.66625383  |
| 121.7 | 0.52112406 | 0.71980927 | 136.7 | 0.521501801 | 0.68061562 | 151.7 | 0.52004732 | 0.66752189 | 166.7 | 0.52536924 | 0.66625383  |
| 121.8 | 0.5211418  | 0.71908991 | 136.8 | 0.52149259  | 0.68056981 | 151.8 | 0.52004732 |            |       |            |             |

126.4 0.52223848 0.71322738 141.4 0.51777637 0.67600402 156.4 0.52174047 0.66552283 171.4 0.5268466 0.66112762  
126.5 0.52245166 0.71305647 141.5 0.51777637 0.67600402 156.5 0.52174047 0.66552283 171.5 0.5268466 0.66112762  
126.6 0.52211219 0.71281893 141.6 0.51777637 0.67600402 156.6 0.52174047 0.66552283 171.6 0.52721886 0.66104048  
126.7 0.52211219 0.71281893 141.7 0.51777637 0.67600402 156.7 0.52174047 0.66552283 171.7 0.52721886 0.66104048  
126.8 0.52211219 0.71281893 141.8 0.51780791 0.67584588 156.8 0.52174047 0.66552283 171.8 0.52729938 0.66099171  
126.9 0.52191595 0.71252771 141.9 0.51779001 0.67573199 156.9 0.52174047 0.66552283 171.9 0.52729938 0.66099171  
127 0.52222343 0.71222849 142 0.51761272 0.67591909 157 0.52174047 0.66552283 172 0.52717636 0.66098883  
127.1 0.52292538 0.71190975 142.1 0.51763423 0.67535717 157.1 0.52174047 0.66552283 172.1 0.52717636 0.66098883  
127.2 0.52218556 0.71137734 142.2 0.51795959 0.67519572 157.2 0.52189164 0.66556485 172.2 0.52717636 0.66098883  
127.3 0.52231604 0.71134533 142.3 0.51795959 0.67519572 157.3 0.52189164 0.66556485 172.3 0.52717636 0.66098883  
127.4 0.52228675 0.71089249 142.4 0.51779319 0.67500216 157.4 0.52194219 0.66561173 172.4 0.52717636 0.66098883  
127.5 0.52237037 0.71064182 142.5 0.51779319 0.67500216 157.5 0.52207872 0.66554816 172.5 0.52717636 0.66098883  
127.6 0.52295993 0.71055469 142.6 0.51798301 0.67487515 157.6 0.52207872 0.66554816 172.6 0.52717636 0.66098883  
127.7 0.52224872 0.71055774 142.7 0.51798301 0.67487515 157.7 0.52207872 0.66554816 172.7 0.52717636 0.66098883  
127.8 0.52223089 0.71038327 142.8 0.51799398 0.67483323 157.8 0.52224961 0.66543402 172.8 0.52739135 0.66105875  
127.9 0.52223089 0.71038327 142.9 0.51799398 0.67483323 157.9 0.52224961 0.66543402 172.9 0.52761005 0.66116229  
128 0.52258086 0.71000131 143 0.51814323 0.67466116 158 0.5223833 0.66537569 173 0.52768715 0.66081075  
128.1 0.52252363 0.70981969 143.1 0.51814323 0.67466116 158.1 0.5223833 0.66537569 173.1 0.52787103 0.66092685  
128.2 0.522175 0.70936863 143.2 0.51814323 0.67466116 158.2 0.5223833 0.66537569 173.2 0.52787103 0.66092685  
128.3 0.52268848 0.70910621 143.3 0.51819897 0.67459583 158.3 0.5223833 0.66537569 173.3 0.52795404 0.66088393  
128.4 0.52257398 0.70877586 143.4 0.51840862 0.67456256 158.4 0.52217418 0.66515161 173.4 0.52825216 0.66038816  
128.5 0.52228606 0.7085654 143.5 0.51840862 0.67456256 158.5 0.5226066 0.66506303 173.5 0.52825387 0.66091145  
128.6 0.52249707 0.70854994 143.6 0.51831351 0.67441393 158.6 0.52220286 0.66491678 173.6 0.52829296 0.66080189  
128.7 0.52249707 0.70854994 143.7 0.51831351 0.67441393 158.7 0.52237939 0.66484575 173.7 0.5283986 0.66064277  
128.8 0.522259 0.70812057 143.8 0.5183166 0.67431376 158.8 0.52270571 0.6649817 173.8 0.5283986 0.66064277  
128.9 0.52222134 0.70815288 143.9 0.5183166 0.67431376 158.9 0.52270571 0.6649817 173.9 0.5283986 0.66064277  
129 0.52121668 0.70772641 144 0.51850004 0.67423779 159 0.52270571 0.6649817 174 0.5283986 0.66064277  
129.1 0.52200564 0.70761441 144.1 0.51846674 0.67402099 159.1 0.52270571 0.6649817 174.1 0.5283986 0.66064277  
129.2 0.52188546 0.70751477 144.2 0.51846674 0.67402099 159.2 0.52270571 0.6649817 174.2 0.5283986 0.66064277  
129.3 0.52158159 0.70706514 144.3 0.51837086 0.67379898 159.3 0.52270571 0.6649817 174.3 0.5283986 0.66064277  
129.4 0.52173172 0.70694475 144.4 0.51854437 0.67362944 159.4 0.52270571 0.6649817 174.4 0.5283986 0.66064277  
129.5 0.52173172 0.70694475 144.5 0.51854437 0.67362944 159.5 0.52270571 0.6649817 174.5 0.5283986 0.66064277  
129.6 0.52194021 0.70636166 144.6 0.51854437 0.67362944 159.6 0.52280362 0.66484191 174.6 0.5283986 0.66064277  
129.7 0.52195391 0.70619025 144.7 0.51854993 0.67359625 159.7 0.52280468 0.66463271 174.7 0.5283986 0.66064277  
129.8 0.52231297 0.70618029 144.8 0.51836279 0.6730301 159.8 0.52292136 0.66444931 174.8 0.52862126 0.66038816  
129.9 0.52220863 0.70599086 144.9 0.51834697 0.67298266 159.9 0.52320767 0.66453283 174.9 0.52862126 0.66038816  
130 0.52226399 0.70541993 145 0.51834697 0.67298266 160 0.52320767 0.66453283 175 0.52865764 0.66025222  
130.1 0.52171799 0.70518161 145.1 0.51834697 0.67298266 160.1 0.52320767 0.66453283 175.1 0.52865764 0.66025222  
130.2 0.52230781 0.70526118 145.2 0.51828903 0.67277417 160.2 0.523469 0.66465264 175.2 0.52862766 0.65996482  
130.3 0.52200424 0.70500414 145.3 0.51823256 0.67273819 160.3 0.523469 0.66465264 175.3 0.52862766 0.65996482  
130.4 0.52145088 0.70449669 145.4 0.51827253 0.67273888 160.4 0.523469 0.66465264 175.4 0.52862766 0.65996482  
130.5 0.52136389 0.70418722 145.5 0.51831837 0.67266888 160.5 0.523469 0.66465264 175.5 0.52862766 0.65996482  
130.6 0.52070547 0.70378666 145.6 0.51831837 0.67266888 160.6 0.523469 0.66465264 175.6 0.52862766 0.65996482  
130.7 0.52042754 0.70297471 145.7 0.51804194 0.67248998 160.7 0.523469 0.66465264 175.7 0.52862766 0.65996482  
130.8 0.52052802 0.70259064 145.8 0.5180398 0.67236745 160.8 0.52362709 0.66450614 175.8 0.52862766 0.65996482  
130.9 0.52032694 0.70216946 145.9 0.51796037 0.67222903 160.9 0.52362709 0.66450614 175.9 0.52862766 0.65996482  
131 0.52199379 0.70189923 146 0.51796584 0.67209511 161 0.52320767 0.66453283 176 0.52862766 0.65996482  
131.1 0.51979893 0.70124743 146.1 0.51821269 0.67150988 161.1 0.52359346 0.66442507 176.1 0.52862766 0.65996482  
131.2 0.51918095 0.70068859 146.2 0.51821775 0.67151456 161.2 0.52359346 0.66442507 176.2 0.52862766 0.65996482  
131.3 0.51889052 0.70047486 146.3 0.51787118 0.67107904 161.3 0.52359346 0.66442507 176.3 0.52862766 0.65996482  
131.4 0.51882227 0.69987425 146.4 0.51786449 0.67101124 161.4 0.52359346 0.66442507 176.4 0.52862766 0.65996482  
131.5 0.51826517 0.69927665 146.5 0.51795323 0.67050276 161.5 0.52374869 0.66433776 176.5 0.52862766 0.65996482  
131.6 0.51803355 0.69869129 146.6 0.51767204 0.67020185 161.6 0.52374869 0.66433776 176.6 0.52862766 0.65996482  
131.7 0.51794341 0.69822653 146.7 0.51740762 0.66988874 161.7 0.52374869 0.66433776 176.7 0.52862766 0.65996482  
131.8 0.51794341 0.69822653 146.8 0.51751205 0.66997981 161.8 0.52390798 0.66423327 176.8 0.52862766 0.65996482  
131.9 0.51833207 0.69819129 146.9 0.51736199 0.6697872 161.9 0.52390798 0.66423327 176.9 0.52862766 0.65996482  
132 0.51834036 0.69812055 147 0.51727667 0.66949279 162 0.52390798 0.66423327 177 0.52862766 0.65996482  
132.1 0.51867248 0.69817854 147.1 0.51761229 0.66915317 162.1 0.52390798 0.66423327 177.1 0.52862766 0.65996482  
132.2 0.51871238 0.69809641 147.2 0.51756376 0.66880905 162.2 0.52390798 0.66423327 177.2 0.52862766 0.65996482  
132.3 0.51845962 0.69775328 147.3 0.51750699 0.66845207 162.3 0.52413929 0.66415811 177.3 0.52901303 0.65991945  
132.4 0.5179429 0.69733126 147.4 0.51751734 0.66852013 162.4 0.52413929 0.66415811 177.4 0.52909476 0.65981228  
132.5 0.51750199 0.69661632 147.5 0.51777788 0.66815166 162.5 0.52413929 0.66415811 177.5 0.52909476 0.65981228  
132.6 0.5177335 0.69640183 147.6 0.51777788 0.66815166 162.6 0.52413929 0.66415811 177.6 0.52911301 0.65882597  
132.7 0.51740895 0.69605424 147.7 0.51757514 0.66818129 162.7 0.52413929 0.66415811 177.7 0.52927121 0.65855884  
132.8 0.51717325 0.69563811 147.8 0.5179631 0.66805987 162.8 0.52432234 0.66415312 177.8 0.52927121 0.65855884  
132.9 0.51898663 0.69469053 147.9 0.5179631 0.66805987 162.9 0.52432234 0.66415312 177.9 0.52949593 0.65833972  
133 0.51674344 0.69398464 148 0.51772727 0.66791667 163 0.52432234 0.66415312 178 0.52949593 0.65833972  
133.1 0.51646316 0.69355566 148.1 0.51772727 0.66791667 163.1 0.52423809 0.66389726 178.1 0.52941009 0.65820892  
133.2 0.51692524 0.6934131 148.2 0.51772727 0.66791667 163.2 0.52423809 0.66389726 178.2 0.52941009 0.65820892  
133.3 0.51639118 0.69278474 148.3 0.51772727 0.66791667 163.3 0.52423809 0.66389726 178.3 0.52941009 0.65820892  
133.4 0.51620828 0.6925787 148.4 0.51772727 0.66791667 163.4 0.52438666 0.66378623 178.4 0.52941009 0.65820892  
133.5 0.51607573 0.69195166 148.5 0.51772727 0.66791667 163.5 0.52438666 0.66378623 178.5 0.52941009 0.65820892  
133.6 0.51619496 0.69151606 148.6 0.51790652 0.66776056 163.6 0.52438666 0.66378623 178.6 0.52941009 0.65820892  
133.7 0.51617698 0.6908023 148.7 0.51790652 0.66776056 163.7 0.52460552 0.66373747 178.7 0.52941009 0.65820892  
133.8 0.51624241 0.69035004 148.8 0.51790652 0.66776056 163.8 0.52460552 0.66373747 178.8 0.52941009 0.65820892  
133.9 0.51608413 0.69014506 148.9 0.51790652 0.66776056 163.9 0.52460552 0.66373747 178.9 0.52952357 0.65820258  
134 0.51602066 0.68984048 149 0.51790652 0.66776056 164 0.52498298 0.66330029 179 0.52952357 0.65820258  
134.1 0.51645684 0.68901452 149.1 0.51790652 0.66776056 164.1 0.5248037 0.66346255 179.1 0.52968807 0.65804602  
134.2 0.51525968 0.68854009 149.2 0.51790652 0.66776056 164.2 0.52498298 0.66330029 179.2 0.52970768 0.65878156  
134.3 0.51517521 0.68774607 149.3 0.51790652 0.66776056 164.3 0.52498298 0.66330029 179.3 0.52968807 0.65804602  
134.4 0.51516175 0.6876321 149.4 0.51790652 0.66776056 164.4 0.52501523 0.66317317 179.4 0.52974865 0.65772815  
134.5 0.51512179 0.68739442 149.5 0.51821365 0.66765923 164.5 0.52501523 0.66317317 179.5 0.52974865 0.65772815  
134.6 0.51521366 0.68703325 149.6 0.51849896 0.66777367 164.6 0.52501523 0.66317317 179.6 0.52993516 0.65780507  
134.7 0.51456638 0.6861016 149.7 0.51872984 0.6678021 164.7 0.52501523 0.66317317 179.7 0.53019912 0.6577467  
134.8 0.51480133 0.68579065 149.8 0.51898126 0.66781178 164.8 0.52501523 0.66317317 179.8 0.53019912 0.6577467  
134.9 0.51437376 0.68487222 149.9 0.51898126 0.66781178 164.9 0.52501523 0.66317317 179.9 0.53029292 0.65769841  
  
180 0.53022922 0.65769841 195 0.52935473 0.65098838 210 0.52866653 0.64777646 225 0.52909571 0.64694833  
180.1 0.53034549 0.65753566 195.1 0.52935473 0.65098838 210.1 0.52866653 0.64777646 225.1 0.52943703 0.64709341  
180.2 0.53034549 0.65753566 195.2 0.52935473 0.65098838 210.2 0.52893506 0.64778245 225.2 0.52943703 0.64709341  
180.3 0.53034549 0.65753566 195.3 0.52935473 0.65098838 210.3 0.52893506 0.64778245 225.3 0.52943703 0.64709341  
180.4 0.53034549 0.65753566 195.4 0.52935473 0.65098838 210.4 0.52893506 0.64778245 225.4 0.52907333 0.64687722  
180.5 0.5303652 0.65732922 195.5 0.52935473 0.65098838 210.5 0.52893506 0.64778245 225.5 0.52927212 0.64674508  
180.6 0.5303652 0.65732922 195.6 0.52935473 0.65098838 210.6 0.52893506 0.64778245 225.6 0.52927212 0.64674508  
180.7 0.53020386 0.65721077 195.7 0.52935473 0.65098838 210.7 0.52893506 0.64778245 225.7 0.52927212 0.64674508  
180.8 0.53020386 0.65721077 195.8 0.52929973 0.65102226 210.8 0.52893506 0.64778245 225.8 0.52927212 0.64674508  
180.9 0.53020386 0.65721077 195.9 0.52904551 0.65088278 210.9 0.52893506 0.64778245 225.9 0.52927212 0.64674508  
181 0.53020386 0.65721077 196 0.52904551 0.65088278 211 0.52893506 0.64778245 226 0.52895248 0.64662397  
181.1 0.53020386 0.65721077 196.1 0.52904551 0.65088278 211.1 0.52893506 0.64778245 226.1 0.52895248 0.64662397  
181.2 0.53020386 0.65721077 196.2 0.52930453 0.65088278 211.2 0.52893506 0.64778245 226.2 0.52895248 0.64662397  
181.3 0.53020386 0.65721077 196.3 0.52930453 0.65088278 211.3 0.52893506 0.64778245 226.3 0.52895248 0.64662397  
181.4 0.53021194 0.65698216 196.4 0.52930453 0.65088278 211.4 0.52893506 0.64778245 226.4 0.52895248 0.64662397  
181.5 0.53019217 0.65685419 196.5 0.52934441 0.65091974 211.5 0.52882756 0.64765427 226.5 0.52885848 0.64643216  
181.6 0.53019217 0.65685419 196.6 0.52934441 0.65091974 211.6 0.52882756 0.64765427 226.6 0.52881827 0.64631383  
181.7 0.53019217 0.65685419 196.7 0.52928768 0.65072561 211.7 0.52882756 0.64765427 226.7 0.52862281 0.64628998  
181.8 0.53019217 0.65685419 196.8 0.52928768 0.65072561 211.8 0.52882756 0.64765427 226.8 0.52862281 0.64628998  
181.9 0.5304068 0.65663167 196.9 0.52928768 0.65072561 211.9 0.52882756 0.64765427 226.9 0.52836856 0.64602373  
182 0.53035082 0.65643139 197 0.52922659 0.6504813 212 0.52894945 0.64770809 227 0.52836856 0.64602373  
182.1 0.53035082 0.65643139 197.1 0.52922659 0.6504813 212.1 0.52894945 0.64770809 227.1 0.52828987 0.64588746  
182.2 0.53036673 0.65628979 197.2 0.52922659 0.6504813 212.2 0.52894945 0.64770809 227.2 0.52828987 0.64588746  
182.3 0.53025723 0.65615842 197.3 0.5290978 0.65040606 212.3 0.52894945 0.64770809 227.3 0.52828987 0.64588746  
182.4 0.53022218 0.65621818 197.4 0.52930453 0.65032376 212.4 0.52894945 0.6

|       |            |            |       |            |            |       |              |            |       |            |            |
|-------|------------|------------|-------|------------|------------|-------|--------------|------------|-------|------------|------------|
| 183.6 | 0.52977738 | 0.65459266 | 198.6 | 0.52942977 | 0.649815   | 213.6 | 0.52930139   | 0.64788399 | 228.6 | 0.52857291 | 0.64601621 |
| 183.7 | 0.52977738 | 0.65459266 | 198.7 | 0.52962604 | 0.64973898 | 213.7 | 0.52930139   | 0.64788399 | 228.7 | 0.52857291 | 0.64601621 |
| 183.8 | 0.52977738 | 0.65459266 | 198.8 | 0.52962604 | 0.64973898 | 213.8 | 0.52930139   | 0.64788399 | 228.8 | 0.52857291 | 0.64601621 |
| 183.9 | 0.52950449 | 0.6539662  | 198.9 | 0.52962604 | 0.64973898 | 213.9 | 0.5290661    | 0.64780542 | 228.9 | 0.52857291 | 0.64601621 |
| 184   | 0.52939516 | 0.65375259 | 199   | 0.52962604 | 0.64973898 | 214   | 0.5290661    | 0.64780542 | 229   | 0.52857291 | 0.64601621 |
| 184.1 | 0.52940314 | 0.65375314 | 199.1 | 0.52949866 | 0.64951047 | 214.1 | 0.5289922    | 0.64774316 | 229.1 | 0.52857291 | 0.64601621 |
| 184.2 | 0.52947129 | 0.65363817 | 199.2 | 0.52949866 | 0.64951047 | 214.2 | 0.5289922    | 0.64774316 | 229.2 | 0.5287645  | 0.6460651  |
| 184.3 | 0.52948399 | 0.65327697 | 199.3 | 0.52949866 | 0.64951047 | 214.3 | 0.5289922    | 0.64774316 | 229.3 | 0.5287645  | 0.6460651  |
| 184.4 | 0.52953432 | 0.65317413 | 199.4 | 0.52947171 | 0.64940766 | 214.4 | 0.5289922    | 0.64774316 | 229.4 | 0.5287645  | 0.6460651  |
| 184.5 | 0.52953432 | 0.65311703 | 199.5 | 0.52939347 | 0.64916919 | 214.5 | 0.5289922    | 0.64774316 | 229.5 | 0.5287645  | 0.6460651  |
| 184.6 | 0.52953432 | 0.65311703 | 199.6 | 0.52939347 | 0.64916919 | 214.6 | 0.5289922    | 0.64774316 | 229.6 | 0.5287645  | 0.6460651  |
| 184.7 | 0.52953432 | 0.65311703 | 199.7 | 0.5294129  | 0.64901026 | 214.7 | 0.5289922    | 0.64774316 | 229.7 | 0.5287645  | 0.6460651  |
| 184.8 | 0.52953432 | 0.65311703 | 199.8 | 0.5294129  | 0.64901026 | 214.8 | 0.5289922    | 0.64774316 | 229.8 | 0.5287645  | 0.6460651  |
| 184.9 | 0.52949105 | 0.65312052 | 199.9 | 0.52936354 | 0.64871501 | 214.9 | 0.5289937    | 0.6476208  | 229.9 | 0.5287645  | 0.6460651  |
| 185   | 0.52949105 | 0.65312052 | 200   | 0.52931353 | 0.64861373 | 215   | 0.5289937    | 0.6476208  | 230   | 0.5287645  | 0.64601835 |
| 185.1 | 0.52949105 | 0.65312052 | 200.1 | 0.52899402 | 0.64832919 | 215.1 | 0.5289937    | 0.6476208  | 230.1 | 0.5287645  | 0.64601835 |
| 185.2 | 0.52928838 | 0.65302333 | 200.2 | 0.528916   | 0.64804802 | 215.2 | 0.5289937    | 0.6476208  | 230.2 | 0.5287645  | 0.64601835 |
| 185.3 | 0.52928838 | 0.65302333 | 200.3 | 0.52896483 | 0.64803637 | 215.3 | 0.5289937    | 0.6476208  | 230.3 | 0.5287645  | 0.64601835 |
| 185.4 | 0.52928838 | 0.65302333 | 200.4 | 0.52896483 | 0.64803637 | 215.4 | 0.5289937    | 0.6476208  | 230.4 | 0.5287645  | 0.64601835 |
| 185.5 | 0.52928838 | 0.65302333 | 200.5 | 0.52896483 | 0.64803637 | 215.5 | 0.5289937    | 0.6476208  | 230.5 | 0.5287645  | 0.64601835 |
| 185.6 | 0.52934749 | 0.65285977 | 200.6 | 0.52896483 | 0.64803637 | 215.6 | 0.5289937    | 0.6476208  | 230.6 | 0.5287645  | 0.64601835 |
| 185.7 | 0.52934749 | 0.65285977 | 200.7 | 0.52896483 | 0.64803637 | 215.7 | 0.5289937    | 0.6476208  | 230.7 | 0.5287645  | 0.64601835 |
| 185.8 | 0.52934749 | 0.65285977 | 200.8 | 0.52896483 | 0.64803637 | 215.8 | 0.5289937    | 0.6476208  | 230.8 | 0.5287645  | 0.64601835 |
| 185.9 | 0.52934749 | 0.65285977 | 200.9 | 0.52896483 | 0.64803637 | 215.9 | 0.5289937    | 0.6476208  | 230.9 | 0.5287645  | 0.64601835 |
| 186   | 0.52939326 | 0.65285835 | 201   | 0.52868263 | 0.6479344  | 216   | 0.52891656   | 0.64759142 | 231   | 0.5287645  | 0.64601835 |
| 186.1 | 0.52939326 | 0.65285835 | 201.1 | 0.52868263 | 0.6479344  | 216.1 | 0.52891656   | 0.64759142 | 231.1 | 0.5287645  | 0.64601835 |
| 186.2 | 0.52939326 | 0.65285835 | 201.2 | 0.52868263 | 0.6479344  | 216.2 | 0.52891656   | 0.64759142 | 231.2 | 0.52891278 | 0.64602366 |
| 186.3 | 0.52939326 | 0.65285835 | 201.3 | 0.52868263 | 0.6479344  | 216.3 | 0.52891656   | 0.64759142 | 231.3 | 0.52891278 | 0.64602366 |
| 186.4 | 0.52939326 | 0.65285835 | 201.4 | 0.52868263 | 0.6479344  | 216.4 | 0.52891656   | 0.64759142 | 231.4 | 0.52899574 | 0.64590632 |
| 186.5 | 0.52939326 | 0.65285835 | 201.5 | 0.52868263 | 0.6479344  | 216.5 | 0.52891656   | 0.64759142 | 231.5 | 0.52899574 | 0.64590632 |
| 186.6 | 0.52939326 | 0.65285835 | 201.6 | 0.52868263 | 0.6479344  | 216.6 | 0.52891656   | 0.64759142 | 231.6 | 0.52899574 | 0.64590632 |
| 186.7 | 0.52939326 | 0.65285835 | 201.7 | 0.52868263 | 0.6479344  | 216.7 | 0.52891656   | 0.64759142 | 231.7 | 0.52882873 | 0.64583142 |
| 186.8 | 0.52939326 | 0.65285835 | 201.8 | 0.52868263 | 0.6479344  | 216.8 | 0.52891656   | 0.64759142 | 231.8 | 0.52882873 | 0.64583142 |
| 186.9 | 0.52939326 | 0.65285835 | 201.9 | 0.52868263 | 0.6479344  | 216.9 | 0.52891656   | 0.64759142 | 231.9 | 0.52882873 | 0.64583142 |
| 187   | 0.5295458  | 0.65295621 | 202   | 0.52868263 | 0.6479344  | 217   | 0.52912737   | 0.64764296 | 232   | 0.52882873 | 0.64583142 |
| 187.1 | 0.52947423 | 0.65293269 | 202.1 | 0.52868263 | 0.6479344  | 217.1 | 0.52927643   | 0.64757099 | 232.1 | 0.52882873 | 0.64583142 |
| 187.2 | 0.52947423 | 0.65293269 | 202.2 | 0.52868263 | 0.6479344  | 217.2 | 0.52927643   | 0.64757099 | 232.2 | 0.52882873 | 0.64583142 |
| 187.3 | 0.52947423 | 0.65293269 | 202.3 | 0.52868263 | 0.6479344  | 217.3 | 0.52927643   | 0.64757099 | 232.3 | 0.52905981 | 0.64596483 |
| 187.4 | 0.52947423 | 0.65293269 | 202.4 | 0.52868263 | 0.6479344  | 217.4 | 0.52927643   | 0.64757099 | 232.4 | 0.52905981 | 0.64596483 |
| 187.5 | 0.52947423 | 0.65293269 | 202.5 | 0.52868263 | 0.6479344  | 217.5 | 0.52927643   | 0.64757099 | 232.5 | 0.52905981 | 0.64596483 |
| 187.6 | 0.52947423 | 0.65293269 | 202.6 | 0.52868263 | 0.6479344  | 217.6 | 0.52927643   | 0.64757099 | 232.6 | 0.52905981 | 0.64596483 |
| 187.7 | 0.5292439  | 0.65279173 | 202.7 | 0.52868263 | 0.6479344  | 217.7 | 0.52927643   | 0.64757099 | 232.7 | 0.52905981 | 0.64596483 |
| 187.8 | 0.5292439  | 0.65279173 | 202.8 | 0.52868263 | 0.6479344  | 217.8 | 0.52927643   | 0.64757099 | 232.8 | 0.52905981 | 0.64596483 |
| 187.9 | 0.52949359 | 0.65286678 | 202.9 | 0.52868263 | 0.6479344  | 217.9 | 0.52927643   | 0.64757099 | 232.9 | 0.52905981 | 0.64596483 |
| 188   | 0.52949359 | 0.65286678 | 203   | 0.52868263 | 0.6479344  | 218   | 0.52927643   | 0.64757099 | 233   | 0.52905981 | 0.64596483 |
| 188.1 | 0.52949359 | 0.65286678 | 203.1 | 0.52868263 | 0.6479344  | 218.1 | 0.52927643   | 0.64757099 | 233.1 | 0.52925242 | 0.64595758 |
| 188.2 | 0.52949359 | 0.65286678 | 203.2 | 0.52868263 | 0.6479344  | 218.2 | 0.52925242   | 0.64755232 | 233.2 | 0.52925242 | 0.64595758 |
| 188.3 | 0.52949359 | 0.65286678 | 203.3 | 0.52868263 | 0.6479344  | 218.3 | 0.52925242   | 0.64755232 | 233.3 | 0.52925242 | 0.64595758 |
| 188.4 | 0.52949359 | 0.65286678 | 203.4 | 0.52868263 | 0.6479344  | 218.4 | 0.52925242   | 0.64755232 | 233.4 | 0.52925242 | 0.64595758 |
| 188.5 | 0.52949359 | 0.65286678 | 203.5 | 0.52868263 | 0.6479344  | 218.5 | 0.52925242   | 0.64755232 | 233.5 | 0.52925242 | 0.64595758 |
| 188.6 | 0.52958617 | 0.65263563 | 203.6 | 0.52868263 | 0.6479344  | 218.6 | 0.52918877   | 0.64752313 | 233.6 | 0.52925242 | 0.64595758 |
| 188.7 | 0.52958617 | 0.65263563 | 203.7 | 0.52868263 | 0.6479344  | 218.7 | 0.52918877   | 0.64752313 | 233.7 | 0.52925242 | 0.64595758 |
| 188.8 | 0.52958617 | 0.65263563 | 203.8 | 0.52868263 | 0.6479344  | 218.8 | 0.52918877   | 0.64752313 | 233.8 | 0.52925242 | 0.64595758 |
| 188.9 | 0.52958617 | 0.65263563 | 203.9 | 0.52868263 | 0.6479344  | 218.9 | 0.52918877   | 0.64752313 | 233.9 | 0.52925242 | 0.64595758 |
| 189   | 0.52958617 | 0.65263563 | 204   | 0.52868263 | 0.6479344  | 219   | 0.52918877   | 0.64752313 | 234   | 0.52925242 | 0.64595758 |
| 189.1 | 0.52958617 | 0.65263563 | 204.1 | 0.52868263 | 0.6479344  | 219.1 | 0.52918877   | 0.64752313 | 234.1 | 0.52925242 | 0.64595758 |
| 189.2 | 0.52958617 | 0.65263563 | 204.2 | 0.52868263 | 0.6479344  | 219.2 | 0.52918877   | 0.64752313 | 234.2 | 0.5295919  | 0.64563798 |
| 189.3 | 0.52969552 | 0.65238172 | 204.3 | 0.52868263 | 0.6479344  | 219.3 | 0.52918877   | 0.64752313 | 234.3 | 0.5295919  | 0.64563798 |
| 189.4 | 0.52969552 | 0.65238172 | 204.4 | 0.52868263 | 0.6479344  | 219.4 | 0.52928589   | 0.64749873 | 234.4 | 0.5295919  | 0.64563798 |
| 189.5 | 0.52969552 | 0.65238172 | 204.5 | 0.52868263 | 0.6479344  | 219.5 | 0.52928589   | 0.64749873 | 234.5 | 0.5295919  | 0.64563798 |
| 189.6 | 0.52931951 | 0.65228298 | 204.6 | 0.52868263 | 0.6479344  | 219.6 | 0.52928589   | 0.64749873 | 234.6 | 0.5295919  | 0.64563798 |
| 189.7 | 0.52937898 | 0.65217765 | 204.7 | 0.52868263 | 0.6479344  | 219.7 | 0.52928589   | 0.64749873 | 234.7 | 0.5295919  | 0.64563798 |
| 189.8 | 0.52937898 | 0.65217765 | 204.8 | 0.52868263 | 0.6479344  | 219.8 | 0.52928589   | 0.64749873 | 234.8 | 0.5295919  | 0.64563798 |
| 189.9 | 0.52937898 | 0.65217765 | 204.9 | 0.52868263 | 0.6479344  | 219.9 | 0.52928589   | 0.64749873 | 234.9 | 0.5295919  | 0.64563798 |
| 190   | 0.52937898 | 0.65217765 | 205   | 0.52868263 | 0.6479344  | 220   | 0.52942881   | 0.6474448  | 235   | 0.5295919  | 0.64563798 |
| 190.1 | 0.52937898 | 0.65217765 | 205.1 | 0.52868263 | 0.6479344  | 220.1 | 0.52942881   | 0.6474448  | 235.1 | 0.5295919  | 0.64563798 |
| 190.2 | 0.52937898 | 0.65217765 | 205.2 | 0.52868263 | 0.6479344  | 220.2 | 0.52942881   | 0.6474448  | 235.2 | 0.5295919  | 0.64563798 |
| 190.3 | 0.5293592  | 0.65223201 | 205.3 | 0.52868263 | 0.6479344  | 220.3 | 0.52942881   | 0.6474448  | 235.3 | 0.5295919  | 0.64563798 |
| 190.4 | 0.5293592  | 0.65223201 | 205.4 | 0.52868263 | 0.6479344  | 220.4 | 0.52942881   | 0.6474448  | 235.4 | 0.5295919  | 0.64563798 |
| 190.5 | 0.5293592  | 0.65223201 | 205.5 | 0.52868263 | 0.6479344  | 220.5 | 0.52942881   | 0.6474448  | 235.5 | 0.5295919  | 0.64563798 |
| 190.6 | 0.5293592  | 0.65223201 | 205.6 | 0.52857298 | 0.64795581 | 220.6 | 0.52942881   | 0.6474448  | 235.6 | 0.5295919  | 0.64563798 |
| 190.7 | 0.5293592  | 0.65223201 | 205.7 | 0.52857298 | 0.64795581 | 220.7 | 0.52942881   | 0.6474448  | 235.7 | 0.5295919  | 0.64563798 |
| 190.8 | 0.5293592  | 0.65223201 | 205.8 | 0.52857298 | 0.64795581 | 220.8 | 0.52942881   | 0.6474448  | 235.8 | 0.5295919  | 0.64563798 |
| 190.9 | 0.52897308 | 0.6521155  | 205.9 | 0.52857298 | 0.64795581 | 220.9 | 0.52942881   | 0.6474448  | 235.9 | 0.52942881 | 0.6474448  |
| 191   | 0.52897308 | 0.6521155  | 206   | 0.52847374 | 0.64773899 | 221   | 0.52956058   | 0.64745025 | 236   | 0.5300827  | 0.64577226 |
| 191.1 | 0.52897308 | 0.6521155  | 206.1 | 0.52847374 | 0.64773899 | 221.1 | 0.52941785   | 0.64736776 | 236.1 | 0.5300827  | 0.64577226 |
| 191.2 | 0.52916356 | 0.65215657 | 206.2 | 0.52847374 | 0.64773899 | 221.2 | 0.52941785</ |            |       |            |            |

Corresponding p-values for PRCC sensitivity indices

| Time discretization | L          | E         | [LACT]_0 | Time discretization | L          | E        | [LACT]_0 | Time discretization | L        | E        | [LACT]_0 | Time discretization | L        | E        | [LACT]_0 |
|---------------------|------------|-----------|----------|---------------------|------------|----------|----------|---------------------|----------|----------|----------|---------------------|----------|----------|----------|
| 0                   | 0          | 0         | 0        | 15                  | 0.00023815 | 2.13E-91 |          | 30                  | 9.86E-06 | 1.20E-73 |          | 45                  | 6.18E-08 | 2.11E-57 |          |
| 0.1                 | 1.66E-06   | 2.87E-171 |          | 15.1                | 0.00022881 | 2.56E-91 |          | 30.1                | 9.78E-06 | 1.31E-73 |          | 45.1                | 5.69E-08 | 2.19E-57 |          |
| 0.2                 | 1.35E-05   | 7.38E-136 |          | 15.2                | 0.00023494 | 2.73E-91 |          | 30.2                | 9.84E-06 | 1.49E-73 |          | 45.2                | 5.47E-08 | 2.31E-57 |          |
| 0.3                 | 3.68E-05   | 4.90E-124 |          | 15.3                | 0.00021831 | 2.94E-91 |          | 30.3                | 1.03E-05 | 1.93E-73 |          | 45.3                | 5.68E-08 | 2.76E-57 |          |
| 0.4                 | 5.86E-05   | 2.12E-118 |          | 15.4                | 0.00021993 | 4.22E-91 |          | 30.4                | 1.05E-05 | 2.49E-73 |          | 45.4                | 5.65E-08 | 2.92E-57 |          |
| 0.5                 | 6.26E-05   | 1.18E-116 |          | 15.5                | 0.00019388 | 4.79E-91 |          | 30.5                | 9.37E-06 | 3.01E-73 |          | 45.5                | 5.49E-08 | 3.10E-57 |          |
| 0.6                 | 8.19E-05   | 1.53E-114 |          | 15.6                | 0.00019583 | 5.04E-91 |          | 30.6                | 8.43E-06 | 3.18E-73 |          | 45.6                | 5.27E-08 | 3.68E-57 |          |
| 0.7                 | 9.70E-05   | 1.57E-113 |          | 15.7                | 0.00018819 | 5.01E-91 |          | 30.7                | 7.48E-06 | 4.28E-73 |          | 45.7                | 5.24E-08 | 4.60E-57 |          |
| 0.8                 | 0.00012762 | 8.16E-113 |          | 15.8                | 0.00016463 | 6.41E-91 |          | 30.8                | 6.51E-06 | 7.99E-73 |          | 45.8                | 5.22E-08 | 4.99E-57 |          |
| 0.9                 | 0.00014574 | 5.54E-112 |          | 15.9                | 0.00017826 | 8.76E-91 |          | 30.9                | 6.16E-06 | 1.54E-72 |          | 45.9                | 4.81E-08 | 4.71E-57 |          |
| 1                   | 0.00015845 | 2.48E-111 |          | 16                  | 0.00016987 | 9.98E-91 |          | 31                  | 5.71E-06 | 2.26E-72 |          | 46                  | 4.81E-08 | 5.04E-57 |          |
| 1.1                 | 0.00015946 | 5.08E-111 |          | 16.1                | 0.00015754 | 9.44E-91 |          | 31.1                | 5.59E-06 | 3.15E-72 |          | 46.1                | 4.65E-08 | 5.37E-57 |          |
| 1.2                 | 0.00020717 | 1.21E-110 |          | 16.2                | 0.00014322 | 1.38E-90 |          | 31.2                | 5.65E-06 | 4.12E-72 |          | 46.2                | 4.50E-08 | 5.62E-57 |          |
| 1.3                 | 0.00023155 | 3.51E-110 |          | 16.3                | 0.00013745 | 2.04E-90 |          | 31.3                | 4.93E-06 | 5.30E-72 |          | 46.3                | 4.44E-08 | 5.73E-57 |          |
| 1.4                 | 0.00027092 | 1.19E-109 |          | 16.4                | 0.00014327 | 3.28E-90 |          | 31.4                | 4.52E-06 | 7.45E-72 |          | 46.4                | 4.19E-08 | 7.28E-57 |          |
| 1.5                 | 0.00025906 | 1.77E-109 |          | 16.5                | 0.00014581 | 3.73E-90 |          | 31.5                | 4.84E-06 | 1.20E-71 |          | 46.5                | 4.03E-08 | 6.94E-57 |          |
| 1.6                 | 0.00026798 | 3.51E-109 |          | 16.6                | 0.00014251 | 5.55E-90 |          | 31.6                | 5.07E-06 | 1.56E-71 |          | 46.6                | 3.99E-08 | 7.44E-57 |          |
| 1.7                 | 0.00026807 | 7.73E-109 |          | 16.7                | 0.00014149 | 6.54E-90 |          | 31.7                | 5.06E-06 | 1.64E-71 |          | 46.7                | 3.87E-08 | 7.46E-57 |          |
| 1.8                 | 0.00027606 | 1.59E-108 |          | 16.8                | 0.00014669 | 7.07E-90 |          | 31.8                | 5.10E-06 | 1.83E-71 |          | 46.8                | 3.70E-08 | 8.27E-57 |          |
| 1.9                 | 0.00030476 | 2.54E-108 |          | 16.9                | 0.00013533 | 7.87E-90 |          | 31.9                | 4.94E-06 | 2.22E-71 |          | 46.9                | 3.86E-08 | 1.06E-56 |          |
| 2                   | 0.00038383 | 4.55E-108 |          | 17                  | 0.00014484 | 1.26E-89 |          | 32                  | 5.00E-06 | 4.28E-71 |          | 47                  | 3.70E-08 | 1.14E-56 |          |
| 2.1                 | 0.00042431 | 5.13E-108 |          | 17.1                | 0.0001435  | 2.36E-89 |          | 32.1                | 5.28E-06 | 4.57E-71 |          | 47.1                | 3.74E-08 | 1.38E-56 |          |
| 2.2                 | 0.00048509 | 1.39E-107 |          | 17.2                | 0.00014388 | 3.04E-89 |          | 32.2                | 5.29E-06 | 6.13E-71 |          | 47.2                | 3.75E-08 | 1.41E-56 |          |
| 2.3                 | 0.00045804 | 1.85E-107 |          | 17.3                | 0.00014155 | 3.80E-89 |          | 32.3                | 4.49E-06 | 8.97E-71 |          | 47.3                | 3.52E-08 | 1.52E-56 |          |
| 2.4                 | 0.00045019 | 2.03E-107 |          | 17.4                | 0.00015712 | 8.78E-89 |          | 32.4                | 5.90E-06 | 1.54E-70 |          | 47.4                | 3.05E-08 | 1.72E-56 |          |
| 2.5                 | 0.00042419 | 2.56E-107 |          | 17.5                | 0.00014883 | 1.06E-88 |          | 32.5                | 5.85E-06 | 1.78E-70 |          | 47.5                | 2.82E-08 | 1.86E-56 |          |
| 2.6                 | 0.00042542 | 2.91E-107 |          | 17.6                | 0.00016227 | 1.63E-88 |          | 32.6                | 6.12E-06 | 3.41E-70 |          | 47.6                | 2.86E-08 | 2.21E-56 |          |
| 2.7                 | 0.00036322 | 3.57E-107 |          | 17.7                | 0.00017527 | 2.83E-88 |          | 32.7                | 6.20E-06 | 4.86E-70 |          | 47.7                | 2.59E-08 | 2.20E-56 |          |
| 2.8                 | 0.00040265 | 4.69E-107 |          | 17.8                | 0.00015826 | 4.56E-88 |          | 32.8                | 6.00E-06 | 6.02E-70 |          | 47.8                | 2.40E-08 | 2.43E-56 |          |
| 2.9                 | 0.00039268 | 7.15E-107 |          | 17.9                | 0.00015593 | 7.17E-88 |          | 32.9                | 6.23E-06 | 1.32E-69 |          | 47.9                | 2.14E-08 | 2.49E-56 |          |
| 3                   | 0.00039016 | 6.46E-107 |          | 18                  | 0.00015772 | 9.18E-88 |          | 33                  | 5.75E-06 | 2.07E-69 |          | 48                  | 2.08E-08 | 2.66E-56 |          |
| 3.1                 | 0.00036219 | 6.84E-107 |          | 18.1                | 0.00015438 | 1.39E-87 |          | 33.1                | 5.39E-06 | 3.16E-69 |          | 48.1                | 2.05E-08 | 2.76E-56 |          |
| 3.2                 | 0.00038955 | 7.79E-107 |          | 18.2                | 0.00017317 | 3.47E-87 |          | 33.2                | 5.51E-06 | 5.95E-69 |          | 48.2                | 2.13E-08 | 3.16E-56 |          |
| 3.3                 | 0.00039499 | 8.32E-107 |          | 18.3                | 0.00017274 | 6.20E-87 |          | 33.3                | 5.53E-06 | 7.32E-69 |          | 48.3                | 2.02E-08 | 3.79E-56 |          |
| 3.4                 | 0.00038143 | 9.67E-107 |          | 18.4                | 0.00019255 | 1.25E-86 |          | 33.4                | 5.41E-06 | 1.24E-68 |          | 48.4                | 1.95E-08 | 4.44E-56 |          |
| 3.5                 | 0.00038386 | 1.17E-106 |          | 18.5                | 0.00020139 | 1.52E-86 |          | 33.5                | 5.54E-06 | 1.95E-68 |          | 48.5                | 2.08E-08 | 4.64E-56 |          |
| 3.6                 | 0.00032262 | 1.62E-106 |          | 18.6                | 0.00018384 | 1.73E-86 |          | 33.6                | 5.40E-06 | 2.79E-68 |          | 48.6                | 2.00E-08 | 5.56E-56 |          |
| 3.7                 | 0.00032262 | 1.62E-106 |          | 18.7                | 0.00017457 | 2.07E-86 |          | 33.7                | 5.10E-06 | 4.05E-68 |          | 48.7                | 2.14E-08 | 6.50E-56 |          |
| 3.8                 | 0.00031139 | 1.67E-106 |          | 18.8                | 0.00017426 | 2.39E-86 |          | 33.8                | 5.21E-06 | 5.05E-68 |          | 48.8                | 1.98E-08 | 6.78E-56 |          |
| 3.9                 | 0.00029115 | 1.90E-106 |          | 18.9                | 0.00017779 | 3.85E-86 |          | 33.9                | 4.49E-06 | 9.31E-68 |          | 48.9                | 1.86E-08 | 7.30E-56 |          |
| 4                   | 0.00030422 | 2.37E-106 |          | 19                  | 0.00018629 | 7.59E-86 |          | 34                  | 4.17E-06 | 9.36E-68 |          | 49                  | 1.77E-08 | 7.41E-56 |          |
| 4.1                 | 0.00027081 | 3.17E-106 |          | 19.1                | 0.00020047 | 1.05E-85 |          | 34.1                | 3.84E-06 | 1.39E-67 |          | 49.1                | 1.71E-08 | 7.62E-56 |          |
| 4.2                 | 0.00025413 | 4.46E-106 |          | 19.2                | 0.00019233 | 1.18E-85 |          | 34.2                | 3.74E-06 | 2.03E-67 |          | 49.2                | 1.67E-08 | 9.23E-56 |          |
| 4.3                 | 0.0002576  | 4.87E-106 |          | 19.3                | 0.00020824 | 1.55E-85 |          | 34.3                | 3.78E-06 | 3.14E-67 |          | 49.3                | 1.57E-08 | 1.00E-55 |          |
| 4.4                 | 0.00025521 | 5.56E-106 |          | 19.4                | 0.00021381 | 2.10E-85 |          | 34.4                | 3.45E-06 | 4.74E-67 |          | 49.4                | 1.50E-08 | 9.78E-56 |          |
| 4.5                 | 0.00025018 | 6.95E-106 |          | 19.5                | 0.00021388 | 3.41E-85 |          | 34.5                | 3.89E-06 | 7.24E-67 |          | 49.5                | 1.45E-08 | 9.51E-56 |          |
| 4.6                 | 0.00024275 | 1.23E-105 |          | 19.6                | 0.00023207 | 5.82E-85 |          | 34.6                | 3.49E-06 | 8.45E-67 |          | 49.6                | 1.43E-08 | 1.45E-55 |          |
| 4.7                 | 0.00025037 | 1.28E-105 |          | 19.7                | 0.00022252 | 6.95E-85 |          | 34.7                | 3.68E-06 | 1.03E-66 |          | 49.7                | 1.32E-08 | 1.71E-55 |          |
| 4.8                 | 0.00024893 | 1.90E-105 |          | 19.8                | 0.00022178 | 1.33E-84 |          | 34.8                | 3.36E-06 | 1.20E-66 |          | 49.8                | 1.20E-08 | 1.83E-55 |          |
| 4.9                 | 0.00025862 | 2.19E-105 |          | 19.9                | 0.00019045 | 1.04E-84 |          | 34.9                | 3.10E-06 | 1.33E-66 |          | 49.9                | 1.22E-08 | 2.23E-55 |          |
| 5                   | 0.00025931 | 3.46E-105 |          | 20                  | 0.00018669 | 1.01E-84 |          | 35                  | 2.94E-06 | 1.63E-66 |          | 50                  | 1.08E-08 | 2.31E-55 |          |
| 5.1                 | 0.00027362 | 3.96E-105 |          | 20.1                | 0.00019383 | 1.17E-84 |          | 35.1                | 2.40E-06 | 2.33E-66 |          | 50.1                | 1.02E-08 | 2.76E-55 |          |
| 5.2                 | 0.00023279 | 4.14E-105 |          | 20.2                | 0.00017903 | 1.36E-84 |          | 35.2                | 2.18E-06 | 3.91E-66 |          | 50.2                | 1.00E-08 | 3.23E-55 |          |
| 5.3                 | 0.00025433 | 7.90E-105 |          | 20.3                | 0.00017216 | 1.71E-84 |          | 35.3                | 2.21E-06 | 5.17E-66 |          | 50.3                | 9.99E-09 | 3.22E-55 |          |
| 5.4                 | 0.00025183 | 8.67E-105 |          | 20.4                | 0.00016938 | 2.57E-84 |          | 35.4                | 2.18E-06 | 9.05E-66 |          | 50.4                | 9.60E-09 | 3.79E-55 |          |
| 5.5                 | 0.00026204 | 1.25E-104 |          | 20.5                | 0.00016671 | 3.34E-84 |          | 35.5                | 2.16E-06 | 1.27E-65 |          | 50.5                | 9.64E-09 | 3.96E-55 |          |
| 5.6                 | 0.00026558 | 1.42E-104 |          | 20.6                | 0.00016183 | 3.31E-84 |          | 35.6                | 2.12E-06 | 2.08E-65 |          | 50.6                | 8.88E-09 | 4.02E-55 |          |
| 5.7                 | 0.00025685 | 1.58E-104 |          | 20.7                | 0.00016982 | 4.15E-84 |          | 35.7                | 2.14E-06 | 2.66E-65 |          | 50.7                | 8.81E-09 | 4.78E-55 |          |
| 5.8                 | 0.0002548  | 1.77E-104 |          | 20.8                | 0.00017677 | 6.04E-84 |          | 35.8                | 2.16E-06 | 5.99E-65 |          | 50.8                | 8.45E-09 | 4.55E-55 |          |
| 5.9                 | 0.00021595 | 2.55E-104 |          | 20.9                | 0.00017056 | 6.97E-84 |          | 35.9                | 1.90E-06 | 7.71E-65 |          | 50.9                | 8.16E-09 | 5.98E-55 |          |
| 6                   | 0.00020029 | 2.73E-104 |          | 21                  | 0.00016045 | 1.18E-83 |          | 36                  | 1.96E-06 | 1.36E-64 |          | 51                  | 7.76E-09 | 6.57E-55 |          |
| 6.1                 | 0.00018167 | 3.12E-104 |          | 21.1                | 0.0001476  | 2.20E-83 |          | 36.1                | 1.98E-06 | 1.67E-64 |          | 51.1                | 7.45E-09 | 7.92E-55 |          |
| 6.2                 | 0.0001843  | 3.77E-104 |          | 21.2                | 0.00014057 | 2.95E-83 |          | 36.2                | 2.00E-06 | 2.10E-64 |          | 51.2                | 7.46E-09 | 8.66E-55 |          |
| 6.3                 | 0.00019648 | 4.48E-104 |          | 21.3                | 0.00013281 | 3.94E-83 |          | 36.3                | 1.96E-06 | 2.94E-64 |          | 51.3                | 7.79E-09 | 1.04E-54 |          |
| 6.4                 | 0.00019913 | 4.95E-104 |          | 21.4                | 0.00013258 | 4.61E-83 |          | 36.4                | 1.90E-06 | 3.37E-64 |          | 51.4                | 7.84E-09 | 1.19E-54 |          |
| 6.5                 | 0.00019161 | 6.75E-104 |          | 21.5                | 0.00011533 | 6.29E-83 |          | 36.5                | 1.97E-06 | 5.07E-64 |          | 51.5                | 7.89E-09 | 1.33E-54 |          |
| 6.6                 | 0.00017399 | 1.08E-103 |          | 21.6                | 0.00011204 | 6.64E-83 |          | 36.6                | 2.06E-06 | 9.82E-64 |          | 51.6                | 7.99E-09 | 1.39E-54 |          |
| 6.7                 | 0.00016602 | 1.75E-103 |          | 21.7                | 0.00011534 | 9.49E-83 |          | 36.7                | 1.78E-06 | 1.59E-63 |          | 51.7                | 8.15E-09 | 1.64E-54 |          |
| 6.8                 | 0.00016714 | 3.99E-103 |          | 21.8                | 0.00011344 | 1.12E-82 |          | 36.8                | 1.84E-06 | 2.09E-63 |          | 51.8                | 8.31E-09 | 1.82E-54 |          |
| 6.9                 | 0.00015869 | 8.53E-103 |          | 21.9                | 0.00010628 | 2.00E-82 |          | 36.9                | 1.78E-06 | 3.29E-63 |          | 51.9                | 7.96E-09 | 2.21E-54 |          |
| 7                   | 0.00015995 | 1.07E-102 |          | 22                  | 0.00010328 | 3.69E-82 |          | 37                  | 1.81E-06 | 3.65E-63 |          | 52                  | 7.54E-09 | 2.29E-54 |          |
| 7.1                 | 0.00017368 | 1.41E-102 |          | 22.1                | 0.00010133 | 3.76E-82 |          | 37.1                | 1.71E-06 | 6.21E-63 |          | 52.1                | 6.94E-09 | 2.34E-54 |          |
| 7.2                 | 0.00018339 | 2.34E-102 |          | 22.2                | 9.66E-05   | 4.08E-82 |          | 37.2                | 1.63E-06 | 7.43E-63 |          | 52.2                | 7.15E-09 | 2.51E-54 |          |
| 7.3                 | 0.00017228 | 4.31E-102 |          | 22.3                | 8.32E-05   | 4.30E-82 |          | 37.3                | 1.79E-06 | 1.00E-62 |          | 52.3                | 7.01E-09 | 2.82E-54 |          |
| 7.4                 | 0.0001862  | 7.75E-102 |          | 22.4                | 9.16E-05   | 5.97E-82 |          | 37.4                | 1.73E-06 | 1.42E-62 |          | 52.4                | 7.03E-09 | 3.15E-54 |          |
| 7.5                 | 0.00017305 | 7.59E-102 |          | 22.5                | 9.67E-05   | 9.54E-82 |          | 37.5                | 1.65E-06 | 2.27E-62 |          | 52.5                | 6.98E-09 | 3.63E-54 |          |
| 7.6                 | 0.00017066 |           |          |                     |            |          |          |                     |          |          |          |                     |          |          |          |

|      |            |          |      |          |          |      |          |          |       |          |          |
|------|------------|----------|------|----------|----------|------|----------|----------|-------|----------|----------|
| 11.9 | 0.00011003 | 8.60E-96 | 26.9 | 3.69E-05 | 1.94E-77 | 41.9 | 2.23E-07 | 1.51E-59 | 56.9  | 3.70E-09 | 1.45E-51 |
| 12   | 0.00012068 | 1.32E-95 | 27   | 3.87E-05 | 2.43E-77 | 42   | 2.05E-07 | 1.67E-59 | 57    | 3.62E-09 | 1.50E-51 |
| 12.1 | 0.00012883 | 1.76E-95 | 27.1 | 3.50E-05 | 2.63E-77 | 42.1 | 1.77E-07 | 2.03E-59 | 57.1  | 3.79E-09 | 1.61E-51 |
| 12.2 | 0.0001574  | 4.19E-95 | 27.2 | 3.48E-05 | 2.81E-77 | 42.2 | 1.75E-07 | 2.75E-59 | 57.2  | 3.57E-09 | 1.80E-51 |
| 12.3 | 0.00016107 | 6.11E-95 | 27.3 | 3.18E-05 | 3.43E-77 | 42.3 | 1.64E-07 | 3.31E-59 | 57.3  | 3.46E-09 | 2.03E-51 |
| 12.4 | 0.00016008 | 1.09E-94 | 27.4 | 3.35E-05 | 4.31E-77 | 42.4 | 1.59E-07 | 4.15E-59 | 57.4  | 3.30E-09 | 2.09E-51 |
| 12.5 | 0.00016398 | 1.56E-94 | 27.5 | 3.18E-05 | 6.04E-77 | 42.5 | 1.57E-07 | 4.77E-59 | 57.5  | 3.21E-09 | 2.44E-51 |
| 12.6 | 0.0001634  | 1.61E-94 | 27.6 | 3.32E-05 | 1.30E-76 | 42.6 | 1.38E-07 | 5.79E-59 | 57.6  | 3.23E-09 | 2.74E-51 |
| 12.7 | 0.00016141 | 3.51E-94 | 27.7 | 3.25E-05 | 2.07E-76 | 42.7 | 1.31E-07 | 6.79E-59 | 57.7  | 3.02E-09 | 3.34E-51 |
| 12.8 | 0.00017711 | 5.27E-94 | 27.8 | 3.27E-05 | 2.90E-76 | 42.8 | 1.28E-07 | 9.56E-59 | 57.8  | 3.09E-09 | 3.70E-51 |
| 12.9 | 0.00019029 | 7.52E-94 | 27.9 | 2.98E-05 | 4.69E-76 | 42.9 | 1.18E-07 | 1.03E-58 | 57.9  | 2.95E-09 | 4.11E-51 |
| 13   | 0.00019419 | 8.70E-94 | 28   | 3.13E-05 | 6.28E-76 | 43   | 1.15E-07 | 1.23E-58 | 58    | 2.53E-09 | 3.88E-51 |
| 13.1 | 0.00018194 | 1.40E-93 | 28.1 | 3.04E-05 | 9.57E-76 | 43.1 | 1.20E-07 | 1.65E-58 | 58.1  | 2.48E-09 | 4.03E-51 |
| 13.2 | 0.00018444 | 2.04E-93 | 28.2 | 2.98E-05 | 1.18E-75 | 43.2 | 1.14E-07 | 1.72E-58 | 58.2  | 2.40E-09 | 4.34E-51 |
| 13.3 | 0.00020369 | 2.93E-93 | 28.3 | 2.99E-05 | 1.70E-75 | 43.3 | 1.07E-07 | 1.91E-58 | 58.3  | 2.27E-09 | 5.29E-51 |
| 13.4 | 0.00021726 | 3.19E-93 | 28.4 | 3.04E-05 | 1.99E-75 | 43.4 | 1.05E-07 | 2.31E-58 | 58.4  | 2.27E-09 | 5.79E-51 |
| 13.5 | 0.00021646 | 4.34E-93 | 28.5 | 2.80E-05 | 4.88E-75 | 43.5 | 1.03E-07 | 3.04E-58 | 58.5  | 2.36E-09 | 6.89E-51 |
| 13.6 | 0.00019386 | 8.87E-93 | 28.6 | 2.58E-05 | 5.92E-75 | 43.6 | 9.75E-08 | 3.94E-58 | 58.6  | 2.31E-09 | 8.64E-51 |
| 13.7 | 0.00019075 | 8.46E-93 | 28.7 | 2.52E-05 | 8.48E-75 | 43.7 | 9.45E-08 | 5.50E-58 | 58.7  | 2.18E-09 | 9.99E-51 |
| 13.8 | 0.00019774 | 1.31E-92 | 28.8 | 2.44E-05 | 1.03E-74 | 43.8 | 9.06E-08 | 6.11E-58 | 58.8  | 2.20E-09 | 1.12E-50 |
| 13.9 | 0.00021012 | 1.84E-92 | 28.9 | 2.17E-05 | 1.24E-74 | 43.9 | 8.65E-08 | 7.45E-58 | 58.9  | 2.31E-09 | 1.48E-50 |
| 14   | 0.00021496 | 2.21E-92 | 29   | 1.99E-05 | 1.23E-74 | 44   | 8.32E-08 | 9.67E-58 | 59    | 2.29E-09 | 1.52E-50 |
| 14.1 | 0.00021744 | 3.18E-92 | 29.1 | 1.82E-05 | 1.51E-74 | 44.1 | 7.90E-08 | 1.22E-57 | 59.1  | 2.26E-09 | 1.61E-50 |
| 14.2 | 0.00022141 | 4.15E-92 | 29.2 | 1.59E-05 | 2.22E-74 | 44.2 | 7.83E-08 | 1.26E-57 | 59.2  | 2.24E-09 | 1.75E-50 |
| 14.3 | 0.00023681 | 5.27E-92 | 29.3 | 1.62E-05 | 2.96E-74 | 44.3 | 7.95E-08 | 1.54E-57 | 59.3  | 2.18E-09 | 1.93E-50 |
| 14.4 | 0.00023284 | 6.16E-92 | 29.4 | 1.45E-05 | 3.84E-74 | 44.4 | 7.77E-08 | 1.59E-57 | 59.4  | 2.19E-09 | 2.15E-50 |
| 14.5 | 0.000211   | 6.19E-92 | 29.5 | 1.40E-05 | 5.02E-74 | 44.5 | 7.44E-08 | 1.58E-57 | 59.5  | 2.13E-09 | 2.23E-50 |
| 14.6 | 0.00021772 | 7.65E-92 | 29.6 | 1.36E-05 | 6.77E-74 | 44.6 | 7.08E-08 | 1.61E-57 | 59.6  | 2.06E-09 | 2.61E-50 |
| 14.7 | 0.00023094 | 1.05E-91 | 29.7 | 1.33E-05 | 7.76E-74 | 44.7 | 7.10E-08 | 1.61E-57 | 59.7  | 1.87E-09 | 2.81E-50 |
| 14.8 | 0.00025614 | 1.30E-91 | 29.8 | 1.16E-05 | 9.46E-74 | 44.8 | 6.93E-08 | 1.76E-57 | 59.8  | 1.85E-09 | 2.79E-50 |
| 14.9 | 0.00024938 | 1.90E-91 | 29.9 | 1.03E-05 | 9.32E-74 | 44.9 | 6.91E-08 | 2.08E-57 | 59.9  | 1.74E-09 | 2.89E-50 |
| 60   | 1.61E-09   | 3.72E-50 | 75   | 1.01E-11 | 1.40E-40 | 90   | 2.66E-12 | 2.79E-32 | 105   | 8.52E-13 | 2.25E-30 |
| 60.1 | 1.64E-09   | 4.32E-50 | 75.1 | 9.56E-12 | 1.61E-40 | 90.1 | 2.54E-12 | 2.91E-32 | 105.1 | 9.02E-13 | 2.50E-30 |
| 60.2 | 1.68E-09   | 4.97E-50 | 75.2 | 9.37E-12 | 1.79E-40 | 90.2 | 2.47E-12 | 3.26E-32 | 105.2 | 9.06E-13 | 2.54E-30 |
| 60.3 | 1.62E-09   | 5.47E-50 | 75.3 | 9.14E-12 | 2.40E-40 | 90.3 | 2.45E-12 | 3.43E-32 | 105.3 | 8.97E-13 | 2.57E-30 |
| 60.4 | 1.73E-09   | 6.82E-50 | 75.4 | 8.96E-12 | 2.62E-40 | 90.4 | 2.45E-12 | 3.43E-32 | 105.4 | 8.76E-13 | 2.71E-30 |
| 60.5 | 1.62E-09   | 7.13E-50 | 75.5 | 8.96E-12 | 2.62E-40 | 90.5 | 2.31E-12 | 3.28E-32 | 105.5 | 8.70E-13 | 2.78E-30 |
| 60.6 | 1.54E-09   | 7.79E-50 | 75.6 | 8.73E-12 | 3.10E-40 | 90.6 | 2.30E-12 | 3.37E-32 | 105.6 | 8.70E-13 | 2.78E-30 |
| 60.7 | 1.60E-09   | 9.36E-50 | 75.7 | 8.45E-12 | 3.35E-40 | 90.7 | 2.27E-12 | 3.51E-32 | 105.7 | 8.70E-13 | 2.78E-30 |
| 60.8 | 1.70E-09   | 1.25E-49 | 75.8 | 8.49E-12 | 3.91E-40 | 90.8 | 2.18E-12 | 3.57E-32 | 105.8 | 8.69E-13 | 2.95E-30 |
| 60.9 | 1.70E-09   | 1.53E-49 | 75.9 | 7.92E-12 | 4.05E-40 | 90.9 | 2.10E-12 | 3.59E-32 | 105.9 | 8.71E-13 | 3.06E-30 |
| 61   | 1.70E-09   | 2.02E-49 | 76   | 8.08E-12 | 5.00E-40 | 91   | 2.02E-12 | 3.64E-32 | 106   | 8.53E-13 | 3.01E-30 |
| 61.1 | 1.62E-09   | 2.15E-49 | 76.1 | 7.95E-12 | 5.27E-40 | 91.1 | 1.98E-12 | 3.60E-32 | 106.1 | 8.95E-13 | 3.13E-30 |
| 61.2 | 1.60E-09   | 2.71E-49 | 76.2 | 7.83E-12 | 5.75E-40 | 91.2 | 1.98E-12 | 3.60E-32 | 106.2 | 8.95E-13 | 3.13E-30 |
| 61.3 | 1.56E-09   | 2.89E-49 | 76.3 | 7.96E-12 | 6.11E-40 | 91.3 | 1.94E-12 | 3.63E-32 | 106.3 | 9.36E-13 | 3.43E-30 |
| 61.4 | 1.49E-09   | 3.15E-49 | 76.4 | 7.85E-12 | 7.06E-40 | 91.4 | 1.83E-12 | 3.75E-32 | 106.4 | 9.54E-13 | 3.67E-30 |
| 61.5 | 1.53E-09   | 3.56E-49 | 76.5 | 7.47E-12 | 8.07E-40 | 91.5 | 1.82E-12 | 3.71E-32 | 106.5 | 9.81E-13 | 4.28E-30 |
| 61.6 | 1.47E-09   | 3.76E-49 | 76.6 | 7.05E-12 | 8.56E-40 | 91.6 | 1.84E-12 | 3.93E-32 | 106.6 | 1.03E-12 | 4.68E-30 |
| 61.7 | 1.27E-09   | 4.54E-49 | 76.7 | 6.61E-12 | 1.04E-39 | 91.7 | 1.87E-12 | 4.15E-32 | 106.7 | 1.16E-12 | 5.74E-30 |
| 61.8 | 1.28E-09   | 5.53E-49 | 76.8 | 6.60E-12 | 1.19E-39 | 91.8 | 1.87E-12 | 4.15E-32 | 106.8 | 1.11E-12 | 5.65E-30 |
| 61.9 | 1.17E-09   | 5.95E-49 | 76.9 | 6.70E-12 | 1.52E-39 | 91.9 | 1.84E-12 | 4.34E-32 | 106.9 | 1.15E-12 | 6.05E-30 |
| 62   | 1.21E-09   | 7.47E-49 | 77   | 6.66E-12 | 1.67E-39 | 92   | 1.72E-12 | 4.72E-32 | 107   | 1.14E-12 | 6.33E-30 |
| 62.1 | 1.06E-09   | 8.31E-49 | 77.1 | 6.72E-12 | 1.76E-39 | 92.1 | 1.70E-12 | 4.78E-32 | 107.1 | 1.22E-12 | 7.33E-30 |
| 62.2 | 1.10E-09   | 1.07E-48 | 77.2 | 6.72E-12 | 1.76E-39 | 92.2 | 1.64E-12 | 4.64E-32 | 107.2 | 1.22E-12 | 7.33E-30 |
| 62.3 | 1.07E-09   | 1.22E-48 | 77.3 | 6.36E-12 | 1.89E-39 | 92.3 | 1.57E-12 | 4.67E-32 | 107.3 | 1.20E-12 | 7.34E-30 |
| 62.4 | 1.01E-09   | 1.69E-48 | 77.4 | 6.34E-12 | 1.92E-39 | 92.4 | 1.54E-12 | 5.02E-32 | 107.4 | 1.22E-12 | 7.77E-30 |
| 62.5 | 1.01E-09   | 2.17E-48 | 77.5 | 6.30E-12 | 2.07E-39 | 92.5 | 1.51E-12 | 5.23E-32 | 107.5 | 1.20E-12 | 7.78E-30 |
| 62.6 | 1.04E-09   | 3.33E-48 | 77.6 | 5.92E-12 | 2.28E-39 | 92.6 | 1.54E-12 | 5.31E-32 | 107.6 | 1.20E-12 | 7.78E-30 |
| 62.7 | 1.01E-09   | 4.95E-48 | 77.7 | 5.59E-12 | 2.41E-39 | 92.7 | 1.54E-12 | 5.31E-32 | 107.7 | 1.20E-12 | 7.97E-30 |
| 62.8 | 9.96E-10   | 7.85E-48 | 77.8 | 5.46E-12 | 2.98E-39 | 92.8 | 1.45E-12 | 5.65E-32 | 107.8 | 1.19E-12 | 8.71E-30 |
| 62.9 | 9.59E-10   | 9.44E-48 | 77.9 | 5.42E-12 | 3.43E-39 | 92.9 | 1.45E-12 | 5.65E-32 | 107.9 | 1.19E-12 | 8.84E-30 |
| 63   | 9.12E-10   | 1.28E-47 | 78   | 5.63E-12 | 4.14E-39 | 93   | 1.40E-12 | 5.66E-32 | 108   | 1.25E-12 | 9.58E-30 |
| 63.1 | 8.50E-10   | 1.46E-47 | 78.1 | 5.84E-12 | 4.64E-39 | 93.1 | 1.36E-12 | 5.72E-32 | 108.1 | 1.25E-12 | 9.58E-30 |
| 63.2 | 7.87E-10   | 1.65E-47 | 78.2 | 6.00E-12 | 6.03E-39 | 93.2 | 1.34E-12 | 5.86E-32 | 108.2 | 1.21E-12 | 9.66E-30 |
| 63.3 | 7.14E-10   | 1.95E-47 | 78.3 | 5.71E-12 | 6.99E-39 | 93.3 | 1.29E-12 | 5.92E-32 | 108.3 | 1.20E-12 | 1.02E-29 |
| 63.4 | 6.76E-10   | 2.20E-47 | 78.4 | 5.36E-12 | 7.07E-39 | 93.4 | 1.33E-12 | 6.61E-32 | 108.4 | 1.20E-12 | 1.05E-29 |
| 63.5 | 6.46E-10   | 2.39E-47 | 78.5 | 5.35E-12 | 8.71E-39 | 93.5 | 1.32E-12 | 7.02E-32 | 108.5 | 1.16E-12 | 1.07E-29 |
| 63.6 | 5.81E-10   | 2.52E-47 | 78.6 | 5.33E-12 | 1.05E-38 | 93.6 | 1.19E-12 | 7.77E-32 | 108.6 | 1.15E-12 | 1.15E-29 |
| 63.7 | 5.60E-10   | 2.60E-47 | 78.7 | 5.19E-12 | 1.14E-38 | 93.7 | 1.16E-12 | 7.87E-32 | 108.7 | 1.13E-12 | 1.12E-29 |
| 63.8 | 5.44E-10   | 2.96E-47 | 78.8 | 5.12E-12 | 1.39E-38 | 93.8 | 1.11E-12 | 7.84E-32 | 108.8 | 1.14E-12 | 1.25E-29 |
| 63.9 | 5.47E-10   | 3.37E-47 | 78.9 | 5.34E-12 | 1.49E-38 | 93.9 | 1.03E-12 | 8.00E-32 | 108.9 | 1.18E-12 | 1.31E-29 |
| 64   | 4.98E-10   | 4.25E-47 | 79   | 4.97E-12 | 1.60E-38 | 94   | 1.03E-12 | 8.00E-32 | 109   | 1.18E-12 | 1.31E-29 |
| 64.1 | 4.37E-10   | 6.01E-47 | 79.1 | 5.21E-12 | 2.01E-38 | 94.1 | 1.04E-12 | 8.72E-32 | 109.1 | 1.18E-12 | 1.34E-29 |
| 64.2 | 4.28E-10   | 6.54E-47 | 79.2 | 5.15E-12 | 2.64E-38 | 94.2 | 1.09E-12 | 8.77E-32 | 109.2 | 1.21E-12 | 1.47E-29 |
| 64.3 | 4.03E-10   | 6.27E-47 | 79.3 | 5.33E-12 | 3.54E-38 | 94.3 | 9.67E-13 | 9.64E-32 | 109.3 | 1.20E-12 | 1.48E-29 |
| 64.4 | 3.71E-10   | 7.25E-47 | 79.4 | 5.37E-12 | 5.27E-38 | 94.4 | 1.03E-12 | 1.02E-31 | 109.4 | 1.20E-12 | 1.48E-29 |
| 64.5 | 3.44E-10   | 7.30E-47 | 79.5 | 5.29E-12 | 6.33E-38 | 94.5 | 1.03E-12 | 1.05E-31 | 109.5 | 1.17E-12 | 1.49E-29 |
| 64.6 | 3.29E-10   | 7.60E-47 | 79.6 | 5.25E-12 | 6.82E-38 | 94.6 | 1.01E-12 | 1.02E-31 | 109.6 | 1.17E-12 | 1.51E-29 |
| 64.7 | 3.20E-10   | 1.02E-46 | 79.7 | 5.42E-12 | 9.87E-38 | 94.7 | 1.03E-12 | 1.12E-31 | 109.7 | 1.13E-12 | 1.46E-29 |
| 64.8 | 3.17E-10   | 1.17E-46 | 79.8 | 6.01E-12 | 1.23E-37 | 94.8 | 9.49E-13 | 9.49E-31 | 109.8 | 1.13E-12 | 1.46E-29 |
| 64.9 | 2.98E-10   | 1.47E-46 | 79.9 | 5.85E-12 | 1.63E-37 | 94.9 | 9.94E-13 | 1.20E-31 | 109.9 | 1.13E-12 | 1.46E-29 |
| 65   | 2.99E-10   | 1.73E-46 | 80   | 5.85E-12 | 1.63E-37 | 95   | 9.55E-13 | 1.22E-31 | 110   | 1.13E-12 | 1.46E-29 |
| 65.1 | 2.83E-10   | 1.79E-46 | 80.1 | 6.22E-12 | 2.45E-37 | 95.1 | 9.55E-13 | 1.30E-31 | 110.1 | 1.13E-12 | 1.46E-29 |
| 65.2 | 2.48E-10   | 1.78E-46 | 80.2 | 6.28E-12 | 3.32E-37 | 95.2 | 9.79E-13 | 1.35E-31 | 110.2 | 1.08E-12 | 1.42E-29 |
| 65.3 | 2.21E-10   | 2.04E-46 | 80.3 | 5.94E-12 | 3.69E-37 | 95.3 | 9.74E-13 | 1.40E-31 | 110.3 | 1.08E-   |          |



|       |          |          |       |          |          |       |          |          |       |          |          |
|-------|----------|----------|-------|----------|----------|-------|----------|----------|-------|----------|----------|
| 69    | 3.57E-11 | 1.70E-44 | 84    | 5.75E-12 | 6.51E-35 | 99    | 7.87E-13 | 4.90E-31 | 114   | 7.50E-13 | 4.13E-29 |
| 69.1  | 3.49E-11 | 2.02E-44 | 84.1  | 5.78E-12 | 7.71E-35 | 99.1  | 7.74E-13 | 5.28E-31 | 114.1 | 7.62E-13 | 4.26E-29 |
| 69.2  | 3.35E-11 | 2.35E-44 | 84.2  | 5.86E-12 | 7.99E-35 | 99.2  | 7.82E-13 | 5.63E-31 | 114.2 | 7.55E-13 | 4.35E-29 |
| 69.3  | 3.34E-11 | 3.02E-44 | 84.3  | 5.69E-12 | 8.20E-35 | 99.3  | 7.77E-13 | 5.86E-31 | 114.3 | 7.55E-13 | 4.35E-29 |
| 69.4  | 3.18E-11 | 3.22E-44 | 84.4  | 5.53E-12 | 8.82E-35 | 99.4  | 7.53E-13 | 6.50E-31 | 114.4 | 7.32E-13 | 4.25E-29 |
| 69.5  | 3.14E-11 | 4.12E-44 | 84.5  | 5.67E-12 | 9.86E-35 | 99.5  | 7.53E-13 | 6.50E-31 | 114.5 | 7.13E-13 | 4.17E-29 |
| 69.6  | 3.07E-11 | 4.48E-44 | 84.6  | 5.87E-12 | 1.29E-34 | 99.6  | 7.39E-13 | 6.62E-31 | 114.6 | 7.05E-13 | 4.10E-29 |
| 69.7  | 3.03E-11 | 4.55E-44 | 84.7  | 5.52E-12 | 1.46E-34 | 99.7  | 7.86E-13 | 8.12E-31 | 114.7 | 7.05E-13 | 4.10E-29 |
| 69.8  | 2.93E-11 | 4.79E-44 | 84.8  | 5.27E-12 | 2.04E-34 | 99.8  | 7.83E-13 | 9.66E-31 | 114.8 | 7.11E-13 | 4.71E-29 |
| 69.9  | 2.86E-11 | 5.79E-44 | 84.9  | 5.43E-12 | 2.22E-34 | 99.9  | 7.52E-13 | 1.01E-30 | 114.9 | 6.88E-13 | 4.70E-29 |
| 70    | 2.71E-11 | 6.11E-44 | 85    | 5.52E-12 | 2.35E-34 | 100   | 7.52E-13 | 1.01E-30 | 115   | 6.66E-13 | 5.12E-29 |
| 70.1  | 2.73E-11 | 7.98E-44 | 85.1  | 5.14E-12 | 2.54E-34 | 100.1 | 7.46E-13 | 1.07E-30 | 115.1 | 6.52E-13 | 5.19E-29 |
| 70.2  | 2.66E-11 | 9.15E-44 | 85.2  | 5.00E-12 | 3.09E-34 | 100.2 | 7.46E-13 | 1.07E-30 | 115.2 | 6.52E-13 | 5.19E-29 |
| 70.3  | 2.56E-11 | 1.05E-43 | 85.3  | 4.99E-12 | 3.47E-34 | 100.3 | 7.92E-13 | 1.32E-30 | 115.3 | 6.20E-13 | 5.08E-29 |
| 70.4  | 2.44E-11 | 1.20E-43 | 85.4  | 4.92E-12 | 3.97E-34 | 100.4 | 7.85E-13 | 1.31E-30 | 115.4 | 6.10E-13 | 5.10E-29 |
| 70.5  | 2.23E-11 | 1.63E-43 | 85.5  | 5.02E-12 | 4.66E-34 | 100.5 | 7.85E-13 | 1.31E-30 | 115.5 | 5.93E-13 | 5.30E-29 |
| 70.6  | 2.22E-11 | 1.79E-43 | 85.6  | 4.70E-12 | 4.73E-34 | 100.6 | 7.85E-13 | 1.31E-30 | 115.6 | 5.69E-13 | 5.19E-29 |
| 70.7  | 2.26E-11 | 2.07E-43 | 85.7  | 4.69E-12 | 5.58E-34 | 100.7 | 7.86E-13 | 1.47E-30 | 115.7 | 5.63E-13 | 5.65E-29 |
| 70.8  | 2.24E-11 | 2.24E-43 | 85.8  | 4.74E-12 | 6.61E-34 | 100.8 | 8.07E-13 | 1.53E-30 | 115.8 | 5.56E-13 | 5.77E-29 |
| 70.9  | 2.30E-11 | 3.06E-43 | 85.9  | 4.88E-12 | 9.19E-34 | 100.9 | 8.07E-13 | 1.53E-30 | 115.9 | 5.20E-13 | 5.73E-29 |
| 71    | 2.29E-11 | 3.19E-43 | 86    | 4.79E-12 | 1.12E-33 | 101   | 7.71E-13 | 1.48E-30 | 116   | 5.20E-13 | 5.73E-29 |
| 71.1  | 2.21E-11 | 3.89E-43 | 86.1  | 4.40E-12 | 1.26E-33 | 101.1 | 7.71E-13 | 1.48E-30 | 116.1 | 5.20E-13 | 5.73E-29 |
| 71.2  | 2.17E-11 | 4.61E-43 | 86.2  | 4.61E-12 | 1.54E-33 | 101.2 | 7.38E-13 | 1.44E-30 | 116.2 | 5.24E-13 | 5.74E-29 |
| 71.3  | 2.10E-11 | 5.29E-43 | 86.3  | 4.38E-12 | 1.65E-33 | 101.3 | 7.33E-13 | 1.47E-30 | 116.3 | 5.23E-13 | 5.85E-29 |
| 71.4  | 2.03E-11 | 5.81E-43 | 86.4  | 4.31E-12 | 1.82E-33 | 101.4 | 7.33E-13 | 1.47E-30 | 116.4 | 5.23E-13 | 6.07E-29 |
| 71.5  | 2.06E-11 | 6.81E-43 | 86.5  | 4.12E-12 | 1.92E-33 | 101.5 | 7.33E-13 | 1.47E-30 | 116.5 | 5.12E-13 | 6.09E-29 |
| 71.6  | 2.02E-11 | 7.21E-43 | 86.6  | 4.21E-12 | 2.38E-33 | 101.6 | 7.33E-13 | 1.47E-30 | 116.6 | 5.18E-13 | 6.35E-29 |
| 71.7  | 1.93E-11 | 8.58E-43 | 86.7  | 4.37E-12 | 2.78E-33 | 101.7 | 7.33E-13 | 1.47E-30 | 116.7 | 4.99E-13 | 6.21E-29 |
| 71.8  | 1.90E-11 | 9.44E-43 | 86.8  | 4.16E-12 | 2.50E-33 | 101.8 | 7.12E-13 | 1.45E-30 | 116.8 | 4.66E-13 | 5.73E-29 |
| 71.9  | 2.00E-11 | 1.02E-42 | 86.9  | 4.18E-12 | 2.75E-33 | 101.9 | 7.12E-13 | 1.45E-30 | 116.9 | 4.66E-13 | 5.73E-29 |
| 72    | 1.85E-11 | 1.18E-42 | 87    | 4.04E-12 | 2.74E-33 | 102   | 7.12E-13 | 1.45E-30 | 117   | 4.56E-13 | 6.09E-29 |
| 72.1  | 1.86E-11 | 1.39E-42 | 87.1  | 4.08E-12 | 2.84E-33 | 102.1 | 7.03E-13 | 1.47E-30 | 117.1 | 4.46E-13 | 6.31E-29 |
| 72.2  | 1.85E-11 | 1.62E-42 | 87.2  | 3.80E-12 | 3.19E-33 | 102.2 | 7.03E-13 | 1.47E-30 | 117.2 | 4.46E-13 | 6.31E-29 |
| 72.3  | 1.80E-11 | 1.92E-42 | 87.3  | 3.54E-12 | 3.34E-33 | 102.3 | 6.95E-13 | 1.47E-30 | 117.3 | 4.43E-13 | 6.41E-29 |
| 72.4  | 1.73E-11 | 1.96E-42 | 87.4  | 3.54E-12 | 3.34E-33 | 102.4 | 7.35E-13 | 1.55E-30 | 117.4 | 4.43E-13 | 6.41E-29 |
| 72.5  | 1.71E-11 | 2.24E-42 | 87.5  | 3.56E-12 | 3.48E-33 | 102.5 | 7.42E-13 | 1.55E-30 | 117.5 | 4.49E-13 | 6.65E-29 |
| 72.6  | 1.65E-11 | 2.57E-42 | 87.6  | 3.36E-12 | 3.80E-33 | 102.6 | 7.25E-13 | 1.54E-30 | 117.6 | 4.38E-13 | 6.91E-29 |
| 72.7  | 1.57E-11 | 3.14E-42 | 87.7  | 3.36E-12 | 4.00E-33 | 102.7 | 7.51E-13 | 1.54E-30 | 117.7 | 4.33E-13 | 7.31E-29 |
| 72.8  | 1.55E-11 | 3.54E-42 | 87.8  | 3.50E-12 | 5.36E-33 | 102.8 | 7.16E-13 | 1.55E-30 | 117.8 | 4.23E-13 | 7.41E-29 |
| 72.9  | 1.50E-11 | 3.91E-42 | 87.9  | 3.34E-12 | 6.01E-33 | 102.9 | 7.16E-13 | 1.55E-30 | 117.9 | 4.21E-13 | 7.38E-29 |
| 73    | 1.55E-11 | 4.77E-42 | 88    | 3.36E-12 | 6.99E-33 | 103   | 7.16E-13 | 1.55E-30 | 118   | 4.17E-13 | 7.64E-29 |
| 73.1  | 1.55E-11 | 4.77E-42 | 88.1  | 3.27E-12 | 7.61E-33 | 103.1 | 7.00E-13 | 1.57E-30 | 118.1 | 4.17E-13 | 7.64E-29 |
| 73.2  | 1.49E-11 | 5.54E-42 | 88.2  | 3.38E-12 | 8.75E-33 | 103.2 | 7.00E-13 | 1.57E-30 | 118.2 | 4.17E-13 | 7.64E-29 |
| 73.3  | 1.42E-11 | 6.32E-42 | 88.3  | 3.35E-12 | 8.55E-33 | 103.3 | 7.00E-13 | 1.57E-30 | 118.3 | 4.09E-13 | 7.94E-29 |
| 73.4  | 1.39E-11 | 9.52E-42 | 88.4  | 3.27E-12 | 8.84E-33 | 103.4 | 7.40E-13 | 1.69E-30 | 118.4 | 3.91E-13 | 8.22E-29 |
| 73.5  | 1.35E-11 | 1.11E-41 | 88.5  | 3.03E-12 | 1.02E-32 | 103.5 | 7.57E-13 | 1.75E-30 | 118.5 | 3.88E-13 | 8.47E-29 |
| 73.6  | 1.41E-11 | 1.35E-41 | 88.6  | 3.06E-12 | 1.15E-32 | 103.6 | 7.49E-13 | 1.81E-30 | 118.6 | 3.89E-13 | 8.38E-29 |
| 73.7  | 1.36E-11 | 1.40E-41 | 88.7  | 3.16E-12 | 1.24E-32 | 103.7 | 7.89E-13 | 1.89E-30 | 118.7 | 3.92E-13 | 8.53E-29 |
| 73.8  | 1.32E-11 | 1.57E-41 | 88.8  | 2.99E-12 | 1.36E-32 | 103.8 | 7.71E-13 | 1.92E-30 | 118.8 | 3.97E-13 | 9.09E-29 |
| 73.9  | 1.22E-11 | 1.64E-41 | 88.9  | 2.92E-12 | 1.43E-32 | 103.9 | 7.71E-13 | 1.92E-30 | 118.9 | 3.82E-13 | 9.67E-29 |
| 74    | 1.16E-11 | 1.79E-41 | 89    | 2.94E-12 | 1.54E-32 | 104   | 7.59E-13 | 1.95E-30 | 119   | 3.80E-13 | 9.64E-29 |
| 74.1  | 1.13E-11 | 2.20E-41 | 89.1  | 2.82E-12 | 1.59E-32 | 104.1 | 7.59E-13 | 1.95E-30 | 119.1 | 3.90E-13 | 1.02E-28 |
| 74.2  | 1.11E-11 | 2.28E-41 | 89.2  | 2.82E-12 | 1.74E-32 | 104.2 | 7.63E-13 | 1.99E-30 | 119.2 | 3.84E-13 | 1.08E-28 |
| 74.3  | 1.08E-11 | 2.71E-41 | 89.3  | 2.66E-12 | 1.64E-32 | 104.3 | 7.43E-13 | 2.02E-30 | 119.3 | 3.84E-13 | 1.08E-28 |
| 74.4  | 1.10E-11 | 3.42E-41 | 89.4  | 2.67E-12 | 1.68E-32 | 104.4 | 8.03E-13 | 2.17E-30 | 119.4 | 3.71E-13 | 1.12E-28 |
| 74.5  | 1.09E-11 | 3.84E-41 | 89.5  | 2.50E-12 | 1.88E-32 | 104.5 | 8.03E-13 | 2.17E-30 | 119.5 | 3.68E-13 | 1.18E-28 |
| 74.6  | 1.08E-11 | 6.47E-41 | 89.6  | 2.72E-12 | 2.20E-32 | 104.6 | 8.37E-13 | 2.25E-30 | 119.6 | 3.65E-13 | 1.21E-28 |
| 74.7  | 1.08E-11 | 8.30E-41 | 89.7  | 2.79E-12 | 2.33E-32 | 104.7 | 8.37E-13 | 2.25E-30 | 119.7 | 3.58E-13 | 1.17E-28 |
| 74.8  | 1.07E-11 | 8.65E-41 | 89.8  | 2.66E-12 | 2.50E-32 | 104.8 | 8.53E-13 | 2.30E-30 | 119.8 | 3.57E-13 | 1.23E-28 |
| 74.9  | 1.04E-11 | 1.08E-40 | 89.9  | 2.59E-12 | 2.46E-32 | 104.9 | 8.53E-13 | 2.30E-30 | 119.9 | 3.58E-13 | 1.24E-28 |
| 120   | 3.63E-13 | 1.30E-28 | 135   | 8.70E-13 | 1.04E-24 | 150   | 4.88E-13 | 3.52E-23 | 165   | 2.34E-13 | 8.95E-23 |
| 120.1 | 3.73E-13 | 1.47E-28 | 135.1 | 8.56E-13 | 1.04E-24 | 150.1 | 4.89E-13 | 3.53E-23 | 165.1 | 2.32E-13 | 8.69E-23 |
| 120.2 | 3.82E-13 | 1.59E-28 | 135.2 | 8.56E-13 | 1.18E-24 | 150.2 | 4.89E-13 | 3.53E-23 | 165.2 | 2.34E-13 | 8.69E-23 |
| 120.3 | 3.75E-13 | 1.62E-28 | 135.3 | 8.43E-13 | 1.19E-24 | 150.3 | 4.89E-13 | 3.53E-23 | 165.3 | 2.34E-13 | 8.69E-23 |
| 120.4 | 3.75E-13 | 1.62E-28 | 135.4 | 8.32E-13 | 1.28E-24 | 150.4 | 4.89E-13 | 3.53E-23 | 165.4 | 2.34E-13 | 8.69E-23 |
| 120.5 | 3.83E-13 | 1.68E-28 | 135.5 | 8.31E-13 | 1.29E-24 | 150.5 | 4.89E-13 | 3.53E-23 | 165.5 | 2.34E-13 | 8.69E-23 |
| 120.6 | 3.81E-13 | 1.98E-28 | 135.6 | 8.14E-13 | 1.34E-24 | 150.6 | 4.89E-13 | 3.53E-23 | 165.6 | 2.34E-13 | 8.69E-23 |
| 120.7 | 3.85E-13 | 2.04E-28 | 135.7 | 8.14E-13 | 1.34E-24 | 150.7 | 4.89E-13 | 3.53E-23 | 165.7 | 2.37E-13 | 8.90E-23 |
| 120.8 | 3.79E-13 | 2.22E-28 | 135.8 | 8.14E-13 | 1.45E-24 | 150.8 | 4.89E-13 | 3.53E-23 | 165.8 | 2.37E-13 | 8.90E-23 |
| 120.9 | 3.74E-13 | 2.45E-28 | 135.9 | 8.22E-13 | 1.57E-24 | 150.9 | 4.75E-13 | 3.47E-23 | 165.9 | 2.31E-13 | 8.87E-23 |
| 121   | 3.91E-13 | 2.54E-28 | 136   | 8.15E-13 | 1.67E-24 | 151   | 4.75E-13 | 3.47E-23 | 166   | 2.32E-13 | 9.24E-23 |
| 121.1 | 3.91E-13 | 2.57E-28 | 136.1 | 8.15E-13 | 1.67E-24 | 151.1 | 4.75E-13 | 3.47E-23 | 166.1 | 2.32E-13 | 9.24E-23 |
| 121.2 | 3.88E-13 | 2.73E-28 | 136.2 | 8.27E-13 | 1.92E-24 | 151.2 | 4.60E-13 | 3.52E-23 | 166.2 | 2.32E-13 | 9.24E-23 |
| 121.3 | 4.04E-13 | 3.11E-28 | 136.3 | 8.10E-13 | 2.00E-24 | 151.3 | 4.55E-13 | 3.62E-23 | 166.3 | 2.27E-13 | 9.22E-23 |
| 121.4 | 4.03E-13 | 3.05E-28 | 136.4 | 7.68E-13 | 2.13E-24 | 151.4 | 4.56E-13 | 3.62E-23 | 166.4 | 2.27E-13 | 9.22E-23 |
| 121.5 | 3.86E-13 | 3.03E-28 | 136.5 | 7.64E-13 | 2.25E-24 | 151.5 | 4.56E-13 | 3.62E-23 | 166.5 | 2.24E-13 | 1.03E-22 |
| 121.6 | 3.93E-13 | 2.99E-28 | 136.6 | 7.78E-13 | 2.41E-24 | 151.6 | 4.42E-13 | 3.63E-23 | 166.6 | 2.24E-13 | 1.03E-22 |
| 121.7 | 3.72E-13 | 3.07E-28 | 136.7 | 7.84E-13 | 2.46E-24 | 151.7 | 4.37E-13 | 3.65E-23 | 166.7 | 2.24E-13 | 1.03E-22 |
| 121.8 | 3.76E-13 | 3.42E-28 | 136.8 | 7.92E-13 | 2.48E-24 | 151.8 | 4.29E-13 | 3.74E-23 | 166.8 | 2.24E-13 | 1.03E-22 |
| 121.9 | 3.87E-13 | 3.51E-28 | 136.9 | 7.55E-13 | 2.58E-24 | 151.9 | 4.29E-13 | 3.74E-23 | 166.9 | 2.21E-13 | 1.04E-22 |
| 122   | 3.82E-13 | 3.72E-28 | 137   | 7.55E-13 | 2.58E-24 | 152   | 4.29E-13 | 3.74E-23 | 167   | 2.21E-13 | 1.04E-22 |
| 122.1 | 3.69E-13 | 3.63E-28 | 137.1 | 7.37E-13 | 2.68E-24 | 152.1 | 4.29E-13 | 3.74E-23 | 167.1 | 2.18E-13 | 1.09E-22 |
| 122.2 | 3.73E-13 | 3.78E-28 | 137.2 | 7.22E-13 | 2.67E-24 | 152.2 | 4.29E-13 | 3.74E-23 | 167.2 | 2.18E-13 | 1.09E-22 |
| 122.3 | 3.70E-13 | 3.96E-28 | 137.3 | 7.24E-13 | 2.77E-24 | 152.3 | 4.21E-13 | 3.78E-23 | 167.3 | 2.18E-13 | 1.09E-22 |
| 122.4 | 3.75E-13 | 4.2      |       |          |          |       |          |          |       |          |          |

|       |          |          |       |          |          |       |          |          |       |          |          |
|-------|----------|----------|-------|----------|----------|-------|----------|----------|-------|----------|----------|
| 126.1 | 3.29E-13 | 1.45E-27 | 141.1 | 6.03E-13 | 6.53E-24 | 156.1 | 3.57E-13 | 5.53E-23 | 171.1 | 1.97E-13 | 1.34E-22 |
| 126.2 | 3.29E-13 | 1.45E-27 | 141.2 | 6.03E-13 | 6.53E-24 | 156.2 | 3.57E-13 | 5.53E-23 | 171.2 | 1.97E-13 | 1.34E-22 |
| 126.3 | 3.29E-13 | 1.45E-27 | 141.3 | 5.99E-13 | 6.77E-24 | 156.3 | 3.49E-13 | 5.59E-23 | 171.3 | 1.92E-13 | 1.35E-22 |
| 126.4 | 3.29E-13 | 1.45E-27 | 141.4 | 5.64E-13 | 6.52E-24 | 156.4 | 3.49E-13 | 5.59E-23 | 171.4 | 1.87E-13 | 1.34E-22 |
| 126.5 | 3.20E-13 | 1.51E-27 | 141.5 | 5.64E-13 | 6.52E-24 | 156.5 | 3.49E-13 | 5.59E-23 | 171.5 | 1.87E-13 | 1.34E-22 |
| 126.6 | 3.34E-13 | 1.60E-27 | 141.6 | 5.64E-13 | 6.52E-24 | 156.6 | 3.49E-13 | 5.59E-23 | 171.6 | 1.87E-13 | 1.34E-22 |
| 126.7 | 3.34E-13 | 1.60E-27 | 141.7 | 5.64E-13 | 6.52E-24 | 156.7 | 3.49E-13 | 5.59E-23 | 171.7 | 1.78E-13 | 1.37E-22 |
| 126.8 | 3.34E-13 | 1.60E-27 | 141.8 | 5.62E-13 | 6.74E-24 | 156.8 | 3.49E-13 | 5.59E-23 | 171.8 | 1.77E-13 | 1.38E-22 |
| 126.9 | 3.42E-13 | 1.72E-27 | 141.9 | 5.67E-13 | 6.90E-24 | 156.9 | 3.49E-13 | 5.59E-23 | 171.9 | 1.77E-13 | 1.38E-22 |
| 127   | 3.29E-13 | 1.85E-27 | 142   | 5.67E-13 | 6.90E-24 | 157   | 3.49E-13 | 5.59E-23 | 172   | 1.79E-13 | 1.38E-22 |
| 127.1 | 3.25E-13 | 2.00E-27 | 142.1 | 5.75E-13 | 7.12E-24 | 157.1 | 3.49E-13 | 5.59E-23 | 172.1 | 1.79E-13 | 1.38E-22 |
| 127.2 | 3.31E-13 | 2.28E-27 | 142.2 | 5.74E-13 | 7.46E-24 | 157.2 | 3.43E-13 | 5.55E-23 | 172.2 | 1.79E-13 | 1.38E-22 |
| 127.3 | 3.26E-13 | 2.29E-27 | 142.3 | 5.76E-13 | 7.72E-24 | 157.3 | 3.43E-13 | 5.55E-23 | 172.3 | 1.79E-13 | 1.38E-22 |
| 127.4 | 3.27E-13 | 2.56E-27 | 142.4 | 5.63E-13 | 8.03E-24 | 157.4 | 3.41E-13 | 5.49E-23 | 172.4 | 1.79E-13 | 1.38E-22 |
| 127.5 | 3.24E-13 | 2.72E-27 | 142.5 | 5.63E-13 | 8.03E-24 | 157.5 | 3.35E-13 | 5.56E-23 | 172.5 | 1.79E-13 | 1.38E-22 |
| 127.6 | 3.18E-13 | 2.78E-27 | 142.6 | 5.50E-13 | 8.25E-24 | 157.6 | 3.35E-13 | 5.56E-23 | 172.6 | 1.79E-13 | 1.38E-22 |
| 127.7 | 3.28E-13 | 2.78E-27 | 142.7 | 5.50E-13 | 8.25E-24 | 157.7 | 3.35E-13 | 5.56E-23 | 172.7 | 1.79E-13 | 1.38E-22 |
| 127.8 | 3.29E-13 | 2.89E-27 | 142.8 | 5.49E-13 | 8.32E-24 | 157.8 | 3.28E-13 | 5.69E-23 | 172.8 | 1.75E-13 | 1.36E-22 |
| 127.9 | 3.29E-13 | 2.89E-27 | 142.9 | 5.49E-13 | 8.32E-24 | 157.9 | 3.28E-13 | 5.69E-23 | 172.9 | 1.70E-13 | 1.33E-22 |
| 128   | 3.15E-13 | 3.17E-27 | 143   | 5.40E-13 | 8.63E-24 | 158   | 3.23E-13 | 5.76E-23 | 173   | 1.68E-13 | 1.43E-22 |
| 128.1 | 3.18E-13 | 3.31E-27 | 143.1 | 5.40E-13 | 8.63E-24 | 158.1 | 3.23E-13 | 5.76E-23 | 173.1 | 1.65E-13 | 1.40E-22 |
| 128.2 | 3.31E-13 | 3.69E-27 | 143.2 | 5.40E-13 | 8.63E-24 | 158.2 | 3.23E-13 | 5.76E-23 | 173.2 | 1.65E-13 | 1.40E-22 |
| 128.3 | 3.11E-13 | 3.93E-27 | 143.3 | 5.36E-13 | 8.74E-24 | 158.3 | 3.23E-13 | 5.76E-23 | 173.3 | 1.63E-13 | 1.41E-22 |
| 128.4 | 3.16E-13 | 4.26E-27 | 143.4 | 5.23E-13 | 8.80E-24 | 158.4 | 3.22E-13 | 6.03E-23 | 173.4 | 1.57E-13 | 1.40E-22 |
| 128.5 | 3.27E-13 | 4.48E-27 | 143.5 | 5.23E-13 | 8.80E-24 | 158.5 | 3.14E-13 | 6.13E-23 | 173.5 | 1.57E-13 | 1.40E-22 |
| 128.6 | 3.19E-13 | 4.49E-27 | 143.6 | 5.29E-13 | 9.08E-24 | 158.6 | 3.30E-13 | 6.32E-23 | 173.6 | 1.55E-13 | 1.43E-22 |
| 128.7 | 3.19E-13 | 4.49E-27 | 143.7 | 5.29E-13 | 9.08E-24 | 158.7 | 3.23E-13 | 6.41E-23 | 173.7 | 1.54E-13 | 1.48E-22 |
| 128.8 | 3.29E-13 | 4.98E-27 | 143.8 | 5.29E-13 | 9.27E-24 | 158.8 | 3.11E-13 | 6.24E-23 | 173.8 | 1.54E-13 | 1.48E-22 |
| 128.9 | 3.29E-13 | 4.94E-27 | 143.9 | 5.28E-13 | 9.27E-24 | 158.9 | 3.11E-13 | 6.24E-23 | 173.9 | 1.54E-13 | 1.48E-22 |
| 129   | 3.34E-13 | 5.47E-27 | 144   | 5.12E-13 | 9.42E-24 | 159   | 3.11E-13 | 6.24E-23 | 174   | 1.54E-13 | 1.48E-22 |
| 129.1 | 3.37E-13 | 5.62E-27 | 144.1 | 5.19E-13 | 9.84E-24 | 159.1 | 3.11E-13 | 6.24E-23 | 174.1 | 1.52E-13 | 1.50E-22 |
| 129.2 | 3.43E-13 | 5.75E-27 | 144.2 | 5.19E-13 | 9.84E-24 | 159.2 | 3.11E-13 | 6.24E-23 | 174.2 | 1.52E-13 | 1.50E-22 |
| 129.3 | 3.56E-13 | 6.40E-27 | 144.3 | 5.25E-13 | 1.03E-23 | 159.3 | 3.11E-13 | 6.24E-23 | 174.3 | 1.50E-13 | 1.55E-22 |
| 129.4 | 3.50E-13 | 6.59E-27 | 144.4 | 5.14E-13 | 1.07E-23 | 159.4 | 3.11E-13 | 6.24E-23 | 174.4 | 1.52E-13 | 1.50E-22 |
| 129.5 | 3.50E-13 | 6.59E-27 | 144.5 | 5.14E-13 | 1.07E-23 | 159.5 | 3.11E-13 | 6.24E-23 | 174.5 | 1.52E-13 | 1.50E-22 |
| 129.6 | 3.41E-13 | 7.56E-27 | 144.6 | 5.14E-13 | 1.07E-23 | 159.6 | 3.07E-13 | 6.41E-23 | 174.6 | 1.50E-13 | 1.55E-22 |
| 129.7 | 3.40E-13 | 7.88E-27 | 144.7 | 5.14E-13 | 1.08E-23 | 159.7 | 3.05E-13 | 6.69E-23 | 174.7 | 1.50E-13 | 1.55E-22 |
| 129.8 | 3.26E-13 | 7.89E-27 | 144.8 | 5.25E-13 | 1.21E-23 | 159.8 | 3.05E-13 | 6.69E-23 | 174.8 | 1.50E-13 | 1.55E-22 |
| 129.9 | 3.30E-13 | 8.26E-27 | 144.9 | 5.26E-13 | 1.22E-23 | 159.9 | 2.92E-13 | 6.82E-23 | 174.9 | 1.50E-13 | 1.55E-22 |
| 130   | 3.28E-13 | 9.45E-27 | 145   | 5.26E-13 | 1.22E-23 | 160   | 2.92E-13 | 6.82E-23 | 175   | 1.49E-13 | 1.60E-22 |
| 130.1 | 3.31E-13 | 9.52E-27 | 145.1 | 5.26E-13 | 1.22E-23 | 160.1 | 2.92E-13 | 6.82E-23 | 175.1 | 1.49E-13 | 1.64E-22 |
| 130.2 | 3.26E-13 | 9.81E-27 | 145.2 | 5.30E-13 | 1.28E-23 | 160.2 | 2.83E-13 | 6.66E-23 | 175.2 | 1.50E-13 | 1.78E-22 |
| 130.3 | 3.38E-13 | 1.04E-26 | 145.3 | 5.34E-13 | 1.29E-23 | 160.3 | 2.75E-13 | 6.50E-23 | 175.3 | 1.50E-13 | 1.78E-22 |
| 130.4 | 3.62E-13 | 1.17E-26 | 145.4 | 5.34E-13 | 1.28E-23 | 160.4 | 2.80E-13 | 6.60E-23 | 175.4 | 1.47E-13 | 1.82E-22 |
| 130.5 | 3.65E-13 | 1.26E-26 | 145.5 | 5.39E-13 | 1.30E-23 | 160.5 | 2.80E-13 | 6.60E-23 | 175.5 | 1.47E-13 | 1.82E-22 |
| 130.6 | 3.96E-13 | 1.56E-26 | 145.6 | 5.39E-13 | 1.30E-23 | 160.6 | 2.80E-13 | 6.60E-23 | 175.6 | 1.47E-13 | 1.82E-22 |
| 130.7 | 4.10E-13 | 1.68E-26 | 145.7 | 5.46E-13 | 1.35E-23 | 160.7 | 2.80E-13 | 6.60E-23 | 175.7 | 1.47E-13 | 1.82E-22 |
| 130.8 | 4.18E-13 | 1.83E-26 | 145.8 | 5.46E-13 | 1.39E-23 | 160.8 | 2.78E-13 | 6.86E-23 | 175.8 | 1.47E-13 | 1.82E-22 |
| 130.9 | 4.15E-13 | 1.92E-26 | 145.9 | 5.51E-13 | 1.43E-23 | 160.9 | 2.78E-13 | 6.86E-23 | 175.9 | 1.47E-13 | 1.82E-22 |
| 131   | 4.35E-13 | 2.41E-26 | 146   | 5.55E-13 | 1.52E-23 | 161   | 2.78E-13 | 6.86E-23 | 176   | 1.47E-13 | 1.82E-22 |
| 131.1 | 4.42E-13 | 2.51E-26 | 146.1 | 5.41E-13 | 1.66E-23 | 161.1 | 2.79E-13 | 6.97E-23 | 176.1 | 1.47E-13 | 1.82E-22 |
| 131.2 | 4.76E-13 | 2.85E-26 | 146.2 | 5.35E-13 | 1.65E-23 | 161.2 | 2.79E-13 | 6.97E-23 | 176.2 | 1.46E-13 | 1.83E-22 |
| 131.3 | 4.93E-13 | 3.00E-26 | 146.3 | 5.57E-13 | 1.81E-23 | 161.3 | 2.79E-13 | 6.97E-23 | 176.3 | 1.46E-13 | 1.83E-22 |
| 131.4 | 4.97E-13 | 3.44E-26 | 146.4 | 5.58E-13 | 1.83E-23 | 161.4 | 2.79E-13 | 6.97E-23 | 176.4 | 1.44E-13 | 1.89E-22 |
| 131.5 | 5.30E-13 | 3.95E-26 | 146.5 | 5.52E-13 | 2.04E-23 | 161.5 | 2.73E-13 | 7.09E-23 | 176.5 | 1.44E-13 | 1.88E-22 |
| 131.6 | 5.47E-13 | 4.52E-26 | 146.6 | 5.71E-13 | 2.17E-23 | 161.6 | 2.73E-13 | 7.09E-23 | 176.6 | 1.44E-13 | 1.88E-22 |
| 131.7 | 5.53E-13 | 5.03E-26 | 146.7 | 5.89E-13 | 2.31E-23 | 161.7 | 2.73E-13 | 7.09E-23 | 176.7 | 1.44E-13 | 1.88E-22 |
| 131.8 | 5.53E-13 | 5.03E-26 | 146.8 | 5.82E-13 | 2.27E-23 | 161.8 | 2.68E-13 | 7.24E-23 | 176.8 | 1.44E-13 | 1.88E-22 |
| 131.9 | 5.27E-13 | 5.07E-26 | 146.9 | 5.93E-13 | 2.36E-23 | 161.9 | 2.65E-13 | 7.24E-23 | 176.9 | 1.44E-13 | 1.88E-22 |
| 132   | 5.26E-13 | 5.15E-26 | 147   | 5.90E-13 | 2.54E-23 | 162   | 2.66E-13 | 7.35E-23 | 177   | 1.44E-13 | 1.88E-22 |
| 132.1 | 5.06E-13 | 5.08E-26 | 147.1 | 6.07E-13 | 2.68E-23 | 162.1 | 2.66E-13 | 7.35E-23 | 177.1 | 1.41E-13 | 1.93E-22 |
| 132.2 | 5.04E-13 | 5.18E-26 | 147.2 | 5.78E-13 | 2.88E-23 | 162.2 | 2.66E-13 | 7.35E-23 | 177.2 | 1.43E-13 | 1.96E-22 |
| 132.3 | 5.19E-13 | 5.60E-26 | 147.3 | 5.82E-13 | 3.09E-23 | 162.3 | 2.61E-13 | 7.35E-23 | 177.3 | 1.43E-13 | 1.96E-22 |
| 132.4 | 5.53E-13 | 6.17E-26 | 147.4 | 5.82E-13 | 3.05E-23 | 162.4 | 2.61E-13 | 7.35E-23 | 177.4 | 1.41E-13 | 2.08E-22 |
| 132.5 | 5.66E-13 | 7.26E-26 | 147.5 | 5.64E-13 | 3.06E-23 | 162.5 | 2.61E-13 | 7.35E-23 | 177.5 | 1.41E-13 | 2.08E-22 |
| 132.6 | 5.67E-13 | 7.62E-26 | 147.6 | 5.64E-13 | 3.06E-23 | 162.6 | 2.61E-13 | 7.35E-23 | 177.6 | 1.41E-13 | 2.11E-22 |
| 132.7 | 5.89E-13 | 8.25E-26 | 147.7 | 5.78E-13 | 3.27E-23 | 162.7 | 2.61E-13 | 7.35E-23 | 177.7 | 1.38E-13 | 2.23E-22 |
| 132.8 | 6.06E-13 | 9.06E-26 | 147.8 | 5.62E-13 | 3.35E-23 | 162.8 | 2.55E-13 | 7.36E-23 | 177.8 | 1.38E-13 | 2.23E-22 |
| 132.9 | 6.20E-13 | 1.12E-25 | 147.9 | 5.62E-13 | 3.35E-23 | 162.9 | 2.55E-13 | 7.36E-23 | 177.9 | 1.37E-13 | 2.32E-22 |
| 133   | 6.38E-13 | 1.32E-25 | 148   | 5.64E-13 | 3.45E-23 | 163   | 2.55E-13 | 7.36E-23 | 178   | 1.37E-13 | 2.32E-22 |
| 133.1 | 6.60E-13 | 1.45E-25 | 148.1 | 5.64E-13 | 3.45E-23 | 163.1 | 2.58E-13 | 7.75E-23 | 178.1 | 1.36E-13 | 2.38E-22 |
| 133.2 | 6.50E-13 | 1.50E-25 | 148.2 | 5.64E-13 | 3.45E-23 | 163.2 | 2.58E-13 | 7.75E-23 | 178.2 | 1.36E-13 | 2.38E-22 |
| 133.3 | 6.66E-13 | 1.72E-25 | 148.3 | 5.64E-13 | 3.45E-23 | 163.3 | 2.58E-13 | 7.75E-23 | 178.3 | 1.36E-13 | 2.38E-22 |
| 133.4 | 6.80E-13 | 1.81E-25 | 148.4 | 5.64E-13 | 3.45E-23 | 163.4 | 2.53E-13 | 7.92E-23 | 178.4 | 1.36E-13 | 2.38E-22 |
| 133.5 | 6.91E-13 | 2.06E-25 | 148.5 | 5.64E-13 | 3.45E-23 | 163.5 | 2.53E-13 | 7.92E-23 | 178.5 | 1.36E-13 | 2.38E-22 |
| 133.6 | 6.81E-13 | 2.29E-25 | 148.6 | 5.55E-13 | 3.56E-23 | 163.6 | 2.53E-13 | 7.92E-23 | 178.6 | 1.36E-13 | 2.38E-22 |
| 133.7 | 6.83E-13 | 2.68E-25 | 148.7 | 5.55E-13 | 3.56E-23 | 163.7 | 2.46E-13 | 8.00E-23 | 178.7 | 1.36E-13 | 2.38E-22 |
| 133.8 | 6.77E-13 | 2.96E-25 | 148.8 | 5.55E-13 | 3.56E-23 | 163.8 | 2.46E-13 | 8.00E-23 | 178.8 | 1.36E-13 | 2.38E-22 |
| 133.9 | 6.90E-13 | 3.10E-25 | 148.9 | 5.55E-13 | 3.56E-23 | 163.9 | 2.46E-13 | 8.00E-23 | 178.9 | 1.34E-13 | 2.39E-22 |
| 134   | 6.96E-13 | 3.34E-25 | 149   | 5.55E-13 | 3.56E-23 | 164   | 2.45E-13 | 8.21E-23 | 179   | 1.35E-13 | 2.42E-22 |
| 134.1 | 7.44E-13 | 3.98E-25 | 149.1 | 5.55E-13 | 3.56E-23 | 164.1 | 2.40E-13 | 8.56E-23 | 179.1 | 1.31E-13 | 2.66E-22 |
| 134.2 | 7.62E-13 | 4.42E-25 | 149.2 | 5.55E-13 | 3.56E-23 | 164.2 | 2.37E-13 | 8.73E-23 | 179.2 | 1.31E-13 | 2.56E-22 |
| 134.3 | 7.69E-13 | 5.26E-25 | 149.3 | 5.55E-13 | 3.56E-23 | 164.3 | 2.37E-13 | 8.73E-23 | 179.3 | 1.31E-13 | 2.56E-22 |
| 134.4 | 7.70E-13 | 5.40E-25 | 1     |          |          |       |          |          |       |          |          |













































11.0 82094800 0.3004673 0.8772163 0.8422994 0.2644779 0.2928288 0.2346464
12.0 82094800 0.3004673 0.8772163 0.8422994 0.2644779 0.2928288 0.2346464
13.0 82094800 0.3004673 0.8772163 0.8422994 0.2644779 0.2928288 0.2346464
...
68.0 47043701 0.1333984 0.4330262 0.8666611 0.3781579 0.2765756
69.0 47043701 0.1333984 0.4330262 0.8666611 0.3781579 0.2765756
70.0 47043701 0.1333984 0.4330262 0.8666611 0.3781579 0.2765756
...
78.0 0.5232777 0.4141739 0.4848789 0.6054831 0.8317386 0.484246 0.2317821
79.0 0.5232777 0.4141739 0.4848789 0.6054831 0.8317386 0.484246 0.2317821
80.0 0.5232777 0.4141739 0.4848789 0.6054831 0.8317386 0.484246 0.2317821
...
113.0 0.7370183 0.0188184 0.3760443 0.6048484 0.2290730 0.2704252 0.4097691
114.0 0.7370183 0.0188184 0.3760443 0.6048484 0.2290730 0.2704252 0.4097691
115.0 0.7370183 0.0188184 0.3760443 0.6048484 0.2290730 0.2704252 0.4097691
...
683.0 0.1333984 0.4330262 0.8666611 0.3781579 0.2765756
684.0 0.1333984 0.4330262 0.8666611 0.3781579 0.2765756
685.0 0.1333984 0.4330262 0.8666611 0.3781579 0.2765756
...
783.0 0.5232777 0.4141739 0.4848789 0.6054831 0.8317386 0.484246 0.2317821
784.0 0.5232777 0.4141739 0.4848789 0.6054831 0.8317386 0.484246 0.2317821
785.0 0.5232777 0.4141739 0.4848789 0.6054831 0.8317386 0.484246 0.2317821
...
1133.0 0.7370183 0.0188184 0.3760443 0.6048484 0.2290730 0.2704252 0.4097691
1134.0 0.7370183 0.0188184 0.3760443 0.6048484 0.2290730 0.2704252 0.4097691
1135.0 0.7370183 0.0188184 0.3760443 0.6048484 0.2290730 0.2704252 0.4097691





























Table S16: eFAST analysis data for [LACT] with [G|O]=2 mM (only the parameters to which [LACT]'s variability is sensitive to appear)

| Time | discretization | K (G I)  | g        | V (IPW)  | alpha    | K (LACT) | G          | E   | L   |
|------|----------------|----------|----------|----------|----------|----------|------------|-----|-----|
| 0    | 0              | 0.0      | 0.0      | 0.0      | 0.0      | 0.0      | 0.0        | 0.0 | 0.0 |
| 0.1  | 0.037500       | 0.030663 | 0.044730 | 0.021317 | 0.044730 | 0.042048 | 0.099570   | 0.0 | 0.0 |
| 0.2  | 0.075000       | 0.015415 | 0.027608 | 0.027646 | 0.027646 | 0.027646 | 0.099621   | 0.0 | 0.0 |
| 0.3  | 0.025933       | 0.024578 | 0.025019 | 0.025363 | 0.024874 | 0.025177 | 0.099326   | 0.0 | 0.0 |
| 0.4  | 0.034347       | 0.024731 | 0.025192 | 0.025133 | 0.025002 | 0.025226 | 0.099120   | 0.0 | 0.0 |
| 0.5  | 0.024947       | 0.024985 | 0.025105 | 0.025111 | 0.025082 | 0.025126 | 0.099635   | 0.0 | 0.0 |
| 0.6  | 0.023832       | 0.025028 | 0.025078 | 0.025100 | 0.025063 | 0.025131 | 0.099613   | 0.0 | 0.0 |
| 0.7  | 0.023996       | 0.025084 | 0.025183 | 0.025271 | 0.025095 | 0.025246 | 0.099734   | 0.0 | 0.0 |
| 0.8  | 0.021714       | 0.025120 | 0.025106 | 0.025177 | 0.025067 | 0.025241 | 0.099759   | 0.0 | 0.0 |
| 0.9  | 0.021406       | 0.025162 | 0.025176 | 0.025246 | 0.025097 | 0.025288 | 0.099739   | 0.0 | 0.0 |
| 1.0  | 0.023326       | 0.025143 | 0.025105 | 0.025102 | 0.025102 | 0.025194 | 0.099783   | 0.0 | 0.0 |
| 1.1  | 0.023213       | 0.025198 | 0.025142 | 0.025142 | 0.025142 | 0.025191 | 0.099786   | 0.0 | 0.0 |
| 1.2  | 0.023205       | 0.025204 | 0.025135 | 0.025135 | 0.025135 | 0.025216 | 0.099785   | 0.0 | 0.0 |
| 1.3  | 0.023214       | 0.025247 | 0.025102 | 0.025241 | 0.025102 | 0.025208 | 0.099716   | 0.0 | 0.0 |
| 1.4  | 0.023184       | 0.025248 | 0.025184 | 0.025241 | 0.025184 | 0.025235 | 0.099715   | 0.0 | 0.0 |
| 1.5  | 0.022947       | 0.025208 | 0.025287 | 0.025203 | 0.025287 | 0.025299 | 0.099718   | 0.0 | 0.0 |
| 1.6  | 0.023235       | 0.025207 | 0.025208 | 0.025204 | 0.025207 | 0.025296 | 0.099749   | 0.0 | 0.0 |
| 1.7  | 0.023023       | 0.025217 | 0.025218 | 0.025218 | 0.025218 | 0.025297 | 0.099781   | 0.0 | 0.0 |
| 1.8  | 0.023544       | 0.025236 | 0.025287 | 0.025287 | 0.025287 | 0.025311 | 0.099783   | 0.0 | 0.0 |
| 1.9  | 0.023603       | 0.025256 | 0.025325 | 0.025324 | 0.025325 | 0.025351 | 0.099785   | 0.0 | 0.0 |
| 2.0  | 0.023782       | 0.025358 | 0.025322 | 0.02531  | 0.025348 | 0.025356 | 0.099739   | 0.0 | 0.0 |
| 2.1  | 0.023904       | 0.025305 | 0.025237 | 0.025304 | 0.025381 | 0.025381 | 0.099713   | 0.0 | 0.0 |
| 2.2  | 0.023044       | 0.025441 | 0.025367 | 0.025401 | 0.025382 | 0.025402 | 0.099730   | 0.0 | 0.0 |
| 2.3  | 0.023324       | 0.025427 | 0.025326 | 0.025428 | 0.025464 | 0.025429 | 0.099703   | 0.0 | 0.0 |
| 2.4  | 0.023416       | 0.025451 | 0.025441 | 0.025441 | 0.025441 | 0.025478 | 0.099757   | 0.0 | 0.0 |
| 2.5  | 0.023460       | 0.025443 | 0.025397 | 0.025451 | 0.025482 | 0.025486 | 0.099758   | 0.0 | 0.0 |
| 2.6  | 0.023533       | 0.025474 | 0.025401 | 0.025435 | 0.025451 | 0.025477 | 0.099795   | 0.0 | 0.0 |
| 2.7  | 0.023637       | 0.025456 | 0.025416 | 0.025446 | 0.025448 | 0.025506 | 0.099724   | 0.0 | 0.0 |
| 2.8  | 0.023718       | 0.025459 | 0.025429 | 0.025441 | 0.025486 | 0.025573 | 0.099704   | 0.0 | 0.0 |
| 2.9  | 0.023443       | 0.025474 | 0.025474 | 0.025474 | 0.025474 | 0.025562 | 0.099721   | 0.0 | 0.0 |
| 3.0  | 0.023376       | 0.025486 | 0.025445 | 0.025453 | 0.025462 | 0.025562 | 0.099723   | 0.0 | 0.0 |
| 3.1  | 0.023321       | 0.025486 | 0.025445 | 0.025453 | 0.025462 | 0.025562 | 0.099723   | 0.0 | 0.0 |
| 3.2  | 0.023321       | 0.025486 | 0.025445 | 0.025453 | 0.025462 | 0.025562 | 0.099723   | 0.0 | 0.0 |
| 3.3  | 0.023321       | 0.025486 | 0.025445 | 0.025453 | 0.025462 | 0.025562 | 0.099723   | 0.0 | 0.0 |
| 3.4  | 0.023321       | 0.025486 | 0.025445 | 0.025453 | 0.025462 | 0.025562 | 0.099723   | 0.0 | 0.0 |
| 3.5  | 0.023321       | 0.025486 | 0.025445 | 0.025453 | 0.025462 | 0.025562 | 0.099723   | 0.0 | 0.0 |
| 3.6  | 0.023321       | 0.025486 | 0.025445 | 0.025453 | 0.025462 | 0.025562 | 0.099723   | 0.0 | 0.0 |
| 3.7  | 0.023321       | 0.025486 | 0.025445 | 0.025453 | 0.025462 | 0.025562 | 0.099723   | 0.0 | 0.0 |
| 3.8  | 0.023321       | 0.025486 | 0.025445 | 0.025453 | 0.025462 | 0.025562 | 0.099723   | 0.0 | 0.0 |
| 3.9  | 0.023321       | 0.025486 | 0.025445 | 0.025453 | 0.025462 | 0.025562 | 0.099723   | 0.0 | 0.0 |
| 4.0  | 0.023321       | 0.025486 | 0.025445 | 0.025453 | 0.025462 | 0.025562 | 0.099723   | 0.0 | 0.0 |
| 4.1  | 0.023321       | 0.025486 | 0.025445 | 0.025453 | 0.025462 | 0.025562 | 0.099723   | 0.0 | 0.0 |
| 4.2  | 0.023321       | 0.025486 | 0.025445 | 0.025453 | 0.025462 | 0.025562 | 0.099723   | 0.0 | 0.0 |
| 4.3  | 0.023321       | 0.025486 | 0.025445 | 0.025453 | 0.025462 | 0.025562 | 0.099723   | 0.0 | 0.0 |
| 4.4  | 0.023321       | 0.025486 | 0.025445 | 0.025453 | 0.025462 | 0.025562 | 0.099723   | 0.0 | 0.0 |
| 4.5  | 0.023321       | 0.025486 | 0.025445 | 0.025453 | 0.025462 | 0.025562 | 0.099723   | 0.0 | 0.0 |
| 4.6  | 0.023321       | 0.025486 | 0.025445 | 0.025453 | 0.025462 | 0.025562 | 0.099723   | 0.0 | 0.0 |
| 4.7  | 0.023321       | 0.025486 | 0.025445 | 0.025453 | 0.025462 | 0.025562 | 0.099723   | 0.0 | 0.0 |
| 4.8  | 0.023321       | 0.025486 | 0.025445 | 0.025453 | 0.025462 | 0.025562 | 0.099723   | 0.0 | 0.0 |
| 4.9  | 0.023321       | 0.025486 | 0.025445 | 0.025453 | 0.025462 | 0.025562 | 0.099723   | 0.0 | 0.0 |
| 5.0  | 0.023321       | 0.025486 | 0.025445 | 0.025453 | 0.025462 | 0.025562 | 0.099723   | 0.0 | 0.0 |
| 5.1  | 0.023321       | 0.025486 | 0.025445 | 0.025453 | 0.025462 | 0.025562 | 0.099723   | 0.0 | 0.0 |
| 5.2  | 0.023321       | 0.025486 | 0.025445 | 0.025453 | 0.025462 | 0.025562 | 0.099723   | 0.0 | 0.0 |
| 5.3  | 0.023321       | 0.025486 | 0.025445 | 0.025453 | 0.025462 | 0.025562 | 0.099723   | 0.0 | 0.0 |
| 5.4  | 0.023321       | 0.025486 | 0.025445 | 0.025453 | 0.025462 | 0.025562 | 0.099723   | 0.0 | 0.0 |
| 5.5  | 0.023321       | 0.025486 | 0.025445 | 0.025453 | 0.025462 | 0.025562 | 0.099723   | 0.0 | 0.0 |
| 5.6  | 0.023321       | 0.025486 | 0.025445 | 0.025453 | 0.025462 | 0.025562 | 0.099723   | 0.0 | 0.0 |
| 5.7  | 0.023321       | 0.025486 | 0.025445 | 0.025453 | 0.025462 | 0.025562 | 0.099723   | 0.0 | 0.0 |
| 5.8  | 0.023321       | 0.025486 | 0.025445 | 0.025453 | 0.025462 | 0.025562 | 0.099723   | 0.0 | 0.0 |
| 5.9  | 0.023321       | 0.025486 | 0.025445 | 0.025453 | 0.025462 | 0.025562 | 0.099723   | 0.0 | 0.0 |
| 6.0  | 0.023321       | 0.025486 | 0.025445 | 0.025453 | 0.025462 | 0.025562 | 0.099723   | 0.0 | 0.0 |
| 6.1  | 0.023321       | 0.025486 | 0.025445 | 0.025453 | 0.025462 | 0.025562 | 0.099723   | 0.0 | 0.0 |
| 6.2  | 0.023321       | 0.025486 | 0.025445 | 0.025453 | 0.025462 | 0.025562 | 0.099723   | 0.0 | 0.0 |
| 6.3  | 0.023321       | 0.025486 | 0.025445 | 0.025453 | 0.025462 | 0.025562 | 0.099723   | 0.0 | 0.0 |
| 6.4  | 0.023321       | 0.025486 | 0.025445 | 0.025453 | 0.025462 | 0.025562 | 0.099723   | 0.0 | 0.0 |
| 6.5  | 0.023321       | 0.025486 | 0.025445 | 0.025453 | 0.025462 | 0.025562 | 0.099723   | 0.0 | 0.0 |
| 6.6  | 0.023321       | 0.025486 | 0.025445 | 0.025453 | 0.025462 | 0.025562 | 0.099723   | 0.0 | 0.0 |
| 6.7  | 0.023321       | 0.025486 | 0.025445 | 0.025453 | 0.025462 | 0.025562 | 0.099723   | 0.0 | 0.0 |
| 6.8  | 0.023321       | 0.025486 | 0.025445 | 0.025453 | 0.025462 | 0.025562 | 0.099723   | 0.0 | 0.0 |
| 6.9  | 0.023321       | 0.025486 | 0.025445 | 0.025453 | 0.025462 | 0.025562 | 0.099723   | 0.0 | 0.0 |
| 7.0  | 0.023321       | 0.025486 | 0.025445 | 0.025453 | 0.025462 | 0.025562 | 0.099723   | 0.0 | 0.0 |
| 7.1  | 0.023321       | 0.025486 | 0.025445 | 0.025453 | 0.025462 | 0.025562 | 0.099723   | 0.0 | 0.0 |
| 7.2  | 0.023321       | 0.025486 | 0.025445 | 0.025453 | 0.025462 | 0.025562 | 0.099723   | 0.0 | 0.0 |
| 7.3  | 0.023321       | 0.025486 | 0.025445 | 0.025453 | 0.025462 | 0.025562 | 0.099723   | 0.0 | 0.0 |
| 7.4  | 0.023321       | 0.025486 | 0.025445 | 0.025453 | 0.025462 | 0.025562 | 0.099723   | 0.0 | 0.0 |
| 7.5  | 0.023321       | 0.025486 | 0.025445 | 0.025453 | 0.025462 | 0.025562 | 0.099723   | 0.0 | 0.0 |
| 7.6  | 0.023321       | 0.025486 | 0.025445 | 0.025453 | 0.025462 | 0.025562 | 0.099723   | 0.0 | 0.0 |
| 7.7  | 0.023321       | 0.025486 | 0.025445 | 0.025453 | 0.025462 | 0.025562 | 0.099723   | 0.0 | 0.0 |
| 7.8  | 0.023321       | 0.025486 | 0.025445 | 0.025453 | 0.025462 | 0.025562 | 0.099723   | 0.0 | 0.0 |
| 7.9  | 0.023321       | 0.025486 | 0.025445 | 0.025453 | 0.025462 | 0.025562 | 0.099723   | 0.0 | 0.0 |
| 8.0  | 0.023321       | 0.025486 | 0.025445 | 0.025453 | 0.025462 | 0.025562 | 0.099723   | 0.0 | 0.0 |
| 8.1  | 0.023321       | 0.025486 | 0.025445 | 0.025453 | 0.025462 | 0.025562 | 0.099723   | 0.0 | 0.0 |
| 8.2  | 0.023321       | 0.025486 | 0.025445 | 0.025453 | 0.025462 | 0.025562 | 0.099723   | 0.0 | 0.0 |
| 8.3  | 0.023321       | 0.025486 | 0.025445 | 0.025453 | 0.025462 | 0.025562 | 0.099723   | 0.0 | 0.0 |
| 8.4  | 0.023321       | 0.025486 | 0.025445 | 0.025453 | 0.025462 | 0.025562 | 0.099723   | 0.0 | 0.0 |
| 8.5  | 0.023321       | 0.025486 | 0.025445 | 0.025453 | 0.025462 | 0.025562 | 0.099723   | 0.0 | 0.0 |
| 8.6  | 0.023321       | 0.025486 | 0.025445 | 0.025453 | 0.025462 | 0.025562 | 0.099723   | 0.0 | 0.0 |
| 8.7  | 0.023321       | 0.025486 | 0.025445 | 0.025453 | 0.025462 | 0.025562 | 0.099723   | 0.0 | 0.0 |
| 8.8  | 0.023321       | 0.025486 | 0.025445 | 0.025453 | 0.025462 | 0.025562 | 0.099723   | 0.0 | 0.0 |
| 8.9  | 0.023321       | 0.025486 | 0.025445 | 0.025453 | 0.025462 | 0.025562 | 0.099723   | 0.0 | 0.0 |
| 9.0  | 0.023321       | 0.025486 | 0.025445 | 0.025453 | 0.025462 | 0.025562 | 0.099723   | 0.0 | 0.0 |
| 9.1  | 0.023321       | 0.025486 | 0.025445 | 0.025453 | 0.025462 | 0.025562 | 0.099723   | 0.0 | 0.0 |
| 9.2  | 0.023321       | 0.025486 | 0.025445 | 0.025453 | 0.025462 | 0.025562 | 0.099723   | 0.0 | 0.0 |
| 9.3  | 0.023321       | 0.025486 | 0.025445 | 0.025453 | 0.025462 | 0.025562 | 0.099723   | 0.0 | 0.0 |
| 9.4  | 0.023321       | 0.025486 | 0.025445 | 0.025453 | 0.025462 | 0.025562 | 0.099723   | 0.0 | 0.0 |
| 9.5  | 0.023321       | 0.025486 | 0.025445 | 0.025453 | 0.025462 | 0.025562 | 0.099723   | 0.0 | 0.0 |
| 9.6  | 0.023321       | 0.025486 | 0.025445 | 0.025453 | 0.025462 | 0.025562 | 0.099723   | 0.0 | 0.0 |
| 9.7  | 0.023321       | 0.025486 | 0.025445 | 0.025453 | 0.025462 | 0.025562 | 0.099723   | 0.0 | 0.0 |
| 9.8  | 0.023321       | 0.025486 | 0.025445 | 0.025453 | 0.025462 | 0.025562 | 0.099723   | 0.0 | 0.0 |
| 9.9  | 0.023321       | 0.025486 | 0.025445 | 0.025453 | 0.025462 | 0.025562 | 0.099723   | 0.0 | 0.0 |
| 10.0 | 0.023321       | 0.025486 | 0.025445 | 0.025453 | 0.025462 | 0.025562 | 0.099723   | 0.0 | 0.0 |
| 10.1 | 0.023321       | 0.025486 | 0.025445 | 0.025453 | 0.025462 | 0.025562 | 0.099723</ |     |     |
